# Supplementary material for: Flowering as the Most Highly Sensitive Period of Grapevine (Vitis vinifera L. cv Mourvèdre) to the Botryosphaeria Dieback Agents Neofusicoccum parvum and Diplodia seriata Infection
Source: Int J Mol Sci. 2014 May 30;15(6):9644–69. doi: 10.3390/ijms15069644 (PMC4100114; doi:10.3390/ijms15069644)
Supplement: Supplementary File 1 — Supplementary Table (XLSX, 387 KB) [file ijms-15-09644-s001.xlsx]

## Sheet: Feuil1
Supplementary Table S1. List of peptides and the corresponding proteins identified by mass spectrometry using nano-LC-MS/MS in each spot during the G stage (Supplementary Table S1a), Flowering (Supplementary Table S1b) or the Véraison (Supplementary Table S1c).
spot	sample name	Protein name	Protein accession numbers	Protein molecular weight (Da)	Percentage sequence coverage	Peptide sequence	Best Mascot Ion score	Mascot Identity score	OMSSA -log(e) score	Variable modifications identified by spectrum	Observed m/z	Actual peptide mass (AMU)	Calculated +1H Peptide Mass (AMU)	Spectrum charge	Actual minus calculated peptide mass (AMU)	Actual minus calculated peptide mass (PPM)	Peptide start index	Peptide stop index	Number of unique peptides
2625	168	PREDICTED: tubulin alpha chain [Vitis vinifera]	gi|225429189	49536.8	0.0311	SLDIERPTYTNLNR	74.4	45.6	10.8		564.626	1690.86	1691.87	3	-0.007858	-4.645	216	229	1
2625	168	PREDICTED: 70 kDa peptidyl-prolyl isomerase [Vitis vinifera]	gi|359497288	64024.9	0.0981	ALEIDPDNR	45.5	42	5.75		521.762	1041.51	1042.52	2	0.0001381	0.1324	508	516	5
2625	168	PREDICTED: 70 kDa peptidyl-prolyl isomerase [Vitis vinifera]	gi|359497288	64024.9	0.0981	DLDEVFVK	18.2	43.9	4.69		482.753	963.492	964.499	2	0.0001381	0.1431	171	178	5
2625	168	PREDICTED: 70 kDa peptidyl-prolyl isomerase [Vitis vinifera]	gi|359497288	64024.9	0.0981	EGEGYERPNEGAVVK	27.3	43.6	7.74		545.263	1632.77	1633.78	3	-0.006758	-4.136	279	293	5
2625	168	PREDICTED: 70 kDa peptidyl-prolyl isomerase [Vitis vinifera]	gi|359497288	64024.9	0.0981	FTLGQGQVIK	27.9	43.3	6.56		545.818	1089.62	1090.63	2	0.003558	3.262	85	94	5
2625	168	PREDICTED: 70 kDa peptidyl-prolyl isomerase [Vitis vinifera]	gi|359497288	64024.9	0.0981	VILTVKPQYGFGEK	44.7	42	11.9		526.968	1577.88	1578.89	3	0.001162	0.736	221	234	5
2625	168	PREDICTED: luminal-binding protein 5 [Vitis vinifera]	gi|225426230	73565.5	0.435	ALSSQHQVR	53.3	42.9	6.41		513.278	1024.54	1025.55	2	0.0004781	0.4661	305	313	28
2625	168	PREDICTED: luminal-binding protein 5 [Vitis vinifera]	gi|225426230	73565.5	0.435	AmEDAGLEK	64.6	40.5	8.08	m2: Oxidation (+15.99)	490.224	978.434	979.44	2	0.000923	0.9424	352	360	28
2625	168	PREDICTED: luminal-binding protein 5 [Vitis vinifera]	gi|225426230	73565.5	0.435	ARFEELNNDLFR	39.4	44.7	11.5		508.589	1522.75	1523.76	3	-0.006498	-4.264	332	343	28
2625	168	PREDICTED: luminal-binding protein 5 [Vitis vinifera]	gi|225426230	73565.5	0.435	DAGVIAGLNVAR	40.8	42.8	10.9		578.323	1154.63	1155.65	2	-0.008482	-7.34	193	204	28
2625	168	PREDICTED: luminal-binding protein 5 [Vitis vinifera]	gi|225426230	73565.5	0.435	DAVVTVPAYFNDAQR	73.4	45.2	12.7		833.415	1664.82	1665.82	2	-6.194e-05	-0.03718	174	188	28
2625	168	PREDICTED: luminal-binding protein 5 [Vitis vinifera]	gi|225426230	73565.5	0.435	DGKPYIQVK	11.6	44.5	4.98		524.299	1046.58	1047.58	2	0.006758	6.451	130	138	28
2625	168	PREDICTED: luminal-binding protein 5 [Vitis vinifera]	gi|225426230	73565.5	0.435	DILLLDVAPLTLGIETVGGVMTK	57.2	39.9	0		790.115	2367.32	2368.34	3	-0.01156	-4.88	422	444	28
2625	168	PREDICTED: luminal-binding protein 5 [Vitis vinifera]	gi|225426230	73565.5	0.435	EAEEFAEEDKK	60	41.6	11.8		662.801	1323.59	1324.59	2	0.003998	3.018	553	563	28
2625	168	PREDICTED: luminal-binding protein 5 [Vitis vinifera]	gi|225426230	73565.5	0.435	EALEWLDDNQSAEKEDYDEK	122	37.1	17.4		809.684	2426.03	2427.05	3	-0.009718	-4.004	609	628	28
2625	168	PREDICTED: luminal-binding protein 5 [Vitis vinifera]	gi|225426230	73565.5	0.435	ETAEAFLGK	51.8	44.2	4.59		483.249	964.484	965.494	2	-0.002682	-2.778	162	170	28
2625	168	PREDICTED: luminal-binding protein 5 [Vitis vinifera]	gi|225426230	73565.5	0.435	EVEAVcNPIITAVYQR	114	45.4	12	c6: Carbamidomethyl (+57.02)	931.478	1860.94	1861.95	2	0.001733	0.9306	631	646	28
2625	168	PREDICTED: luminal-binding protein 5 [Vitis vinifera]	gi|225426230	73565.5	0.435	FEELNNDLFR	50.8	44.1	10.2		648.816	1295.62	1296.62	2	0.001918	1.479	334	343	28
2625	168	PREDICTED: luminal-binding protein 5 [Vitis vinifera]	gi|225426230	73565.5	0.435	IINEPTAAAIAYGLDK	91.3	44.6	11.6		553.971	1658.89	1659.9	3	0.003152	1.899	205	220	28
2625	168	PREDICTED: luminal-binding protein 5 [Vitis vinifera]	gi|225426230	73565.5	0.435	IINEPTAAAIAYGLDKK	81.6	42.2	13.5		596.672	1786.99	1787.99	3	0.01151	6.439	205	221	28
2625	168	PREDICTED: luminal-binding protein 5 [Vitis vinifera]	gi|225426230	73565.5	0.435	ImEYFIK	26.5	44.9	3.51	m2: Oxidation (+15.99)	480.251	958.488	959.491	2	0.004623	4.818	269	275	28
2625	168	PREDICTED: luminal-binding protein 5 [Vitis vinifera]	gi|225426230	73565.5	0.435	ITITNDK	42.8	44.5	4.03		402.728	803.441	804.446	2	0.002118	2.633	533	539	28
2625	168	PREDICTED: luminal-binding protein 5 [Vitis vinifera]	gi|225426230	73565.5	0.435	ITPSWVAFTDSER	77.3	44.9	9.71		503.585	1507.73	1508.74	3	0.003302	2.189	69	81	28
2625	168	PREDICTED: luminal-binding protein 5 [Vitis vinifera]	gi|225426230	73565.5	0.435	LADKLESDEK	56.2	46.1	11.3		574.298	1146.58	1147.58	2	0.004258	3.71	591	600	28
2625	168	PREDICTED: luminal-binding protein 5 [Vitis vinifera]	gi|225426230	73565.5	0.435	LADKLESDEKEK	59.2	45.7	8.52		468.912	1403.71	1404.72	3	-0.0005279	-0.3758	591	602	28
2625	168	PREDICTED: luminal-binding protein 5 [Vitis vinifera]	gi|225426230	73565.5	0.435	LIGEAAK	39.6	45.1	0.421		351.215	700.415	701.419	2	0.002838	4.046	82	88	28
2625	168	PREDICTED: luminal-binding protein 5 [Vitis vinifera]	gi|225426230	73565.5	0.435	LKEVEAVcNPIITAVYQR	49.6	44.3	12.6	c8: Carbamidomethyl (+57.02)	701.713	2102.12	2103.13	3	-0.003203	-1.523	629	646	28
2625	168	PREDICTED: luminal-binding protein 5 [Vitis vinifera]	gi|225426230	73565.5	0.435	LSQEEIDR	67.3	43.3	7.67		495.249	988.483	989.49	2	7.806e-05	0.07889	542	549	28
2625	168	PREDICTED: luminal-binding protein 5 [Vitis vinifera]	gi|225426230	73565.5	0.435	mKETAEAFLGK	14.8	43.9	4.71	m1: Oxidation (+15.99)	414.211	1239.61	1240.62	3	-0.007383	-5.951	160	170	28
2625	168	PREDICTED: luminal-binding protein 5 [Vitis vinifera]	gi|225426230	73565.5	0.435	NSLETYVYNMK	61	41.9	0		681.321	1360.63	1361.64	2	-0.006482	-4.76	572	582	28
2625	168	PREDICTED: luminal-binding protein 5 [Vitis vinifera]	gi|225426230	73565.5	0.435	NTVIPTKK	45.5	42.3	5.58		450.779	899.543	900.551	2	-0.001022	-1.135	449	456	28
2625	168	PREDICTED: luminal-binding protein 5 [Vitis vinifera]	gi|225426230	73565.5	0.435	TIFDVK	35.3	41.8	0		361.709	721.403	722.408	2	0.001598	2.212	98	103	28
2625	168	PREDICTED: luminal-binding protein 5 [Vitis vinifera]	gi|225426230	73565.5	0.435	VEIESLYDGLDFSEPLTR	98.9	45.3	11.7		1042.02	2082.03	2083.02	2	0.01012	4.857	314	331	28
2625	168	PREDICTED: luminal-binding protein 5 [Vitis vinifera]	gi|225426230	73565.5	0.435	VFSPEEISAMILTK	36.8	44.6	0		522.285	1563.83	1564.83	3	0.01117	7.139	146	159	28
2625	168	unnamed protein product [Vitis vinifera]	gi|297744216,gi|359480318	48261.2	0.185	ASPIQLGGR	60.5	42.6	3.69		449.757	897.5	898.511	2	-0.003422	-3.808	375	383	7
2625	168	unnamed protein product [Vitis vinifera]	gi|297744216,gi|359480318	48261.2	0.185	GQPSSSVAAQPVLNK	46.8	44.2	9.09		741.9	1481.79	1482.79	2	0.002218	1.496	255	269	7
2625	168	unnamed protein product [Vitis vinifera]	gi|297744216,gi|359480318	48261.2	0.185	IKPGGVFIR	40.4	40.6	2.82		329.543	985.607	986.615	3	-0.0001779	-0.1804	341	349	7
2625	168	unnamed protein product [Vitis vinifera]	gi|297744216,gi|359480318	48261.2	0.185	NLPPSVSTDDIEQEFK	86.7	44.7	10.9		909.945	1817.88	1818.88	2	0.007758	4.265	321	336	7
2625	168	unnamed protein product [Vitis vinifera]	gi|297744216,gi|359480318	48261.2	0.185	QQPDFVHQFYTDSSTMIR	33.6	44	0		734.016	2199.03	2200.01	3	0.02173	9.878	28	45	7
2625	168	unnamed protein product [Vitis vinifera]	gi|297744216,gi|359480318	48261.2	0.185	QVYIEER	38.9	44.3	3.75		468.743	935.471	936.479	2	0.0002381	0.2542	384	390	7
2625	168	unnamed protein product [Vitis vinifera]	gi|297744216,gi|359480318	48261.2	0.185	TYASILR	27.9	41.9	2.98		412.239	822.464	823.467	2	0.003718	4.515	246	252	7
2625	168	PREDICTED: heat shock cognate 70 kDa protein isoform 2 [Vitis vinifera]	gi|359486799	71154.1	0.386	ATAGDTHLGGEDFDNR	82.3	39.5	9.58		838.37	1674.73	1675.73	2	0.002758	1.646	227	242	17
2625	168	PREDICTED: heat shock cognate 70 kDa protein isoform 2 [Vitis vinifera]	gi|359486799	71154.1	0.386	cMEPVEK	44.4	39.8	0	c1: Carbamidomethyl (+57.02)	446.7	891.386	892.39	2	0.002913	3.264	319	325	17
2625	168	PREDICTED: heat shock cognate 70 kDa protein isoform 2 [Vitis vinifera]	gi|359486799	71154.1	0.386	DAGVIAGLNVmR	35	45.8	8.82	m11: Oxidation (+15.99)	616.326	1230.64	1231.65	2	-0.000917	-0.7445	164	175	17
2625	168	PREDICTED: heat shock cognate 70 kDa protein isoform 2 [Vitis vinifera]	gi|359486799	71154.1	0.386	EEIENMVQEAEK	55.7	41.3	0		724.831	1447.65	1448.66	2	-0.002122	-1.465	519	530	17
2625	168	PREDICTED: heat shock cognate 70 kDa protein isoform 2 [Vitis vinifera]	gi|359486799	71154.1	0.386	EIAEAYLGSTVK	50.3	44.6	8.93		640.84	1279.67	1280.67	2	-0.0006019	-0.47	133	144	17
2625	168	PREDICTED: heat shock cognate 70 kDa protein isoform 2 [Vitis vinifera]	gi|359486799	71154.1	0.386	ELESIcNPIIAK	59	45	10.4	c6: Carbamidomethyl (+57.02)	693.868	1385.72	1386.73	2	-0.001927	-1.39	604	615	17
2625	168	PREDICTED: heat shock cognate 70 kDa protein isoform 2 [Vitis vinifera]	gi|359486799	71154.1	0.386	EQVFSTYSDNQPGVLIQVYEGER	59.1	44.1	12.2		886.758	2657.25	2658.27	3	-0.009948	-3.742	431	453	17
2625	168	PREDICTED: heat shock cognate 70 kDa protein isoform 2 [Vitis vinifera]	gi|359486799	71154.1	0.386	FEELNmDLFR	52.6	41.5	10.7	m6: Oxidation (+15.99)	665.311	1328.61	1329.61	2	0.000883	0.6641	308	317	17
2625	168	PREDICTED: heat shock cognate 70 kDa protein isoform 2 [Vitis vinifera]	gi|359486799	71154.1	0.386	FSDASVQSDIK	68.4	43.6	12.1		598.793	1195.57	1196.58	2	-0.0002619	-0.2189	81	91	17
2625	168	PREDICTED: heat shock cognate 70 kDa protein isoform 2 [Vitis vinifera]	gi|359486799	71154.1	0.386	IINEPTAAAIAYGLDK	91.3	44.6	11.6		553.971	1658.89	1659.9	3	0.003152	1.899	176	191	17
2625	168	PREDICTED: heat shock cognate 70 kDa protein isoform 2 [Vitis vinifera]	gi|359486799	71154.1	0.386	IINEPTAAAIAYGLDKK	81.6	42.2	13.5		596.672	1786.99	1787.99	3	0.01151	6.439	176	192	17
2625	168	PREDICTED: heat shock cognate 70 kDa protein isoform 2 [Vitis vinifera]	gi|359486799	71154.1	0.386	ITITNDK	42.8	44.5	4.03		402.728	803.441	804.446	2	0.002118	2.633	507	513	17
2625	168	PREDICTED: heat shock cognate 70 kDa protein isoform 2 [Vitis vinifera]	gi|359486799	71154.1	0.386	LIGDAAK	33.9	46.1	-0.123		344.207	686.399	687.404	2	0.002878	4.187	53	59	17
2625	168	PREDICTED: heat shock cognate 70 kDa protein isoform 2 [Vitis vinifera]	gi|359486799	71154.1	0.386	MVNHFVQEFK	55.3	44.8	0		639.816	1277.62	1278.63	2	-0.005042	-3.943	243	252	17
2625	168	PREDICTED: heat shock cognate 70 kDa protein isoform 2 [Vitis vinifera]	gi|359486799	71154.1	0.386	NALENYAYNMR	57.9	41.3	0		679.811	1357.61	1358.62	2	-0.001582	-1.164	546	556	17
2625	168	PREDICTED: heat shock cognate 70 kDa protein isoform 2 [Vitis vinifera]	gi|359486799	71154.1	0.386	NQVAMNPINTVFDAK	71.6	45.3	0		554.614	1660.82	1661.83	3	-0.004378	-2.634	60	74	17
2625	168	PREDICTED: heat shock cognate 70 kDa protein isoform 2 [Vitis vinifera]	gi|359486799	71154.1	0.386	STIHDVVLVGGSTR	13.1	44	5.76		480.93	1439.77	1440.78	3	-0.003968	-2.754	335	348	17
2625	168	PREDICTED: heat shock cognate 70 kDa protein isoform 2 [Vitis vinifera]	gi|359486799	71154.1	0.386	TTPSYVAFTDTER	70.5	42.6	8.64		744.354	1486.69	1487.7	2	-0.0007619	-0.5122	40	52	17
2625	168	PREDICTED: heat shock cognate 70 kDa protein isoform 2 [Vitis vinifera]	gi|359486799	71154.1	0.386	VEIIANDQGNR	62	44.2	9.64		614.818	1227.62	1228.63	2	0.0002381	0.1938	29	39	17
2625	168	PREDICTED: heat shock cognate 70 kDa protein isoform 2 [Vitis vinifera]	gi|359486799	71154.1	0.386	VVPGPGDKPMITVTYK	71.9	44.4	0		567.98	1700.92	1701.92	3	0.0005821	0.342	97	112	17
2625	168	PREDICTED: tubulin beta-1 chain [Vitis vinifera]	gi|225440131	50228.2	0.128	FPGQLNSDLR	70.2	45.6	10		573.797	1145.58	1146.59	2	-0.002842	-2.479	242	251	5
2625	168	PREDICTED: tubulin beta-1 chain [Vitis vinifera]	gi|225440131	50228.2	0.128	GHYTEGAELIDSVLDVVR	60.4	45.3	12.6		658.342	1972	1973	3	0.01374	6.965	104	121	5
2625	168	PREDICTED: tubulin beta-1 chain [Vitis vinifera]	gi|225440131	50228.2	0.128	IREEYPDR	17.4	45.3	4.8		359.85	1076.53	1077.53	3	0.003842	3.566	155	162	5
2625	168	PREDICTED: tubulin beta-1 chain [Vitis vinifera]	gi|225440131	50228.2	0.128	LAVNLIPFPR	44.6	38	9.14		570.353	1138.69	1139.69	2	0.005018	4.403	253	262	5
2625	168	PREDICTED: tubulin beta-1 chain [Vitis vinifera]	gi|225440131	50228.2	0.128	YVGTSDLQLER	27.3	45	8.04		640.824	1279.63	1280.65	2	-0.008102	-6.326	36	46	5
2625	168	PREDICTED: luminal-binding protein 5-like [Vitis vinifera]	gi|359490716	73473.5	0.424	ALSSQHQVR	53.3	42.9	6.41		513.278	1024.54	1025.55	2	0.0004781	0.4661	305	313	6
2625	168	PREDICTED: luminal-binding protein 5-like [Vitis vinifera]	gi|359490716	73473.5	0.424	AmEDAGLEK	64.6	40.5	8.08	m2: Oxidation (+15.99)	490.224	978.434	979.44	2	0.000923	0.9424	352	360	6
2625	168	PREDICTED: luminal-binding protein 5-like [Vitis vinifera]	gi|359490716	73473.5	0.424	ARFEELNNDLFR	39.4	44.7	11.5		508.589	1522.75	1523.76	3	-0.006498	-4.264	332	343	6
2625	168	PREDICTED: luminal-binding protein 5-like [Vitis vinifera]	gi|359490716	73473.5	0.424	DAGIIAGLNVAR	57	42.4	11.3		585.335	1168.66	1169.66	2	-0.0008819	-0.754	193	204	6
2625	168	PREDICTED: luminal-binding protein 5-like [Vitis vinifera]	gi|359490716	73473.5	0.424	DAVVTVPAYFNDAQR	73.4	45.2	12.7		833.415	1664.82	1665.82	2	-6.194e-05	-0.03718	174	188	6
2625	168	PREDICTED: luminal-binding protein 5-like [Vitis vinifera]	gi|359490716	73473.5	0.424	DGKPYIQVK	11.6	44.5	4.98		524.299	1046.58	1047.58	2	0.006758	6.451	130	138	6
2625	168	PREDICTED: luminal-binding protein 5-like [Vitis vinifera]	gi|359490716	73473.5	0.424	DILLLDVAPLTLGIETVGGVMTK	57.2	39.9	0		790.115	2367.32	2368.34	3	-0.01156	-4.88	422	444	6
2625	168	PREDICTED: luminal-binding protein 5-like [Vitis vinifera]	gi|359490716	73473.5	0.424	EAEEFAEEDKK	60	41.6	11.8		662.801	1323.59	1324.59	2	0.003998	3.018	553	563	6
2625	168	PREDICTED: luminal-binding protein 5-like [Vitis vinifera]	gi|359490716	73473.5	0.424	ETAEAFLGK	51.8	44.2	4.59		483.249	964.484	965.494	2	-0.002682	-2.778	162	170	6
2625	168	PREDICTED: luminal-binding protein 5-like [Vitis vinifera]	gi|359490716	73473.5	0.424	EVEAVcNPIITAVYQR	114	45.4	12	c6: Carbamidomethyl (+57.02)	931.478	1860.94	1861.95	2	0.001733	0.9306	631	646	6
2625	168	PREDICTED: luminal-binding protein 5-like [Vitis vinifera]	gi|359490716	73473.5	0.424	EYFDGKEPNK	52.8	42.5	8.21		409.529	1225.57	1226.57	3	0.004882	3.98	384	393	6
2625	168	PREDICTED: luminal-binding protein 5-like [Vitis vinifera]	gi|359490716	73473.5	0.424	FDLSGIAPAPR	48.6	44.9	9.75		572.313	1142.61	1143.62	2	0.002058	1.8	491	501	6
2625	168	PREDICTED: luminal-binding protein 5-like [Vitis vinifera]	gi|359490716	73473.5	0.424	FEELNNDLFR	50.8	44.1	10.2		648.816	1295.62	1296.62	2	0.001918	1.479	334	343	6
2625	168	PREDICTED: luminal-binding protein 5-like [Vitis vinifera]	gi|359490716	73473.5	0.424	IINEPTAAAIAYGLDK	91.3	44.6	11.6		553.971	1658.89	1659.9	3	0.003152	1.899	205	220	6
2625	168	PREDICTED: luminal-binding protein 5-like [Vitis vinifera]	gi|359490716	73473.5	0.424	IINEPTAAAIAYGLDKK	81.6	42.2	13.5		596.672	1786.99	1787.99	3	0.01151	6.439	205	221	6
2625	168	PREDICTED: luminal-binding protein 5-like [Vitis vinifera]	gi|359490716	73473.5	0.424	ImEYFIK	26.5	44.9	3.51	m2: Oxidation (+15.99)	480.251	958.488	959.491	2	0.004623	4.818	269	275	6
2625	168	PREDICTED: luminal-binding protein 5-like [Vitis vinifera]	gi|359490716	73473.5	0.424	ITITNDK	42.8	44.5	4.03		402.728	803.441	804.446	2	0.002118	2.633	533	539	6
2625	168	PREDICTED: luminal-binding protein 5-like [Vitis vinifera]	gi|359490716	73473.5	0.424	ITPSWVAFTDTER	76.8	45.1	8.89		508.26	1521.76	1522.75	3	0.01227	8.059	69	81	6
2625	168	PREDICTED: luminal-binding protein 5-like [Vitis vinifera]	gi|359490716	73473.5	0.424	LADKLESEEK	75.7	46.2	10.3		581.304	1160.59	1161.6	2	0.001158	0.9969	591	600	6
2625	168	PREDICTED: luminal-binding protein 5-like [Vitis vinifera]	gi|359490716	73473.5	0.424	LIGEAAK	39.6	45.1	0.421		351.215	700.415	701.419	2	0.002838	4.046	82	88	6
2625	168	PREDICTED: luminal-binding protein 5-like [Vitis vinifera]	gi|359490716	73473.5	0.424	LKEVEAVcNPIITAVYQR	49.6	44.3	12.6	c8: Carbamidomethyl (+57.02)	701.713	2102.12	2103.13	3	-0.003203	-1.523	629	646	6
2625	168	PREDICTED: luminal-binding protein 5-like [Vitis vinifera]	gi|359490716	73473.5	0.424	LSQEEIDR	67.3	43.3	7.67		495.249	988.483	989.49	2	7.806e-05	0.07889	542	549	6
2625	168	PREDICTED: luminal-binding protein 5-like [Vitis vinifera]	gi|359490716	73473.5	0.424	mKETAEAFLGK	14.8	43.9	4.71	m1: Oxidation (+15.99)	414.211	1239.61	1240.62	3	-0.007383	-5.951	160	170	6
2625	168	PREDICTED: luminal-binding protein 5-like [Vitis vinifera]	gi|359490716	73473.5	0.424	NSLESYVYNMK	52.8	42.3	0		674.318	1346.62	1347.62	2	0.004498	3.338	572	582	6
2625	168	PREDICTED: luminal-binding protein 5-like [Vitis vinifera]	gi|359490716	73473.5	0.424	NTVIPTKK	45.5	42.3	5.58		450.779	899.543	900.551	2	-0.001022	-1.135	449	456	6
2625	168	PREDICTED: luminal-binding protein 5-like [Vitis vinifera]	gi|359490716	73473.5	0.424	VEIESLYDGLDFSEPLTR	98.9	45.3	11.7		1042.02	2082.03	2083.02	2	0.01012	4.857	314	331	6
2625	168	PREDICTED: luminal-binding protein 5-like [Vitis vinifera]	gi|359490716	73473.5	0.424	VFSPEEISAMILTK	36.8	44.6	0		522.285	1563.83	1564.83	3	0.01117	7.139	146	159	6
2625	168	PREDICTED: stromal 70 kDa heat shock-related protein, chloroplastic-like [Vitis vinifera]	gi|225456004	75617.2	0.535	AKFEELcSDLLDR	80.7	44.7	13.1	c7: Carbamidomethyl (+57.02)	798.393	1594.77	1595.77	2	0.004473	2.803	368	380	35
2625	168	PREDICTED: stromal 70 kDa heat shock-related protein, chloroplastic-like [Vitis vinifera]	gi|225456004	75617.2	0.535	AVVTVPAYFNDSQR	78.5	45.3	10.7		783.895	1565.78	1566.79	2	-0.008222	-5.248	208	221	35
2625	168	PREDICTED: stromal 70 kDa heat shock-related protein, chloroplastic-like [Vitis vinifera]	gi|225456004	75617.2	0.535	DAISGGSTQVMK	71.5	44.8	0		597.298	1192.58	1193.58	2	0.005078	4.254	639	650	35
2625	168	PREDICTED: stromal 70 kDa heat shock-related protein, chloroplastic-like [Vitis vinifera]	gi|225456004	75617.2	0.535	DAMAALNQEVMQLGQSLYNQPGAPGAGPAPGSEAGPSESSGK	57.2	43.1	0		814.791	4068.92	4069.89	5	0.039	9.582	651	692	35
2625	168	PREDICTED: stromal 70 kDa heat shock-related protein, chloroplastic-like [Vitis vinifera]	gi|225456004	75617.2	0.535	DEGIDLLK	35.2	45.6	5.6		451.741	901.468	902.483	2	-0.008142	-9.022	312	319	35
2625	168	PREDICTED: stromal 70 kDa heat shock-related protein, chloroplastic-like [Vitis vinifera]	gi|225456004	75617.2	0.535	DEGIDLLKDK	44.2	45.1	10.1		573.305	1144.6	1145.61	2	-0.002002	-1.748	312	321	35
2625	168	PREDICTED: stromal 70 kDa heat shock-related protein, chloroplastic-like [Vitis vinifera]	gi|225456004	75617.2	0.535	DLDEVILVGGSTR	61.9	45.8	11.4		687.369	1372.72	1373.73	2	0.003018	2.197	398	410	35
2625	168	PREDICTED: stromal 70 kDa heat shock-related protein, chloroplastic-like [Vitis vinifera]	gi|225456004	75617.2	0.535	FDIDANGILSVTAIDK	51.8	45.7	11.4		846.442	1690.87	1691.89	2	-0.008602	-5.084	541	556	35
2625	168	PREDICTED: stromal 70 kDa heat shock-related protein, chloroplastic-like [Vitis vinifera]	gi|225456004	75617.2	0.535	FEELcSDLLDR	52.3	42.1	8.02	c5: Carbamidomethyl (+57.02)	466.218	1395.63	1396.64	3	-0.0008032	-0.5751	370	380	35
2625	168	PREDICTED: stromal 70 kDa heat shock-related protein, chloroplastic-like [Vitis vinifera]	gi|225456004	75617.2	0.535	GPDGDVIDADFTDSK	74.4	39.7	11.5		776.343	1550.67	1551.68	2	-0.001542	-0.9937	693	707	35
2625	168	PREDICTED: stromal 70 kDa heat shock-related protein, chloroplastic-like [Vitis vinifera]	gi|225456004	75617.2	0.535	HIETTLTR	40	42.9	8		485.77	969.526	970.532	2	0.001558	1.605	360	367	35
2625	168	PREDICTED: stromal 70 kDa heat shock-related protein, chloroplastic-like [Vitis vinifera]	gi|225456004	75617.2	0.535	IAGLEVLR	55.7	42.7	9.09		435.776	869.537	870.541	2	0.003218	3.697	230	237	35
2625	168	PREDICTED: stromal 70 kDa heat shock-related protein, chloroplastic-like [Vitis vinifera]	gi|225456004	75617.2	0.535	IINEPTAASLAYGFEK	94.1	44.8	11.6		862.455	1722.89	1723.89	2	0.01146	6.647	238	253	35
2625	168	PREDICTED: stromal 70 kDa heat shock-related protein, chloroplastic-like [Vitis vinifera]	gi|225456004	75617.2	0.535	IPAVQELVK	33.8	38	9.16		498.81	995.605	996.609	2	0.003578	3.59	411	419	35
2625	168	PREDICTED: stromal 70 kDa heat shock-related protein, chloroplastic-like [Vitis vinifera]	gi|225456004	75617.2	0.535	KDEGIDLLK	44.1	46.3	9.14		515.794	1029.57	1030.58	2	0.003098	3.006	311	319	35
2625	168	PREDICTED: stromal 70 kDa heat shock-related protein, chloroplastic-like [Vitis vinifera]	gi|225456004	75617.2	0.535	KLVDDASK	48.4	45.6	8.34		438.246	874.478	875.483	2	0.001978	2.259	192	199	35
2625	168	PREDICTED: stromal 70 kDa heat shock-related protein, chloroplastic-like [Vitis vinifera]	gi|225456004	75617.2	0.535	KMSEVDEESK	76.5	41.9	0		591.272	1180.53	1181.54	2	0.001758	1.488	146	155	35
2625	168	PREDICTED: stromal 70 kDa heat shock-related protein, chloroplastic-like [Vitis vinifera]	gi|225456004	75617.2	0.535	KQDITITGASTLPTDEVER	86.6	45.2	11		692.029	2073.06	2074.07	3	0.005142	2.479	561	579	35
2625	168	PREDICTED: stromal 70 kDa heat shock-related protein, chloroplastic-like [Vitis vinifera]	gi|225456004	75617.2	0.535	LDGIPPAPR	53.7	45	6.98		468.266	934.517	935.531	2	-0.006802	-7.271	524	532	35
2625	168	PREDICTED: stromal 70 kDa heat shock-related protein, chloroplastic-like [Vitis vinifera]	gi|225456004	75617.2	0.535	LEcPAIGK	24.1	44.4	4.82	c3: Carbamidomethyl (+57.02)	444.235	886.456	887.466	2	-0.002147	-2.42	171	178	35
2625	168	PREDICTED: stromal 70 kDa heat shock-related protein, chloroplastic-like [Vitis vinifera]	gi|225456004	75617.2	0.535	LKTPVENSLR	57.5	44.1	6.3		578.838	1155.66	1156.67	2	0.0003781	0.3269	381	390	35
2625	168	PREDICTED: stromal 70 kDa heat shock-related protein, chloroplastic-like [Vitis vinifera]	gi|225456004	75617.2	0.535	LTETAEK	35.6	46.2	2.8		396.21	790.406	791.415	2	-0.001682	-2.125	327	333	35
2625	168	PREDICTED: stromal 70 kDa heat shock-related protein, chloroplastic-like [Vitis vinifera]	gi|225456004	75617.2	0.535	mELSSLTQTNISLPFITATADGPK	122	45.3	14.6	m1: Oxidation (+15.99)	1276.15	2550.29	2551.3	2	-0.000577	-0.2261	336	359	35
2625	168	PREDICTED: stromal 70 kDa heat shock-related protein, chloroplastic-like [Vitis vinifera]	gi|225456004	75617.2	0.535	MSEVDEESK	78.4	36.8	0		527.224	1052.43	1053.44	2	0.0002781	0.264	147	155	35
2625	168	PREDICTED: stromal 70 kDa heat shock-related protein, chloroplastic-like [Vitis vinifera]	gi|225456004	75617.2	0.535	MVSEAER	40.2	43.5	0		411.198	820.381	821.382	2	0.006018	7.327	580	586	35
2625	168	PREDICTED: stromal 70 kDa heat shock-related protein, chloroplastic-like [Vitis vinifera]	gi|225456004	75617.2	0.535	NQADSVVYQTEK	80.2	43.7	10.1		691.334	1380.65	1381.66	2	0.001538	1.113	602	613	35
2625	168	PREDICTED: stromal 70 kDa heat shock-related protein, chloroplastic-like [Vitis vinifera]	gi|225456004	75617.2	0.535	NTTLPTSK	37.2	46.3	4.48		431.238	860.461	861.468	2	0.0003581	0.4156	480	487	35
2625	168	PREDICTED: stromal 70 kDa heat shock-related protein, chloroplastic-like [Vitis vinifera]	gi|225456004	75617.2	0.535	QAVVNPENTFFSVK	59.8	44.9	10.5		790.412	1578.81	1579.81	2	0.005298	3.354	127	140	35
2625	168	PREDICTED: stromal 70 kDa heat shock-related protein, chloroplastic-like [Vitis vinifera]	gi|225456004	75617.2	0.535	QDITITGASTLPTDEVER	80.5	45.2	11.6		973.489	1944.96	1945.97	2	-8.194e-05	-0.04211	562	579	35
2625	168	PREDICTED: stromal 70 kDa heat shock-related protein, chloroplastic-like [Vitis vinifera]	gi|225456004	75617.2	0.535	QFAAEEISAQVLR	84.1	45.6	10.7		731.39	1460.77	1461.77	2	0.002678	1.832	179	191	35
2625	168	PREDICTED: stromal 70 kDa heat shock-related protein, chloroplastic-like [Vitis vinifera]	gi|225456004	75617.2	0.535	RQAVVNPENTFFSVK	39.6	44.9	9.24		579.308	1734.9	1735.91	3	-0.003668	-2.113	126	140	35
2625	168	PREDICTED: stromal 70 kDa heat shock-related protein, chloroplastic-like [Vitis vinifera]	gi|225456004	75617.2	0.535	TPVENSLR	48.7	45.3	6.99		458.25	914.485	915.489	2	0.002378	2.598	383	390	35
2625	168	PREDICTED: stromal 70 kDa heat shock-related protein, chloroplastic-like [Vitis vinifera]	gi|225456004	75617.2	0.535	TTPSVVAYTK	38.5	43.8	7.38		533.793	1065.57	1066.58	2	-0.0001419	-0.1331	105	114	35
2625	168	PREDICTED: stromal 70 kDa heat shock-related protein, chloroplastic-like [Vitis vinifera]	gi|225456004	75617.2	0.535	VVDWLAASFK	69.5	44.8	10.5		568.314	1134.61	1135.61	2	0.006038	5.317	301	310	35
2625	168	PREDICTED: stromal 70 kDa heat shock-related protein, chloroplastic-like [Vitis vinifera]	gi|225456004	75617.2	0.535	VVGIDLGTTNSAVAAMEGGKPTIVTNAEGQR	170	44.6	0		1019.53	3055.56	3056.57	3	-0.0001979	-0.06476	74	104	35
2625	168	PREDICTED: heat shock cognate 70 kDa protein isoform 1 [Vitis vinifera]	gi|225440324	71049	0.3	ATAGDTHLGGEDFDNR	82.3	39.5	9.58		838.37	1674.73	1675.73	2	0.002758	1.646	227	242	3
2625	168	PREDICTED: heat shock cognate 70 kDa protein isoform 1 [Vitis vinifera]	gi|225440324	71049	0.3	cMEPVEK	44.4	39.8	0	c1: Carbamidomethyl (+57.02)	446.7	891.386	892.39	2	0.002913	3.264	319	325	3
2625	168	PREDICTED: heat shock cognate 70 kDa protein isoform 1 [Vitis vinifera]	gi|225440324	71049	0.3	DAGVIAGLNVmR	35	45.8	8.82	m11: Oxidation (+15.99)	616.326	1230.64	1231.65	2	-0.000917	-0.7445	164	175	3
2625	168	PREDICTED: heat shock cognate 70 kDa protein isoform 1 [Vitis vinifera]	gi|225440324	71049	0.3	EIAEAYLGSAVK	39	45.1	7.97		625.834	1249.65	1250.66	2	-0.002722	-2.176	133	144	3
2625	168	PREDICTED: heat shock cognate 70 kDa protein isoform 1 [Vitis vinifera]	gi|225440324	71049	0.3	ELESIcNPIIAK	59	45	10.4	c6: Carbamidomethyl (+57.02)	693.868	1385.72	1386.73	2	-0.001927	-1.39	604	615	3
2625	168	PREDICTED: heat shock cognate 70 kDa protein isoform 1 [Vitis vinifera]	gi|225440324	71049	0.3	FEELNmDLFR	52.6	41.5	10.7	m6: Oxidation (+15.99)	665.311	1328.61	1329.61	2	0.000883	0.6641	308	317	3
2625	168	PREDICTED: heat shock cognate 70 kDa protein isoform 1 [Vitis vinifera]	gi|225440324	71049	0.3	FSDATVQSDIK	73.1	43.9	11.9		605.799	1209.58	1210.6	2	-0.004102	-3.388	81	91	3
2625	168	PREDICTED: heat shock cognate 70 kDa protein isoform 1 [Vitis vinifera]	gi|225440324	71049	0.3	IINEPTAAAIAYGLDK	91.3	44.6	11.6		553.971	1658.89	1659.9	3	0.003152	1.899	176	191	3
2625	168	PREDICTED: heat shock cognate 70 kDa protein isoform 1 [Vitis vinifera]	gi|225440324	71049	0.3	IINEPTAAAIAYGLDKK	81.6	42.2	13.5		596.672	1786.99	1787.99	3	0.01151	6.439	176	192	3
2625	168	PREDICTED: heat shock cognate 70 kDa protein isoform 1 [Vitis vinifera]	gi|225440324	71049	0.3	ITITNDK	42.8	44.5	4.03		402.728	803.441	804.446	2	0.002118	2.633	507	513	3
2625	168	PREDICTED: heat shock cognate 70 kDa protein isoform 1 [Vitis vinifera]	gi|225440324	71049	0.3	MVNHFVQEFK	55.3	44.8	0		639.816	1277.62	1278.63	2	-0.005042	-3.943	243	252	3
2625	168	PREDICTED: heat shock cognate 70 kDa protein isoform 1 [Vitis vinifera]	gi|225440324	71049	0.3	NALENYAYNMR	57.9	41.3	0		679.811	1357.61	1358.62	2	-0.001582	-1.164	546	556	3
2625	168	PREDICTED: heat shock cognate 70 kDa protein isoform 1 [Vitis vinifera]	gi|225440324	71049	0.3	NQVAMNPINTVFDAK	71.6	45.3	0		554.614	1660.82	1661.83	3	-0.004378	-2.634	60	74	3
2625	168	PREDICTED: heat shock cognate 70 kDa protein isoform 1 [Vitis vinifera]	gi|225440324	71049	0.3	TTPSYVAFTDTER	70.5	42.6	8.64		744.354	1486.69	1487.7	2	-0.0007619	-0.5122	40	52	3
2625	168	PREDICTED: heat shock cognate 70 kDa protein isoform 1 [Vitis vinifera]	gi|225440324	71049	0.3	VEIIANDQGNR	62	44.2	9.64		614.818	1227.62	1228.63	2	0.0002381	0.1938	29	39	3
2625	168	PREDICTED: heat shock cognate 70 kDa protein isoform 1 [Vitis vinifera]	gi|225440324	71049	0.3	VVAGPGDKPMIVVNYK	58.2	44.2	0		562.978	1685.91	1686.92	3	-0.004658	-2.761	97	112	3
2625	168	PREDICTED: protein disulfide-isomerase [Vitis vinifera]	gi|225459587	55654.6	0.0401	GESSVTGPLVR	18.5	45.4	5.68		551.297	1100.58	1101.59	2	-0.003642	-3.306	209	219	2
2625	168	PREDICTED: protein disulfide-isomerase [Vitis vinifera]	gi|225459587	55654.6	0.0401	IVIVGVFPK	54.5	39.8	7.34		486.32	970.626	971.629	2	0.004058	4.177	167	175	2
2625	168	PREDICTED: heat shock cognate 70 kDa protein isoform 1 [Vitis vinifera]	gi|225434984	71218.6	0.347	ATAGDTHLGGEDFDNR	82.3	39.5	9.58		838.37	1674.73	1675.73	2	0.002758	1.646	227	242	2
2625	168	PREDICTED: heat shock cognate 70 kDa protein isoform 1 [Vitis vinifera]	gi|225434984	71218.6	0.347	cMEPVEK	44.4	39.8	0	c1: Carbamidomethyl (+57.02)	446.7	891.386	892.39	2	0.002913	3.264	319	325	2
2625	168	PREDICTED: heat shock cognate 70 kDa protein isoform 1 [Vitis vinifera]	gi|225434984	71218.6	0.347	DAGVIAGLNVmR	35	45.8	8.82	m11: Oxidation (+15.99)	616.326	1230.64	1231.65	2	-0.000917	-0.7445	164	175	2
2625	168	PREDICTED: heat shock cognate 70 kDa protein isoform 1 [Vitis vinifera]	gi|225434984	71218.6	0.347	EIAEAYLGSTVK	50.3	44.6	8.93		640.84	1279.67	1280.67	2	-0.0006019	-0.47	133	144	2
2625	168	PREDICTED: heat shock cognate 70 kDa protein isoform 1 [Vitis vinifera]	gi|225434984	71218.6	0.347	ELESIcNPIIAK	59	45	10.4	c6: Carbamidomethyl (+57.02)	693.868	1385.72	1386.73	2	-0.001927	-1.39	604	615	2
2625	168	PREDICTED: heat shock cognate 70 kDa protein isoform 1 [Vitis vinifera]	gi|225434984	71218.6	0.347	EQVFSTYSDNQPGVLIQVYEGER	59.1	44.1	12.2		886.758	2657.25	2658.27	3	-0.009948	-3.742	431	453	2
2625	168	PREDICTED: heat shock cognate 70 kDa protein isoform 1 [Vitis vinifera]	gi|225434984	71218.6	0.347	FEELNmDLFR	52.6	41.5	10.7	m6: Oxidation (+15.99)	665.311	1328.61	1329.61	2	0.000883	0.6641	308	317	2
2625	168	PREDICTED: heat shock cognate 70 kDa protein isoform 1 [Vitis vinifera]	gi|225434984	71218.6	0.347	FSDSSVQSDIK	71.3	42.1	11.9		606.79	1211.57	1212.57	2	-0.0005819	-0.4799	81	91	2
2625	168	PREDICTED: heat shock cognate 70 kDa protein isoform 1 [Vitis vinifera]	gi|225434984	71218.6	0.347	IINEPTAAAIAYGLDK	91.3	44.6	11.6		553.971	1658.89	1659.9	3	0.003152	1.899	176	191	2
2625	168	PREDICTED: heat shock cognate 70 kDa protein isoform 1 [Vitis vinifera]	gi|225434984	71218.6	0.347	IINEPTAAAIAYGLDKK	81.6	42.2	13.5		596.672	1786.99	1787.99	3	0.01151	6.439	176	192	2
2625	168	PREDICTED: heat shock cognate 70 kDa protein isoform 1 [Vitis vinifera]	gi|225434984	71218.6	0.347	ITITNDK	42.8	44.5	4.03		402.728	803.441	804.446	2	0.002118	2.633	507	513	2
2625	168	PREDICTED: heat shock cognate 70 kDa protein isoform 1 [Vitis vinifera]	gi|225434984	71218.6	0.347	LIGDAAK	33.9	46.1	-0.123		344.207	686.399	687.404	2	0.002878	4.187	53	59	2
2625	168	PREDICTED: heat shock cognate 70 kDa protein isoform 1 [Vitis vinifera]	gi|225434984	71218.6	0.347	MVNHFVQEFK	55.3	44.8	0		639.816	1277.62	1278.63	2	-0.005042	-3.943	243	252	2
2625	168	PREDICTED: heat shock cognate 70 kDa protein isoform 1 [Vitis vinifera]	gi|225434984	71218.6	0.347	NALENYAYNMR	57.9	41.3	0		679.811	1357.61	1358.62	2	-0.001582	-1.164	546	556	2
2625	168	PREDICTED: heat shock cognate 70 kDa protein isoform 1 [Vitis vinifera]	gi|225434984	71218.6	0.347	NQVAMNPINTVFDAK	71.6	45.3	0		554.614	1660.82	1661.83	3	-0.004378	-2.634	60	74	2
2625	168	PREDICTED: heat shock cognate 70 kDa protein isoform 1 [Vitis vinifera]	gi|225434984	71218.6	0.347	TTPSYVAFTDTER	70.5	42.6	8.64		744.354	1486.69	1487.7	2	-0.0007619	-0.5122	40	52	2
2625	168	PREDICTED: heat shock cognate 70 kDa protein isoform 1 [Vitis vinifera]	gi|225434984	71218.6	0.347	VEIIANDQGNR	62	44.2	9.64		614.818	1227.62	1228.63	2	0.0002381	0.1938	29	39	2
2625	168	PREDICTED: heat shock cognate 70 kDa protein isoform 1 [Vitis vinifera]	gi|225434984	71218.6	0.347	VIPGPGDKPmIVVVYK	5.35	42.7	7.58	m10: Oxidation (+15.99)	576.661	1726.96	1727.98	3	-0.007563	-4.377	97	112	2
2625	168	hypothetical protein VITISV_015564 [Vitis vinifera]	gi|147794068	66672.6	0.133	ASPIQLGGR	60.5	42.6	3.69		449.757	897.5	898.511	2	-0.003422	-3.808	432	440	7
2625	168	hypothetical protein VITISV_015564 [Vitis vinifera]	gi|147794068	66672.6	0.133	GQPSSSVAAQPILSK	74.8	43.9	10.3		735.4	1468.79	1469.8	2	-0.003622	-2.464	312	326	7
2625	168	hypothetical protein VITISV_015564 [Vitis vinifera]	gi|147794068	66672.6	0.133	IKPGGVFIR	40.4	40.6	2.82		329.543	985.607	986.615	3	-0.0001779	-0.1804	398	406	7
2625	168	hypothetical protein VITISV_015564 [Vitis vinifera]	gi|147794068	66672.6	0.133	NLPPSVSTDDIEQEFK	86.7	44.7	10.9		909.945	1817.88	1818.88	2	0.007758	4.265	378	393	7
2625	168	hypothetical protein VITISV_015564 [Vitis vinifera]	gi|147794068	66672.6	0.133	QQPDFVHQFYTDSSTMIR	33.6	44	0		734.016	2199.03	2200.01	3	0.02173	9.878	59	76	7
2625	168	hypothetical protein VITISV_015564 [Vitis vinifera]	gi|147794068	66672.6	0.133	QVYIEER	38.9	44.3	3.75		468.743	935.471	936.479	2	0.0002381	0.2542	441	447	7
2625	168	hypothetical protein VITISV_015564 [Vitis vinifera]	gi|147794068	66672.6	0.133	TYASILR	27.9	41.9	2.98		412.239	822.464	823.467	2	0.003718	4.515	303	309	7
4623	169	PREDICTED: d-3-phosphoglycerate dehydrogenase, chloroplastic-like [Vitis vinifera]	gi|225428898	62538	0.106	GGVIDEEALVR	57.8	44.4	7.06		579.313	1156.61	1157.62	2	0.002118	1.83	284	294	6
4623	169	PREDICTED: d-3-phosphoglycerate dehydrogenase, chloroplastic-like [Vitis vinifera]	gi|225428898	62538	0.106	LAVQLVSGGSGVK	61	44.1	12.8		607.859	1213.7	1214.71	2	0.0005581	0.4594	390	402	6
4623	169	PREDICTED: d-3-phosphoglycerate dehydrogenase, chloroplastic-like [Vitis vinifera]	gi|225428898	62538	0.106	LGAAGLDLLK	41.6	40.3	7.71		485.801	969.587	970.593	2	0.001198	1.234	62	71	6
4623	169	PREDICTED: d-3-phosphoglycerate dehydrogenase, chloroplastic-like [Vitis vinifera]	gi|225428898	62538	0.106	NVAQADASVK	58	44.6	6.81		501.764	1001.51	1002.52	2	-0.0003419	-0.3411	167	176	6
4623	169	PREDICTED: d-3-phosphoglycerate dehydrogenase, chloroplastic-like [Vitis vinifera]	gi|225428898	62538	0.106	QVDQPGmIGK	32.3	43.9	2.66	m7: Oxidation (+15.99)	544.774	1087.53	1088.54	2	-0.000337	-0.3095	528	537	6
4623	169	PREDICTED: d-3-phosphoglycerate dehydrogenase, chloroplastic-like [Vitis vinifera]	gi|225428898	62538	0.106	YVGVSLVGK	28.5	42.7	5.28		461.275	920.536	921.54	2	0.002518	2.732	185	193	6
4623	169	PREDICTED: luminal-binding protein 5 [Vitis vinifera]	gi|225426230	73565.5	0.0195	QIDEIVLVGGSTR	70.7	44.7	10.3		693.884	1385.75	1386.76	2	0.0009581	0.6909	362	374	1
4623	169	PREDICTED: chaperonin CPN60-2, mitochondrial isoform 1 [Vitis vinifera]	gi|225433375	61352.9	0.687	AALQDLATLTGGELITEELGLNLEK	96.5	42.1	9.8		871.477	2611.41	2612.4	3	0.01306	5	318	342	33
4623	169	PREDICTED: chaperonin CPN60-2, mitochondrial isoform 1 [Vitis vinifera]	gi|225433375	61352.9	0.687	AELDMLGTcK	70.6	43	0	c9: Carbamidomethyl (+57.02)	569.269	1136.52	1137.53	2	0.003493	3.07	343	352	33
4623	169	PREDICTED: chaperonin CPN60-2, mitochondrial isoform 1 [Vitis vinifera]	gi|225433375	61352.9	0.687	AGIIDPLK	55.2	40.7	6.15		413.757	825.5	826.504	2	0.003678	4.45	523	530	33
4623	169	PREDICTED: chaperonin CPN60-2, mitochondrial isoform 1 [Vitis vinifera]	gi|225433375	61352.9	0.687	AIFTEGcK	47.9	42.3	5.25	c7: Carbamidomethyl (+57.02)	463.226	924.438	925.445	2	3.276e-05	0.0354	129	136	33
4623	169	PREDICTED: chaperonin CPN60-2, mitochondrial isoform 1 [Vitis vinifera]	gi|225433375	61352.9	0.687	APGFGENR	38.5	41.8	4.44		424.206	846.397	847.406	2	-0.001882	-2.221	309	316	33
4623	169	PREDICTED: chaperonin CPN60-2, mitochondrial isoform 1 [Vitis vinifera]	gi|225433375	61352.9	0.687	APGFGENRK	42.8	45	3.74		488.252	974.489	975.501	2	-0.004022	-4.123	309	317	33
4623	169	PREDICTED: chaperonin CPN60-2, mitochondrial isoform 1 [Vitis vinifera]	gi|225433375	61352.9	0.687	cELENPLVLIHEK	63.7	44.7	9.2	c1: Carbamidomethyl (+57.02)	531.953	1592.84	1593.83	3	0.01239	7.772	244	256	33
4623	169	PREDICTED: chaperonin CPN60-2, mitochondrial isoform 1 [Vitis vinifera]	gi|225433375	61352.9	0.687	DDTVILDGAGDK	63.7	43.5	11.3		609.797	1217.58	1218.59	2	0.001978	1.623	359	370	33
4623	169	PREDICTED: chaperonin CPN60-2, mitochondrial isoform 1 [Vitis vinifera]	gi|225433375	61352.9	0.687	DDTVILDGAGDKK	69.6	45.1	11.6		673.844	1345.67	1346.68	2	0.0008781	0.652	359	371	33
4623	169	PREDICTED: chaperonin CPN60-2, mitochondrial isoform 1 [Vitis vinifera]	gi|225433375	61352.9	0.687	EGVITISDGK	53.1	45.7	7.77		509.777	1017.54	1018.54	2	0.005418	5.319	203	212	33
4623	169	PREDICTED: chaperonin CPN60-2, mitochondrial isoform 1 [Vitis vinifera]	gi|225433375	61352.9	0.687	ELDKLPTSNFDQK	46.4	45.3	7.07		512.262	1533.76	1534.78	3	-0.004168	-2.716	456	468	33
4623	169	PREDICTED: chaperonin CPN60-2, mitochondrial isoform 1 [Vitis vinifera]	gi|225433375	61352.9	0.687	EVPAMGGGMGGmDY	24.5	28.8	0	m12: Oxidation (+15.99)	694.269	1386.52	1387.53	2	-0.001457	-1.05	562	575	33
4623	169	PREDICTED: chaperonin CPN60-2, mitochondrial isoform 1 [Vitis vinifera]	gi|225433375	61352.9	0.687	FGVEAR	47.2	46.6	0.0732		339.681	677.348	678.357	2	-0.002082	-3.069	39	44	33
4623	169	PREDICTED: chaperonin CPN60-2, mitochondrial isoform 1 [Vitis vinifera]	gi|225433375	61352.9	0.687	GEYVDmVK	28	40.9	5.19	m6: Oxidation (+15.99)	478.725	955.436	956.439	2	0.003763	3.934	515	522	33
4623	169	PREDICTED: chaperonin CPN60-2, mitochondrial isoform 1 [Vitis vinifera]	gi|225433375	61352.9	0.687	GISmAVDAVVTNLK	84.6	45	10.2	m4: Oxidation (+15.99)	717.388	1432.76	1433.77	2	0.001003	0.6996	150	163	33
4623	169	PREDICTED: chaperonin CPN60-2, mitochondrial isoform 1 [Vitis vinifera]	gi|225433375	61352.9	0.687	GVEELADAVR	46.4	44.8	9.39		529.778	1057.54	1058.55	2	0.001698	1.604	50	59	33
4623	169	PREDICTED: chaperonin CPN60-2, mitochondrial isoform 1 [Vitis vinifera]	gi|225433375	61352.9	0.687	GYISPYFITNQK	57.8	44.7	11.1		715.867	1429.72	1430.73	2	-0.004002	-2.797	229	240	33
4623	169	PREDICTED: chaperonin CPN60-2, mitochondrial isoform 1 [Vitis vinifera]	gi|225433375	61352.9	0.687	IGGASEAEVSEK	77.1	44.6	10.1		588.792	1175.57	1176.57	2	0.002638	2.242	412	423	33
4623	169	PREDICTED: chaperonin CPN60-2, mitochondrial isoform 1 [Vitis vinifera]	gi|225433375	61352.9	0.687	IGGASEAEVSEKK	39.2	45.4	9.71		435.56	1303.66	1304.67	3	-0.003448	-2.643	412	424	33
4623	169	PREDICTED: chaperonin CPN60-2, mitochondrial isoform 1 [Vitis vinifera]	gi|225433375	61352.9	0.687	IGVQIIQNALK	38.8	37.3	10.6		598.876	1195.74	1196.74	2	0.007878	6.583	469	479	33
4623	169	PREDICTED: chaperonin CPN60-2, mitochondrial isoform 1 [Vitis vinifera]	gi|225433375	61352.9	0.687	ISNIHAVVK	43.4	39.8	9.4		490.8	979.584	980.589	2	0.002898	2.955	258	266	33
4623	169	PREDICTED: chaperonin CPN60-2, mitochondrial isoform 1 [Vitis vinifera]	gi|225433375	61352.9	0.687	KAALQDLATLTGGELITEELGLNLEK	71.2	40.8	15.3		914.173	2739.5	2740.5	3	0.006842	2.497	317	342	33
4623	169	PREDICTED: chaperonin CPN60-2, mitochondrial isoform 1 [Vitis vinifera]	gi|225433375	61352.9	0.687	LLEQDNPDLGYDAAK	65.9	44	9.69		831.403	1660.79	1661.8	2	-0.002702	-1.626	500	514	33
4623	169	PREDICTED: chaperonin CPN60-2, mitochondrial isoform 1 [Vitis vinifera]	gi|225433375	61352.9	0.687	MISTSEEIAQVGTISANGER	53.6	45.1	0		698.345	2092.01	2093.02	3	0.002612	1.248	168	187	33
4623	169	PREDICTED: chaperonin CPN60-2, mitochondrial isoform 1 [Vitis vinifera]	gi|225433375	61352.9	0.687	NVVLEQSFGAPK	69.3	45.5	10.5		644.851	1287.69	1288.69	2	0.005358	4.158	68	79	33
4623	169	PREDICTED: chaperonin CPN60-2, mitochondrial isoform 1 [Vitis vinifera]	gi|225433375	61352.9	0.687	QVANATNDVAGDGTTcATVLTR	190	44.6	13	c16: Carbamidomethyl (+57.02)	1118.04	2234.06	2235.07	2	0.004453	1.992	107	128	33
4623	169	PREDICTED: chaperonin CPN60-2, mitochondrial isoform 1 [Vitis vinifera]	gi|225433375	61352.9	0.687	SAIELSTSDYDK	59.2	42.5	11.4		664.817	1327.62	1328.62	2	0.004538	3.416	382	393	33
4623	169	PREDICTED: chaperonin CPN60-2, mitochondrial isoform 1 [Vitis vinifera]	gi|225433375	61352.9	0.687	SAIELSTSDYDKEK	83.7	43.5	9.69		529.257	1584.75	1585.76	3	-0.003588	-2.263	382	395	33
4623	169	PREDICTED: chaperonin CPN60-2, mitochondrial isoform 1 [Vitis vinifera]	gi|225433375	61352.9	0.687	SVAAGMNAMDLR	89.3	43.6	0		618.298	1234.58	1235.59	2	0.002558	2.07	137	148	33
4623	169	PREDICTED: chaperonin CPN60-2, mitochondrial isoform 1 [Vitis vinifera]	gi|225433375	61352.9	0.687	TALVDAASVSSLMTTTEAVVVELPKDEK	60.6	44.4	0		968.842	2903.5	2904.51	3	-0.001088	-0.3746	534	561	33
4623	169	PREDICTED: chaperonin CPN60-2, mitochondrial isoform 1 [Vitis vinifera]	gi|225433375	61352.9	0.687	TLYNELEVVEGMK	64.2	45	0		508.925	1523.75	1524.76	3	-0.002508	-1.645	213	225	33
4623	169	PREDICTED: chaperonin CPN60-2, mitochondrial isoform 1 [Vitis vinifera]	gi|225433375	61352.9	0.687	TQRPLLIVAEDVESEALATLILNK	41.7	38.6	12.2		879.498	2635.47	2636.49	3	-0.008248	-3.128	274	297	33
4623	169	PREDICTED: chaperonin CPN60-2, mitochondrial isoform 1 [Vitis vinifera]	gi|225433375	61352.9	0.687	VTDALNATK	58	45.9	6.85		466.756	931.497	932.505	2	-0.0006419	-0.6884	427	435	33
4623	169	PREDICTED: stromal 70 kDa heat shock-related protein, chloroplastic-like [Vitis vinifera]	gi|225456004	75617.2	0.207	AKFEELcSDLLDR	65.9	44.7	12.6	c7: Carbamidomethyl (+57.02)	798.393	1594.77	1595.77	2	0.004453	2.79	368	380	9
4623	169	PREDICTED: stromal 70 kDa heat shock-related protein, chloroplastic-like [Vitis vinifera]	gi|225456004	75617.2	0.207	DLDEVILVGGSTR	52.7	45.8	11.8		687.368	1372.72	1373.73	2	0.002018	1.469	398	410	9
4623	169	PREDICTED: stromal 70 kDa heat shock-related protein, chloroplastic-like [Vitis vinifera]	gi|225456004	75617.2	0.207	GPDGDVIDADFTDSK	111	40.3	13.5		776.346	1550.68	1551.68	2	0.003418	2.203	693	707	9
4623	169	PREDICTED: stromal 70 kDa heat shock-related protein, chloroplastic-like [Vitis vinifera]	gi|225456004	75617.2	0.207	KLVDDASK	42	45.6	4.96		438.246	874.477	875.483	2	0.001118	1.277	192	199	9
4623	169	PREDICTED: stromal 70 kDa heat shock-related protein, chloroplastic-like [Vitis vinifera]	gi|225456004	75617.2	0.207	KQDITITGASTLPTDEVER	25.6	45.5	10.2		692.026	2073.06	2074.07	3	-0.003678	-1.773	561	579	9
4623	169	PREDICTED: stromal 70 kDa heat shock-related protein, chloroplastic-like [Vitis vinifera]	gi|225456004	75617.2	0.207	MELSSLTQTNISLPFITATADGPK	50.6	45.3	0		845.772	2534.29	2535.3	3	-0.001228	-0.4843	336	359	9
4623	169	PREDICTED: stromal 70 kDa heat shock-related protein, chloroplastic-like [Vitis vinifera]	gi|225456004	75617.2	0.207	QFAAEEISAQVLR	76	45.7	12.2		731.385	1460.76	1461.77	2	-0.006902	-4.722	179	191	9
4623	169	PREDICTED: stromal 70 kDa heat shock-related protein, chloroplastic-like [Vitis vinifera]	gi|225456004	75617.2	0.207	VVDWLAASFK	63.1	43.8	9.82		568.315	1134.62	1135.61	2	0.008318	7.325	301	310	9
4623	169	PREDICTED: stromal 70 kDa heat shock-related protein, chloroplastic-like [Vitis vinifera]	gi|225456004	75617.2	0.207	VVGIDLGTTNSAVAAMEGGKPTIVTNAEGQR	174	44.6	0		1019.53	3055.56	3056.57	3	-0.001428	-0.4672	74	104	9
4623	169	PREDICTED: leucine aminopeptidase 2, chloroplastic isoform 1 [Vitis vinifera]	gi|225445867,gi|297743644	60726.3	0.0412	EVLAASEASGEK	52.2	45.2	9.44		595.801	1189.59	1190.59	2	0.004318	3.627	490	501	2
4623	169	PREDICTED: leucine aminopeptidase 2, chloroplastic isoform 1 [Vitis vinifera]	gi|225445867,gi|297743644	60726.3	0.0412	IASAYSDVLSAK	43.8	44.4	5.83		612.827	1223.64	1224.65	2	-0.0009619	-0.7855	292	303	2
4623	169	RecName: Full=ATP synthase subunit alpha, chloroplastic; AltName: Full=ATP synthase F1 sector subunit alpha; AltName: Full=F-ATPase subunit alpha	gi|118573497,gi|224365667	55427.7	0.0237	LIESPAPGIISR	51.8	40.7	11.9		626.866	1251.72	1252.73	2	-0.0004019	-0.3209	129	140	1
3227	170	unnamed protein product [Vitis vinifera]	gi|297734906,gi|359479422	32971	0.112	AAVNAYTR	46.7	44.2	3.01		433.229	864.443	865.452	2	-0.001822	-2.105	234	241	4
3227	170	unnamed protein product [Vitis vinifera]	gi|297734906,gi|359479422	32971	0.112	FIVTR	32.8	42.2	0		318.2	634.385	635.388	2	0.004458	7.016	82	86	4
3227	170	unnamed protein product [Vitis vinifera]	gi|297734906,gi|359479422	32971	0.112	GIGLEIcR	52.4	46.9	3.74	c7: Carbamidomethyl (+57.02)	459.247	916.479	917.487	2	-0.001007	-1.098	22	29	4
3227	170	unnamed protein product [Vitis vinifera]	gi|297734906,gi|359479422	32971	0.112	GWPTQTSAYTISK	73.3	44.9	10.7		720.366	1438.72	1439.72	2	0.008518	5.916	221	233	4
3227	170	unnamed protein product [Vitis vinifera]	gi|297734907,gi|359479424	39757.5	0.0847	GIGLEIcR	52.4	46.9	3.74	c7: Carbamidomethyl (+57.02)	459.247	916.479	917.487	2	-0.001007	-1.098	84	91	1
3227	170	unnamed protein product [Vitis vinifera]	gi|297734907,gi|359479424	39757.5	0.0847	GWPTQTSAYTISK	73.3	44.9	10.7		720.366	1438.72	1439.72	2	0.008518	5.916	283	295	1
3227	170	unnamed protein product [Vitis vinifera]	gi|297734907,gi|359479424	39757.5	0.0847	IVNVSAGLGK	41.5	43.3	6.91		479.29	956.565	957.573	2	-0.0007019	-0.733	230	239	1
3227	170	PREDICTED: uncharacterized protein LOC100244246 [Vitis vinifera]	gi|225454759	29314.7	0.0614	LPAAASVQPR	49.6	40.5	11.1		505.294	1008.57	1009.58	2	0.0008781	0.8697	81	90	2
3227	170	PREDICTED: uncharacterized protein LOC100244246 [Vitis vinifera]	gi|225454759	29314.7	0.0614	VVSLDQK	47.1	44.8	3.38		394.73	787.446	788.451	2	0.002058	2.61	146	152	2
3227	170	PREDICTED: chaperonin CPN60-2, mitochondrial isoform 1 [Vitis vinifera]	gi|225433375	61352.9	0.153	GISMAVDAVVTNLK	71.7	44.8	0		709.394	1416.77	1417.77	2	0.009078	6.403	150	163	5
3227	170	PREDICTED: chaperonin CPN60-2, mitochondrial isoform 1 [Vitis vinifera]	gi|225433375	61352.9	0.153	IGGASEAEVSEK	76.6	44.3	11.6		588.79	1175.57	1176.57	2	-0.002102	-1.786	412	423	5
3227	170	PREDICTED: chaperonin CPN60-2, mitochondrial isoform 1 [Vitis vinifera]	gi|225433375	61352.9	0.153	NVVLEQSFGAPK	53.8	45.8	11.5		644.848	1287.68	1288.69	2	-0.001622	-1.259	68	79	5
3227	170	PREDICTED: chaperonin CPN60-2, mitochondrial isoform 1 [Vitis vinifera]	gi|225433375	61352.9	0.153	QVANATNDVAGDGTTcATVLTR	84.7	44.3	12.1	c16: Carbamidomethyl (+57.02)	745.694	2234.06	2235.07	3	-6.324e-05	-0.0283	107	128	5
3227	170	PREDICTED: chaperonin CPN60-2, mitochondrial isoform 1 [Vitis vinifera]	gi|225433375	61352.9	0.153	TALVDAASVSSLMTTTEAVVVELPKDEK	97.2	44.3	0		968.842	2903.5	2904.51	3	-0.0006979	-0.2403	534	561	5
3227	170	PREDICTED: uncharacterized oxidoreductase ykwC-like [Vitis vinifera]	gi|359485993	39240.6	0.0293	VAVLPGAALNK	58.3	36.5	10		526.826	1051.64	1052.65	2	-0.001782	-1.693	332	342	1
3227	170	PREDICTED: stromal 70 kDa heat shock-related protein, chloroplastic-like [Vitis vinifera]	gi|225456004	75617.2	0.0891	KQDITITGASTLPTDEVER	42	45.6	9.5		692.025	2073.05	2074.07	3	-0.007338	-3.538	561	579	3
3227	170	PREDICTED: stromal 70 kDa heat shock-related protein, chloroplastic-like [Vitis vinifera]	gi|225456004	75617.2	0.0891	QFAAEEISAQVLR	67.6	45.7	10.6		731.386	1460.76	1461.77	2	-0.004502	-3.08	179	191	3
3227	170	PREDICTED: stromal 70 kDa heat shock-related protein, chloroplastic-like [Vitis vinifera]	gi|225456004	75617.2	0.0891	VVGIDLGTTNSAVAAMEGGKPTIVTNAEGQR	56.2	44.5	0		1019.53	3055.56	3056.57	3	0.002472	0.8088	74	104	3
3227	170	PREDICTED: 3-oxoacyl-[acyl-carrier-protein] reductase, chloroplastic [Vitis vinifera]	gi|225425854	33968	0.121	AIALALGK	40.1	39.5	5.97		378.752	755.489	756.498	2	-0.001842	-2.435	102	109	3
3227	170	PREDICTED: 3-oxoacyl-[acyl-carrier-protein] reductase, chloroplastic [Vitis vinifera]	gi|225425854	33968	0.121	IINIASVVGLVGNVGQANYSAAK	35.1	40.6	11.8		753.427	2257.26	2258.25	3	0.01589	7.037	219	241	3
3227	170	PREDICTED: 3-oxoacyl-[acyl-carrier-protein] reductase, chloroplastic [Vitis vinifera]	gi|225425854	33968	0.121	ILETIPLGR	39	36.7	6.09		506.314	1010.61	1011.62	2	0.0007381	0.7296	286	294	3
3227	170	PREDICTED: putative fructokinase-5-like [Vitis vinifera]	gi|225459906,gi|297734728	34925.1	0.232	APGGAPANVAcAITK	69.3	44.4	10.3	c11: Carbamidomethyl (+57.02)	699.365	1396.71	1397.72	2	0.001233	0.882	38	52	6
3227	170	PREDICTED: putative fructokinase-5-like [Vitis vinifera]	gi|225459906,gi|297734728	34925.1	0.232	GAIPALPTNSDALDLVNK	65.3	43.9	10.7		904.992	1807.97	1808.98	2	0.0008781	0.4854	307	324	6
3227	170	PREDICTED: putative fructokinase-5-like [Vitis vinifera]	gi|225459906,gi|297734728	34925.1	0.232	LGGNSAFIGK	62	45.4	8.27		482.268	962.521	963.526	2	0.002878	2.987	53	62	6
3227	170	PREDICTED: putative fructokinase-5-like [Vitis vinifera]	gi|225459906,gi|297734728	34925.1	0.232	LLVVTDGEK	40.8	44.9	6.31		487.281	972.547	973.557	2	-0.002842	-2.919	229	237	6
3227	170	PREDICTED: putative fructokinase-5-like [Vitis vinifera]	gi|225459906,gi|297734728	34925.1	0.232	LPLWPSAQAAIDGIK	67.9	41.2	11.7		790.452	1578.89	1579.88	2	0.01202	7.607	175	189	6
3227	170	PREDICTED: putative fructokinase-5-like [Vitis vinifera]	gi|225459906,gi|297734728	34925.1	0.232	TALAFVTLK	41.7	37.1	8.05		482.296	962.578	963.587	2	-0.002562	-2.659	94	102	6
3227	170	PREDICTED: uncharacterized protein At1g03900 isoform 1 [Vitis vinifera]	gi|225438091,gi|359480294	29884.8	0.169	ESSVETVLDSSR	58.3	44.1	10.4		654.817	1307.62	1308.63	2	-0.0008419	-0.6434	82	93	4
3227	170	PREDICTED: uncharacterized protein At1g03900 isoform 1 [Vitis vinifera]	gi|225438091,gi|359480294	29884.8	0.169	mTSSGVDLK	36.8	42.6	6.85	m1: Oxidation (+15.99)	477.233	952.451	953.461	2	-0.002477	-2.598	228	236	4
3227	170	PREDICTED: uncharacterized protein At1g03900 isoform 1 [Vitis vinifera]	gi|225438091,gi|359480294	29884.8	0.169	SLPASTSSGSTK	50.6	44.9	7.6		561.784	1121.55	1122.56	2	-0.001982	-1.766	258	269	4
3227	170	PREDICTED: uncharacterized protein At1g03900 isoform 1 [Vitis vinifera]	gi|225438091,gi|359480294	29884.8	0.169	SPLPPPPNDPAAAR	38.8	44.4	9.99		700.368	1398.72	1399.73	2	-0.003922	-2.802	214	227	4
3227	170	hypothetical protein VITISV_027630 [Vitis vinifera]	gi|147791852,gi|225468761	33216.2	0.577	FEEKDGIDYAAVTVQLPGGER	49.9	45.4	10.9		765.383	2293.13	2294.13	3	0.004772	2.08	167	187	11
3227	170	hypothetical protein VITISV_027630 [Vitis vinifera]	gi|147791852,gi|225468761	33216.2	0.577	FGGEFLVPSYR	59.9	44	10.6		636.327	1270.64	1271.64	2	0.004738	3.726	206	216	11
3227	170	hypothetical protein VITISV_027630 [Vitis vinifera]	gi|147791852,gi|225468761	33216.2	0.577	GGSTGYDNAVALPAGGRGDEEELKK	60.6	44.8	9.46		831.072	2490.19	2491.21	3	-0.004268	-1.713	227	251	11
3227	170	hypothetical protein VITISV_027630 [Vitis vinifera]	gi|147791852,gi|225468761	33216.2	0.577	GTGTANQcPTIDGGVDSFAFK	85.7	42.5	11.3	c8: Carbamidomethyl (+57.02)	715	2141.98	2142.98	3	0.01063	4.959	86	106	11
3227	170	hypothetical protein VITISV_027630 [Vitis vinifera]	gi|147791852,gi|225468761	33216.2	0.577	ITLSVTK	37.5	38.9	4.13		381.242	760.47	761.477	2	0.0006781	0.8905	264	270	11
3227	170	hypothetical protein VITISV_027630 [Vitis vinifera]	gi|147791852,gi|225468761	33216.2	0.577	LTYDEIQSK	50.8	44	10.4		548.778	1095.54	1096.55	2	-0.003242	-2.956	71	79	11
3227	170	hypothetical protein VITISV_027630 [Vitis vinifera]	gi|147791852,gi|225468761	33216.2	0.577	NAPPEFQNTK	42.8	43.6	6.43		573.286	1144.56	1145.56	2	0.005218	4.555	132	141	11
3227	170	hypothetical protein VITISV_027630 [Vitis vinifera]	gi|147791852,gi|225468761	33216.2	0.577	QLVASGKPDK	42.1	44.4	6.32		521.8	1041.59	1042.59	2	0.003258	3.125	196	205	11
3227	170	hypothetical protein VITISV_027630 [Vitis vinifera]	gi|147791852,gi|225468761	33216.2	0.577	RLTYDEIQSK	40.6	44.4	7.75		626.832	1251.65	1252.65	2	0.002878	2.298	70	79	11
3227	170	hypothetical protein VITISV_027630 [Vitis vinifera]	gi|147791852,gi|225468761	33216.2	0.577	SKPETGEVIGVFESIQPSDTDLGAK	49.7	45.3	11.2		868.77	2603.29	2604.3	3	-0.007428	-2.852	271	295	11
3227	170	hypothetical protein VITISV_027630 [Vitis vinifera]	gi|147791852,gi|225468761	33216.2	0.577	VPFLFTIK	42.9	38.7	7.87		482.795	963.575	964.587	2	-0.004862	-5.04	188	195	11
3227	170	PREDICTED: isoflavone reductase homolog P3 [Vitis vinifera]	gi|225458243,gi|76559892	33788.2	0.344	EDDIGTYTIK	34.4	43.2	6.39		577.786	1153.56	1154.56	2	0.006858	5.94	191	200	10
3227	170	PREDICTED: isoflavone reductase homolog P3 [Vitis vinifera]	gi|225458243,gi|76559892	33788.2	0.344	ESTIADPVK	61.1	44.1	7.38		480.256	958.498	959.505	2	0.0004181	0.4357	37	45	10
3227	170	PREDICTED: isoflavone reductase homolog P3 [Vitis vinifera]	gi|225458243,gi|76559892	33788.2	0.344	FLPSEFGNDVDR	75.7	42.9	11		698.331	1394.65	1395.65	2	0.0002581	0.1849	108	119	10
3227	170	PREDICTED: isoflavone reductase homolog P3 [Vitis vinifera]	gi|225458243,gi|76559892	33788.2	0.344	FVVQASAK	46.3	43.5	3.9		425.245	848.476	849.483	2	0.0005981	0.704	19	26	10
3227	170	PREDICTED: isoflavone reductase homolog P3 [Vitis vinifera]	gi|225458243,gi|76559892	33788.2	0.344	IIAAIK	32.9	34.4	0.852		314.723	627.432	628.439	2	-2.194e-05	-0.03491	95	100	10
3227	170	PREDICTED: isoflavone reductase homolog P3 [Vitis vinifera]	gi|225458243,gi|76559892	33788.2	0.344	ILIIGGTGYIGK	60	37.7	10.9		602.87	1203.72	1204.73	2	0.001918	1.592	7	18	10
3227	170	PREDICTED: isoflavone reductase homolog P3 [Vitis vinifera]	gi|225458243,gi|76559892	33788.2	0.344	NSGVTLLHGDLYDHDSLVK	37.2	45.4	8.71		695.018	2082.03	2083.05	3	-0.005758	-2.764	54	72	10
3227	170	PREDICTED: isoflavone reductase homolog P3 [Vitis vinifera]	gi|225458243,gi|76559892	33788.2	0.344	SGHPTFALVR	42.4	42.9	4.85		362.203	1083.59	1084.59	3	0.005712	5.267	27	36	10
3227	170	PREDICTED: isoflavone reductase homolog P3 [Vitis vinifera]	gi|225458243,gi|76559892	33788.2	0.344	VIILGDGNPK	58.5	41	10.1		513.301	1024.59	1025.6	2	-0.005122	-4.994	176	185	10
3227	170	PREDICTED: isoflavone reductase homolog P3 [Vitis vinifera]	gi|225458243,gi|76559892	33788.2	0.344	VYVPEEQVLK	13.2	44.9	4.59		602.336	1202.66	1203.66	2	0.001998	1.66	241	250	10
1128	171	unnamed protein product [Vitis vinifera]	gi|297737108,gi|359477561,gi|363805401	24908.5	0.264	DQNDSWIR	23.4	40.8	4.28		517.238	1032.46	1033.47	2	-0.0002419	-0.2341	132	139	6
1128	171	unnamed protein product [Vitis vinifera]	gi|297737108,gi|359477561,gi|363805401	24908.5	0.264	FTLDSNNYIK	43.1	43.5	8.51		607.808	1213.6	1214.61	2	0.003538	2.913	158	167	6
1128	171	unnamed protein product [Vitis vinifera]	gi|297737108,gi|359477561,gi|363805401	24908.5	0.264	LDADNYETDEELKK	49.3	42.9	9.79		561.598	1681.77	1682.78	3	0.004202	2.497	64	77	6
1128	171	unnamed protein product [Vitis vinifera]	gi|297737108,gi|359477561,gi|363805401	24908.5	0.264	LGVLSWR	48.6	44.9	3.69		415.751	829.487	830.488	2	0.006178	7.439	57	63	6
1128	171	unnamed protein product [Vitis vinifera]	gi|297737108,gi|359477561,gi|363805401	24908.5	0.264	LPNYEEK	34.7	43.9	1.83		446.724	891.434	892.441	2	0.0001181	0.1323	97	103	6
1128	171	unnamed protein product [Vitis vinifera]	gi|297737108,gi|359477561,gi|363805401	24908.5	0.264	QEYLEAFGQK	43.5	43.4	7.17		606.799	1211.58	1212.59	2	0.0002181	0.1798	192	201	6
1128	171	PREDICTED: UPF0308 protein At2g37240, chloroplastic [Vitis vinifera]	gi|225439771	27541	0.0669	ADLLASQK	48.2	46.5	5.05		423.239	844.464	845.473	2	-0.001922	-2.273	118	125	2
1128	171	PREDICTED: UPF0308 protein At2g37240, chloroplastic [Vitis vinifera]	gi|225439771	27541	0.0669	QDWGLSFQR	27.1	44.4	3.89		568.779	1135.54	1136.55	2	0.001878	1.652	199	207	2
1128	171	hypothetical protein VITISV_025619 [Vitis vinifera]	gi|147789752,gi|297740188	30191.3	0.527	APDFEAEAVFDQEFIK	54.1	43.7	10.5		928.442	1854.87	1855.88	2	0.002038	1.098	86	101	12
1128	171	hypothetical protein VITISV_025619 [Vitis vinifera]	gi|147789752,gi|297740188	30191.3	0.527	ASEAPLVGNK	72.8	43.6	10.4		493.27	984.525	985.531	2	0.001398	1.419	76	85	12
1128	171	hypothetical protein VITISV_025619 [Vitis vinifera]	gi|147789752,gi|297740188	30191.3	0.527	EGIIQHATINNLAIGR	89.9	42.6	13.5		573.991	1718.95	1719.95	3	0.009132	5.309	210	225	12
1128	171	hypothetical protein VITISV_025619 [Vitis vinifera]	gi|147789752,gi|297740188	30191.3	0.527	LNTEILGVSIDSVFSHLAWVQTDR	105	44.3	14.9		900.808	2699.4	2700.4	3	0.01097	4.063	143	166	12
1128	171	hypothetical protein VITISV_025619 [Vitis vinifera]	gi|147789752,gi|297740188	30191.3	0.527	SGGLGDLK	50.3	45.5	4.78		373.707	745.399	746.404	2	0.001838	2.463	168	175	12
1128	171	hypothetical protein VITISV_025619 [Vitis vinifera]	gi|147789752,gi|297740188	30191.3	0.527	SGGLGDLKYPLVSDVTK	15.8	44.4	6.68		583.653	1747.94	1748.94	3	0.001052	0.6015	168	184	12
1128	171	hypothetical protein VITISV_025619 [Vitis vinifera]	gi|147789752,gi|297740188	30191.3	0.527	SVDETMR	33.6	41.8	0		419.192	836.37	837.377	2	-6.194e-05	-0.07397	226	232	12
1128	171	hypothetical protein VITISV_025619 [Vitis vinifera]	gi|147789752,gi|297740188	30191.3	0.527	SYDVLIPDQGVALR	59.5	45	10.1		515.948	1544.82	1545.83	3	0.002042	1.321	189	202	12
1128	171	hypothetical protein VITISV_025619 [Vitis vinifera]	gi|147789752,gi|297740188	30191.3	0.527	TLQALQYVQENPDEVcPAGWKPGEK	24.7	44.9	9.1	c16: Carbamidomethyl (+57.02)	953.133	2856.38	2857.38	3	0.0003068	0.1074	233	257	12
1128	171	hypothetical protein VITISV_025619 [Vitis vinifera]	gi|147789752,gi|297740188	30191.3	0.527	VTLSEYIGK	58	43.4	9.22		505.283	1008.55	1009.56	2	0.001358	1.345	102	110	12
1128	171	hypothetical protein VITISV_025619 [Vitis vinifera]	gi|147789752,gi|297740188	30191.3	0.527	YEEFEK	25.8	37.1	3.11		422.69	843.366	844.372	2	0.001278	1.514	137	142	12
1128	171	hypothetical protein VITISV_025619 [Vitis vinifera]	gi|147789752,gi|297740188	30191.3	0.527	YPLVSDVTK	49.2	43.1	8.55		511.282	1020.55	1021.56	2	0.0004181	0.4092	176	184	12
1128	171	hypothetical protein VITISV_016996 [Vitis vinifera]	gi|147819095,gi|147838865,gi|225458816,gi|359491968	29360.7	0.0909	DTIDLFVER	35.7	45.4	7.83		554.291	1106.57	1107.57	2	0.005858	5.289	102	110	2
1128	171	hypothetical protein VITISV_016996 [Vitis vinifera]	gi|147819095,gi|147838865,gi|225458816,gi|359491968	29360.7	0.0909	GFIFGPPIALAIGAK	61.3	40.4	10.9		736.44	1470.87	1471.87	2	0.005758	3.912	152	166	2
1128	171	VVTL1 [Vitis vinifera]	gi|2213852,gi|225426789	23951.5	0.252	APGGcNNPcTVFK	55.5	40.8	10.4	c5: Carbamidomethyl (+57.02), c9: Carbamidomethyl (+57.02)	711.322	1420.63	1421.63	2	0.006227	4.38	155	167	4
1128	171	VVTL1 [Vitis vinifera]	gi|2213852,gi|225426789	23951.5	0.252	TNEYccTDGPGScGPTTYSK	12.3	27.9	9.08	c5: Carbamidomethyl (+57.02), c6: Carbamidomethyl (+57.02), c13: Carbamidomethyl (+57.02)	752.296	2253.87	2254.87	3	0.004096	1.817	168	187	4
1128	171	VVTL1 [Vitis vinifera]	gi|2213852,gi|225426789	23951.5	0.252	TScTFDANGR	46.8	35.8	3.45	c3: Carbamidomethyl (+57.02)	564.737	1127.46	1128.47	2	-0.006587	-5.837	72	81	4
1128	171	VVTL1 [Vitis vinifera]	gi|2213852,gi|225426789	23951.5	0.252	TSLFTcPSGTNYK	64.2	42.5	11.4	c6: Carbamidomethyl (+57.02)	738.347	1474.68	1475.68	2	0.003153	2.136	205	217	4
1128	171	PREDICTED: uncharacterized protein LOC100255995 [Vitis vinifera]	gi|225444677	21099.4	0.132	LNLQPHPEGGFFSETLR	56	45.3	8.7		648.003	1940.99	1941.98	3	0.01112	5.727	11	27	2
1128	171	PREDICTED: uncharacterized protein LOC100255995 [Vitis vinifera]	gi|225444677	21099.4	0.132	SILPSEYK	47	43.6	4.49		468.755	935.495	936.504	2	-0.001802	-1.924	36	43	2
1128	171	hypothetical protein VITISV_027630 [Vitis vinifera]	gi|147791852,gi|225468761	33216.2	0.205	DGIDYAAVTVQLPGGER	40.4	45.5	8.89		587.635	1759.88	1760.88	3	0.009342	5.305	171	187	5
1128	171	hypothetical protein VITISV_027630 [Vitis vinifera]	gi|147791852,gi|225468761	33216.2	0.205	FEEKDGIDYAAVTVQLPGGER	76.4	45.4	13.2		765.383	2293.13	2294.13	3	0.004652	2.028	167	187	5
1128	171	hypothetical protein VITISV_027630 [Vitis vinifera]	gi|147791852,gi|225468761	33216.2	0.205	RLTYDEIQSK	21.9	44.7	4.68		418.223	1251.65	1252.65	3	0.0002021	0.1613	70	79	5
1128	171	hypothetical protein VITISV_027630 [Vitis vinifera]	gi|147791852,gi|225468761	33216.2	0.205	SKPETGEVIGVFESIQPSDTDLGAK	49.7	45.4	9.08		868.776	2603.31	2604.3	3	0.008502	3.265	271	295	5
1128	171	hypothetical protein VITISV_027630 [Vitis vinifera]	gi|147791852,gi|225468761	33216.2	0.205	VPFLFTIK	29.4	39.4	5.94		482.798	963.58	964.587	2	0.0008981	0.931	188	195	5
1128	171	PREDICTED: phosphoglycerate kinase, cytosolic [Vitis vinifera]	gi|225464999,gi|297736145	42405.8	0.0623	GVSLLLPADVVIADK	18.3	38.6	7.48		755.453	1508.89	1509.89	2	0.01044	6.913	262	276	2
1128	171	PREDICTED: phosphoglycerate kinase, cytosolic [Vitis vinifera]	gi|225464999,gi|297736145	42405.8	0.0623	TFGESLDTTK	54.4	42.5	9.74		549.772	1097.53	1098.53	2	0.005118	4.659	307	316	2
1128	171	PREDICTED: RNA-binding protein 8A [Vitis vinifera]	gi|225431497	22295.2	0.0743	DFDSLDSDGGPGPQR	47.6	37.6	11.4		781.841	1561.67	1562.67	2	0.001498	0.9587	79	93	1
1231	172	PREDICTED: ran-binding protein 1 homolog c [Vitis vinifera]	gi|225439378	24292.7	0.204	FASVENcK	65.9	41.6	6.55	c7: Carbamidomethyl (+57.02)	477.723	953.43	954.435	2	0.002813	2.947	138	145	2
1231	172	PREDICTED: ran-binding protein 1 homolog c [Vitis vinifera]	gi|225439378	24292.7	0.204	REEEDAPAGEDEDTGAQVAPIVK	77.9	43.5	14.8		809.381	2425.12	2426.13	3	-0.003758	-1.549	9	31	2
1231	172	PREDICTED: ran-binding protein 1 homolog c [Vitis vinifera]	gi|225439378	24292.7	0.204	TEDKGQEEGSLATK	58	43.8	10.2		498.241	1491.7	1492.71	3	-0.004098	-2.745	184	197	2
1231	172	PREDICTED: heat shock cognate 70 kDa protein isoform 2 [Vitis vinifera]	gi|359486799	71154.1	0.0292	ELESIcNPIIAK	54.7	45	8.75	c6: Carbamidomethyl (+57.02)	693.867	1385.72	1386.73	2	-0.002127	-1.534	604	615	2
1231	172	PREDICTED: heat shock cognate 70 kDa protein isoform 2 [Vitis vinifera]	gi|359486799	71154.1	0.0292	ITITNDK	53.6	44.5	4.25		402.728	803.441	804.446	2	0.002098	2.608	507	513	2
1231	172	hypothetical protein VITISV_037176 [Vitis vinifera]	gi|147839059,gi|225429209	57856.8	0.0391	LALISDELYEAAK	57.6	45.3	10.8		718.388	1434.76	1435.77	2	-0.0003819	-0.266	234	246	2
1231	172	hypothetical protein VITISV_037176 [Vitis vinifera]	gi|147839059,gi|225429209	57856.8	0.0391	NDILEPK	31.1	40.7	3.8		414.726	827.438	828.446	2	-0.001582	-1.91	280	286	2
1231	172	hypothetical protein VITISV_025619 [Vitis vinifera]	gi|147789752,gi|297740188	30191.3	0.15	EGIIQHATINNLAIGR	14.7	42.9	5.35		573.989	1718.95	1719.95	3	0.002682	1.559	210	225	2
1231	172	hypothetical protein VITISV_025619 [Vitis vinifera]	gi|147789752,gi|297740188	30191.3	0.15	VTLSEYIGK	57.5	43.5	9.17		505.283	1008.55	1009.56	2	0.002418	2.395	102	110	2
1231	172	hypothetical protein VITISV_031287 [Vitis vinifera]	gi|147857734,gi|225463428,gi|225463432	27933.8	0.106	APSGSPWYGPDR	55.5	40.6	10.9		645.297	1288.58	1289.59	2	-0.003902	-3.026	42	53	3
1231	172	hypothetical protein VITISV_031287 [Vitis vinifera]	gi|147857734,gi|225463428,gi|225463432	27933.8	0.106	ELEVIHcR	45.4	43.2	1.67	c7: Carbamidomethyl (+57.02)	352.515	1054.52	1055.53	3	-0.001063	-1.007	95	102	3
1231	172	hypothetical protein VITISV_031287 [Vitis vinifera]	gi|147857734,gi|225463428,gi|225463432	27933.8	0.106	FGEAVWFK	45.8	43.2	11.2		492.252	982.49	983.499	2	-0.001542	-1.568	124	131	3
1231	172	PREDICTED: ran-binding protein 1 homolog c [Vitis vinifera]	gi|225429578	24561.8	0.236	EAASASAEVEK	82.7	43.4	10.9		546.264	1090.51	1091.52	2	-0.0001019	-0.09339	197	207	6
1231	172	PREDICTED: ran-binding protein 1 homolog c [Vitis vinifera]	gi|225429578	24561.8	0.236	EKIEEIAESLEK	73.1	45.5	11.9		709.377	1416.74	1417.74	2	0.004318	3.046	155	166	6
1231	172	PREDICTED: ran-binding protein 1 homolog c [Vitis vinifera]	gi|225429578	24561.8	0.236	FASVENcK	65.9	41.6	6.55	c7: Carbamidomethyl (+57.02)	477.723	953.43	954.435	2	0.002813	2.947	144	151	6
1231	172	PREDICTED: ran-binding protein 1 homolog c [Vitis vinifera]	gi|225429578	24561.8	0.236	IEEIAESLEK	41.5	45.4	11.4		580.808	1159.6	1160.6	2	0.003018	2.6	157	166	6
1231	172	PREDICTED: ran-binding protein 1 homolog c [Vitis vinifera]	gi|225429578	24561.8	0.236	LNVGESKDEEGTK	23.8	44.3	6.39		703.343	1404.67	1405.68	2	-0.002002	-1.424	184	196	6
1231	172	PREDICTED: ran-binding protein 1 homolog c [Vitis vinifera]	gi|225429578	24561.8	0.236	SATDLLEK	37.6	45.8	2.9		438.738	875.461	876.467	2	0.0008381	0.9562	176	183	6
1231	172	unnamed protein product [Vitis vinifera]	gi|302144105,gi|359483345	46212.6	0.159	EPSVTFLVAK	53.2	43.9	5.35		545.81	1089.61	1090.61	2	-0.002022	-1.854	99	108	6
1231	172	unnamed protein product [Vitis vinifera]	gi|302144105,gi|359483345	46212.6	0.159	EPVFSFWLNR	46.9	45	7.4		647.833	1293.65	1294.66	2	0.001798	1.389	140	149	6
1231	172	unnamed protein product [Vitis vinifera]	gi|302144105,gi|359483345	46212.6	0.159	GEHTYVPVTQK	29.2	44.6	4.08		420.218	1257.63	1258.64	3	-0.003088	-2.453	171	181	6
1231	172	unnamed protein product [Vitis vinifera]	gi|302144105,gi|359483345	46212.6	0.159	NQEFIEATR	38.5	44.3	7.94		554.274	1106.53	1107.54	2	-0.002222	-2.006	90	98	6
1231	172	unnamed protein product [Vitis vinifera]	gi|302144105,gi|359483345	46212.6	0.159	SADIHYGTGAISGFFSEDNVK	44	43.5	11.9		739.018	2214.03	2215.03	3	0.008802	3.974	62	82	6
1231	172	unnamed protein product [Vitis vinifera]	gi|302144105,gi|359483345	46212.6	0.159	VGDLVVK	34.3	45.2	6.33		365.228	728.442	729.451	2	-0.001682	-2.306	83	89	6
1231	172	unnamed protein product [Vitis vinifera]	gi|296083911,gi|359479299	27656	0.383	AITFSDLHTEAGLK	50.9	45.6	10.2		501.6	1501.78	1502.79	3	-0.0002079	-0.1384	2	15	8
1231	172	unnamed protein product [Vitis vinifera]	gi|296083911,gi|359479299	27656	0.383	AVGVSLGcQAAPVEAAPK	71.2	45.1	9.64	c8: Carbamidomethyl (+57.02)	862.953	1723.89	1724.9	2	-0.001607	-0.9318	73	90	8
1231	172	unnamed protein product [Vitis vinifera]	gi|296083911,gi|359479299	27656	0.383	AYISGGHLTK	33.3	45.7	7.59		523.787	1045.56	1046.56	2	0.002698	2.578	25	34	8
1231	172	unnamed protein product [Vitis vinifera]	gi|296083911,gi|359479299	27656	0.383	KLEEAVR	32.9	45.7	-0.655		422.748	843.481	844.489	2	-0.0008619	-1.021	155	161	8
1231	172	unnamed protein product [Vitis vinifera]	gi|296083911,gi|359479299	27656	0.383	LAPVGYGIK	47.9	42.6	5.82		459.277	916.539	917.546	2	0.0008781	0.957	175	183	8
1231	172	unnamed protein product [Vitis vinifera]	gi|296083911,gi|359479299	27656	0.383	SIEmPGLLWGASK	53.5	45.7	11.5	m4: Oxidation (+15.99)	702.861	1403.71	1404.72	2	-0.004877	-3.472	162	174	8
1231	172	unnamed protein product [Vitis vinifera]	gi|296083911,gi|359479299	27656	0.383	SLDEFLSGK	54.1	43.4	4.67		498.257	994.498	995.505	2	0.001078	1.083	16	24	8
1231	172	unnamed protein product [Vitis vinifera]	gi|296083911,gi|359479299	27656	0.383	SSVLLDVKPWDDETDMK	44.4	44.4	0		659.987	1976.94	1977.95	3	-0.002258	-1.142	138	154	8
1231	172	PREDICTED: 14-3-3-like protein D-like [Vitis vinifera]	gi|225461654	28847.3	0.327	AYQTASTTAESDLSPTHPIR	57.3	44.7	10.1		716.017	2145.03	2146.04	3	-0.005578	-2.599	150	169	5
1231	172	PREDICTED: 14-3-3-like protein D-like [Vitis vinifera]	gi|225461654	28847.3	0.327	DSTLImQLLR	56.6	45.2	8.89	m6: Oxidation (+15.99)	603.334	1204.65	1205.66	2	0.004363	3.619	215	224	5
1231	172	PREDICTED: 14-3-3-like protein D-like [Vitis vinifera]	gi|225461654	28847.3	0.327	ENFVYIAK	46.5	43.5	7.3		492.264	982.514	983.52	2	0.001558	1.584	4	11	5
1231	172	PREDICTED: 14-3-3-like protein D-like [Vitis vinifera]	gi|225461654	28847.3	0.327	ILSSIEQK	48	44.4	5.12		459.269	916.522	917.53	2	-0.0007019	-0.765	61	68	5
1231	172	PREDICTED: 14-3-3-like protein D-like [Vitis vinifera]	gi|225461654	28847.3	0.327	NLLSVGYK	41.4	42.1	4.53		447.258	892.502	893.509	2	-0.0001019	-0.1141	42	49	5
1231	172	PREDICTED: 14-3-3-like protein D-like [Vitis vinifera]	gi|225461654	28847.3	0.327	QAFDEAISELDTLSEESYK	35.7	43	9.93		725.674	2174	2175	3	0.01042	4.792	196	214	5
1231	172	PREDICTED: 14-3-3-like protein D-like [Vitis vinifera]	gi|225461654	28847.3	0.327	YDEmVDAmKK	25.6	38	5.7	m4: Oxidation (+15.99), m8: Oxidation (+15.99)	421.186	1260.54	1261.54	3	-0.000448	-0.3551	19	28	5
1231	172	PREDICTED: 5'-methylthioadenosine/S-adenosylhomocysteine nucleosidase 1 isoform 2 [Vitis vinifera]	gi|359475059	28258.8	0.162	IPIPVFDQYGIGLR	51.5	43.9	10.5		794.446	1586.88	1587.89	2	-0.005302	-3.339	141	154	4
1231	172	PREDICTED: 5'-methylthioadenosine/S-adenosylhomocysteine nucleosidase 1 isoform 2 [Vitis vinifera]	gi|359475059	28258.8	0.162	SDVAEEAMVAEAEK	54.3	41.5	0		739.838	1477.66	1478.67	2	0.001498	1.013	8	21	4
1231	172	PREDICTED: 5'-methylthioadenosine/S-adenosylhomocysteine nucleosidase 1 isoform 2 [Vitis vinifera]	gi|359475059	28258.8	0.162	VPVIFIK	54.2	41.6	4.54		408.274	814.534	815.539	2	0.002378	2.916	213	219	4
1231	172	PREDICTED: 5'-methylthioadenosine/S-adenosylhomocysteine nucleosidase 1 isoform 2 [Vitis vinifera]	gi|359475059	28258.8	0.162	VVDFINGK	40.2	44.1	6.28		446.25	890.485	891.494	2	-0.001682	-1.887	253	260	4
1231	172	hypothetical protein VITISV_003812 [Vitis vinifera]	gi|147843260,gi|225449110,gi|296086050	34272.2	0.125	EFLKDPSK	45.6	44.5	7.53		482.261	962.507	963.515	2	-0.0007419	-0.77	270	277	4
1231	172	hypothetical protein VITISV_003812 [Vitis vinifera]	gi|147843260,gi|225449110,gi|296086050	34272.2	0.125	EVSEEVAK	47.7	45.2	4.79		445.728	889.442	890.447	2	0.003158	3.547	100	107	4
1231	172	hypothetical protein VITISV_003812 [Vitis vinifera]	gi|147843260,gi|225449110,gi|296086050	34272.2	0.125	GTVEIITPVELIR	32	39.7	7.79		720.428	1438.84	1439.85	2	0.001018	0.7071	153	165	4
1231	172	hypothetical protein VITISV_003812 [Vitis vinifera]	gi|147843260,gi|225449110,gi|296086050	34272.2	0.125	VGSSEAALLAK	68	45.6	10.1		523.298	1044.58	1045.59	2	0.0008181	0.7824	170	180	4
1231	172	PREDICTED: 14-3-3 protein 4 [Vitis vinifera]	gi|225451995	29523.7	0.531	ATIEAELSK	40.4	46.3	5.04		481.262	960.509	961.52	2	-0.003542	-3.684	93	101	7
1231	172	PREDICTED: 14-3-3 protein 4 [Vitis vinifera]	gi|225451995	29523.7	0.531	DSTLImQLLR	56.6	45.2	8.89	m6: Oxidation (+15.99)	603.334	1204.65	1205.66	2	0.004363	3.619	222	231	7
1231	172	PREDICTED: 14-3-3 protein 4 [Vitis vinifera]	gi|225451995	29523.7	0.531	EAAESTLLAYK	63	44.6	10.6		598.314	1194.61	1195.62	2	-0.0002019	-0.1689	149	159	7
1231	172	PREDICTED: 14-3-3 protein 4 [Vitis vinifera]	gi|225451995	29523.7	0.531	EENVYMAK	58.6	42	0		492.23	982.445	983.45	2	0.002338	2.377	9	16	7
1231	172	PREDICTED: 14-3-3 protein 4 [Vitis vinifera]	gi|225451995	29523.7	0.531	GNEDHVAIIK	30.9	44.1	10.2		548.294	1094.57	1095.58	2	0.0008781	0.8015	80	89	7
1231	172	PREDICTED: 14-3-3 protein 4 [Vitis vinifera]	gi|225451995	29523.7	0.531	IcDGILSLLESHLIPSAVIAESK	16.8	42.4	11.2	c2: Carbamidomethyl (+57.02)	822.451	2464.33	2465.33	3	0.004817	1.954	102	124	7
1231	172	PREDICTED: 14-3-3 protein 4 [Vitis vinifera]	gi|225451995	29523.7	0.531	IISSIEQK	48	44.4	5.12		459.269	916.522	917.53	2	-0.0007019	-0.765	68	75	7
1231	172	PREDICTED: 14-3-3 protein 4 [Vitis vinifera]	gi|225451995	29523.7	0.531	MLLTESSR	47.4	45.2	0		468.746	935.478	936.482	2	0.002958	3.159	1	8	7
1231	172	PREDICTED: 14-3-3 protein 4 [Vitis vinifera]	gi|225451995	29523.7	0.531	NLLSVAYK	31.3	41.5	5.47		454.265	906.516	907.525	2	-0.0009419	-1.038	49	56	7
1231	172	PREDICTED: 14-3-3 protein 4 [Vitis vinifera]	gi|225451995	29523.7	0.531	SAQDIALAELAPTHPIR	64.3	44.2	12.4		901.993	1801.97	1802.98	2	0.003038	1.685	160	176	7
1231	172	PREDICTED: 14-3-3 protein 4 [Vitis vinifera]	gi|225451995	29523.7	0.531	TVEVEELTVEER	101	45.3	11.5		716.861	1431.71	1432.72	2	-0.002242	-1.565	37	48	7
1231	172	PREDICTED: 14-3-3 protein 4 [Vitis vinifera]	gi|225451995	29523.7	0.531	VFYLK	28	40.7	0		335.203	668.391	669.397	2	0.001538	2.298	125	129	7
1231	172	PREDICTED: 14-3-3 protein 4 [Vitis vinifera]	gi|225451995	29523.7	0.531	YEEMVEFMEK	57	36.4	0		667.786	1333.56	1334.56	2	0.0007381	0.553	24	33	7
1231	172	PREDICTED: 14-3-3-like protein [Vitis vinifera]	gi|225468983	28764.4	0.659	DNLTLWTSDmQDDGGDEIKEAPK	131	40.8	14.1	m10: Oxidation (+15.99)	865.391	2593.15	2594.16	3	0.000687	0.2648	229	251	9
1231	172	PREDICTED: 14-3-3-like protein [Vitis vinifera]	gi|225468983	28764.4	0.659	DSTLImQLLR	56.6	45.2	8.89	m6: Oxidation (+15.99)	603.334	1204.65	1205.66	2	0.004363	3.619	219	228	9
1231	172	PREDICTED: 14-3-3-like protein [Vitis vinifera]	gi|225468983	28764.4	0.659	EAAESTLAAYK	80	44.3	10.4		577.292	1152.57	1153.57	2	0.002658	2.304	146	156	9
1231	172	PREDICTED: 14-3-3-like protein [Vitis vinifera]	gi|225468983	28764.4	0.659	EENVYMAK	58.6	42	0		492.23	982.445	983.45	2	0.002338	2.377	8	15	9
1231	172	PREDICTED: 14-3-3-like protein [Vitis vinifera]	gi|225468983	28764.4	0.659	GNEDHVATIR	43.5	43.6	9.21		556.278	1110.54	1111.55	2	5.806e-05	0.05223	77	86	9
1231	172	PREDICTED: 14-3-3-like protein [Vitis vinifera]	gi|225468983	28764.4	0.659	IESELSSIcDGILR	66.3	45.7	11.2	c9: Carbamidomethyl (+57.02)	796.408	1590.8	1591.8	2	0.008253	5.185	92	105	9
1231	172	PREDICTED: 14-3-3-like protein [Vitis vinifera]	gi|225468983	28764.4	0.659	IISSIEQK	48	44.4	5.12		459.269	916.522	917.53	2	-0.0007019	-0.765	65	72	9
1231	172	PREDICTED: 14-3-3-like protein [Vitis vinifera]	gi|225468983	28764.4	0.659	KEAAESTLAAYK	82.1	44.3	8.28		641.336	1280.66	1281.67	2	-0.003082	-2.405	145	156	9
1231	172	PREDICTED: 14-3-3-like protein [Vitis vinifera]	gi|225468983	28764.4	0.659	LIPSATSGDSK	60.3	45.7	7.56		538.285	1074.56	1075.56	2	-0.0008619	-0.8014	111	121	9
1231	172	PREDICTED: 14-3-3-like protein [Vitis vinifera]	gi|225468983	28764.4	0.659	NLLSVAYK	31.3	41.5	5.47		454.265	906.516	907.525	2	-0.0009419	-1.038	46	53	9
1231	172	PREDICTED: 14-3-3-like protein [Vitis vinifera]	gi|225468983	28764.4	0.659	QAFDEAIAELDTLGEESYK	133	43.8	12.3		1065	2128	2128.99	2	0.01002	4.706	200	218	9
1231	172	PREDICTED: 14-3-3-like protein [Vitis vinifera]	gi|225468983	28764.4	0.659	SAQDIATVELAPTHPIR	100	44.7	9.54		606.996	1817.97	1818.97	3	0.001442	0.7928	157	173	9
1231	172	PREDICTED: 14-3-3-like protein [Vitis vinifera]	gi|225468983	28764.4	0.659	VFYLK	28	40.7	0		335.203	668.391	669.397	2	0.001538	2.298	122	126	9
1231	172	PREDICTED: 14-3-3-like protein [Vitis vinifera]	gi|225468983	28764.4	0.659	VTAEAEELTVEER	101	44.7	12.7		738.367	1474.72	1475.72	2	0.004858	3.292	33	45	9
1231	172	PREDICTED: 14-3-3-like protein [Vitis vinifera]	gi|225468983	28764.4	0.659	YEEmVQFMEK	47.7	37.7	0	m4: Oxidation (+15.99)	675.292	1348.57	1349.58	2	0.001963	1.455	23	32	9
1231	172	PREDICTED: 14-3-3 protein [Vitis vinifera]	gi|359492889	29327.1	0.662	DNLTLWTSDmQDDGADEIK	78.4	39.2	13.6	m10: Oxidation (+15.99)	728.322	2181.94	2182.95	3	0.007237	3.315	232	250	17
1231	172	PREDICTED: 14-3-3 protein [Vitis vinifera]	gi|359492889	29327.1	0.662	DNLTLWTSDMQDDGADEIKEAPK	110	41.4	0		864.728	2591.16	2592.18	3	-0.008248	-3.182	232	254	17
1231	172	PREDICTED: 14-3-3 protein [Vitis vinifera]	gi|359492889	29327.1	0.662	DSTLImQLLR	56.6	45.2	8.89	m6: Oxidation (+15.99)	603.334	1204.65	1205.66	2	0.004363	3.619	222	231	17
1231	172	PREDICTED: 14-3-3 protein [Vitis vinifera]	gi|359492889	29327.1	0.662	EAAESTLTAYK	90.6	43.5	11.7		592.293	1182.57	1183.58	2	-0.005782	-4.885	149	159	17
1231	172	PREDICTED: 14-3-3 protein [Vitis vinifera]	gi|359492889	29327.1	0.662	EENVYMAK	58.6	42	0		492.23	982.445	983.45	2	0.002338	2.377	9	16	17
1231	172	PREDICTED: 14-3-3 protein [Vitis vinifera]	gi|359492889	29327.1	0.662	GNEDHVAmIR	49.9	41.6	0	m8: Oxidation (+15.99)	386.519	1156.53	1157.54	3	0.004237	3.66	80	89	17
1231	172	PREDICTED: 14-3-3 protein [Vitis vinifera]	gi|359492889	29327.1	0.662	IESELSSIcDGILK	83.7	45.5	12.8	c9: Carbamidomethyl (+57.02)	782.402	1562.79	1563.79	2	0.002073	1.325	95	108	17
1231	172	PREDICTED: 14-3-3 protein [Vitis vinifera]	gi|359492889	29327.1	0.662	IISSIEQK	48	44.4	5.12		459.269	916.522	917.53	2	-0.0007019	-0.765	68	75	17
1231	172	PREDICTED: 14-3-3 protein [Vitis vinifera]	gi|359492889	29327.1	0.662	KEAAESTLTAYK	71.2	44.9	10.2		656.343	1310.67	1311.68	2	-0.001262	-0.9621	148	159	17
1231	172	PREDICTED: 14-3-3 protein [Vitis vinifera]	gi|359492889	29327.1	0.662	LIPSASSGDSK	57.2	45.9	7.5		531.277	1060.54	1061.55	2	-0.001162	-1.095	114	124	17
1231	172	PREDICTED: 14-3-3 protein [Vitis vinifera]	gi|359492889	29327.1	0.662	NLLSVAYK	31.3	41.5	5.47		454.265	906.516	907.525	2	-0.0009419	-1.038	49	56	17
1231	172	PREDICTED: 14-3-3 protein [Vitis vinifera]	gi|359492889	29327.1	0.662	QAFDEAIAELDTLGEESYK	133	43.8	12.3		1065	2128	2128.99	2	0.01002	4.706	203	221	17
1231	172	PREDICTED: 14-3-3 protein [Vitis vinifera]	gi|359492889	29327.1	0.662	SAQDIANAELAPTHPIR	99.9	45.3	12.1		601.981	1802.92	1803.93	3	-0.007068	-3.918	160	176	17
1231	172	PREDICTED: 14-3-3 protein [Vitis vinifera]	gi|359492889	29327.1	0.662	SKIESELSSIcDGILK	61	45.5	10.9	c11: Carbamidomethyl (+57.02)	593.647	1777.92	1778.92	3	0.005197	2.921	93	108	17
1231	172	PREDICTED: 14-3-3 protein [Vitis vinifera]	gi|359492889	29327.1	0.662	VFYLK	28	40.7	0		335.203	668.391	669.397	2	0.001538	2.298	125	129	17
1231	172	PREDICTED: 14-3-3 protein [Vitis vinifera]	gi|359492889	29327.1	0.662	VSAAVDSEELTVEER	118	43.9	13.5		817.394	1632.77	1633.79	2	-0.0112	-6.856	34	48	17
1231	172	PREDICTED: 14-3-3 protein [Vitis vinifera]	gi|359492889	29327.1	0.662	YEEMVEFMEK	57	36.4	0		667.786	1333.56	1334.56	2	0.0007381	0.553	24	33	17
3227	173	glutamine synthetase [Vitis vinifera]	gi|14161136,gi|147768273,gi|359473032,gi|359473034	38938.9	0.0393	TLSGPVTGPAQLPK	51	42.6	12.2		683.388	1364.76	1365.77	2	-0.004902	-3.589	39	52	1
3227	173	PREDICTED: hypersensitive-induced response protein 1 [Vitis vinifera]	gi|225424906,gi|296086429	31357.9	0.0944	AVEEELEK	44.8	44.1	5.36		473.737	945.459	946.473	2	-0.006362	-6.722	127	134	3
3227	173	PREDICTED: hypersensitive-induced response protein 1 [Vitis vinifera]	gi|225424906,gi|296086429	31357.9	0.0944	VGLLQAETAK	56.8	44.3	9.33		515.3	1028.58	1029.59	2	-0.001962	-1.906	276	285	3
3227	173	PREDICTED: hypersensitive-induced response protein 1 [Vitis vinifera]	gi|225424906,gi|296086429	31357.9	0.0944	YLAGLGIAR	42.9	42.4	6.75		467.283	932.551	933.552	2	0.006398	6.853	197	205	3
3227	173	unnamed protein product [Vitis vinifera]	gi|297734907,gi|359479424	39757.5	0.27	AVTEALLPcLLLSNSGR	52.5	44	11.2	c9: Carbamidomethyl (+57.02)	605.334	1812.98	1813.98	3	0.003537	1.95	213	229	4
3227	173	unnamed protein product [Vitis vinifera]	gi|297734907,gi|359479424	39757.5	0.27	GIGLEIcR	43.2	45.8	4.68	c7: Carbamidomethyl (+57.02)	459.246	916.477	917.487	2	-0.003127	-3.408	84	91	4
3227	173	unnamed protein product [Vitis vinifera]	gi|297734907,gi|359479424	39757.5	0.27	GLEAVAK	41.1	46.3	3.84		344.205	686.396	687.404	2	0.0001381	0.2008	110	116	4
3227	173	unnamed protein product [Vitis vinifera]	gi|297734907,gi|359479424	39757.5	0.27	GWPTQTSAYTISK	59.6	44.5	9.71		720.361	1438.71	1439.72	2	-0.002142	-1.488	283	295	4
3227	173	unnamed protein product [Vitis vinifera]	gi|297734907,gi|359479424	39757.5	0.27	IVNVSAGLGK	69.3	43.9	10.8		479.288	956.562	957.573	2	-0.003262	-3.406	230	239	4
3227	173	unnamed protein product [Vitis vinifera]	gi|297734907,gi|359479424	39757.5	0.27	LEFVSNER	36.5	45	6.31		497.255	992.496	993.5	2	0.003158	3.179	240	247	4
3227	173	unnamed protein product [Vitis vinifera]	gi|297734907,gi|359479424	39757.5	0.27	SITTLAK	37.5	35.3	2.48		367.227	732.439	733.446	2	0.0008581	1.17	137	143	4
3227	173	unnamed protein product [Vitis vinifera]	gi|297734907,gi|359479424	39757.5	0.27	VLTQTYELAEEcVK	73.1	45.1	10.8	c12: Carbamidomethyl (+57.02)	841.922	1681.83	1682.83	2	0.006033	3.585	192	205	4
3227	173	unnamed protein product [Vitis vinifera]	gi|297734907,gi|359479424	39757.5	0.27	VRmELNDVDVLSVER	47.7	45.7	9.37	m3: Oxidation (+15.99)	597.309	1788.91	1789.91	3	0.002407	1.345	248	262	4
3227	173	unnamed protein product [Vitis vinifera]	gi|297734906,gi|359479422	32971	0.438	cALVTGASK	48.1	45.8	10.1	c1: Carbamidomethyl (+57.02)	453.741	905.467	906.471	2	0.003173	3.5	13	21	11
3227	173	unnamed protein product [Vitis vinifera]	gi|297734906,gi|359479422	32971	0.438	FIVTR	35	42.2	0		318.199	634.383	635.388	2	0.002778	4.372	82	86	11
3227	173	unnamed protein product [Vitis vinifera]	gi|297734906,gi|359479422	32971	0.438	GIGLEIcR	43.2	45.8	4.68	c7: Carbamidomethyl (+57.02)	459.246	916.477	917.487	2	-0.003127	-3.408	22	29	11
3227	173	unnamed protein product [Vitis vinifera]	gi|297734906,gi|359479422	32971	0.438	GLEAVAK	41.1	46.3	3.84		344.205	686.396	687.404	2	0.0001381	0.2008	48	54	11
3227	173	unnamed protein product [Vitis vinifera]	gi|297734906,gi|359479422	32971	0.438	GWPTQTSAYTISK	59.6	44.5	9.71		720.361	1438.71	1439.72	2	-0.002142	-1.488	221	233	11
3227	173	unnamed protein product [Vitis vinifera]	gi|297734906,gi|359479422	32971	0.438	LDEIVNEFLNDVK	44.1	45.6	10.6		516.604	1546.79	1547.8	3	0.002372	1.533	201	213	11
3227	173	unnamed protein product [Vitis vinifera]	gi|297734906,gi|359479422	32971	0.438	LDEIVNEFLNDVKEDR	80.2	45.3	13		649.993	1946.96	1947.97	3	-0.002258	-1.159	201	216	11
3227	173	unnamed protein product [Vitis vinifera]	gi|297734906,gi|359479422	32971	0.438	SITTLAK	37.5	35.3	2.48		367.227	732.439	733.446	2	0.0008581	1.17	75	81	11
3227	173	unnamed protein product [Vitis vinifera]	gi|297734906,gi|359479422	32971	0.438	SYPSLLINcVcPGFVK	40.8	45.4	9.7	c9: Carbamidomethyl (+57.02), c11: Carbamidomethyl (+57.02)	927.472	1852.93	1853.93	2	0.006887	3.715	246	261	11
3227	173	unnamed protein product [Vitis vinifera]	gi|297734906,gi|359479422	32971	0.438	TDINSNTGFFPVEVGAK	53.9	45.3	8.87		599.301	1794.88	1795.89	3	0.001272	0.7083	262	278	11
3227	173	unnamed protein product [Vitis vinifera]	gi|297734906,gi|359479422	32971	0.438	VRmELNDVDVLSVER	47.7	45.7	9.37	m3: Oxidation (+15.99)	597.309	1788.91	1789.91	3	0.002407	1.345	186	200	11
3227	173	PREDICTED: tubulin beta-1 chain [Vitis vinifera]	gi|225440131	50228.2	0.0224	LAVNLIPFPR	60.3	37.7	12.4		570.355	1138.7	1139.69	2	0.009958	8.737	253	262	1
3227	173	PREDICTED: probable lactoylglutathione lyase, chloroplast-like isoform 1 [Vitis vinifera]	gi|225445150,gi|359484559	39387.7	0.0789	EPGPLPGINTK	40.1	44.3	5.53		561.81	1121.6	1122.62	2	-0.003622	-3.226	320	330	3
3227	173	PREDICTED: probable lactoylglutathione lyase, chloroplast-like isoform 1 [Vitis vinifera]	gi|225445150,gi|359484559	39387.7	0.0789	SVFVDNIDFLK	45.3	43.8	10.5		648.851	1295.69	1296.68	2	0.01114	8.59	342	352	3
3227	173	PREDICTED: probable lactoylglutathione lyase, chloroplast-like isoform 1 [Vitis vinifera]	gi|225445150,gi|359484559	39387.7	0.0789	VGDLDR	38.3	44.7	0		337.678	673.341	674.347	2	0.001778	2.637	231	236	3
3227	173	PREDICTED: 3-oxoacyl-[acyl-carrier-protein] reductase, chloroplastic [Vitis vinifera]	gi|225425854	33968	0.0727	AIALALGK	42.5	39.5	7.93		378.752	755.489	756.498	2	-0.001642	-2.17	102	109	3
3227	173	PREDICTED: 3-oxoacyl-[acyl-carrier-protein] reductase, chloroplastic [Vitis vinifera]	gi|225425854	33968	0.0727	ILETIPLGR	46.4	37.6	6.04		506.313	1010.61	1011.62	2	-0.001262	-1.247	286	294	3
3227	173	PREDICTED: 3-oxoacyl-[acyl-carrier-protein] reductase, chloroplastic [Vitis vinifera]	gi|225425854	33968	0.0727	VLVNYAR	31.1	43.7	1.88		417.744	833.474	834.483	2	-0.001562	-1.872	114	120	3
3227	173	unnamed protein product [Vitis vinifera]	gi|302142119,gi|359492516	9561.5	0.238	HFPGTLTAIR	21	42.5	4.04		556.814	1111.61	1112.62	2	-6.194e-05	-0.05567	33	42	2
3227	173	unnamed protein product [Vitis vinifera]	gi|302142119,gi|359492516	9561.5	0.238	IVAISLDDPR	94.8	42.6	11.3		549.813	1097.61	1098.62	2	0.003998	3.639	11	20	2
3227	173	PREDICTED: probable protein phosphatase 2C 59 [Vitis vinifera]	gi|225430569	31378	0.377	DAGSTASTAILVGDR	110	45.9	12.6		717.368	1432.72	1433.72	2	0.006058	4.225	123	137	10
3227	173	PREDICTED: probable protein phosphatase 2C 59 [Vitis vinifera]	gi|225430569	31378	0.377	FLANQGGSSLSSPA	66	44.9	10.4		668.328	1334.64	1335.65	2	-0.005222	-3.91	279	292	10
3227	173	PREDICTED: probable protein phosphatase 2C 59 [Vitis vinifera]	gi|225430569	31378	0.377	FSYGYASSPGK	69.4	41.3	11.5		582.271	1162.53	1163.54	2	-0.001302	-1.119	32	42	10
3227	173	PREDICTED: probable protein phosphatase 2C 59 [Vitis vinifera]	gi|225430569	31378	0.377	GGNAIAVSR	36.4	46	4.78		422.737	843.459	844.463	2	0.003118	3.692	153	161	10
3227	173	PREDICTED: probable protein phosphatase 2C 59 [Vitis vinifera]	gi|225430569	31378	0.377	GSADNITcVVVR	32.5	45.1	5.15	c8: Carbamidomethyl (+57.02)	645.828	1289.64	1290.65	2	0.002213	1.714	267	278	10
3227	173	PREDICTED: probable protein phosphatase 2C 59 [Vitis vinifera]	gi|225430569	31378	0.377	QNLFSNLIR	44.9	44	5.24		552.816	1103.62	1104.62	2	0.008818	7.983	82	90	10
3227	173	PREDICTED: probable protein phosphatase 2C 59 [Vitis vinifera]	gi|225430569	31378	0.377	QYVVADPEIQEEK	52.5	44.1	9.91		774.379	1546.74	1547.76	2	-0.008902	-5.752	206	218	10
3227	173	PREDICTED: probable protein phosphatase 2C 59 [Vitis vinifera]	gi|225430569	31378	0.377	SAIADAYK	48.5	44.3	4.23		419.719	837.423	838.431	2	-0.0001019	-0.1216	100	107	10
3227	173	PREDICTED: probable protein phosphatase 2C 59 [Vitis vinifera]	gi|225430569	31378	0.377	SSmEDFYETR	63.1	33	9.92	m3: Oxidation (+15.99)	640.76	1279.51	1280.51	2	0.003843	3.001	44	53	10
3227	173	PREDICTED: probable protein phosphatase 2C 59 [Vitis vinifera]	gi|225430569	31378	0.377	VGGVLAVSR	54.1	43.9	5.4		429.265	856.515	857.52	2	0.001598	1.864	189	197	10
3227	173	PREDICTED: chorismate mutase, chloroplastic [Vitis vinifera]	gi|225452920	36400.7	0.159	EVQVAYLLR	50.6	44.2	8.32		545.813	1089.61	1090.63	2	-0.007102	-6.512	309	317	5
3227	173	PREDICTED: chorismate mutase, chloroplastic [Vitis vinifera]	gi|225452920	36400.7	0.159	FQASPDAYEAAIK	31.2	44.3	9.4		705.848	1409.68	1410.69	2	-0.001762	-1.249	227	239	5
3227	173	PREDICTED: chorismate mutase, chloroplastic [Vitis vinifera]	gi|225452920	36400.7	0.159	LHAQVGR	28.8	39.5	1.52		390.728	779.442	780.447	2	0.001878	2.406	130	136	5
3227	173	PREDICTED: chorismate mutase, chloroplastic [Vitis vinifera]	gi|225452920	36400.7	0.159	LMDmLTYQR	29.1	41.5	0	m4: Oxidation (+15.99)	593.782	1185.55	1186.56	2	-0.003417	-2.88	246	254	5
3227	173	PREDICTED: chorismate mutase, chloroplastic [Vitis vinifera]	gi|225452920	36400.7	0.159	VDESQNLTLDAIR	98.8	45.4	14.2		737.382	1472.75	1473.75	2	0.001878	1.274	66	78	5
3227	173	hypothetical protein VITISV_027630 [Vitis vinifera]	gi|147791852,gi|225468761	33216.2	0.641	DGIDYAAVTVQLPGGER	100	45.4	13.4		880.947	1759.88	1760.88	2	0.004638	2.634	171	187	18
3227	173	hypothetical protein VITISV_027630 [Vitis vinifera]	gi|147791852,gi|225468761	33216.2	0.641	ENIKDASSSTGK	59.2	44.6	8.01		618.806	1235.6	1236.61	2	-0.002102	-1.7	252	263	18
3227	173	hypothetical protein VITISV_027630 [Vitis vinifera]	gi|147791852,gi|225468761	33216.2	0.641	FEEKDGIDYAAVTVQLPGGER	54.2	45.1	11.3		765.38	2293.12	2294.13	3	-0.005638	-2.458	167	187	18
3227	173	hypothetical protein VITISV_027630 [Vitis vinifera]	gi|147791852,gi|225468761	33216.2	0.641	FGGEFLVPSYR	63.9	44	10.8		636.329	1270.64	1271.64	2	0.008238	6.478	206	216	18
3227	173	hypothetical protein VITISV_027630 [Vitis vinifera]	gi|147791852,gi|225468761	33216.2	0.641	GDEEELKKENIK	32.5	45.4	4.29		477.916	1430.73	1431.73	3	0.0008121	0.5672	244	255	18
3227	173	hypothetical protein VITISV_027630 [Vitis vinifera]	gi|147791852,gi|225468761	33216.2	0.641	GGSTGYDNAVALPAGGR	86.1	44.7	10.5		781.883	1561.75	1562.76	2	0.003358	2.149	227	243	18
3227	173	hypothetical protein VITISV_027630 [Vitis vinifera]	gi|147791852,gi|225468761	33216.2	0.641	GGSTGYDNAVALPAGGRGDEEELKK	63.1	45	10.2		831.075	2490.2	2491.21	3	0.004042	1.623	227	251	18
3227	173	hypothetical protein VITISV_027630 [Vitis vinifera]	gi|147791852,gi|225468761	33216.2	0.641	GSSFLDPK	30.3	44.3	1.75		425.719	849.423	850.431	2	-0.0003419	-0.4021	217	224	18
3227	173	hypothetical protein VITISV_027630 [Vitis vinifera]	gi|147791852,gi|225468761	33216.2	0.641	GTGTANQcPTIDGGVDSFAFK	126	41.8	12.3	c8: Carbamidomethyl (+57.02)	1071.99	2141.96	2142.98	2	-0.004447	-2.075	86	106	18
3227	173	hypothetical protein VITISV_027630 [Vitis vinifera]	gi|147791852,gi|225468761	33216.2	0.641	IQGFWYGQLES	22.9	43.2	4.53		664.32	1326.63	1327.63	2	0.001258	0.9476	302	312	18
3227	173	hypothetical protein VITISV_027630 [Vitis vinifera]	gi|147791852,gi|225468761	33216.2	0.641	ITLSVTK	40.2	38.9	4.51		381.242	760.469	761.477	2	-0.0006219	-0.8168	264	270	18
3227	173	hypothetical protein VITISV_027630 [Vitis vinifera]	gi|147791852,gi|225468761	33216.2	0.641	LTYDEIQSK	40.5	44.4	9.15		548.78	1095.55	1096.55	2	0.0007781	0.7095	71	79	18
3227	173	hypothetical protein VITISV_027630 [Vitis vinifera]	gi|147791852,gi|225468761	33216.2	0.641	LTYTLDEIEGPFEVSSDGTVK	39.8	45.3	10.2		1150.57	2299.13	2300.12	2	0.0146	6.347	146	166	18
3227	173	hypothetical protein VITISV_027630 [Vitis vinifera]	gi|147791852,gi|225468761	33216.2	0.641	NAPPEFQNTK	58.7	42.4	7.78		573.281	1144.55	1145.56	2	-0.004582	-4	132	141	18
3227	173	hypothetical protein VITISV_027630 [Vitis vinifera]	gi|147791852,gi|225468761	33216.2	0.641	QLVASGKPDK	66.2	44.4	9.07		521.799	1041.58	1042.59	2	0.002278	2.185	196	205	18
3227	173	hypothetical protein VITISV_027630 [Vitis vinifera]	gi|147791852,gi|225468761	33216.2	0.641	RLTYDEIQSK	55.8	44.6	8.22		626.83	1251.65	1252.65	2	-0.0005419	-0.4326	70	79	18
3227	173	hypothetical protein VITISV_027630 [Vitis vinifera]	gi|147791852,gi|225468761	33216.2	0.641	SKPETGEVIGVFESIQPSDTDLGAK	90.7	45.3	10.7		868.776	2603.31	2604.3	3	0.009582	3.679	271	295	18
3227	173	hypothetical protein VITISV_027630 [Vitis vinifera]	gi|147791852,gi|225468761	33216.2	0.641	VPFLFTIK	34.6	36.2	7.77		482.801	963.588	964.587	2	0.008298	8.603	188	195	18
3227	173	PREDICTED: uncharacterized protein LOC100265416 [Vitis vinifera]	gi|225431810	35106.1	0.0584	SEIPSYIK	33.6	44.4	4.03		468.759	935.503	936.504	2	0.006418	6.853	173	180	2
3227	173	PREDICTED: uncharacterized protein LOC100265416 [Vitis vinifera]	gi|225431810	35106.1	0.0584	YSDEEFLQIR	58.2	42.6	11.1		650.314	1298.61	1299.62	2	-0.0009619	-0.7402	210	219	2
3227	173	PREDICTED: isoflavone reductase homolog P3 [Vitis vinifera]	gi|225458243,gi|76559892	33788.2	0.221	ESTIADPVK	55.3	44.7	6.05		480.255	958.496	959.505	2	-0.001022	-1.065	37	45	6
3227	173	PREDICTED: isoflavone reductase homolog P3 [Vitis vinifera]	gi|225458243,gi|76559892	33788.2	0.221	FLPSEFGNDVDR	56.7	43.3	10.5		698.333	1394.65	1395.65	2	0.004498	3.223	108	119	6
3227	173	PREDICTED: isoflavone reductase homolog P3 [Vitis vinifera]	gi|225458243,gi|76559892	33788.2	0.221	NSGVTLLHGDLYDHDSLVK	55.6	45.5	11.6		695.021	2082.04	2083.05	3	0.002042	0.9803	54	72	6
3227	173	PREDICTED: isoflavone reductase homolog P3 [Vitis vinifera]	gi|225458243,gi|76559892	33788.2	0.221	VIILGDGNPK	43.2	41.6	6.98		513.304	1024.59	1025.6	2	0.001418	1.383	176	185	6
3227	173	PREDICTED: isoflavone reductase homolog P3 [Vitis vinifera]	gi|225458243,gi|76559892	33788.2	0.221	VNAVEPAK	52.5	40.1	7.32		414.236	826.457	827.462	2	0.001798	2.173	120	127	6
3227	173	PREDICTED: isoflavone reductase homolog P3 [Vitis vinifera]	gi|225458243,gi|76559892	33788.2	0.221	VYVPEEQVLK	18.1	45.2	6.09		602.338	1202.66	1203.66	2	0.006718	5.581	241	250	6
3227	173	hypothetical protein VITISV_028800 [Vitis vinifera]	gi|147805616,gi|225432802	27155.9	0.273	DRGPYPADQVVR	27.9	44.6	9.63		458.237	1371.69	1372.7	3	0.0002521	0.1836	114	125	5
3227	173	hypothetical protein VITISV_028800 [Vitis vinifera]	gi|147805616,gi|225432802	27155.9	0.273	FAFVLYDSSNR	56.6	43.8	11		659.823	1317.63	1318.64	2	-0.003602	-2.732	131	141	5
3227	173	hypothetical protein VITISV_028800 [Vitis vinifera]	gi|147805616,gi|225432802	27155.9	0.273	GcFFTTSGGLR	63.6	41.8	9.26	c2: Carbamidomethyl (+57.02)	601.787	1201.56	1202.56	2	0.004413	3.669	188	198	5
3227	173	hypothetical protein VITISV_028800 [Vitis vinifera]	gi|147805616,gi|225432802	27155.9	0.273	TPDSASLPALK	64.8	42.8	10.5		550.303	1098.59	1099.6	2	-0.0006419	-0.5838	18	28	5
3227	173	hypothetical protein VITISV_028800 [Vitis vinifera]	gi|147805616,gi|225432802	27155.9	0.273	VDSSGQVcGANFK	48	41.6	9.73	c8: Carbamidomethyl (+57.02)	684.816	1367.62	1368.62	2	0.003253	2.377	213	225	5
3227	173	hypothetical protein VITISV_006468 [Vitis vinifera]	gi|147834297,gi|225428757	33407.4	0.13	mKPAAEDLAR	36.6	44.6	2.25	m1: Oxidation (+15.99)	373.193	1116.56	1117.57	3	-0.003643	-3.26	219	228	3
3227	173	hypothetical protein VITISV_006468 [Vitis vinifera]	gi|147834297,gi|225428757	33407.4	0.13	VFIAGDSAGGNISHTLAVR	109	44.8	13.3		629.003	1883.99	1884.99	3	0.002392	1.269	156	174	3
3227	173	hypothetical protein VITISV_006468 [Vitis vinifera]	gi|147834297,gi|225428757	33407.4	0.13	VGSIGLTGVR	65.8	45.6	7.55		479.786	957.557	958.568	2	-0.004142	-4.321	175	184	3
3227	173	PREDICTED: 14-3-3 protein [Vitis vinifera]	gi|359492889	29327.1	0.273	GNEDHVAmIR	38.8	41.1	-0.591	m8: Oxidation (+15.99)	386.516	1156.53	1157.54	3	-0.004103	-3.545	80	89	5
3227	173	PREDICTED: 14-3-3 protein [Vitis vinifera]	gi|359492889	29327.1	0.273	QAFDEAIAELDTLGEESYK	33.2	44	9.13		710.34	2128	2128.99	3	0.014	6.577	203	221	5
3227	173	PREDICTED: 14-3-3 protein [Vitis vinifera]	gi|359492889	29327.1	0.273	SAQDIANAELAPTHPIR	49.4	45.4	10.9		601.986	1802.94	1803.93	3	0.009162	5.079	160	176	5
3227	173	PREDICTED: 14-3-3 protein [Vitis vinifera]	gi|359492889	29327.1	0.273	VSAAVDSEELTVEER	95.6	44.6	10.8		817.398	1632.78	1633.79	2	-0.003062	-1.874	34	48	5
3227	173	PREDICTED: 14-3-3 protein [Vitis vinifera]	gi|359492889	29327.1	0.273	YEEMVEFMEK	65.9	36.3	0		667.785	1333.55	1334.56	2	-0.002222	-1.665	24	33	5
3227	173	unnamed protein product [Vitis vinifera]	gi|297736342	22185.8	0.102	VFFLDSSGK	47.3	43.2	8.01		500.262	998.509	999.515	2	0.001278	1.279	111	119	2
3227	173	unnamed protein product [Vitis vinifera]	gi|297736342	22185.8	0.102	VINETNESWAK	82.1	45.1	10.6		645.821	1289.63	1290.63	2	0.001838	1.424	172	182	2
8717	174	unnamed protein product [Vitis vinifera]	gi|296086274,gi|359486641	102595	0.0501	AITTLPENFK	40.1	45.6	7.19		567.314	1132.61	1133.62	2	0.0002981	0.2629	520	529	4
8717	174	unnamed protein product [Vitis vinifera]	gi|296086274,gi|359486641	102595	0.0501	LSGQDVER	81.5	43.7	4.67		452.23	902.446	903.453	2	0.0002381	0.2635	573	580	4
8717	174	unnamed protein product [Vitis vinifera]	gi|296086274,gi|359486641	102595	0.0501	SNLSEFDDVQGHPGFDK	62.7	41.3	10.9		631.288	1890.84	1891.85	3	0.004912	2.596	769	785	4
8717	174	unnamed protein product [Vitis vinifera]	gi|296086274,gi|359486641	102595	0.0501	SSQYcTDVAK	37.1	38	8.23	c5: Carbamidomethyl (+57.02)	579.756	1157.5	1158.51	2	-0.005307	-4.581	361	370	4
8717	174	hypothetical protein VITISV_029521 [Vitis vinifera]	gi|147810893,gi|225447278	56432.2	0.0538	GPMLLGVK	43.3	45.6	0		407.747	813.479	814.486	2	0.0001381	0.1695	413	420	1
8717	174	hypothetical protein VITISV_029521 [Vitis vinifera]	gi|147810893,gi|225447278	56432.2	0.0538	STYEAITK	39.8	42.6	2.63		456.738	911.461	912.467	2	0.001018	1.116	237	244	1
8717	174	hypothetical protein VITISV_029521 [Vitis vinifera]	gi|147810893,gi|225447278	56432.2	0.0538	TSLAPGSGVVTK	54.9	45.3	8.47		558.819	1115.62	1116.63	2	0.003918	3.509	95	106	1
8717	174	PREDICTED: neutral alpha-glucosidase AB-like [Vitis vinifera]	gi|225433575	105199	0.0616	IIVLGHSSGPK	54.9	41.5	4.72		369.887	1106.64	1107.65	3	-0.004508	-4.07	869	879	5
8717	174	PREDICTED: neutral alpha-glucosidase AB-like [Vitis vinifera]	gi|225433575	105199	0.0616	NALIEPSNR	39.9	42.7	8.22		507.272	1012.53	1013.54	2	-0.0002619	-0.2584	880	888	5
8717	174	PREDICTED: neutral alpha-glucosidase AB-like [Vitis vinifera]	gi|225433575	105199	0.0616	RPNVPVADDWTIK	35	44.1	9.05		504.273	1509.8	1510.8	3	0.002762	1.828	912	924	5
8717	174	PREDICTED: neutral alpha-glucosidase AB-like [Vitis vinifera]	gi|225433575	105199	0.0616	TLFSSAcVIER	74.2	44.2	10.4	c7: Carbamidomethyl (+57.02)	641.828	1281.64	1282.65	2	0.002053	1.6	858	868	5
8717	174	PREDICTED: neutral alpha-glucosidase AB-like [Vitis vinifera]	gi|225433575	105199	0.0616	VKIDEDPSLDPPK	24.6	44.9	5.32		484.923	1451.75	1452.76	3	-0.003458	-2.38	101	113	5
8717	174	PREDICTED: elongation factor 2-like isoform 1 [Vitis vinifera]	gi|225462164	93961.6	0.447	AYLPVVESFGFSGTLR	81.2	45	12.6		871.959	1741.9	1742.91	2	0.0002381	0.1366	771	786	33
8717	174	PREDICTED: elongation factor 2-like isoform 1 [Vitis vinifera]	gi|225462164	93961.6	0.447	DKLWPmLQK	32.5	45.8	7.95	m6: Oxidation (+15.99)	587.818	1173.62	1174.63	2	-0.001057	-0.8998	292	300	33
8717	174	PREDICTED: elongation factor 2-like isoform 1 [Vitis vinifera]	gi|225462164	93961.6	0.447	DLQDDFmGGAEIVK	70.8	42.7	9.6	m7: Oxidation (+15.99)	777.362	1552.71	1553.72	2	0.001823	1.173	544	557	33
8717	174	PREDICTED: elongation factor 2-like isoform 1 [Vitis vinifera]	gi|225462164	93961.6	0.447	DSVVAGFQWASK	33.7	44.9	9.42		647.822	1293.63	1294.64	2	-0.005202	-4.018	662	673	33
8717	174	PREDICTED: elongation factor 2-like isoform 1 [Vitis vinifera]	gi|225462164	93961.6	0.447	EGALAEENMR	55.4	41	0		560.26	1118.51	1119.51	2	0.002818	2.517	674	683	33
8717	174	PREDICTED: elongation factor 2-like isoform 1 [Vitis vinifera]	gi|225462164	93961.6	0.447	EQmTPLSEFEDK	59.8	40.4	6.62	m3: Oxidation (+15.99)	735.33	1468.65	1469.65	2	0.005823	3.962	831	842	33
8717	174	PREDICTED: elongation factor 2-like isoform 1 [Vitis vinifera]	gi|225462164	93961.6	0.447	EQmTPLSEFEDKL	39.4	42.6	9.9	m3: Oxidation (+15.99)	791.869	1581.72	1582.73	2	-0.000837	-0.5288	831	843	33
8717	174	PREDICTED: elongation factor 2-like isoform 1 [Vitis vinifera]	gi|225462164	93961.6	0.447	FGVDESK	38.5	42.5	3.65		391.19	780.366	781.373	2	0.0005581	0.7142	233	239	33
8717	174	PREDICTED: elongation factor 2-like isoform 1 [Vitis vinifera]	gi|225462164	93961.6	0.447	FSVSPVVR	49.4	43.5	6.62		445.759	889.504	890.509	2	0.002238	2.513	483	490	33
8717	174	PREDICTED: elongation factor 2-like isoform 1 [Vitis vinifera]	gi|225462164	93961.6	0.447	FTVEELRR	33.8	45.3	4.77		525.289	1048.56	1049.57	2	-0.002082	-1.984	4	11	33
8717	174	PREDICTED: elongation factor 2-like isoform 1 [Vitis vinifera]	gi|225462164	93961.6	0.447	GFVQFcYEPIK	45.3	44	10.5	c6: Carbamidomethyl (+57.02)	694.342	1386.67	1387.67	2	0.005613	4.045	270	280	33
8717	174	PREDICTED: elongation factor 2-like isoform 1 [Vitis vinifera]	gi|225462164	93961.6	0.447	GVQYLNEIK	49.3	45.3	4.91		532.295	1062.58	1063.58	2	0.004558	4.286	653	661	33
8717	174	PREDICTED: elongation factor 2-like isoform 1 [Vitis vinifera]	gi|225462164	93961.6	0.447	ILSEEFGWDKDLAK	71.7	45.6	10.5		550.953	1649.84	1650.84	3	0.005722	3.466	619	632	33
8717	174	PREDICTED: elongation factor 2-like isoform 1 [Vitis vinifera]	gi|225462164	93961.6	0.447	IMGPNYVPGEK	60	45.2	0		602.806	1203.6	1204.6	2	0.001938	1.609	411	421	33
8717	174	PREDICTED: elongation factor 2-like isoform 1 [Vitis vinifera]	gi|225462164	93961.6	0.447	IRPVLTVNK	43.9	36	4.48		520.335	1038.66	1039.66	2	0.0009181	0.883	151	159	33
8717	174	PREDICTED: elongation factor 2-like isoform 1 [Vitis vinifera]	gi|225462164	93961.6	0.447	ITDGALVVVDcVEGVcVQTETVLR	82	45.3	10.9	c11: Carbamidomethyl (+57.02), c16: Carbamidomethyl (+57.02)	878.117	2631.33	2632.33	3	0.003381	1.285	121	144	33
8717	174	PREDICTED: elongation factor 2-like isoform 1 [Vitis vinifera]	gi|225462164	93961.6	0.447	IWcFGPETTGPNMVVDmcK	45.9	38	0	c3: Carbamidomethyl (+57.02), m17: Oxidation (+15.99), c18: Carbamidomethyl (+57.02)	753.329	2256.97	2257.98	3	-0.002294	-1.016	634	652	33
8717	174	PREDICTED: elongation factor 2-like isoform 1 [Vitis vinifera]	gi|225462164	93961.6	0.447	LGVTMK	28.3	42.9	0		324.691	647.367	648.375	2	-0.0008419	-1.299	301	306	33
8717	174	PREDICTED: elongation factor 2-like isoform 1 [Vitis vinifera]	gi|225462164	93961.6	0.447	LWGENFFDPSTR	41.1	43.7	6.82		490.237	1467.69	1468.69	3	0.01056	7.191	244	255	33
8717	174	PREDICTED: elongation factor 2-like isoform 1 [Vitis vinifera]	gi|225462164	93961.6	0.447	NcDPEGPLmLYVSK	68.8	42.4	11.3	c2: Carbamidomethyl (+57.02), m9: Oxidation (+15.99)	546.922	1637.75	1638.75	3	0.002102	1.283	369	382	33
8717	174	PREDICTED: elongation factor 2-like isoform 1 [Vitis vinifera]	gi|225462164	93961.6	0.447	NmSVIAHVDHGK	30.4	44.4	8.21	m2: Oxidation (+15.99)	441.887	1322.64	1323.65	3	-0.001073	-0.8106	21	32	33
8717	174	PREDICTED: elongation factor 2-like isoform 1 [Vitis vinifera]	gi|225462164	93961.6	0.447	QIINTcMNDQK	46.5	42.7	0	c6: Carbamidomethyl (+57.02)	682.822	1363.63	1364.63	2	0.007493	5.491	281	291	33
8717	174	PREDICTED: elongation factor 2-like isoform 1 [Vitis vinifera]	gi|225462164	93961.6	0.447	QIINTcmNDQKDK	55.9	41.9	10	c6: Carbamidomethyl (+57.02), m7: Oxidation (+15.99)	541.918	1622.73	1623.75	3	-0.006448	-3.971	281	293	33
8717	174	PREDICTED: elongation factor 2-like isoform 1 [Vitis vinifera]	gi|225462164	93961.6	0.447	SDEKDLMGK	56.4	43.9	0		511.746	1021.48	1022.48	2	0.002818	2.756	307	315	33
8717	174	PREDICTED: elongation factor 2-like isoform 1 [Vitis vinifera]	gi|225462164	93961.6	0.447	SDPVVSFR	48.9	44.6	7.73		453.738	905.462	906.468	2	0.001218	1.344	558	565	33
8717	174	PREDICTED: elongation factor 2-like isoform 1 [Vitis vinifera]	gi|225462164	93961.6	0.447	STGISLYYEmSDESLK	51.7	41.8	9.15	m10: Oxidation (+15.99)	919.92	1837.83	1838.84	2	-0.003897	-2.119	72	87	33
8717	174	PREDICTED: elongation factor 2-like isoform 1 [Vitis vinifera]	gi|225462164	93961.6	0.447	STLTDSLVAAAGIIAQEVAGDVR	75.7	44.3	8.97		753.071	2256.19	2257.2	3	-0.006428	-2.848	33	55	33
8717	174	PREDICTED: elongation factor 2-like isoform 1 [Vitis vinifera]	gi|225462164	93961.6	0.447	TVIWMGK	36.5	43.9	0		417.733	833.452	834.454	2	0.005458	6.541	432	438	33
8717	174	PREDICTED: elongation factor 2-like isoform 1 [Vitis vinifera]	gi|225462164	93961.6	0.447	VASDLPK	47.3	41.4	3.28		365.212	728.409	729.414	2	0.001978	2.712	497	503	33
8717	174	PREDICTED: elongation factor 2-like isoform 1 [Vitis vinifera]	gi|225462164	93961.6	0.447	VENLYEGPLDDIYATAIR	104	45.4	12.7		1026.52	2051.04	2052.03	2	0.01376	6.705	351	368	33
8717	174	PREDICTED: elongation factor 2-like isoform 1 [Vitis vinifera]	gi|225462164	93961.6	0.447	VIENANVIMATYEDPLLGDVQVYPEK	115	45.3	0		974.163	2919.47	2920.47	3	0.008282	2.836	181	206	33
8717	174	PREDICTED: elongation factor 2-like isoform 1 [Vitis vinifera]	gi|225462164	93961.6	0.447	VIYASQLTAKPR	75.9	42.4	10.9		449.597	1345.77	1346.78	3	-0.003508	-2.605	713	724	33
8717	174	PREDICTED: elongation factor 2-like isoform 1 [Vitis vinifera]	gi|225462164	93961.6	0.447	YRVENLYEGPLDDIYATAIR	57.6	45.2	13.4		791.073	2370.2	2371.19	3	0.0105	4.429	349	368	33
8717	174	PREDICTED: aconitate hydratase 1-like [Vitis vinifera]	gi|225468576,gi|296084058	98170.6	0.0456	GPMLLGVK	43.3	45.6	0		407.747	813.479	814.486	2	0.0001381	0.1695	791	798	4
8717	174	PREDICTED: aconitate hydratase 1-like [Vitis vinifera]	gi|225468576,gi|296084058	98170.6	0.0456	IIDWENSSPK	63.4	44.7	10.8		594.801	1187.59	1188.59	2	0.004338	3.65	67	76	4
8717	174	PREDICTED: aconitate hydratase 1-like [Vitis vinifera]	gi|225468576,gi|296084058	98170.6	0.0456	TSLAPGSGVVTK	54.9	45.3	8.47		558.819	1115.62	1116.63	2	0.003918	3.509	473	484	4
8717	174	PREDICTED: aconitate hydratase 1-like [Vitis vinifera]	gi|225468576,gi|296084058	98170.6	0.0456	YYSLPALGDPR	43.5	45	8.63		626.322	1250.63	1251.64	2	-0.0008819	-0.7046	25	35	4
8717	174	hypothetical protein VITISV_027630 [Vitis vinifera]	gi|147791852,gi|225468761	33216.2	0.362	DGIDYAAVTVQLPGGER	92.3	45.2	12		880.946	1759.88	1760.88	2	0.002978	1.691	171	187	9
8717	174	hypothetical protein VITISV_027630 [Vitis vinifera]	gi|147791852,gi|225468761	33216.2	0.362	FEEKDGIDYAAVTVQLPGGER	54.9	45.3	13.4		765.38	2293.12	2294.13	3	-0.004138	-1.804	167	187	9
8717	174	hypothetical protein VITISV_027630 [Vitis vinifera]	gi|147791852,gi|225468761	33216.2	0.362	IQGFWYGQLES	27.4	43.5	6.93		664.324	1326.63	1327.63	2	0.009358	7.049	302	312	9
8717	174	hypothetical protein VITISV_027630 [Vitis vinifera]	gi|147791852,gi|225468761	33216.2	0.362	ITLSVTK	29.6	41	2.79		381.241	760.467	761.477	2	-0.002602	-3.417	264	270	9
8717	174	hypothetical protein VITISV_027630 [Vitis vinifera]	gi|147791852,gi|225468761	33216.2	0.362	LTYTLDEIEGPFEVSSDGTVK	94.5	45.3	12		1150.57	2299.13	2300.12	2	0.0171	7.434	146	166	9
8717	174	hypothetical protein VITISV_027630 [Vitis vinifera]	gi|147791852,gi|225468761	33216.2	0.362	QLVASGKPDK	31.9	43.4	5.71		348.201	1041.58	1042.59	3	-0.001528	-1.466	196	205	9
8717	174	hypothetical protein VITISV_027630 [Vitis vinifera]	gi|147791852,gi|225468761	33216.2	0.362	RLTYDEIQSK	22.5	44.5	8.95		418.222	1251.64	1252.65	3	-0.002708	-2.162	70	79	9
8717	174	hypothetical protein VITISV_027630 [Vitis vinifera]	gi|147791852,gi|225468761	33216.2	0.362	SKPETGEVIGVFESIQPSDTDLGAK	58.9	45.4	8.34		868.772	2603.29	2604.3	3	-0.002688	-1.032	271	295	9
8717	174	hypothetical protein VITISV_027630 [Vitis vinifera]	gi|147791852,gi|225468761	33216.2	0.362	VPFLFTIK	26.2	39.4	2.15		482.797	963.58	964.587	2	0.0007381	0.7652	188	195	9
8717	174	PREDICTED: 14-3-3 protein [Vitis vinifera]	gi|359492889	29327.1	0.0577	VSAAVDSEELTVEER	126	44.5	11.2		817.399	1632.78	1633.79	2	-0.0005219	-0.3195	34	48	1
8717	174	hypothetical protein VITISV_018473 [Vitis vinifera]	gi|147821107,gi|225439223	81620.3	0.0722	GVTGFGFDLVR	66.3	44.3	8.44		584.309	1166.6	1167.62	2	-0.004662	-3.993	229	239	5
8717	174	hypothetical protein VITISV_018473 [Vitis vinifera]	gi|147821107,gi|225439223	81620.3	0.0722	IPSTEEIADR	99.7	44.1	8.85		565.786	1129.56	1130.57	2	-0.003962	-3.504	674	683	5
8717	174	hypothetical protein VITISV_018473 [Vitis vinifera]	gi|147821107,gi|225439223	81620.3	0.0722	VAADLR	36.5	46.7	0		322.69	643.365	644.373	2	0.0001381	0.2143	37	42	5
8717	174	hypothetical protein VITISV_018473 [Vitis vinifera]	gi|147821107,gi|225439223	81620.3	0.0722	YGAGIGPGVYDIHSPR	75.1	45.1	12.5		553.617	1657.83	1658.83	3	0.008872	5.348	658	673	5
8717	174	hypothetical protein VITISV_018473 [Vitis vinifera]	gi|147821107,gi|225439223	81620.3	0.0722	YLFAGVVDGR	41.2	44.1	6.97		548.794	1095.57	1096.58	2	0.002078	1.895	256	265	5
5526	175	PREDICTED: DEAD-box ATP-dependent RNA helicase 56-like [Vitis vinifera]	gi|225430261,gi|225442993,gi|296082026	48377.3	0.0537	ILVATDLVGR	58.2	42.7	7.26		528.825	1055.64	1056.64	2	0.001398	1.323	342	351	2
5526	175	PREDICTED: DEAD-box ATP-dependent RNA helicase 56-like [Vitis vinifera]	gi|225430261,gi|225442993,gi|296082026	48377.3	0.0537	NEcPHIVVGTPGR	46.2	44.9	7.66	c3: Carbamidomethyl (+57.02)	479.241	1434.7	1435.71	3	-0.003423	-2.384	165	177	2
5526	175	PREDICTED: peroxidase 12-like [Vitis vinifera]	gi|359493149	39166.8	0.331	DGLNFASR	53.5	44	4.42		440.221	878.427	879.432	2	0.002538	2.886	169	176	11
5526	175	PREDICTED: peroxidase 12-like [Vitis vinifera]	gi|359493149	39166.8	0.331	DIGNAAGLLR	29.8	43.3	7.4		500.284	998.554	999.558	2	0.003218	3.219	72	81	11
5526	175	PREDICTED: peroxidase 12-like [Vitis vinifera]	gi|359493149	39166.8	0.331	DSVHLSGGPDYDVPLGR	77.5	44.6	10.9		595.293	1782.86	1783.86	3	0.002872	1.61	151	167	11
5526	175	PREDICTED: peroxidase 12-like [Vitis vinifera]	gi|359493149	39166.8	0.331	LYPTQDPTmEEK	77.1	41.5	9.45	m9: Oxidation (+15.99)	734.336	1466.66	1467.67	2	-0.002677	-1.824	228	239	11
5526	175	PREDICTED: peroxidase 12-like [Vitis vinifera]	gi|359493149	39166.8	0.331	MGQLSVLTGK	63.5	45.7	0		517.29	1032.57	1033.57	2	0.001178	1.14	319	328	11
5526	175	PREDICTED: peroxidase 12-like [Vitis vinifera]	gi|359493149	39166.8	0.331	NSDNIQLK	19.7	45.3	3.63		466.245	930.475	931.484	2	-0.002362	-2.536	340	347	11
5526	175	PREDICTED: peroxidase 12-like [Vitis vinifera]	gi|359493149	39166.8	0.331	QGLFTSDQDLYSYEK	91.7	42.7	11.9		897.416	1792.82	1793.82	2	0.001258	0.7013	279	293	11
5526	175	PREDICTED: peroxidase 12-like [Vitis vinifera]	gi|359493149	39166.8	0.331	SFAEDEALFYEK	53.6	41.7	9.3		724.834	1447.65	1448.66	2	0.002718	1.876	300	311	11
5526	175	PREDICTED: peroxidase 12-like [Vitis vinifera]	gi|359493149	39166.8	0.331	TVVEEDKEASAEL	38.3	44	8.83		710.347	1418.68	1419.68	2	0.001398	0.9848	348	360	11
5526	175	PREDICTED: peroxidase 12-like [Vitis vinifera]	gi|359493149	39166.8	0.331	VESVIR	33.3	46.3	1.21		351.713	701.411	702.414	2	0.004118	5.863	57	62	11
5526	175	PREDICTED: peroxidase 12-like [Vitis vinifera]	gi|359493149	39166.8	0.331	YYVDLVHR	37.3	45.3	0.994		355.521	1063.54	1064.55	3	-0.003268	-3.07	271	278	11
5526	175	PREDICTED: argininosuccinate synthase, chloroplastic-like [Vitis vinifera]	gi|225456274	55163	0.0986	ELESLTLDR	54.2	45.7	7.43		538.285	1074.56	1075.56	2	-0.0008019	-0.7456	384	392	5
5526	175	PREDICTED: argininosuccinate synthase, chloroplastic-like [Vitis vinifera]	gi|225456274	55163	0.0986	ELSPASLLSK	47.7	45.7	7.9		522.801	1043.59	1044.59	2	0.001498	1.434	332	341	5
5526	175	PREDICTED: argininosuccinate synthase, chloroplastic-like [Vitis vinifera]	gi|225456274	55163	0.0986	EVGADAVSHGcTGK	30.5	40.5	4.34	c11: Carbamidomethyl (+57.02)	463.212	1386.61	1387.63	3	-0.005583	-4.024	205	218	5
5526	175	PREDICTED: argininosuccinate synthase, chloroplastic-like [Vitis vinifera]	gi|225456274	55163	0.0986	GSVTVAGLK	34.2	45	4.77		416.251	830.487	831.494	2	0.0009181	1.104	444	452	5
5526	175	PREDICTED: argininosuccinate synthase, chloroplastic-like [Vitis vinifera]	gi|225456274	55163	0.0986	IDMVENR	52.9	43.8	0		438.715	875.416	876.424	2	-0.001462	-1.668	354	360	5
5526	175	PREDICTED: ATP-citrate synthase alpha chain protein 2 isoform 1 [Vitis vinifera]	gi|225450474,gi|359487578	46416	0.0827	FTVLNPK	42.8	44.5	4.22		409.743	817.471	818.477	2	0.001218	1.488	263	269	3
5526	175	PREDICTED: ATP-citrate synthase alpha chain protein 2 isoform 1 [Vitis vinifera]	gi|225450474,gi|359487578	46416	0.0827	VLSPTEGYIHSLDEK	53.7	45	11.2		563.286	1686.84	1687.85	3	-0.01152	-6.824	242	256	3
5526	175	PREDICTED: ATP-citrate synthase alpha chain protein 2 isoform 1 [Vitis vinifera]	gi|225450474,gi|359487578	46416	0.0827	VVLDcATADPDGR	69.1	42.4	11.7	c5: Carbamidomethyl (+57.02)	694.828	1387.64	1388.65	2	0.001873	1.349	319	331	3
5526	175	hypothetical protein VITISV_030014 [Vitis vinifera]	gi|147811194,gi|297740669,gi|359483854	46912.3	0.0454	LLAGESGISPIDR	70	44.1	11.2		664.365	1326.71	1327.72	2	0.0001981	0.1492	53	65	2
5526	175	hypothetical protein VITISV_030014 [Vitis vinifera]	gi|147811194,gi|297740669,gi|359483854	46912.3	0.0454	YcIVAGK	31.3	43.4	2.62	c2: Carbamidomethyl (+57.02)	405.712	809.41	810.418	2	-0.0002272	-0.2804	102	108	2
5526	175	hypothetical protein VITISV_020937 [Vitis vinifera]	gi|147783001,gi|225460446	49109.3	0.261	EQESNQSHFR	22.1	39.3	6.35		421.191	1260.55	1261.56	3	0.002272	1.801	350	359	10
5526	175	hypothetical protein VITISV_020937 [Vitis vinifera]	gi|147783001,gi|225460446	49109.3	0.261	FGcTLEFVTNK	52.1	43.2	10.2	c3: Carbamidomethyl (+57.02)	658.322	1314.63	1315.64	2	0.0009728	0.7394	386	396	10
5526	175	hypothetical protein VITISV_020937 [Vitis vinifera]	gi|147783001,gi|225460446	49109.3	0.261	FTVDLPK	38	44.1	4.92		410.234	818.453	819.461	2	-0.001222	-1.491	171	177	10
5526	175	hypothetical protein VITISV_020937 [Vitis vinifera]	gi|147783001,gi|225460446	49109.3	0.261	GFGGIGGILR	41.3	44.1	9.68		473.778	945.542	946.547	2	0.001958	2.069	406	415	10
5526	175	hypothetical protein VITISV_020937 [Vitis vinifera]	gi|147783001,gi|225460446	49109.3	0.261	QSVLGAITSAQQR	80.3	45.3	10.1		679.873	1357.73	1358.74	2	-0.0007819	-0.5755	68	80	10
5526	175	hypothetical protein VITISV_020937 [Vitis vinifera]	gi|147783001,gi|225460446	49109.3	0.261	SQEGSQFcR	46.9	37.1	7.73	c8: Carbamidomethyl (+57.02)	549.734	1097.45	1098.46	2	-0.001947	-1.773	397	405	10
5526	175	hypothetical protein VITISV_020937 [Vitis vinifera]	gi|147783001,gi|225460446	49109.3	0.261	TELSQSDMFDPR	61.9	40.4	0		713.321	1424.63	1425.63	2	0.003118	2.187	235	246	10
5526	175	hypothetical protein VITISV_020937 [Vitis vinifera]	gi|147783001,gi|225460446	49109.3	0.261	YFEEISQDTGK	54.2	40.8	10.7		658.804	1315.59	1316.6	2	-0.0007619	-0.5787	291	301	10
5526	175	hypothetical protein VITISV_020937 [Vitis vinifera]	gi|147783001,gi|225460446	49109.3	0.261	YQLDMR	30.3	42.9	0		413.199	824.384	825.392	2	-0.0009419	-1.141	416	421	10
5526	175	hypothetical protein VITISV_020937 [Vitis vinifera]	gi|147783001,gi|225460446	49109.3	0.261	YVFGVDDTLK	50.6	43.6	9.13		578.8	1155.59	1156.59	2	0.004498	3.889	302	311	10
5526	175	PREDICTED: 3-phosphoshikimate 1-carboxyvinyltransferase, chloroplastic [Vitis vinifera]	gi|225454012	55468.7	0.251	DVASWR	41.4	44.3	0.448		367.186	732.357	733.363	2	0.001578	2.152	428	433	9
5526	175	PREDICTED: 3-phosphoshikimate 1-carboxyvinyltransferase, chloroplastic [Vitis vinifera]	gi|225454012	55468.7	0.251	EISGTITLPGSK	43.5	45.1	8.69		601.836	1201.66	1202.66	2	0.002258	1.878	89	100	9
5526	175	PREDICTED: 3-phosphoshikimate 1-carboxyvinyltransferase, chloroplastic [Vitis vinifera]	gi|225454012	55468.7	0.251	EKPSTAPEIVLQPIK	39.1	40.2	9.25		550.654	1648.94	1649.95	3	0.001432	0.8679	74	88	9
5526	175	PREDICTED: 3-phosphoshikimate 1-carboxyvinyltransferase, chloroplastic [Vitis vinifera]	gi|225454012	55468.7	0.251	ERPIGDLVTGLK	41.6	41.5	7.26		649.38	1296.74	1297.75	2	0.003998	3.081	207	218	9
5526	175	PREDICTED: 3-phosphoshikimate 1-carboxyvinyltransferase, chloroplastic [Vitis vinifera]	gi|225454012	55468.7	0.251	FAEVLEQMGAK	74.2	45.3	0		611.812	1221.61	1222.61	2	0.003938	3.221	363	373	9
5526	175	PREDICTED: 3-phosphoshikimate 1-carboxyvinyltransferase, chloroplastic [Vitis vinifera]	gi|225454012	55468.7	0.251	FGVSVEHSNTWDR	62.3	42.1	10.1		511.908	1532.7	1533.71	3	0.001792	1.168	297	309	9
5526	175	PREDICTED: 3-phosphoshikimate 1-carboxyvinyltransferase, chloroplastic [Vitis vinifera]	gi|225454012	55468.7	0.251	LNVTSIDTYDDHR	51.8	43.3	8.62		516.915	1547.72	1548.73	3	0.001582	1.022	469	481	9
5526	175	PREDICTED: 3-phosphoshikimate 1-carboxyvinyltransferase, chloroplastic [Vitis vinifera]	gi|225454012	55468.7	0.251	mIAIcTELR	30.5	44.7	8.37	m1: Oxidation (+15.99), c5: Carbamidomethyl (+57.02)	561.785	1121.56	1122.56	2	-0.001822	-1.623	440	448	9
5526	175	PREDICTED: 3-phosphoshikimate 1-carboxyvinyltransferase, chloroplastic [Vitis vinifera]	gi|225454012	55468.7	0.251	QLGADVNcFLGTNcPPVR	47.8	44.1	9.97	c8: Carbamidomethyl (+57.02), c14: Carbamidomethyl (+57.02)	673.326	2016.95	2017.96	3	0.003441	1.705	219	236	9
5526	175	hypothetical protein VITISV_023439 [Vitis vinifera]	gi|147807935,gi|225444029	40514.2	0.126	AGVIVNASESKPEK	49.8	44.4	9.74		476.928	1427.76	1428.77	3	0.0007021	0.4914	235	248	4
5526	175	hypothetical protein VITISV_023439 [Vitis vinifera]	gi|147807935,gi|225444029	40514.2	0.126	ALVDLDGR	37.6	44.1	3.79		429.737	857.459	858.468	2	-0.001582	-1.843	326	333	4
5526	175	hypothetical protein VITISV_023439 [Vitis vinifera]	gi|147807935,gi|225444029	40514.2	0.126	KPSSVFAPPQSVLK	23.5	43	7.66		495.619	1483.83	1484.85	3	-0.005728	-3.858	39	52	4
5526	175	hypothetical protein VITISV_023439 [Vitis vinifera]	gi|147807935,gi|225444029	40514.2	0.126	LNISGEEAWR	42.2	43.9	7.55		587.794	1173.57	1174.59	2	-0.003442	-2.93	148	157	4
5526	175	RecName: Full=Ribulose bisphosphate carboxylase large chain; Short=RuBisCO large subunit; Flags: Precursor	gi|115311623,gi|147769051,gi|46275228	52501.5	0.0421	EGNEIIR	46.7	43.3	2.2		415.722	829.429	830.437	2	-0.0007419	-0.8934	440	446	2
5526	175	RecName: Full=Ribulose bisphosphate carboxylase large chain; Short=RuBisCO large subunit; Flags: Precursor	gi|115311623,gi|147769051,gi|46275228	52501.5	0.0421	TFQGPPHGIQVER	37.4	45.6	10.3		489.256	1464.75	1465.75	3	-0.002358	-1.609	147	159	2
5526	175	RecName: Full=S-adenosylmethionine synthase 2; Short=AdoMet synthase 2; AltName: Full=Methionine adenosyltransferase 2; Short=MAT 2	gi|223635284	43095.8	0.247	DDPDFTWEVVKPLK	43.7	45	10.3		563.619	1687.83	1688.85	3	-0.01162	-6.879	374	387	8
5526	175	RecName: Full=S-adenosylmethionine synthase 2; Short=AdoMet synthase 2; AltName: Full=Methionine adenosyltransferase 2; Short=MAT 2	gi|223635284	43095.8	0.247	EHVIKPVIPEK	17.7	41.4	5.19		430.259	1287.75	1288.76	3	-0.001568	-1.217	212	222	8
5526	175	RecName: Full=S-adenosylmethionine synthase 2; Short=AdoMet synthase 2; AltName: Full=Methionine adenosyltransferase 2; Short=MAT 2	gi|223635284	43095.8	0.247	FVIGGPHGDAGLTGR	83.6	44.6	12		485.256	1452.75	1453.75	3	-0.0006879	-0.4732	238	252	8
5526	175	RecName: Full=S-adenosylmethionine synthase 2; Short=AdoMet synthase 2; AltName: Full=Methionine adenosyltransferase 2; Short=MAT 2	gi|223635284	43095.8	0.247	SGAYIVR	44.3	43.9	3.51		383.218	764.421	765.425	2	0.003238	4.23	281	287	8
5526	175	RecName: Full=S-adenosylmethionine synthase 2; Short=AdoMet synthase 2; AltName: Full=Methionine adenosyltransferase 2; Short=MAT 2	gi|223635284	43095.8	0.247	SIVANGLAR	31.6	44.2	3.11		450.768	899.521	900.526	2	0.001738	1.93	292	300	8
5526	175	RecName: Full=S-adenosylmethionine synthase 2; Short=AdoMet synthase 2; AltName: Full=Methionine adenosyltransferase 2; Short=MAT 2	gi|223635284	43095.8	0.247	TAAYGHFGR	67.8	44.5	8.36		490.241	978.468	979.474	2	0.0009981	1.019	365	373	8
5526	175	RecName: Full=S-adenosylmethionine synthase 2; Short=AdoMet synthase 2; AltName: Full=Methionine adenosyltransferase 2; Short=MAT 2	gi|223635284	43095.8	0.247	TIFHLNPSGR	49.8	43.5	5.67		381.209	1140.61	1141.61	3	0.002722	2.384	228	237	8
5526	175	RecName: Full=S-adenosylmethionine synthase 2; Short=AdoMet synthase 2; AltName: Full=Methionine adenosyltransferase 2; Short=MAT 2	gi|223635284	43095.8	0.247	VLVNIEQQSPDIAQGVHGHLTK	53.6	43.8	10.2		795.095	2382.26	2383.27	3	-0.003868	-1.623	92	113	8
5526	175	PREDICTED: protein disulfide isomerase-like 2-3 [Vitis vinifera]	gi|225447176	46590.4	0.328	ALTPTWEK	30.1	46.6	6.41		473.255	944.495	945.504	2	-0.002182	-2.308	68	75	10
5526	175	PREDICTED: protein disulfide isomerase-like 2-3 [Vitis vinifera]	gi|225447176	46590.4	0.328	DTPVPYEGAR	39.3	43.6	7.02		552.77	1103.53	1104.53	2	0.0006781	0.6139	245	254	10
5526	175	PREDICTED: protein disulfide isomerase-like 2-3 [Vitis vinifera]	gi|225447176	46590.4	0.328	DVKPIAEFALQQIK	41.7	42.7	8.02		533.974	1598.9	1599.91	3	-0.002158	-1.349	126	139	10
5526	175	PREDICTED: protein disulfide isomerase-like 2-3 [Vitis vinifera]	gi|225447176	46590.4	0.328	FSVQGFPTILVFGADKDTPVPYEGAR	157	44.7	13.5		937.821	2810.44	2811.44	3	0.01335	4.749	229	254	10
5526	175	PREDICTED: protein disulfide isomerase-like 2-3 [Vitis vinifera]	gi|225447176	46590.4	0.328	GVATVAALDADANQALAQEYGIR	49	45.3	9.13		773.067	2316.18	2317.18	3	0.008362	3.609	82	104	10
5526	175	PREDICTED: protein disulfide isomerase-like 2-3 [Vitis vinifera]	gi|225447176	46590.4	0.328	KGAYAPLK	22.9	43.2	3.96		424.257	846.5	847.504	2	0.002998	3.538	364	371	10
5526	175	PREDICTED: protein disulfide isomerase-like 2-3 [Vitis vinifera]	gi|225447176	46590.4	0.328	LGHVDcDSDK	57.1	37	10.5	c6: Carbamidomethyl (+57.02)	573.249	1144.48	1145.49	2	0.0007128	0.6222	214	223	10
5526	175	PREDICTED: protein disulfide isomerase-like 2-3 [Vitis vinifera]	gi|225447176	46590.4	0.328	SAFELDQIIGFVK	59.8	43.8	11.8		733.903	1465.79	1466.79	2	0.009258	6.312	372	384	10
5526	175	PREDICTED: protein disulfide isomerase-like 2-3 [Vitis vinifera]	gi|225447176	46590.4	0.328	SPYSYVWAAAGK	64.3	43.2	11.9		650.321	1298.63	1299.64	2	-0.003022	-2.325	328	339	10
5526	175	PREDICTED: protein disulfide isomerase-like 2-3 [Vitis vinifera]	gi|225447176	46590.4	0.328	VFAPGKPPVDYQGAR	62.3	46.1	8.85		534.617	1600.83	1601.84	3	-0.007948	-4.962	111	125	10
5526	175	unnamed protein product [Vitis vinifera]	gi|296089198,gi|359489451	49250.2	0.145	DVASWR	41.4	44.3	0.448		367.186	732.357	733.363	2	0.001578	2.152	382	387	1
5526	175	unnamed protein product [Vitis vinifera]	gi|296089198,gi|359489451	49250.2	0.145	EISGTITLPGSK	43.5	45.1	8.69		601.836	1201.66	1202.66	2	0.002258	1.878	55	66	1
5526	175	unnamed protein product [Vitis vinifera]	gi|296089198,gi|359489451	49250.2	0.145	ERPIGDLVTGLK	41.6	41.5	7.26		649.38	1296.74	1297.75	2	0.003998	3.081	173	184	1
5526	175	unnamed protein product [Vitis vinifera]	gi|296089198,gi|359489451	49250.2	0.145	LNVTSIDTYDDHR	51.8	43.3	8.62		516.915	1547.72	1548.73	3	0.001582	1.022	423	435	1
5526	175	unnamed protein product [Vitis vinifera]	gi|296089198,gi|359489451	49250.2	0.145	mIAIcTELR	30.5	44.7	8.37	m1: Oxidation (+15.99), c5: Carbamidomethyl (+57.02)	561.785	1121.56	1122.56	2	-0.001822	-1.623	394	402	1
5526	175	unnamed protein product [Vitis vinifera]	gi|296089198,gi|359489451	49250.2	0.145	VSWTENSVTVTGPPR	89.1	45	10.9		815.413	1628.81	1629.82	2	-0.005182	-3.179	328	342	1
5526	175	PREDICTED: rab GDP dissociation inhibitor alpha [Vitis vinifera]	gi|225434259	49793.1	0.027	AVGVTSEGETAR	79.4	44.9	11.1		588.797	1175.58	1176.59	2	0.001798	1.528	266	277	1
5526	175	PREDICTED: eukaryotic initiation factor 4A-2 [Vitis vinifera]	gi|225442221	46932.2	0.533	ALGDYLGVR	62	44.7	7.57		482.267	962.519	963.526	2	0.0001981	0.2056	130	138	20
5526	175	PREDICTED: eukaryotic initiation factor 4A-2 [Vitis vinifera]	gi|225442221	46932.2	0.533	DELTLEGIK	45.4	45.9	7.04		509.277	1016.54	1017.55	2	0.0007781	0.7646	246	254	20
5526	175	PREDICTED: eukaryotic initiation factor 4A-2 [Vitis vinifera]	gi|225442221	46932.2	0.533	DHTVSATHGDMDQNTR	109	37.4	0		595.592	1783.75	1784.76	3	-0.0005479	-0.307	303	318	20
5526	175	PREDICTED: eukaryotic initiation factor 4A-2 [Vitis vinifera]	gi|225442221	46932.2	0.533	ELAQQIEK	50	45.7	4.81		479.766	957.517	958.52	2	0.003558	3.712	119	126	20
5526	175	PREDICTED: eukaryotic initiation factor 4A-2 [Vitis vinifera]	gi|225442221	46932.2	0.533	FMNKPVR	35.2	45.2	0		446.247	890.479	891.487	2	-0.0007019	-0.7874	234	240	20
5526	175	PREDICTED: eukaryotic initiation factor 4A-2 [Vitis vinifera]	gi|225442221	46932.2	0.533	GFKDQIYDIFQLLPSK	40.8	43.7	12.6		638.016	1911.03	1912.02	3	0.01214	6.35	198	213	20
5526	175	PREDICTED: eukaryotic initiation factor 4A-2 [Vitis vinifera]	gi|225442221	46932.2	0.533	GIYAYGFEKPSAIQQR	114	44.9	13		609.988	1826.94	1827.94	3	0.01068	5.844	54	69	20
5526	175	PREDICTED: eukaryotic initiation factor 4A-2 [Vitis vinifera]	gi|225442221	46932.2	0.533	GLDVIQQAQSGTGK	66.4	45.5	9.43		701.373	1400.73	1401.73	2	0.005358	3.822	77	90	20
5526	175	PREDICTED: eukaryotic initiation factor 4A-2 [Vitis vinifera]	gi|225442221	46932.2	0.533	GVAINFVTR	47.8	44.8	4.68		488.783	975.552	976.557	2	0.001478	1.514	377	385	20
5526	175	PREDICTED: eukaryotic initiation factor 4A-2 [Vitis vinifera]	gi|225442221	46932.2	0.533	ILQTGVHVVVGTPGR	95.7	40.6	12.6		766.949	1531.88	1532.89	2	5.806e-05	0.03787	154	168	20
5526	175	PREDICTED: eukaryotic initiation factor 4A-2 [Vitis vinifera]	gi|225442221	46932.2	0.533	KGVAINFVTR	46.2	41.9	9.9		552.828	1103.64	1104.65	2	-0.002702	-2.446	376	385	20
5526	175	PREDICTED: eukaryotic initiation factor 4A-2 [Vitis vinifera]	gi|225442221	46932.2	0.533	KVDWLTDK	31.9	45.5	6.58		502.772	1003.53	1004.54	2	-0.003602	-3.586	291	298	20
5526	175	PREDICTED: eukaryotic initiation factor 4A-2 [Vitis vinifera]	gi|225442221	46932.2	0.533	LETLcDLYETLAITQSVIFVNTR	95.6	44.1	15	c5: Carbamidomethyl (+57.02)	900.477	2698.41	2699.4	3	0.01999	7.404	267	289	20
5526	175	PREDICTED: eukaryotic initiation factor 4A-2 [Vitis vinifera]	gi|225442221	46932.2	0.533	MFVLDEADEMLSR	77	42.9	0		778.366	1554.72	1555.71	2	0.01096	7.044	185	197	20
5526	175	PREDICTED: eukaryotic initiation factor 4A-2 [Vitis vinifera]	gi|225442221	46932.2	0.533	QSLRPDYIK	31.8	44.8	2.61		560.311	1118.61	1119.62	2	-0.002082	-1.86	176	184	20
5526	175	PREDICTED: eukaryotic initiation factor 4A-2 [Vitis vinifera]	gi|225442221	46932.2	0.533	RDELTLEGIK	62	45.9	7.59		587.327	1172.64	1173.65	2	-0.0006619	-0.564	245	254	20
5526	175	PREDICTED: eukaryotic initiation factor 4A-2 [Vitis vinifera]	gi|225442221	46932.2	0.533	VFDmLR	28.7	42.3	-0.123	m4: Oxidation (+15.99)	398.705	795.395	796.402	2	0.000263	0.3303	169	174	20
5526	175	PREDICTED: eukaryotic initiation factor 4A-2 [Vitis vinifera]	gi|225442221	46932.2	0.533	VHAcVGGTSVR	40.5	42.8	8.37	c4: Carbamidomethyl (+57.02)	381.529	1141.57	1142.57	3	-0.001243	-1.088	139	149	20
5526	175	PREDICTED: eukaryotic initiation factor 4A-2 [Vitis vinifera]	gi|225442221	46932.2	0.533	VLITTDLLAR	58.5	41.1	11.3		557.846	1113.68	1114.68	2	0.001538	1.38	332	341	20
5526	175	PREDICTED: eukaryotic initiation factor 4A-2 [Vitis vinifera]	gi|225442221	46932.2	0.533	VQVGVFSATmPPEALEITR	58.3	45.2	10.2	m10: Oxidation (+15.99)	687.698	2060.07	2061.07	3	0.009737	4.724	214	232	20
6736	176	hypothetical protein VITISV_024563 [Vitis vinifera]	gi|147856448,gi|225444613	92410.1	0.0447	LGVTQcTIAHALEK	40.7	44.3	7.58	c6: Carbamidomethyl (+57.02)	514.278	1539.81	1540.82	3	0.002657	1.724	427	440	2
6736	176	hypothetical protein VITISV_024563 [Vitis vinifera]	gi|147856448,gi|225444613	92410.1	0.0447	VVHGIDVFDPK	29.5	43.6	10.6		613.334	1224.65	1225.66	2	0.003798	3.099	508	518	2
6736	176	PREDICTED: ATP-dependent Clp protease ATP-binding subunit clpA homolog CD4A, chloroplastic-like [Vitis vinifera]	gi|225456471	102333	0.465	AETEAGDIGPmVTEVDIQHIVSAWTGIPVEK	101	44.9	11.9	m11: Oxidation (+15.99)	1103.55	3307.64	3308.64	3	0.009507	2.873	558	588	37
6736	176	PREDICTED: ATP-dependent Clp protease ATP-binding subunit clpA homolog CD4A, chloroplastic-like [Vitis vinifera]	gi|225456471	102333	0.465	AHPDVFNmmLQILEDGR	51.4	44.2	13	m8: Oxidation (+15.99), m9: Oxidation (+15.99)	673.326	2016.96	2017.95	3	0.01557	7.717	720	736	37
6736	176	PREDICTED: ATP-dependent Clp protease ATP-binding subunit clpA homolog CD4A, chloroplastic-like [Vitis vinifera]	gi|225456471	102333	0.465	AIDLIDEAGSR	55.2	45.4	11.1		580.302	1158.59	1159.6	2	0.0003581	0.3088	483	493	37
6736	176	PREDICTED: ATP-dependent Clp protease ATP-binding subunit clpA homolog CD4A, chloroplastic-like [Vitis vinifera]	gi|225456471	102333	0.465	AQISTLIDK	45.9	45.4	6.15		494.789	987.563	988.567	2	0.002738	2.77	543	551	37
6736	176	PREDICTED: ATP-dependent Clp protease ATP-binding subunit clpA homolog CD4A, chloroplastic-like [Vitis vinifera]	gi|225456471	102333	0.465	DIADImLK	33.5	45.8	4.13	m6: Oxidation (+15.99)	467.75	933.486	934.492	2	0.002023	2.165	822	829	37
6736	176	PREDICTED: ATP-dependent Clp protease ATP-binding subunit clpA homolog CD4A, chloroplastic-like [Vitis vinifera]	gi|225456471	102333	0.465	DIELQVTER	35.4	45.5	8.87		551.789	1101.56	1102.57	2	-0.003162	-2.868	839	847	37
6736	176	PREDICTED: ATP-dependent Clp protease ATP-binding subunit clpA homolog CD4A, chloroplastic-like [Vitis vinifera]	gi|225456471	102333	0.465	GEFEER	30.8	40.9	0		383.674	765.333	766.337	2	0.003338	4.356	347	352	37
6736	176	PREDICTED: ATP-dependent Clp protease ATP-binding subunit clpA homolog CD4A, chloroplastic-like [Vitis vinifera]	gi|225456471	102333	0.465	GELQcIGATTLDEYR	84.1	43.7	11.6	c5: Carbamidomethyl (+57.02)	863.412	1724.81	1725.81	2	0.004813	2.789	399	413	37
6736	176	PREDICTED: ATP-dependent Clp protease ATP-binding subunit clpA homolog CD4A, chloroplastic-like [Vitis vinifera]	gi|225456471	102333	0.465	GELQcIGATTLDEYRK	72.9	45	12.9	c5: Carbamidomethyl (+57.02)	618.642	1852.9	1853.91	3	0.004727	2.55	399	414	37
6736	176	PREDICTED: ATP-dependent Clp protease ATP-binding subunit clpA homolog CD4A, chloroplastic-like [Vitis vinifera]	gi|225456471	102333	0.465	HAQLPEEAR	59.6	44.1	10.4		525.771	1049.53	1050.53	2	0.002978	2.835	498	506	37
6736	176	PREDICTED: ATP-dependent Clp protease ATP-binding subunit clpA homolog CD4A, chloroplastic-like [Vitis vinifera]	gi|225456471	102333	0.465	IANGDVPETIEGK	93.3	44.6	11.6		671.848	1341.68	1342.69	2	0.003138	2.337	317	329	37
6736	176	PREDICTED: ATP-dependent Clp protease ATP-binding subunit clpA homolog CD4A, chloroplastic-like [Vitis vinifera]	gi|225456471	102333	0.465	IGFDLDYDEK	61	41.4	10.4		607.784	1213.55	1214.56	2	0.003658	3.012	770	779	37
6736	176	PREDICTED: ATP-dependent Clp protease ATP-binding subunit clpA homolog CD4A, chloroplastic-like [Vitis vinifera]	gi|225456471	102333	0.465	LAEEGKLDPVVGR	49.7	43.2	7.72		691.889	1381.76	1382.76	2	0.005678	4.106	265	277	37
6736	176	PREDICTED: ATP-dependent Clp protease ATP-binding subunit clpA homolog CD4A, chloroplastic-like [Vitis vinifera]	gi|225456471	102333	0.465	LDEMIVFR	53.3	45.1	0		511.77	1021.53	1022.53	2	-0.001042	-1.019	806	813	37
6736	176	PREDICTED: ATP-dependent Clp protease ATP-binding subunit clpA homolog CD4A, chloroplastic-like [Vitis vinifera]	gi|225456471	102333	0.465	LDMSEFmER	45.9	35.1	0	m7: Oxidation (+15.99)	587.249	1172.48	1173.49	2	-0.001037	-0.8836	670	678	37
6736	176	PREDICTED: ATP-dependent Clp protease ATP-binding subunit clpA homolog CD4A, chloroplastic-like [Vitis vinifera]	gi|225456471	102333	0.465	LDPVVGR	48.4	40	2.23		378.225	754.436	755.441	2	0.001598	2.115	271	277	37
6736	176	PREDICTED: ATP-dependent Clp protease ATP-binding subunit clpA homolog CD4A, chloroplastic-like [Vitis vinifera]	gi|225456471	102333	0.465	LIGSPPGYVGYTEGGQLTEAVR	96.6	45.3	10.7		1132.58	2263.15	2264.16	2	0.0007581	0.3348	684	705	37
6736	176	PREDICTED: ATP-dependent Clp protease ATP-binding subunit clpA homolog CD4A, chloroplastic-like [Vitis vinifera]	gi|225456471	102333	0.465	LLEDSMAEK	57.7	44.6	0		518.256	1034.5	1035.5	2	0.002498	2.412	873	881	37
6736	176	PREDICTED: ATP-dependent Clp protease ATP-binding subunit clpA homolog CD4A, chloroplastic-like [Vitis vinifera]	gi|225456471	102333	0.465	LMEEIK	30	45	0		381.707	761.4	762.407	2	0.0007781	1.021	356	361	37
6736	176	PREDICTED: ATP-dependent Clp protease ATP-binding subunit clpA homolog CD4A, chloroplastic-like [Vitis vinifera]	gi|225456471	102333	0.465	LSYQYISDR	36.7	42.7	5.16		572.785	1143.55	1144.56	2	-0.001342	-1.172	469	477	37
6736	176	PREDICTED: ATP-dependent Clp protease ATP-binding subunit clpA homolog CD4A, chloroplastic-like [Vitis vinifera]	gi|225456471	102333	0.465	MPTLEEYGTNLTK	59.3	44.4	0		748.872	1495.73	1496.73	2	0.005658	3.78	252	264	37
6736	176	PREDICTED: ATP-dependent Clp protease ATP-binding subunit clpA homolog CD4A, chloroplastic-like [Vitis vinifera]	gi|225456471	102333	0.465	mVGESTEAVGAGVGGGTTGNK	83.8	43.2	10	m1: Oxidation (+15.99)	632.298	1893.87	1894.88	3	-0.002033	-1.073	231	251	37
6736	176	PREDICTED: ATP-dependent Clp protease ATP-binding subunit clpA homolog CD4A, chloroplastic-like [Vitis vinifera]	gi|225456471	102333	0.465	NNPcLIGEPGVGK	48	44.4	9.79	c4: Carbamidomethyl (+57.02)	677.842	1353.67	1354.68	2	-0.001027	-0.7583	294	306	37
6736	176	PREDICTED: ATP-dependent Clp protease ATP-binding subunit clpA homolog CD4A, chloroplastic-like [Vitis vinifera]	gi|225456471	102333	0.465	NPNRPIASFIFSGPTGVGK	44	44.7	10		653.685	1958.03	1959.04	3	-0.005418	-2.766	631	649	37
6736	176	PREDICTED: ATP-dependent Clp protease ATP-binding subunit clpA homolog CD4A, chloroplastic-like [Vitis vinifera]	gi|225456471	102333	0.465	NTLLImTSNVGSSVIEK	60.8	45.2	11.4	m6: Oxidation (+15.99)	911.483	1820.95	1821.96	2	-0.003537	-1.941	749	765	37
6736	176	PREDICTED: ATP-dependent Clp protease ATP-binding subunit clpA homolog CD4A, chloroplastic-like [Vitis vinifera]	gi|225456471	102333	0.465	QYFRPEFLNR	28.6	44.6	4.92		457.239	1368.69	1369.7	3	0.0006421	0.4688	796	805	37
6736	176	PREDICTED: ATP-dependent Clp protease ATP-binding subunit clpA homolog CD4A, chloroplastic-like [Vitis vinifera]	gi|225456471	102333	0.465	RVIGQDEAVK	51.4	44.7	8.3		557.816	1113.62	1114.62	2	0.002838	2.546	607	616	37
6736	176	PREDICTED: ATP-dependent Clp protease ATP-binding subunit clpA homolog CD4A, chloroplastic-like [Vitis vinifera]	gi|225456471	102333	0.465	SLVTEELK	48.4	45.5	6.62		459.759	917.504	918.514	2	-0.003022	-3.29	788	795	37
6736	176	PREDICTED: ATP-dependent Clp protease ATP-binding subunit clpA homolog CD4A, chloroplastic-like [Vitis vinifera]	gi|225456471	102333	0.465	SmGINLK	36.3	44.6	2.13	m2: Oxidation (+15.99)	389.709	777.403	778.413	2	-0.002477	-3.182	141	147	37
6736	176	PREDICTED: ATP-dependent Clp protease ATP-binding subunit clpA homolog CD4A, chloroplastic-like [Vitis vinifera]	gi|225456471	102333	0.465	TAIAEGLAQR	39.8	45.1	8.01		515.287	1028.56	1029.57	2	-0.002582	-2.508	307	316	37
6736	176	PREDICTED: ATP-dependent Clp protease ATP-binding subunit clpA homolog CD4A, chloroplastic-like [Vitis vinifera]	gi|225456471	102333	0.465	VIGQDEAVK	27	44.4	5.6		479.762	957.509	958.52	2	-0.003922	-4.092	608	616	37
6736	176	PREDICTED: ATP-dependent Clp protease ATP-binding subunit clpA homolog CD4A, chloroplastic-like [Vitis vinifera]	gi|225456471	102333	0.465	VIMLAQEEAR	77.1	45.3	0		580.313	1158.61	1159.61	2	0.004638	4	102	111	37
6736	176	PREDICTED: ATP-dependent Clp protease ATP-binding subunit clpA homolog CD4A, chloroplastic-like [Vitis vinifera]	gi|225456471	102333	0.465	VITLDmGLLVAGTK	62.7	42.7	11.5	m6: Oxidation (+15.99)	723.915	1445.82	1446.82	2	-0.001657	-1.145	331	344	37
6736	176	PREDICTED: ATP-dependent Clp protease ATP-binding subunit clpA homolog CD4A, chloroplastic-like [Vitis vinifera]	gi|225456471	102333	0.465	VLELSLEEAR	61.2	44.7	11.8		579.821	1157.63	1158.64	2	-0.001422	-1.227	177	186	37
6736	176	PREDICTED: ATP-dependent Clp protease ATP-binding subunit clpA homolog CD4A, chloroplastic-like [Vitis vinifera]	gi|225456471	102333	0.465	VLENLGADPSNIR	63.6	44.1	11.8		699.37	1396.73	1397.74	2	-0.005582	-3.994	213	225	37
6736	176	PREDICTED: ATP-dependent Clp protease ATP-binding subunit clpA homolog CD4A, chloroplastic-like [Vitis vinifera]	gi|225456471	102333	0.465	VPEPSVDETIQILK	73.8	42.6	12.5		784.44	1566.87	1567.86	2	0.01462	9.323	431	444	37
6736	176	PREDICTED: ATP-dependent Clp protease ATP-binding subunit clpA homolog CD4A, chloroplastic-like [Vitis vinifera]	gi|225456471	102333	0.465	YTDEALVSAAR	61.1	44.6	11.3		598.306	1194.6	1195.6	2	0.009678	8.095	458	468	37
6736	176	PREDICTED: phospholipase D alpha 1 [Vitis vinifera]	gi|225442981,gi|84620126	92243.4	0.419	ASVPIQEILGGEEVDK	47.9	44.2	9.6		842.452	1682.89	1683.88	2	0.01632	9.691	111	126	28
6736	176	PREDICTED: phospholipase D alpha 1 [Vitis vinifera]	gi|225442981,gi|84620126	92243.4	0.419	DDNPIGATLIGR	69.1	43.7	10.5		414.555	1240.64	1241.65	3	0.001462	1.178	99	110	28
6736	176	PREDICTED: phospholipase D alpha 1 [Vitis vinifera]	gi|225442981,gi|84620126	92243.4	0.419	DNIIDR	35.1	43.9	0.356		373.196	744.378	745.384	2	0.001018	1.366	496	501	28
6736	176	PREDICTED: phospholipase D alpha 1 [Vitis vinifera]	gi|225442981,gi|84620126	92243.4	0.419	DSEIAmGGYQPYHLASR	108	41.9	12.3	m6: Oxidation (+15.99)	637.627	1909.86	1910.87	3	-0.004563	-2.388	691	707	28
6736	176	PREDICTED: phospholipase D alpha 1 [Vitis vinifera]	gi|225442981,gi|84620126	92243.4	0.419	GcHVSLYQDAHVPDNFVPK	38.6	44.4	10.1	c2: Carbamidomethyl (+57.02)	728.352	2182.03	2183.03	3	0.007767	3.558	181	199	28
6736	176	PREDICTED: phospholipase D alpha 1 [Vitis vinifera]	gi|225442981,gi|84620126	92243.4	0.419	IEDVGALHLIPK	68.1	41.6	11.5		652.882	1303.75	1304.76	2	-0.0001019	-0.07813	540	551	28
6736	176	PREDICTED: phospholipase D alpha 1 [Vitis vinifera]	gi|225442981,gi|84620126	92243.4	0.419	IPLADGK	55.5	39.4	4.05		357.213	712.412	713.419	2	-0.0003219	-0.4513	200	206	28
6736	176	PREDICTED: phospholipase D alpha 1 [Vitis vinifera]	gi|225442981,gi|84620126	92243.4	0.419	IVSFVGGIDLcDGR	106	45.5	12.2	c11: Carbamidomethyl (+57.02)	754.386	1506.76	1507.76	2	0.007953	5.275	354	367	28
6736	176	PREDICTED: phospholipase D alpha 1 [Vitis vinifera]	gi|225442981,gi|84620126	92243.4	0.419	IVVVDSEmPSGGSEK	102	44.3	12.8	m8: Oxidation (+15.99)	775.378	1548.74	1549.74	2	0.006343	4.093	337	351	28
6736	176	PREDICTED: phospholipase D alpha 1 [Vitis vinifera]	gi|225442981,gi|84620126	92243.4	0.419	KLVENIEETVGFGK	108	45.5	13.1		781.92	1561.82	1562.84	2	-0.01056	-6.758	34	47	28
6736	176	PREDICTED: phospholipase D alpha 1 [Vitis vinifera]	gi|225442981,gi|84620126	92243.4	0.419	KSGEYEPSEHPEPDTDYSR	87.9	36.7	11.7		741.654	2221.94	2222.95	3	-0.0008079	-0.3635	633	651	28
6736	176	PREDICTED: phospholipase D alpha 1 [Vitis vinifera]	gi|225442981,gi|84620126	92243.4	0.419	LQYFEVTADR	60.1	43.5	9		621.315	1240.61	1241.62	2	0.005978	4.815	148	157	28
6736	176	PREDICTED: phospholipase D alpha 1 [Vitis vinifera]	gi|225442981,gi|84620126	92243.4	0.419	LVENIEETVGFGK	91.7	45.8	12.1		717.877	1433.74	1434.75	2	-0.0009419	-0.6565	35	47	28
6736	176	PREDICTED: phospholipase D alpha 1 [Vitis vinifera]	gi|225442981,gi|84620126	92243.4	0.419	LYATIDIGR	54.3	44.3	10.2		511.289	1020.56	1021.57	2	0.003058	2.993	52	60	28
6736	176	PREDICTED: phospholipase D alpha 1 [Vitis vinifera]	gi|225442981,gi|84620126	92243.4	0.419	MIENEPSNPR	52	41.5	0		593.782	1185.55	1186.55	2	0.003538	2.982	68	77	28
6736	176	PREDICTED: phospholipase D alpha 1 [Vitis vinifera]	gi|225442981,gi|84620126	92243.4	0.419	MSLWYEHLGMLDESFLQPESK	68	43	0		847.396	2539.17	2540.18	3	-0.008868	-3.491	719	739	28
6736	176	PREDICTED: phospholipase D alpha 1 [Vitis vinifera]	gi|225442981,gi|84620126	92243.4	0.419	NYLTFFcLGNR	43.8	44.5	12.1	c7: Carbamidomethyl (+57.02)	702.845	1403.68	1404.67	2	0.01009	7.185	619	629	28
6736	176	PREDICTED: phospholipase D alpha 1 [Vitis vinifera]	gi|225442981,gi|84620126	92243.4	0.419	RcWEDVFDAINNAK	45.8	41.9	10.4	c2: Carbamidomethyl (+57.02)	579.936	1736.79	1737.8	3	-0.007993	-4.6	212	225	28
6736	176	PREDICTED: phospholipase D alpha 1 [Vitis vinifera]	gi|225442981,gi|84620126	92243.4	0.419	SEYLPPILTT	36.3	45.1	8.86		567.309	1132.6	1133.61	2	0.001278	1.127	803	812	28
6736	176	PREDICTED: phospholipase D alpha 1 [Vitis vinifera]	gi|225442981,gi|84620126	92243.4	0.419	SGEYEPSEHPEPDTDYSR	51.7	33.3	13.2		1047.93	2093.85	2094.85	2	0.004698	2.243	634	651	28
6736	176	PREDICTED: phospholipase D alpha 1 [Vitis vinifera]	gi|225442981,gi|84620126	92243.4	0.419	SIDGGAAFGFPETPEEAAR	89.6	43.1	10.8		961.449	1920.88	1921.89	2	-0.001182	-0.615	470	488	28
6736	176	PREDICTED: phospholipase D alpha 1 [Vitis vinifera]	gi|225442981,gi|84620126	92243.4	0.419	SIQDAYINAIR	68.8	45.3	10.7		632.341	1262.67	1263.67	2	0.004478	3.544	502	512	28
6736	176	PREDICTED: phospholipase D alpha 1 [Vitis vinifera]	gi|225442981,gi|84620126	92243.4	0.419	TMEMMYK	29.4	33.7	0		467.196	932.378	933.388	2	-0.002622	-2.809	596	602	28
6736	176	PREDICTED: phospholipase D alpha 1 [Vitis vinifera]	gi|225442981,gi|84620126	92243.4	0.419	TSVPLLK	34.8	41.7	5.28		379.245	756.476	757.482	2	0.0008381	1.106	279	285	28
6736	176	PREDICTED: phospholipase D alpha 1 [Vitis vinifera]	gi|225442981,gi|84620126	92243.4	0.419	VLmLVWDDR	51.9	45.4	10.1	m3: Oxidation (+15.99)	581.802	1161.59	1162.59	2	0.004823	4.149	270	278	28
6736	176	PREDICTED: phospholipase D alpha 1 [Vitis vinifera]	gi|225442981,gi|84620126	92243.4	0.419	WVEIVNEELKPIHGGSK	52.4	44.7	10.1		645.68	1934.02	1935.03	3	-0.007208	-3.725	127	143	28
6736	176	PREDICTED: phospholipase D alpha 1 [Vitis vinifera]	gi|225442981,gi|84620126	92243.4	0.419	YDTQFHSLFR	63.5	42.9	10.7		657.316	1312.62	1313.63	2	-0.003222	-2.453	368	377	28
6736	176	PREDICTED: phospholipase D alpha 1 [Vitis vinifera]	gi|225442981,gi|84620126	92243.4	0.419	YPIAVScGGDITELPGAEFFPDTK	82.2	44.9	12.8	c7: Carbamidomethyl (+57.02)	862.087	2583.24	2584.23	3	0.01865	7.216	772	795	28
6736	176	PREDICTED: stromal 70 kDa heat shock-related protein, chloroplastic-like [Vitis vinifera]	gi|225456004	75617.2	0.137	IINEPTAASLAYGFEK	19.8	45	7.36		862.455	1722.9	1723.89	2	0.01276	7.401	238	253	8
6736	176	PREDICTED: stromal 70 kDa heat shock-related protein, chloroplastic-like [Vitis vinifera]	gi|225456004	75617.2	0.137	KQDITITGASTLPTDEVER	85	45.3	8.94		692.031	2073.07	2074.07	3	0.01177	5.676	561	579	8
6736	176	PREDICTED: stromal 70 kDa heat shock-related protein, chloroplastic-like [Vitis vinifera]	gi|225456004	75617.2	0.137	LEcPAIGK	16.9	45	4.02	c3: Carbamidomethyl (+57.02)	444.236	886.457	887.466	2	-0.001027	-1.158	171	178	8
6736	176	PREDICTED: stromal 70 kDa heat shock-related protein, chloroplastic-like [Vitis vinifera]	gi|225456004	75617.2	0.137	MSEVDEESK	47.8	37.5	0		527.225	1052.44	1053.44	2	0.002418	2.295	147	155	8
6736	176	PREDICTED: stromal 70 kDa heat shock-related protein, chloroplastic-like [Vitis vinifera]	gi|225456004	75617.2	0.137	NQADSVVYQTEK	77.7	43.4	11.3		691.334	1380.65	1381.66	2	0.0005781	0.4184	602	613	8
6736	176	PREDICTED: stromal 70 kDa heat shock-related protein, chloroplastic-like [Vitis vinifera]	gi|225456004	75617.2	0.137	NTTLPTSK	24.3	44.9	4.39		431.239	860.463	861.468	2	0.002378	2.76	480	487	8
6736	176	PREDICTED: stromal 70 kDa heat shock-related protein, chloroplastic-like [Vitis vinifera]	gi|225456004	75617.2	0.137	TPVENSLR	35.8	43.9	7.08		458.247	914.48	915.489	2	-0.002202	-2.405	383	390	8
6736	176	PREDICTED: stromal 70 kDa heat shock-related protein, chloroplastic-like [Vitis vinifera]	gi|225456004	75617.2	0.137	TTPSVVAYTK	34.8	44.5	5.48		533.79	1065.57	1066.58	2	-0.005162	-4.84	105	114	8
6736	176	RecName: Full=S-adenosylmethionine synthase 2; Short=AdoMet synthase 2; AltName: Full=Methionine adenosyltransferase 2; Short=MAT 2	gi|223635284	43095.8	0.0382	FVIGGPHGDAGLTGR	66.9	44.7	10.3		485.256	1452.75	1453.75	3	-0.001588	-1.092	238	252	1
6736	176	hypothetical protein VITISV_018473 [Vitis vinifera]	gi|147821107,gi|225439223	81620.3	0.0354	IPSTEEIADR	85.1	45	9.29		565.789	1129.56	1130.57	2	0.0009781	0.8651	674	683	2
6736	176	hypothetical protein VITISV_018473 [Vitis vinifera]	gi|147821107,gi|225439223	81620.3	0.0354	YGAGIGPGVYDIHSPR	50.2	44.5	12.2		553.612	1657.81	1658.83	3	-0.007418	-4.472	658	673	2
6736	176	PREDICTED: eukaryotic initiation factor 4A-2 [Vitis vinifera]	gi|225442221	46932.2	0.228	DHTVSATHGDMDQNTR	82	37.7	0		595.592	1783.76	1784.76	3	0.0005321	0.2981	303	318	6
6736	176	PREDICTED: eukaryotic initiation factor 4A-2 [Vitis vinifera]	gi|225442221	46932.2	0.228	GIYAYGFEKPSAIQQR	95.1	44.9	10.6		609.988	1826.94	1827.94	3	0.01179	6.451	54	69	6
6736	176	PREDICTED: eukaryotic initiation factor 4A-2 [Vitis vinifera]	gi|225442221	46932.2	0.228	GVAINFVTR	43.7	43.8	5.82		488.784	975.554	976.557	2	0.003878	3.971	377	385	6
6736	176	PREDICTED: eukaryotic initiation factor 4A-2 [Vitis vinifera]	gi|225442221	46932.2	0.228	ILQTGVHVVVGTPGR	67.2	39.1	9.35		511.637	1531.89	1532.89	3	0.005772	3.765	154	168	6
6736	176	PREDICTED: eukaryotic initiation factor 4A-2 [Vitis vinifera]	gi|225442221	46932.2	0.228	RDELTLEGIK	31.7	45.3	3.47		587.329	1172.64	1173.65	2	0.002758	2.35	245	254	6
6736	176	PREDICTED: eukaryotic initiation factor 4A-2 [Vitis vinifera]	gi|225442221	46932.2	0.228	TATFcSGILQQLDYSLVQcQALVLAPTR	98.3	44.5	14.6	c5: Carbamidomethyl (+57.02), c19: Carbamidomethyl (+57.02)	1051.88	3152.61	3153.61	3	0.005431	1.722	91	118	6
5720	177	PREDICTED: LOW QUALITY PROTEIN: aminopeptidase N-like [Vitis vinifera]	gi|359474189	101270	0.506	AELLSTVEK	40.1	45.8	8.07		495.281	988.547	989.551	2	0.003098	3.131	680	688	36
5720	177	PREDICTED: LOW QUALITY PROTEIN: aminopeptidase N-like [Vitis vinifera]	gi|359474189	101270	0.506	DANDADFANFLLWYSQAGTPLVK	56	45.2	11.2		852.759	2555.26	2556.24	3	0.02233	8.736	440	462	36
5720	177	PREDICTED: LOW QUALITY PROTEIN: aminopeptidase N-like [Vitis vinifera]	gi|359474189	101270	0.506	DDTFVTR	37	42.1	5.09		427.206	852.398	853.405	2	-0.0003419	-0.4007	201	207	36
5720	177	PREDICTED: LOW QUALITY PROTEIN: aminopeptidase N-like [Vitis vinifera]	gi|359474189	101270	0.506	DDVLADFYSK	43.2	41.6	9.75		586.779	1171.54	1172.55	2	0.004118	3.512	756	765	36
5720	177	PREDICTED: LOW QUALITY PROTEIN: aminopeptidase N-like [Vitis vinifera]	gi|359474189	101270	0.506	DQEFSSDMGSR	56.1	32.8	0		629.752	1257.49	1258.5	2	-0.003982	-3.164	330	340	36
5720	177	PREDICTED: LOW QUALITY PROTEIN: aminopeptidase N-like [Vitis vinifera]	gi|359474189	101270	0.506	EEEFLFSDISEKPIASLLR	9.61	45.1	5.89		741.723	2222.15	2223.15	3	-0.0007879	-0.3544	542	560	36
5720	177	PREDICTED: LOW QUALITY PROTEIN: aminopeptidase N-like [Vitis vinifera]	gi|359474189	101270	0.506	EGLTVFR	49.1	44.6	2.77		411.229	820.444	821.452	2	0.0001181	0.1437	323	329	36
5720	177	PREDICTED: LOW QUALITY PROTEIN: aminopeptidase N-like [Vitis vinifera]	gi|359474189	101270	0.506	ELKEEDYVLSPR	68	45.7	9.96		739.386	1476.76	1477.75	2	0.0104	7.036	70	81	36
5720	177	PREDICTED: LOW QUALITY PROTEIN: aminopeptidase N-like [Vitis vinifera]	gi|359474189	101270	0.506	EMPLSSVYHDGTLQSVVSNDQPTYTTVLR	44.7	45	0		1079.87	3236.58	3237.57	3	0.009552	2.95	509	537	36
5720	177	PREDICTED: LOW QUALITY PROTEIN: aminopeptidase N-like [Vitis vinifera]	gi|359474189	101270	0.506	EPmFIPVAVGFLDSTGK	39.5	45.2	9.41	m3: Oxidation (+15.99)	608.645	1822.91	1823.93	3	-0.003263	-1.789	492	508	36
5720	177	PREDICTED: LOW QUALITY PROTEIN: aminopeptidase N-like [Vitis vinifera]	gi|359474189	101270	0.506	FLGEmVVQLDK	52.1	44.7	9.18	m5: Oxidation (+15.99)	647.838	1293.66	1294.67	2	-0.002377	-1.836	833	843	36
5720	177	PREDICTED: LOW QUALITY PROTEIN: aminopeptidase N-like [Vitis vinifera]	gi|359474189	101270	0.506	FSQEVPPTPGQPVK	25	44.9	7.89		755.897	1509.78	1510.79	2	-0.003582	-2.371	478	491	36
5720	177	PREDICTED: LOW QUALITY PROTEIN: aminopeptidase N-like [Vitis vinifera]	gi|359474189	101270	0.506	GmDLYFK	34	40.8	4.17	m2: Oxidation (+15.99)	445.212	888.409	889.413	2	0.004263	4.793	416	422	36
5720	177	PREDICTED: LOW QUALITY PROTEIN: aminopeptidase N-like [Vitis vinifera]	gi|359474189	101270	0.506	GYSAPIR	35.3	45.3	-0.873		382.209	762.403	763.41	2	0.0009181	1.203	561	567	36
5720	177	PREDICTED: LOW QUALITY PROTEIN: aminopeptidase N-like [Vitis vinifera]	gi|359474189	101270	0.506	INPQVASR	50.5	42.8	4.86		442.749	883.484	884.495	2	-0.003262	-3.688	844	851	36
5720	177	PREDICTED: LOW QUALITY PROTEIN: aminopeptidase N-like [Vitis vinifera]	gi|359474189	101270	0.506	ITFYQDRPDIMAK	42.7	44.5	0		533.271	1596.79	1597.8	3	-0.006008	-3.76	131	143	36
5720	177	PREDICTED: LOW QUALITY PROTEIN: aminopeptidase N-like [Vitis vinifera]	gi|359474189	101270	0.506	ITVLPR	43.1	37.4	1.75		349.732	697.45	698.456	2	0.0009981	1.429	39	44	36
5720	177	PREDICTED: LOW QUALITY PROTEIN: aminopeptidase N-like [Vitis vinifera]	gi|359474189	101270	0.506	IWTPAQDVPR	56.5	43.9	11		591.816	1181.62	1182.63	2	-0.001822	-1.541	216	225	36
5720	177	PREDICTED: LOW QUALITY PROTEIN: aminopeptidase N-like [Vitis vinifera]	gi|359474189	101270	0.506	LDTDLTDSDLFFLLAHDSDEFNR	88.8	42.8	12.4		900.42	2698.24	2699.25	3	-0.001978	-0.7328	568	590	36
5720	177	PREDICTED: LOW QUALITY PROTEIN: aminopeptidase N-like [Vitis vinifera]	gi|359474189	101270	0.506	NLLNHPAFDLR	38.2	44.1	8.19		655.356	1308.7	1309.7	2	0.003398	2.595	794	804	36
5720	177	PREDICTED: LOW QUALITY PROTEIN: aminopeptidase N-like [Vitis vinifera]	gi|359474189	101270	0.506	NTSLEGLYK	40.8	44.4	7.19		512.771	1023.53	1024.53	2	0.002998	2.926	106	114	36
5720	177	PREDICTED: LOW QUALITY PROTEIN: aminopeptidase N-like [Vitis vinifera]	gi|359474189	101270	0.506	QLASELR	48.8	45.7	1.69		408.734	815.453	816.457	2	0.002798	3.427	673	679	36
5720	177	PREDICTED: LOW QUALITY PROTEIN: aminopeptidase N-like [Vitis vinifera]	gi|359474189	101270	0.506	SILLDSSLDK	46.2	45.2	8.82		545.804	1089.59	1090.6	2	0.002338	2.144	627	636	36
5720	177	PREDICTED: LOW QUALITY PROTEIN: aminopeptidase N-like [Vitis vinifera]	gi|359474189	101270	0.506	SILLDSSLDKEFIAK	59	42.5	10.3		560.317	1677.93	1678.93	3	0.008622	5.135	627	641	36
5720	177	PREDICTED: LOW QUALITY PROTEIN: aminopeptidase N-like [Vitis vinifera]	gi|359474189	101270	0.506	SLYPVLLSNGNLIEHGDLEGGK	104	45	12.1		775.738	2324.19	2325.21	3	-0.009458	-4.068	153	174	36
5720	177	PREDICTED: LOW QUALITY PROTEIN: aminopeptidase N-like [Vitis vinifera]	gi|359474189	101270	0.506	SSEDYVFNHPNMAR	32.9	39.7	0		556.249	1665.72	1666.73	3	0.004132	2.479	691	704	36
5720	177	PREDICTED: LOW QUALITY PROTEIN: aminopeptidase N-like [Vitis vinifera]	gi|359474189	101270	0.506	SSGNFcTQcEAEGFR	69.1	31	12.9	c6: Carbamidomethyl (+57.02), c9: Carbamidomethyl (+57.02)	875.349	1748.68	1749.7	2	-0.004513	-2.579	115	129	36
5720	177	PREDICTED: LOW QUALITY PROTEIN: aminopeptidase N-like [Vitis vinifera]	gi|359474189	101270	0.506	TAANMTEQFAALAAIAQIPGK	63.5	45.6	0		1059.06	2116.11	2117.11	2	0.0124	5.856	733	753	36
5720	177	PREDICTED: LOW QUALITY PROTEIN: aminopeptidase N-like [Vitis vinifera]	gi|359474189	101270	0.506	TLLGSQGFR	52.2	43.9	5.62		489.772	977.529	978.537	2	-0.0002419	-0.2472	406	414	36
5720	177	PREDICTED: LOW QUALITY PROTEIN: aminopeptidase N-like [Vitis vinifera]	gi|359474189	101270	0.506	TRDDVLADFYSK	54.9	43.7	9.79		715.353	1428.69	1429.7	2	0.002758	1.929	754	765	36
5720	177	PREDICTED: LOW QUALITY PROTEIN: aminopeptidase N-like [Vitis vinifera]	gi|359474189	101270	0.506	VEGSPFPLVLDGVDLK	77.7	44.1	12.4		562.313	1683.92	1684.92	3	0.009882	5.865	45	60	36
5720	177	PREDICTED: LOW QUALITY PROTEIN: aminopeptidase N-like [Vitis vinifera]	gi|359474189	101270	0.506	VTSSYNAEAHTYSLK	85.3	44	12.4		557.607	1669.8	1670.8	3	0.005222	3.125	463	477	36
5720	177	PREDICTED: LOW QUALITY PROTEIN: aminopeptidase N-like [Vitis vinifera]	gi|359474189	101270	0.506	VYSLIGGFcGSPVNFHAK	15.5	45.3	5.19	c9: Carbamidomethyl (+57.02)	651.662	1951.96	1952.97	3	0.003417	1.75	809	826	36
5720	177	PREDICTED: LOW QUALITY PROTEIN: aminopeptidase N-like [Vitis vinifera]	gi|359474189	101270	0.506	WEAGQVLAR	41.6	44.9	4.46		515.278	1028.54	1029.55	2	0.0009381	0.9111	591	599	36
5720	177	PREDICTED: LOW QUALITY PROTEIN: aminopeptidase N-like [Vitis vinifera]	gi|359474189	101270	0.506	WFALQAMADIPQNVENVR	51.1	45.3	0		701.354	2101.04	2102.05	3	-0.003018	-1.436	776	793	36
5720	177	PREDICTED: LOW QUALITY PROTEIN: aminopeptidase N-like [Vitis vinifera]	gi|359474189	101270	0.506	WQQDFLVVNK	41.9	46	9.54		638.837	1275.66	1276.67	2	-0.001922	-1.505	766	775	36
5720	177	PREDICTED: ATP-dependent Clp protease ATP-binding subunit clpA homolog CD4A, chloroplastic-like [Vitis vinifera]	gi|225456471	102333	0.0618	LIGSPPGYVGYTEGGQLTEAVR	70.9	45.3	10.6		1132.58	2263.14	2264.16	2	-0.005862	-2.589	684	705	2
5720	177	PREDICTED: ATP-dependent Clp protease ATP-binding subunit clpA homolog CD4A, chloroplastic-like [Vitis vinifera]	gi|225456471	102333	0.0618	mVGESTEAVGAGVGGGTTGNK	21.8	42.9	9.44	m1: Oxidation (+15.99)	632.297	1893.87	1894.88	3	-0.005693	-3.004	231	251	2
5720	177	PREDICTED: phospholipase D alpha 1 [Vitis vinifera]	gi|225442981,gi|84620126	92243.4	0.255	DDNPIGATLIGR	40.9	43.5	9.8		621.327	1240.64	1241.65	2	-0.001682	-1.355	99	110	16
5720	177	PREDICTED: phospholipase D alpha 1 [Vitis vinifera]	gi|225442981,gi|84620126	92243.4	0.255	GcHVSLYQDAHVPDNFVPK	31.9	44	10.5	c2: Carbamidomethyl (+57.02)	728.348	2182.02	2183.03	3	-0.003363	-1.541	181	199	16
5720	177	PREDICTED: phospholipase D alpha 1 [Vitis vinifera]	gi|225442981,gi|84620126	92243.4	0.255	GIEDDPR	27.3	38.8	0		401.19	800.365	801.374	2	-0.001362	-1.7	612	618	16
5720	177	PREDICTED: phospholipase D alpha 1 [Vitis vinifera]	gi|225442981,gi|84620126	92243.4	0.255	IPLADGK	55.2	39	4.2		357.214	712.414	713.419	2	0.001858	2.604	200	206	16
5720	177	PREDICTED: phospholipase D alpha 1 [Vitis vinifera]	gi|225442981,gi|84620126	92243.4	0.255	IVSFVGGIDLcDGR	63.6	45.4	11.3	c11: Carbamidomethyl (+57.02)	754.384	1506.75	1507.76	2	0.003653	2.423	354	367	16
5720	177	PREDICTED: phospholipase D alpha 1 [Vitis vinifera]	gi|225442981,gi|84620126	92243.4	0.255	IVVVDSEMPSGGSEK	71.6	44.6	0		767.38	1532.75	1533.75	2	0.006138	4.002	337	351	16
5720	177	PREDICTED: phospholipase D alpha 1 [Vitis vinifera]	gi|225442981,gi|84620126	92243.4	0.255	LEGPIAWDVLFNFEQR	73.6	45.5	9.77		645.338	1932.99	1933.98	3	0.01794	9.277	413	428	16
5720	177	PREDICTED: phospholipase D alpha 1 [Vitis vinifera]	gi|225442981,gi|84620126	92243.4	0.255	LQYFEVTADR	45.5	43.6	9.56		621.312	1240.61	1241.62	2	0.0009181	0.7394	148	157	16
5720	177	PREDICTED: phospholipase D alpha 1 [Vitis vinifera]	gi|225442981,gi|84620126	92243.4	0.255	LVENIEETVGFGK	53.9	45.5	9.73		717.881	1433.75	1434.75	2	0.007218	5.031	35	47	16
5720	177	PREDICTED: phospholipase D alpha 1 [Vitis vinifera]	gi|225442981,gi|84620126	92243.4	0.255	LYATIDIGR	58.5	44.4	5.87		511.288	1020.56	1021.57	2	0.001578	1.545	52	60	16
5720	177	PREDICTED: phospholipase D alpha 1 [Vitis vinifera]	gi|225442981,gi|84620126	92243.4	0.255	MIENEPSNPR	56.4	41.5	0		593.779	1185.54	1186.55	2	-0.0006619	-0.5579	68	77	16
5720	177	PREDICTED: phospholipase D alpha 1 [Vitis vinifera]	gi|225442981,gi|84620126	92243.4	0.255	SGEYEPSEHPEPDTDYSR	18.5	33.3	10.5		698.957	2093.85	2094.85	3	0.004032	1.925	634	651	16
5720	177	PREDICTED: phospholipase D alpha 1 [Vitis vinifera]	gi|225442981,gi|84620126	92243.4	0.255	SIDGGAAFGFPETPEEAAR	84.4	42.9	11.1		961.447	1920.88	1921.89	2	-0.006782	-3.529	470	488	16
5720	177	PREDICTED: phospholipase D alpha 1 [Vitis vinifera]	gi|225442981,gi|84620126	92243.4	0.255	SIQDAYINAIR	55.8	45.3	11.4		632.34	1262.66	1263.67	2	0.002878	2.278	502	512	16
5720	177	PREDICTED: phospholipase D alpha 1 [Vitis vinifera]	gi|225442981,gi|84620126	92243.4	0.255	TSVPLLK	40.5	41.7	3.57		379.245	756.475	757.482	2	0.0004581	0.6047	279	285	16
5720	177	PREDICTED: phospholipase D alpha 1 [Vitis vinifera]	gi|225442981,gi|84620126	92243.4	0.255	YDTQFHSLFR	31.1	43	0.984		438.549	1312.62	1313.63	3	0.003812	2.902	368	377	16
5720	177	PREDICTED: elongation factor 2-like isoform 1 [Vitis vinifera]	gi|225462164	93961.6	0.0712	EGALAEENmR	34.8	39.6	5.34	m9: Oxidation (+15.99)	568.255	1134.5	1135.5	2	-0.001657	-1.459	674	683	7
5720	177	PREDICTED: elongation factor 2-like isoform 1 [Vitis vinifera]	gi|225462164	93961.6	0.0712	FGVDESK	34	41.6	3.69		391.191	780.367	781.373	2	0.001258	1.61	233	239	7
5720	177	PREDICTED: elongation factor 2-like isoform 1 [Vitis vinifera]	gi|225462164	93961.6	0.0712	FSVSPVVR	27.6	43.5	5.36		445.759	889.504	890.509	2	0.001418	1.592	483	490	7
5720	177	PREDICTED: elongation factor 2-like isoform 1 [Vitis vinifera]	gi|225462164	93961.6	0.0712	GGGQVIPTAR	34.2	42.2	4.94		478.271	954.527	955.532	2	0.002418	2.531	702	711	7
5720	177	PREDICTED: elongation factor 2-like isoform 1 [Vitis vinifera]	gi|225462164	93961.6	0.0712	ILSEEFGWDK	45	44	9.61		612.299	1222.58	1223.59	2	-0.003042	-2.486	619	628	7
5720	177	PREDICTED: elongation factor 2-like isoform 1 [Vitis vinifera]	gi|225462164	93961.6	0.0712	SDPVVSFR	37.8	45	5.1		453.738	905.461	906.468	2	-0.0001619	-0.1787	558	565	7
5720	177	PREDICTED: elongation factor 2-like isoform 1 [Vitis vinifera]	gi|225462164	93961.6	0.0712	VASDLPK	39.5	41.4	0.434		365.212	728.409	729.414	2	0.002258	3.096	497	503	7
5720	177	PREDICTED: isoflavone reductase homolog P3 [Vitis vinifera]	gi|225458243,gi|76559892	33788.2	0.0942	ESTIADPVK	60.5	44.4	4.89		480.255	958.495	959.505	2	-0.002642	-2.753	37	45	3
5720	177	PREDICTED: isoflavone reductase homolog P3 [Vitis vinifera]	gi|225458243,gi|76559892	33788.2	0.0942	VIILGDGNPK	46.4	38.5	7.1		513.304	1024.59	1025.6	2	0.0006181	0.6026	176	185	3
5720	177	PREDICTED: isoflavone reductase homolog P3 [Vitis vinifera]	gi|225458243,gi|76559892	33788.2	0.0942	VYVPEEQVLK	26.2	44.9	7.52		602.336	1202.66	1203.66	2	0.001638	1.361	241	250	3
5720	177	PREDICTED: eukaryotic initiation factor 4A-2 [Vitis vinifera]	gi|225442221	46932.2	0.0605	ILQTGVHVVVGTPGR	44.2	40.5	8.27		511.635	1531.88	1532.89	3	0.0009421	0.6146	154	168	2
5720	177	PREDICTED: eukaryotic initiation factor 4A-2 [Vitis vinifera]	gi|225442221	46932.2	0.0605	VLITTDLLAR	52.5	40.9	6.45		557.848	1113.68	1114.68	2	0.005578	5.004	332	341	2
2629	178	PREDICTED: chaperonin CPN60-2, mitochondrial isoform 1 [Vitis vinifera]	gi|225433375	61352.9	0.0313	LSGGVAVLK	49.9	42.1	7.75		422.269	842.523	843.53	2	-0.0001419	-0.1683	403	411	1
2629	178	PREDICTED: chaperonin CPN60-2, mitochondrial isoform 1 [Vitis vinifera]	gi|225433375	61352.9	0.0313	VTDALNATK	39	46.5	4.81		466.753	931.492	932.505	2	-0.005162	-5.536	427	435	1
2629	178	PREDICTED: tubulin alpha chain [Vitis vinifera]	gi|225429189	49536.8	0.198	EDLAALEK	48.8	44.5	6.35		444.738	887.461	888.467	2	0.001158	1.303	423	430	5
2629	178	PREDICTED: tubulin alpha chain [Vitis vinifera]	gi|225429189	49536.8	0.198	LSVDYGK	29.5	43.2	1.38		391.208	780.402	781.409	2	-0.0001619	-0.2072	157	163	5
2629	178	PREDICTED: tubulin alpha chain [Vitis vinifera]	gi|225429189	49536.8	0.198	LVSQVISSLTASLR	59.4	40	9.8		737.435	1472.85	1473.86	2	-0.001462	-0.9919	230	243	5
2629	178	PREDICTED: tubulin alpha chain [Vitis vinifera]	gi|225429189	49536.8	0.198	QLFHPEQLISGK	34.3	43.2	6.21		466.26	1395.76	1396.76	3	0.006542	4.684	85	96	5
2629	178	PREDICTED: tubulin alpha chain [Vitis vinifera]	gi|225429189	49536.8	0.198	SLDIERPTYTNLNR	28.3	45.6	9.69		564.625	1690.85	1691.87	3	-0.01086	-6.418	216	229	5
2629	178	PREDICTED: ruBisCO large subunit-binding protein subunit alpha, chloroplastic-like [Vitis vinifera]	gi|359479362	61967	0.676	AALQAGIDK	61	43.7	4.85		443.753	885.492	886.499	2	-2.194e-05	-0.02475	59	67	34
2629	178	PREDICTED: ruBisCO large subunit-binding protein subunit alpha, chloroplastic-like [Vitis vinifera]	gi|359479362	61967	0.676	AcEWAVGYNAMTDK	77.8	36.5	0	c2: Carbamidomethyl (+57.02)	808.343	1614.67	1615.69	2	-0.01005	-6.219	517	530	34
2629	178	PREDICTED: ruBisCO large subunit-binding protein subunit alpha, chloroplastic-like [Vitis vinifera]	gi|359479362	61967	0.676	AcEWAVGYNAMTDKYENLVEAGVIDPAK	76.3	44	0	c2: Carbamidomethyl (+57.02)	1038.83	3113.47	3114.45	3	0.01829	5.872	517	544	34
2629	178	PREDICTED: ruBisCO large subunit-binding protein subunit alpha, chloroplastic-like [Vitis vinifera]	gi|359479362	61967	0.676	AIELADAmENAGAALIR	64	45.4	9.72	m8: Oxidation (+15.99)	872.952	1743.89	1744.89	2	0.007263	4.162	103	119	34
2629	178	PREDICTED: ruBisCO large subunit-binding protein subunit alpha, chloroplastic-like [Vitis vinifera]	gi|359479362	61967	0.676	ALVAPASLIAHNAGVEGEVVVEK	86.7	42.6	13.2		1137.13	2272.24	2273.25	2	-0.003602	-1.584	492	514	34
2629	178	PREDICTED: ruBisCO large subunit-binding protein subunit alpha, chloroplastic-like [Vitis vinifera]	gi|359479362	61967	0.676	APGFGER	37.2	44.6	1.46		367.184	732.353	733.363	2	-0.002922	-3.984	322	328	34
2629	178	PREDICTED: ruBisCO large subunit-binding protein subunit alpha, chloroplastic-like [Vitis vinifera]	gi|359479362	61967	0.676	APVAAPPQGLTI	56.1	42.1	10.2		567.835	1133.65	1134.65	2	0.009978	8.794	575	586	34
2629	178	PREDICTED: ruBisCO large subunit-binding protein subunit alpha, chloroplastic-like [Vitis vinifera]	gi|359479362	61967	0.676	ARPVEGGDDIK	57.9	43.1	9.57		578.803	1155.59	1156.6	2	0.001798	1.555	179	189	34
2629	178	PREDICTED: ruBisCO large subunit-binding protein subunit alpha, chloroplastic-like [Vitis vinifera]	gi|359479362	61967	0.676	AVASISAGNDEFIGSmIADAINK	122	45.1	10.3	m16: Oxidation (+15.99)	1155.57	2309.12	2310.13	2	0.001863	0.8065	190	212	34
2629	178	PREDICTED: ruBisCO large subunit-binding protein subunit alpha, chloroplastic-like [Vitis vinifera]	gi|359479362	61967	0.676	cALQNAASVAGMVLTTQAIVVEK	77.1	44.7	0	c1: Carbamidomethyl (+57.02)	792.086	2373.24	2374.25	3	-0.004133	-1.741	548	570	34
2629	178	PREDICTED: ruBisCO large subunit-binding protein subunit alpha, chloroplastic-like [Vitis vinifera]	gi|359479362	61967	0.676	DKLEDADER	65.5	40.7	11.7		545.753	1089.49	1090.5	2	-0.002222	-2.038	475	483	34
2629	178	PREDICTED: ruBisCO large subunit-binding protein subunit alpha, chloroplastic-like [Vitis vinifera]	gi|359479362	61967	0.676	DSTTIIADAASK	64.6	45.1	10.1		596.808	1191.6	1192.61	2	0.001898	1.592	372	383	34
2629	178	PREDICTED: ruBisCO large subunit-binding protein subunit alpha, chloroplastic-like [Vitis vinifera]	gi|359479362	61967	0.676	DSTTIIADAASKDEIQAR	73.5	45.5	12		635.658	1903.95	1904.96	3	0.001732	0.9092	372	389	34
2629	178	PREDICTED: ruBisCO large subunit-binding protein subunit alpha, chloroplastic-like [Vitis vinifera]	gi|359479362	61967	0.676	EIAFDQSSR	59.3	43	7.69		526.758	1051.5	1052.5	2	0.007458	7.086	50	58	34
2629	178	PREDICTED: ruBisCO large subunit-binding protein subunit alpha, chloroplastic-like [Vitis vinifera]	gi|359479362	61967	0.676	ELAETDSVYDTEK	74.5	41.3	12.6		750.343	1498.67	1499.67	2	0.004378	2.919	396	408	34
2629	178	PREDICTED: ruBisCO large subunit-binding protein subunit alpha, chloroplastic-like [Vitis vinifera]	gi|359479362	61967	0.676	GILNVAAIK	31.5	40.5	7.7		449.79	897.566	898.572	2	0.001218	1.356	313	321	34
2629	178	PREDICTED: ruBisCO large subunit-binding protein subunit alpha, chloroplastic-like [Vitis vinifera]	gi|359479362	61967	0.676	GYISPQFVTNPEK	78.4	45.2	12.1		740.38	1478.75	1479.75	2	0.004818	3.256	242	254	34
2629	178	PREDICTED: ruBisCO large subunit-binding protein subunit alpha, chloroplastic-like [Vitis vinifera]	gi|359479362	61967	0.676	KELAETDSVYDTEK	81.6	44	12.5		543.264	1626.77	1627.77	3	0.007502	4.609	395	408	34
2629	178	PREDICTED: ruBisCO large subunit-binding protein subunit alpha, chloroplastic-like [Vitis vinifera]	gi|359479362	61967	0.676	KVTITK	35.3	36.5	2.4		345.231	688.448	689.456	2	-8.194e-05	-0.1188	366	371	34
2629	178	PREDICTED: ruBisCO large subunit-binding protein subunit alpha, chloroplastic-like [Vitis vinifera]	gi|359479362	61967	0.676	LADAVGLTLGPR	77.2	40.6	12		591.847	1181.68	1182.68	2	0.002198	1.859	68	79	34
2629	178	PREDICTED: ruBisCO large subunit-binding protein subunit alpha, chloroplastic-like [Vitis vinifera]	gi|359479362	61967	0.676	LGADIVQK	55.5	43.6	7.05		422.251	842.488	843.494	2	0.001298	1.539	484	491	34
2629	178	PREDICTED: ruBisCO large subunit-binding protein subunit alpha, chloroplastic-like [Vitis vinifera]	gi|359479362	61967	0.676	LGLLSVTSGANPVSIK	108	41.4	11.9		778.457	1554.9	1555.91	2	0.0005181	0.333	146	161	34
2629	178	PREDICTED: ruBisCO large subunit-binding protein subunit alpha, chloroplastic-like [Vitis vinifera]	gi|359479362	61967	0.676	LGLLSVTSGANPVSIKK	43.4	36.7	10		562.008	1683	1684	3	0.008722	5.179	146	162	34
2629	178	PREDICTED: ruBisCO large subunit-binding protein subunit alpha, chloroplastic-like [Vitis vinifera]	gi|359479362	61967	0.676	LIAEFENAR	55	45.9	9.21		531.785	1061.56	1062.56	2	0.004758	4.478	255	263	34
2629	178	PREDICTED: ruBisCO large subunit-binding protein subunit alpha, chloroplastic-like [Vitis vinifera]	gi|359479362	61967	0.676	LSGGVAVIK	49.9	42.1	7.75		422.269	842.523	843.53	2	-0.0001419	-0.1683	416	424	34
2629	178	PREDICTED: ruBisCO large subunit-binding protein subunit alpha, chloroplastic-like [Vitis vinifera]	gi|359479362	61967	0.676	NATFAAIEEGIVPGGGAAFVHLSTYVPAIK	12.3	42.8	8.2		1000.87	2999.59	3000.58	3	0.01239	4.13	445	474	34
2629	178	PREDICTED: ruBisCO large subunit-binding protein subunit alpha, chloroplastic-like [Vitis vinifera]	gi|359479362	61967	0.676	NVVLDEFGSPK	58.3	45.5	7.78		402.215	1203.62	1204.62	3	0.008422	6.991	82	92	34
2629	178	PREDICTED: ruBisCO large subunit-binding protein subunit alpha, chloroplastic-like [Vitis vinifera]	gi|359479362	61967	0.676	SPLLIVAEDVTGEALATLVVNK	114	39.5	13.7		1126.64	2251.27	2252.28	2	1.806e-05	0.008018	289	310	34
2629	178	PREDICTED: ruBisCO large subunit-binding protein subunit alpha, chloroplastic-like [Vitis vinifera]	gi|359479362	61967	0.676	TNDSAGDGTTTASVLAR	106	44	14.7		818.893	1635.77	1636.78	2	0.001698	1.037	125	141	34
2629	178	PREDICTED: ruBisCO large subunit-binding protein subunit alpha, chloroplastic-like [Vitis vinifera]	gi|359479362	61967	0.676	VGAATETELEDR	83.7	43.7	11.1		645.815	1289.61	1290.62	2	0.004878	3.78	425	436	34
2629	178	PREDICTED: ruBisCO large subunit-binding protein subunit alpha, chloroplastic-like [Vitis vinifera]	gi|359479362	61967	0.676	VGAATETELEDRK	32.3	45.2	9.45		473.575	1417.7	1418.71	3	-0.002648	-1.866	425	437	34
2629	178	PREDICTED: ruBisCO large subunit-binding protein subunit alpha, chloroplastic-like [Vitis vinifera]	gi|359479362	61967	0.676	VLVTDQK	36.2	48.2	3.74		401.739	801.463	802.467	2	0.003338	4.16	264	270	34
2629	178	PREDICTED: ruBisCO large subunit-binding protein subunit alpha, chloroplastic-like [Vitis vinifera]	gi|359479362	61967	0.676	VVNDGVTIAR	49.7	45.2	6.54		348.534	1042.58	1043.58	3	0.004292	4.113	93	102	34
2629	178	PREDICTED: ruBisCO large subunit-binding protein subunit alpha, chloroplastic-like [Vitis vinifera]	gi|359479362	61967	0.676	YENLVEAGVIDPAK	90.8	45.8	10.3		759.398	1516.78	1517.78	2	0.003558	2.344	531	544	34
2629	178	PREDICTED: tubulin beta-1 chain [Vitis vinifera]	gi|225440131	50228.2	0.0626	FPGQLNSDLR	64.7	45.5	9.36		573.798	1145.58	1146.59	2	-0.002182	-1.903	242	251	3
2629	178	PREDICTED: tubulin beta-1 chain [Vitis vinifera]	gi|225440131	50228.2	0.0626	IREEYPDR	11.6	44.7	4.83		359.849	1076.52	1077.53	3	-0.001558	-1.446	155	162	3
2629	178	PREDICTED: tubulin beta-1 chain [Vitis vinifera]	gi|225440131	50228.2	0.0626	LAVNLIPFPR	57	38.3	12.2		570.35	1138.69	1139.69	2	-0.0006019	-0.5282	253	262	3
2629	178	PREDICTED: ruBisCO large subunit-binding protein subunit beta, chloroplastic [Vitis vinifera]	gi|225435794	64590.5	0.215	ALSYPLK	47	40.7	1.24		396.236	790.458	791.466	2	-0.001022	-1.291	510	516	11
2629	178	PREDICTED: ruBisCO large subunit-binding protein subunit beta, chloroplastic [Vitis vinifera]	gi|225435794	64590.5	0.215	APGFGER	37.2	44.6	1.46		367.184	732.353	733.363	2	-0.002922	-3.984	340	346	11
2629	178	PREDICTED: ruBisCO large subunit-binding protein subunit beta, chloroplastic [Vitis vinifera]	gi|225435794	64590.5	0.215	DLINVLEDAIR	55	44.3	12.3		635.855	1269.7	1270.7	2	0.002558	2.013	294	304	11
2629	178	PREDICTED: ruBisCO large subunit-binding protein subunit beta, chloroplastic [Vitis vinifera]	gi|225435794	64590.5	0.215	DTTTIVGDGSTQEAVNKR	52.8	45.3	7.91		631.317	1890.93	1891.94	3	0.001142	0.6036	390	407	11
2629	178	PREDICTED: ruBisCO large subunit-binding protein subunit beta, chloroplastic [Vitis vinifera]	gi|225435794	64590.5	0.215	EVELEDPVENIGAK	30.4	45.1	10		771.391	1540.77	1541.77	2	0.004798	3.112	122	135	11
2629	178	PREDICTED: ruBisCO large subunit-binding protein subunit beta, chloroplastic [Vitis vinifera]	gi|225435794	64590.5	0.215	IVNDGVTVAK	45.5	44.6	9.21		508.293	1014.57	1015.58	2	-0.0006019	-0.5927	112	121	11
2629	178	PREDICTED: ruBisCO large subunit-binding protein subunit beta, chloroplastic [Vitis vinifera]	gi|225435794	64590.5	0.215	LADLVGVTLGPK	74.1	39.8	10.7		591.857	1181.7	1182.71	2	-0.002882	-2.437	86	97	11
2629	178	PREDICTED: ruBisCO large subunit-binding protein subunit beta, chloroplastic [Vitis vinifera]	gi|225435794	64590.5	0.215	LLLVDKK	35.9	35.1	4.83		414.78	827.545	828.556	2	-0.003682	-4.444	282	288	11
2629	178	PREDICTED: ruBisCO large subunit-binding protein subunit beta, chloroplastic [Vitis vinifera]	gi|225435794	64590.5	0.215	VDAIKDTLDNDEEK	28	43.7	9.2		535.593	1603.76	1604.77	3	-0.001948	-1.214	488	501	11
2629	178	PREDICTED: ruBisCO large subunit-binding protein subunit beta, chloroplastic [Vitis vinifera]	gi|225435794	64590.5	0.215	VEDALNATK	57.8	46.2	8.13		480.751	959.488	960.5	2	-0.004622	-4.812	458	466	11
2629	178	PREDICTED: ruBisCO large subunit-binding protein subunit beta, chloroplastic [Vitis vinifera]	gi|225435794	64590.5	0.215	VVAAGANPVLITR	98	38.3	13.5		640.888	1279.76	1280.77	2	-0.0003619	-0.2826	169	181	11
2629	178	PREDICTED: ruBisCO large subunit-binding protein subunit beta, chloroplastic [Vitis vinifera]	gi|225435794	64590.5	0.215	YGFNAATGK	50.5	41.4	7.6		464.729	927.444	928.452	2	-0.001062	-1.144	541	549	11
2629	178	PREDICTED: protein disulfide-isomerase [Vitis vinifera]	gi|225459587	55654.6	0.515	AAQQEGSKDEL	38.2	41.9	8.71		588.278	1174.54	1175.55	2	-0.005722	-4.867	489	499	22
2629	178	PREDICTED: protein disulfide-isomerase [Vitis vinifera]	gi|225459587	55654.6	0.515	AASILSSHDPPIILAK	37.6	41.3	9.33		816.971	1631.93	1632.93	2	0.001778	1.089	77	92	22
2629	178	PREDICTED: protein disulfide-isomerase [Vitis vinifera]	gi|225459587	55654.6	0.515	AMLFLDHSSELFDAFK	77.8	44.5	0		624.304	1869.89	1870.9	3	-0.007728	-4.131	275	290	22
2629	178	PREDICTED: protein disulfide-isomerase [Vitis vinifera]	gi|225459587	55654.6	0.515	DPSNHPFVIK	25.6	44.2	8.46		577.303	1152.59	1153.6	2	-0.001642	-1.423	257	266	22
2629	178	PREDICTED: protein disulfide-isomerase [Vitis vinifera]	gi|225459587	55654.6	0.515	EADGIVEYLK	45	46.1	6.02		568.798	1135.58	1136.58	2	0.005658	4.978	133	142	22
2629	178	PREDICTED: protein disulfide-isomerase [Vitis vinifera]	gi|225459587	55654.6	0.515	FFNGPNAK	25.3	44.6	3.93		447.728	893.441	894.447	2	0.001038	1.161	267	274	22
2629	178	PREDICTED: protein disulfide-isomerase [Vitis vinifera]	gi|225459587	55654.6	0.515	FVEESSVPIVTLFNK	7.01	43.7	5.64		854.967	1707.92	1708.92	2	0.01142	6.681	242	256	22
2629	178	PREDICTED: protein disulfide-isomerase [Vitis vinifera]	gi|225459587	55654.6	0.515	GESSVTGPLVR	49.4	45.4	8.86		551.299	1100.58	1101.59	2	0.001778	1.614	209	219	22
2629	178	PREDICTED: protein disulfide-isomerase [Vitis vinifera]	gi|225459587	55654.6	0.515	GFPTLK	29.5	42.6	-0.124		331.696	661.377	662.387	2	-0.002862	-4.321	111	116	22
2629	178	PREDICTED: protein disulfide-isomerase [Vitis vinifera]	gi|225459587	55654.6	0.515	IAPEYEK	31.1	44.2	3.1		425.222	848.429	849.435	2	0.001078	1.269	70	76	22
2629	178	PREDICTED: protein disulfide-isomerase [Vitis vinifera]	gi|225459587	55654.6	0.515	IVIVGVFPK	59.8	35.8	7.12		486.321	970.628	971.629	2	0.006138	6.317	167	175	22
2629	178	PREDICTED: protein disulfide-isomerase [Vitis vinifera]	gi|225459587	55654.6	0.515	KSEPIPEVNNEPVK	21.1	45	5.01		527.281	1578.82	1579.83	3	-0.003938	-2.493	369	382	22
2629	178	PREDICTED: protein disulfide-isomerase [Vitis vinifera]	gi|225459587	55654.6	0.515	LDATANDIPNDTFDVK	60.4	43.6	8.79		874.917	1747.82	1748.83	2	-0.006642	-3.798	437	452	22
2629	178	PREDICTED: protein disulfide-isomerase [Vitis vinifera]	gi|225459587	55654.6	0.515	QSGPASAEIK	65.7	43.6	8.08		494.259	986.503	987.511	2	-0.0002819	-0.2855	144	153	22
2629	178	PREDICTED: protein disulfide-isomerase [Vitis vinifera]	gi|225459587	55654.6	0.515	SAEDASSLIVDNK	91.4	44.6	11.8		674.834	1347.65	1348.66	2	0.001538	1.14	154	166	22
2629	178	PREDICTED: protein disulfide-isomerase [Vitis vinifera]	gi|225459587	55654.6	0.515	SASGNISQYEGDR	69	41.6	12.7		692.311	1382.61	1383.61	2	0.001598	1.155	461	473	22
2629	178	PREDICTED: protein disulfide-isomerase [Vitis vinifera]	gi|225459587	55654.6	0.515	SDYDFVHTSDAK	66	38.8	11.3		692.803	1383.59	1384.6	2	-0.002842	-2.053	193	204	22
2629	178	PREDICTED: protein disulfide-isomerase [Vitis vinifera]	gi|225459587	55654.6	0.515	SEPIPEVNNEPVK	72.4	45.4	12.1		726.372	1450.73	1451.74	2	-0.0001419	-0.09777	370	382	22
2629	178	PREDICTED: protein disulfide-isomerase [Vitis vinifera]	gi|225459587	55654.6	0.515	SIEEYKGPR	45.4	45.5	3.55		360.19	1077.55	1078.55	3	0.003022	2.802	124	132	22
2629	178	PREDICTED: protein disulfide-isomerase [Vitis vinifera]	gi|225459587	55654.6	0.515	VDANDDANKELASEFEIR	91.1	43.5	12.4		679.322	2034.95	2035.96	3	-0.003928	-1.929	93	110	22
2629	178	PREDICTED: protein disulfide-isomerase [Vitis vinifera]	gi|225459587	55654.6	0.515	VVVADTLQEIVFNSGK	51.4	44	11.5		573.652	1717.93	1718.93	3	0.009842	5.726	383	398	22
2629	178	PREDICTED: protein disulfide-isomerase [Vitis vinifera]	gi|225459587	55654.6	0.515	YHEVAEQYK	42.4	43.4	11.5		583.779	1165.54	1166.55	2	0.003478	2.981	293	301	22
2629	178	PREDICTED: clathrin light chain 1-like [Vitis vinifera]	gi|359496589	41465.6	0.0667	DATPTTGEAPTTPAAK	75.2	44.3	10.7		764.88	1527.75	1528.75	2	0.004018	2.628	327	342	2
2629	178	PREDICTED: clathrin light chain 1-like [Vitis vinifera]	gi|359496589	41465.6	0.0667	QNAIQLEEK	57.3	43.6	9.05		536.784	1071.55	1072.56	2	-0.003122	-2.911	156	164	2
6426	179	RecName: Full=S-adenosylmethionine synthase 5; Short=AdoMet synthase 5; AltName: Full=Methionine adenosyltransferase 5; Short=MAT 5	gi|223635289	42774.7	0.777	ADIDYEK	35.1	41.4	5.59		427.201	852.388	853.394	2	0.0007981	0.9352	61	67	5
6426	179	RecName: Full=S-adenosylmethionine synthase 5; Short=AdoMet synthase 5; AltName: Full=Methionine adenosyltransferase 5; Short=MAT 5	gi|223635289	42774.7	0.777	DDPDFTWEVVKPLK	77.3	45.4	11.4		563.625	1687.85	1688.85	3	0.008032	4.756	374	387	5
6426	179	RecName: Full=S-adenosylmethionine synthase 5; Short=AdoMet synthase 5; AltName: Full=Methionine adenosyltransferase 5; Short=MAT 5	gi|223635289	42774.7	0.777	EHVIKPVIPEK	37.7	41.4	8.27		430.257	1287.75	1288.76	3	-0.006128	-4.755	212	222	5
6426	179	RecName: Full=S-adenosylmethionine synthase 5; Short=AdoMet synthase 5; AltName: Full=Methionine adenosyltransferase 5; Short=MAT 5	gi|223635289	42774.7	0.777	IIIDTYGGWGAHGGGAFSGK	78.5	45.3	14.1		982.486	1962.96	1963.97	2	-0.001302	-0.6629	254	273	5
6426	179	RecName: Full=S-adenosylmethionine synthase 5; Short=AdoMet synthase 5; AltName: Full=Methionine adenosyltransferase 5; Short=MAT 5	gi|223635289	42774.7	0.777	IPDKEILK	32	38.8	5.25		478.296	954.576	955.582	2	0.001138	1.191	328	335	5
6426	179	RecName: Full=S-adenosylmethionine synthase 5; Short=AdoMet synthase 5; AltName: Full=Methionine adenosyltransferase 5; Short=MAT 5	gi|223635289	42774.7	0.777	LcDQISDAVLDAcLAQDPDSK	116	43.2	12.7	c2: Carbamidomethyl (+57.02), c13: Carbamidomethyl (+57.02)	1167.54	2333.07	2334.06	2	0.01333	5.71	19	39	5
6426	179	RecName: Full=S-adenosylmethionine synthase 5; Short=AdoMet synthase 5; AltName: Full=Methionine adenosyltransferase 5; Short=MAT 5	gi|223635289	42774.7	0.777	METFLFTSESVNEGHPDK	52.7	42.3	0		689.988	2066.94	2067.93	3	0.01527	7.385	1	18	5
6426	179	RecName: Full=S-adenosylmethionine synthase 5; Short=AdoMet synthase 5; AltName: Full=Methionine adenosyltransferase 5; Short=MAT 5	gi|223635289	42774.7	0.777	NGTcSWLRPDGK	35.2	42.5	3.93	c4: Carbamidomethyl (+57.02)	464.222	1389.64	1390.65	3	-0.001183	-0.8509	158	169	5
6426	179	RecName: Full=S-adenosylmethionine synthase 5; Short=AdoMet synthase 5; AltName: Full=Methionine adenosyltransferase 5; Short=MAT 5	gi|223635289	42774.7	0.777	RPEEIGAGDQGHmFGYATDETPELMPLSHVLATK	101	43.8	0	m13: Oxidation (+15.99)	743.56	3712.76	3713.76	5	0.01174	3.16	114	147	5
6426	179	RecName: Full=S-adenosylmethionine synthase 5; Short=AdoMet synthase 5; AltName: Full=Methionine adenosyltransferase 5; Short=MAT 5	gi|223635289	42774.7	0.777	SGAYIVR	56.1	43.9	2.16		383.218	764.421	765.425	2	0.002858	3.734	281	287	5
6426	179	RecName: Full=S-adenosylmethionine synthase 5; Short=AdoMet synthase 5; AltName: Full=Methionine adenosyltransferase 5; Short=MAT 5	gi|223635289	42774.7	0.777	SIVANGLAR	44.7	44.1	5.68		450.768	899.521	900.526	2	0.002118	2.352	292	300	5
6426	179	RecName: Full=S-adenosylmethionine synthase 5; Short=AdoMet synthase 5; AltName: Full=Methionine adenosyltransferase 5; Short=MAT 5	gi|223635289	42774.7	0.777	TAAYGHFGR	61.5	44.4	9.98		490.244	978.473	979.474	2	0.005538	5.654	365	373	5
6426	179	RecName: Full=S-adenosylmethionine synthase 5; Short=AdoMet synthase 5; AltName: Full=Methionine adenosyltransferase 5; Short=MAT 5	gi|223635289	42774.7	0.777	TIFHLNPSGR	58	43.2	9.31		571.31	1140.61	1141.61	2	0.001738	1.522	228	237	5
6426	179	RecName: Full=S-adenosylmethionine synthase 5; Short=AdoMet synthase 5; AltName: Full=Methionine adenosyltransferase 5; Short=MAT 5	gi|223635289	42774.7	0.777	TNmVmVFGEITTK	42.6	43.8	11.4	m3: Oxidation (+15.99), m5: Oxidation (+15.99)	751.865	1501.72	1502.72	2	0.000248	0.1651	48	60	5
6426	179	RecName: Full=S-adenosylmethionine synthase 5; Short=AdoMet synthase 5; AltName: Full=Methionine adenosyltransferase 5; Short=MAT 5	gi|223635289	42774.7	0.777	TQVTVEYHNENGAMVPLR	118	44.9	0		686.677	2057.01	2058.01	3	0.007872	3.825	170	187	5
6426	179	RecName: Full=S-adenosylmethionine synthase 5; Short=AdoMet synthase 5; AltName: Full=Methionine adenosyltransferase 5; Short=MAT 5	gi|223635289	42774.7	0.777	VAcETcTK	40.5	38.8	2.79	c3: Carbamidomethyl (+57.02), c6: Carbamidomethyl (+57.02)	484.712	967.41	968.418	2	-0.0006125	-0.6325	40	47	5
6426	179	RecName: Full=S-adenosylmethionine synthase 5; Short=AdoMet synthase 5; AltName: Full=Methionine adenosyltransferase 5; Short=MAT 5	gi|223635289	42774.7	0.777	VHTVLISTQHDETVTNDEIAADLK	81.2	45.1	13.2		883.788	2648.34	2649.34	3	0.01325	5.002	188	211	5
6426	179	RecName: Full=S-adenosylmethionine synthase 5; Short=AdoMet synthase 5; AltName: Full=Methionine adenosyltransferase 5; Short=MAT 5	gi|223635289	42774.7	0.777	VLVNIEQQSPDIAQGVHGHLTK	108	43.7	16.1		1192.14	2382.26	2383.27	2	-0.002902	-1.218	92	113	5
6426	179	RecName: Full=S-adenosylmethionine synthase 5; Short=AdoMet synthase 5; AltName: Full=Methionine adenosyltransferase 5; Short=MAT 5	gi|223635289	42774.7	0.777	YLDEK	28.8	39.8	0		334.17	666.325	667.33	2	0.002138	3.204	223	227	5
6426	179	PREDICTED: ruBisCO large subunit-binding protein subunit alpha, chloroplastic-like [Vitis vinifera]	gi|359479362	61967	0.177	AIELADAMENAGAALIR	92.4	45	0		864.95	1727.89	1728.89	2	-0.002482	-1.436	103	119	5
6426	179	PREDICTED: ruBisCO large subunit-binding protein subunit alpha, chloroplastic-like [Vitis vinifera]	gi|359479362	61967	0.177	ALVAPASLIAHNAGVEGEVVVEK	32.8	42.6	10.4		758.421	2272.24	2273.25	3	-0.002768	-1.218	492	514	5
6426	179	PREDICTED: ruBisCO large subunit-binding protein subunit alpha, chloroplastic-like [Vitis vinifera]	gi|359479362	61967	0.177	NATFAAIEEGIVPGGGAAFVHLSTYVPAIK	18	43	9.69		1000.87	2999.59	3000.58	3	0.009992	3.33	445	474	5
6426	179	PREDICTED: ruBisCO large subunit-binding protein subunit alpha, chloroplastic-like [Vitis vinifera]	gi|359479362	61967	0.177	SPLLIVAEDVTGEALATLVVNK	82.2	39.3	12.3		1126.64	2251.27	2252.28	2	0.002298	1.02	289	310	5
6426	179	PREDICTED: ruBisCO large subunit-binding protein subunit alpha, chloroplastic-like [Vitis vinifera]	gi|359479362	61967	0.177	VGAATETELEDR	89.5	43.6	11.8		645.811	1289.61	1290.62	2	-0.001782	-1.381	425	436	5
6426	179	hypothetical protein VITISV_021576 [Vitis vinifera]	gi|147795191,gi|147858738,gi|225451685,gi|225457604,gi|225457606	48077.8	0.064	AAALNIVPTSTGAAK	4.7	44.1	4.97		692.889	1383.76	1384.78	2	-0.008202	-5.923	288	302	2
6426	179	hypothetical protein VITISV_021576 [Vitis vinifera]	gi|147795191,gi|147858738,gi|225451685,gi|225457604,gi|225457606	48077.8	0.064	GTmTTTHSYTGDQR	58.7	38.8	9.72	m3: Oxidation (+15.99)	524.565	1570.67	1571.68	3	0.004487	2.855	261	274	2
6426	179	PREDICTED: uncharacterized protein LOC100247396 [Vitis vinifera]	gi|225438579	39363.6	0.042	APFINR	36.5	47.2	-0.688		359.203	716.392	717.404	2	-0.004742	-6.61	319	324	2
6426	179	PREDICTED: uncharacterized protein LOC100247396 [Vitis vinifera]	gi|225438579	39363.6	0.042	IGINSVQR	38.1	44.3	2.61		443.758	885.501	886.51	2	-0.001902	-2.145	128	135	2
6426	179	PREDICTED: bifunctional aspartate aminotransferase and glutamate/aspartate-prephenate aminotransferase [Vitis vinifera]	gi|225438653,gi|296082448	44214.9	0.141	HFVAAcGK	44.8	43.8	10.5	c6: Carbamidomethyl (+57.02)	445.22	888.426	889.435	2	-0.002127	-2.392	258	265	5
6426	179	PREDICTED: bifunctional aspartate aminotransferase and glutamate/aspartate-prephenate aminotransferase [Vitis vinifera]	gi|225438653,gi|296082448	44214.9	0.141	IQSQFTSGASSISQK	88.6	44.9	11.1		784.899	1567.78	1568.79	2	-0.0004419	-0.2817	266	280	5
6426	179	PREDICTED: bifunctional aspartate aminotransferase and glutamate/aspartate-prephenate aminotransferase [Vitis vinifera]	gi|225438653,gi|296082448	44214.9	0.141	ISYAASLSTLHAAVER	77.7	45.1	10.3		563.639	1687.89	1688.9	3	0.005272	3.122	381	396	5
6426	179	PREDICTED: bifunctional aspartate aminotransferase and glutamate/aspartate-prephenate aminotransferase [Vitis vinifera]	gi|225438653,gi|296082448	44214.9	0.141	LGYLAGPK	52.5	45.2	5.61		409.74	817.466	818.477	2	-0.004082	-4.987	250	257	5
6426	179	PREDICTED: bifunctional aspartate aminotransferase and glutamate/aspartate-prephenate aminotransferase [Vitis vinifera]	gi|225438653,gi|296082448	44214.9	0.141	YTPNAGTLEVR	52.4	45.7	8.35		610.817	1219.62	1220.63	2	0.0001381	0.1131	67	77	5
6426	179	RecName: Full=S-adenosylmethionine synthase 2; Short=AdoMet synthase 2; AltName: Full=Methionine adenosyltransferase 2; Short=MAT 2	gi|223635284	43095.8	0.83	ANVDYEK	37.3	42.4	3.93		419.702	837.388	838.394	2	0.001498	1.787	61	67	22
6426	179	RecName: Full=S-adenosylmethionine synthase 2; Short=AdoMet synthase 2; AltName: Full=Methionine adenosyltransferase 2; Short=MAT 2	gi|223635284	43095.8	0.83	cIVQVSYAIGVPEPLSVFVDTYGTGK	97.9	45.3	0	c1: Carbamidomethyl (+57.02)	1400.21	2798.4	2799.43	2	-0.02409	-8.604	302	327	22
6426	179	RecName: Full=S-adenosylmethionine synthase 2; Short=AdoMet synthase 2; AltName: Full=Methionine adenosyltransferase 2; Short=MAT 2	gi|223635284	43095.8	0.83	DDPDFTWEVVKPLK	77.3	45.4	11.4		563.625	1687.85	1688.85	3	0.008032	4.756	374	387	22
6426	179	RecName: Full=S-adenosylmethionine synthase 2; Short=AdoMet synthase 2; AltName: Full=Methionine adenosyltransferase 2; Short=MAT 2	gi|223635284	43095.8	0.83	EHVIKPVIPEK	37.7	41.4	8.27		430.257	1287.75	1288.76	3	-0.006128	-4.755	212	222	22
6426	179	RecName: Full=S-adenosylmethionine synthase 2; Short=AdoMet synthase 2; AltName: Full=Methionine adenosyltransferase 2; Short=MAT 2	gi|223635284	43095.8	0.83	EIGFVSDDVGLDADNcK	120	40.6	15	c16: Carbamidomethyl (+57.02)	927.416	1852.82	1853.82	2	0.002173	1.172	75	91	22
6426	179	RecName: Full=S-adenosylmethionine synthase 2; Short=AdoMet synthase 2; AltName: Full=Methionine adenosyltransferase 2; Short=MAT 2	gi|223635284	43095.8	0.83	ENFDFRPGmISINLDLK	59.6	45.4	13.1	m9: Oxidation (+15.99)	675.675	2024	2025.01	3	-0.002073	-1.024	339	355	22
6426	179	RecName: Full=S-adenosylmethionine synthase 2; Short=AdoMet synthase 2; AltName: Full=Methionine adenosyltransferase 2; Short=MAT 2	gi|223635284	43095.8	0.83	IIIDTYGGWGAHGGGAFSGK	78.5	45.3	14.1		982.486	1962.96	1963.97	2	-0.001302	-0.6629	254	273	22
6426	179	RecName: Full=S-adenosylmethionine synthase 2; Short=AdoMet synthase 2; AltName: Full=Methionine adenosyltransferase 2; Short=MAT 2	gi|223635284	43095.8	0.83	IPDREILK	25.9	39	5.4		492.298	982.58	983.589	2	-0.0009619	-0.978	328	335	22
6426	179	RecName: Full=S-adenosylmethionine synthase 2; Short=AdoMet synthase 2; AltName: Full=Methionine adenosyltransferase 2; Short=MAT 2	gi|223635284	43095.8	0.83	LcDQISDAVLDAcLQQDPDSK	89.4	41.5	12.4	c2: Carbamidomethyl (+57.02), c13: Carbamidomethyl (+57.02)	1196.04	2390.07	2391.08	2	-0.004413	-1.845	19	39	22
6426	179	RecName: Full=S-adenosylmethionine synthase 2; Short=AdoMet synthase 2; AltName: Full=Methionine adenosyltransferase 2; Short=MAT 2	gi|223635284	43095.8	0.83	METFLFTSESVNEGHPDK	52.7	42.3	0		689.988	2066.94	2067.93	3	0.01527	7.385	1	18	22
6426	179	RecName: Full=S-adenosylmethionine synthase 2; Short=AdoMet synthase 2; AltName: Full=Methionine adenosyltransferase 2; Short=MAT 2	gi|223635284	43095.8	0.83	NGTcPWLRPDGK	38.5	43.3	5.92	c4: Carbamidomethyl (+57.02)	467.564	1399.67	1400.67	3	0.002517	1.797	158	169	22
6426	179	RecName: Full=S-adenosylmethionine synthase 2; Short=AdoMet synthase 2; AltName: Full=Methionine adenosyltransferase 2; Short=MAT 2	gi|223635284	43095.8	0.83	RPEEIGAGDQGHmFGYATDETPELMPLSHVLATK	101	43.8	0	m13: Oxidation (+15.99)	743.56	3712.76	3713.76	5	0.01174	3.16	114	147	22
6426	179	RecName: Full=S-adenosylmethionine synthase 2; Short=AdoMet synthase 2; AltName: Full=Methionine adenosyltransferase 2; Short=MAT 2	gi|223635284	43095.8	0.83	SGAYIVR	56.1	43.9	2.16		383.218	764.421	765.425	2	0.002858	3.734	281	287	22
6426	179	RecName: Full=S-adenosylmethionine synthase 2; Short=AdoMet synthase 2; AltName: Full=Methionine adenosyltransferase 2; Short=MAT 2	gi|223635284	43095.8	0.83	SIVANGLAR	44.7	44.1	5.68		450.768	899.521	900.526	2	0.002118	2.352	292	300	22
6426	179	RecName: Full=S-adenosylmethionine synthase 2; Short=AdoMet synthase 2; AltName: Full=Methionine adenosyltransferase 2; Short=MAT 2	gi|223635284	43095.8	0.83	TAAYGHFGR	61.5	44.4	9.98		490.244	978.473	979.474	2	0.005538	5.654	365	373	22
6426	179	RecName: Full=S-adenosylmethionine synthase 2; Short=AdoMet synthase 2; AltName: Full=Methionine adenosyltransferase 2; Short=MAT 2	gi|223635284	43095.8	0.83	TIFHLNPSGR	58	43.2	9.31		571.31	1140.61	1141.61	2	0.001738	1.522	228	237	22
6426	179	RecName: Full=S-adenosylmethionine synthase 2; Short=AdoMet synthase 2; AltName: Full=Methionine adenosyltransferase 2; Short=MAT 2	gi|223635284	43095.8	0.83	TNmVmVFGEITTK	42.6	43.8	11.4	m3: Oxidation (+15.99), m5: Oxidation (+15.99)	751.865	1501.72	1502.72	2	0.000248	0.1651	48	60	22
6426	179	RecName: Full=S-adenosylmethionine synthase 2; Short=AdoMet synthase 2; AltName: Full=Methionine adenosyltransferase 2; Short=MAT 2	gi|223635284	43095.8	0.83	TQVTVEYHNDGGAR	99.2	42.4	12.3		516.244	1545.71	1546.72	3	-0.007098	-4.589	170	183	22
6426	179	RecName: Full=S-adenosylmethionine synthase 2; Short=AdoMet synthase 2; AltName: Full=Methionine adenosyltransferase 2; Short=MAT 2	gi|223635284	43095.8	0.83	VAcETcTK	40.5	38.8	2.79	c3: Carbamidomethyl (+57.02), c6: Carbamidomethyl (+57.02)	484.712	967.41	968.418	2	-0.0006125	-0.6325	40	47	22
6426	179	RecName: Full=S-adenosylmethionine synthase 2; Short=AdoMet synthase 2; AltName: Full=Methionine adenosyltransferase 2; Short=MAT 2	gi|223635284	43095.8	0.83	VHTVLISTQHDETVTNDEIAADLK	81.2	45.1	13.2		883.788	2648.34	2649.34	3	0.01325	5.002	188	211	22
6426	179	RecName: Full=S-adenosylmethionine synthase 2; Short=AdoMet synthase 2; AltName: Full=Methionine adenosyltransferase 2; Short=MAT 2	gi|223635284	43095.8	0.83	VLVNIEQQSPDIAQGVHGHLTK	108	43.7	16.1		1192.14	2382.26	2383.27	2	-0.002902	-1.218	92	113	22
6426	179	RecName: Full=S-adenosylmethionine synthase 2; Short=AdoMet synthase 2; AltName: Full=Methionine adenosyltransferase 2; Short=MAT 2	gi|223635284	43095.8	0.83	YLDEK	28.8	39.8	0		334.17	666.325	667.33	2	0.002138	3.204	223	227	22
6426	179	PREDICTED: isocitrate dehydrogenase [NADP] [Vitis vinifera]	gi|225466253	46267.5	0.5	cATITPDEGR	50	40.4	9.53	c1: Carbamidomethyl (+57.02)	560.258	1118.5	1119.51	2	-0.002027	-1.811	75	84	20
6426	179	PREDICTED: isocitrate dehydrogenase [NADP] [Vitis vinifera]	gi|225466253	46267.5	0.5	DATDDKVTVESAEATLK	55.7	45.3	10.5		598.301	1791.88	1792.88	3	0.007912	4.413	52	68	20
6426	179	PREDICTED: isocitrate dehydrogenase [NADP] [Vitis vinifera]	gi|225466253	46267.5	0.5	DLALLIHGSK	42.9	39.9	11.1		533.817	1065.62	1066.63	2	0.001958	1.836	377	386	20
6426	179	PREDICTED: isocitrate dehydrogenase [NADP] [Vitis vinifera]	gi|225466253	46267.5	0.5	EPIIcK	33	45	-0.419	c5: Carbamidomethyl (+57.02)	380.209	758.403	759.407	2	0.002973	3.915	112	117	20
6426	179	PREDICTED: isocitrate dehydrogenase [NADP] [Vitis vinifera]	gi|225466253	46267.5	0.5	FKDIFQEVYETQWK	35.2	45.3	11.1		620.98	1859.92	1860.92	3	0.007222	3.881	225	238	20
6426	179	PREDICTED: isocitrate dehydrogenase [NADP] [Vitis vinifera]	gi|225466253	46267.5	0.5	GGETSTNSIASIFAWSR	107	44.7	11.9		892.437	1782.86	1783.86	2	0.005078	2.847	324	340	20
6426	179	PREDICTED: isocitrate dehydrogenase [NADP] [Vitis vinifera]	gi|225466253	46267.5	0.5	HAFGDQYR	26.6	41.1	6.54		497.227	992.439	993.454	2	-0.007402	-7.451	135	142	20
6426	179	PREDICTED: isocitrate dehydrogenase [NADP] [Vitis vinifera]	gi|225466253	46267.5	0.5	LEAAcVGTVESGK	85.4	44.9	13.8	c5: Carbamidomethyl (+57.02)	660.826	1319.64	1320.65	2	-0.001967	-1.49	361	373	20
6426	179	PREDICTED: isocitrate dehydrogenase [NADP] [Vitis vinifera]	gi|225466253	46267.5	0.5	LIDDMVAYALK	58.5	44.1	0		626.339	1250.66	1251.67	2	0.005318	4.249	252	262	20
6426	179	PREDICTED: isocitrate dehydrogenase [NADP] [Vitis vinifera]	gi|225466253	46267.5	0.5	LLDFTEK	39.6	43.8	3.64		433.24	864.466	865.467	2	0.006698	7.739	354	360	20
6426	179	PREDICTED: isocitrate dehydrogenase [NADP] [Vitis vinifera]	gi|225466253	46267.5	0.5	LVFVPEGK	49.5	45.8	6.41		444.764	887.513	888.519	2	0.0007981	0.8982	156	163	20
6426	179	PREDICTED: isocitrate dehydrogenase [NADP] [Vitis vinifera]	gi|225466253	46267.5	0.5	LVPSWTKPIcIGR	42	42.4	5.67	c10: Carbamidomethyl (+57.02)	763.933	1525.85	1526.85	2	0.008233	5.392	122	134	20
6426	179	PREDICTED: isocitrate dehydrogenase [NADP] [Vitis vinifera]	gi|225466253	46267.5	0.5	mKEFDLK	37.7	42.6	8.27	m1: Oxidation (+15.99)	463.737	925.459	926.465	2	0.000823	0.8884	85	91	20
6426	179	PREDICTED: isocitrate dehydrogenase [NADP] [Vitis vinifera]	gi|225466253	46267.5	0.5	NILNGTVFR	28.9	44.5	4		517.295	1032.58	1033.58	2	0.004738	4.584	103	111	20
6426	179	PREDICTED: isocitrate dehydrogenase [NADP] [Vitis vinifera]	gi|225466253	46267.5	0.5	QWPLYLSTK	29.8	44.7	5.87		568.312	1134.61	1135.61	2	0.002878	2.534	206	214	20
6426	179	PREDICTED: isocitrate dehydrogenase [NADP] [Vitis vinifera]	gi|225466253	46267.5	0.5	SEGGYVWAcK	66.7	38.7	10.5	c9: Carbamidomethyl (+57.02)	578.757	1155.5	1156.51	2	-0.002247	-1.943	263	272	20
6426	179	PREDICTED: isocitrate dehydrogenase [NADP] [Vitis vinifera]	gi|225466253	46267.5	0.5	TIEAEAAHGTVTR	73	44.4	11.8		678.35	1354.69	1355.69	2	0.001458	1.076	304	316	20
6426	179	PREDICTED: isocitrate dehydrogenase [NADP] [Vitis vinifera]	gi|225466253	46267.5	0.5	VANPIVEMDGDEMTR	63.1	41.9	0		838.887	1675.76	1676.76	2	0.005098	3.04	8	22	20
6426	179	PREDICTED: isocitrate dehydrogenase [NADP] [Vitis vinifera]	gi|225466253	46267.5	0.5	VTVESAEATLK	69.7	46	10.2		574.314	1146.61	1147.62	2	0.001118	0.9742	58	68	20
6426	179	PREDICTED: isocitrate dehydrogenase [NADP] [Vitis vinifera]	gi|225466253	46267.5	0.5	YFDLGLPHR	51	46	4.85		373.2	1116.58	1117.58	3	0.005892	5.272	43	51	20
6426	179	anthocyanidin synthase [Vitis vinifera]	gi|157838576,gi|1730109,gi|22266677,gi|225426722,gi|297742628	40146.2	0.0873	DIESEDEVVR	47.2	41.2	9.21		595.78	1189.55	1190.55	2	-0.0009019	-0.7576	56	65	3
6426	179	anthocyanidin synthase [Vitis vinifera]	gi|157838576,gi|1730109,gi|22266677,gi|225426722,gi|297742628	40146.2	0.0873	IAGYGSK	54.1	41.2	2.29		348.19	694.364	695.372	2	-0.0006419	-0.9232	124	130	3
6426	179	anthocyanidin synthase [Vitis vinifera]	gi|157838576,gi|1730109,gi|22266677,gi|225426722,gi|297742628	40146.2	0.0873	VESLSSSGIQSIPK	63.3	45.3	10		716.39	1430.77	1431.77	2	0.004418	3.086	9	22	3
6426	179	hypothetical protein VITISV_027725 [Vitis vinifera]	gi|147832996,gi|225446410	45336	0.0301	VPLVIQLTDDEK	64.9	43.6	12.4		685.381	1368.75	1369.76	2	-0.002542	-1.856	119	130	1
6426	179	PREDICTED: mannose-1-phosphate guanyltransferase alpha-like isoform 1 [Vitis vinifera]	gi|225452650,gi|359488770	45779	0.0867	LDQDILSPLAGK	51.3	42.9	10.6		635.356	1268.7	1269.71	2	-0.001362	-1.073	235	246	3
6426	179	PREDICTED: mannose-1-phosphate guanyltransferase alpha-like isoform 1 [Vitis vinifera]	gi|225452650,gi|359488770	45779	0.0867	VQAEGDYNAK	59.5	42.5	10.1		547.758	1093.5	1094.51	2	-0.002542	-2.322	367	376	3
6426	179	PREDICTED: mannose-1-phosphate guanyltransferase alpha-like isoform 1 [Vitis vinifera]	gi|225452650,gi|359488770	45779	0.0867	YTSPHLLASGDGTK	62.4	44.8	10.9		482.91	1445.71	1446.72	3	-0.007278	-5.031	280	293	3
6426	179	PREDICTED: alcohol dehydrogenase 1 [Vitis vinifera]	gi|225431505,gi|7264740,gi|9885274	41103.8	0.184	AFEYMLSGDGLR	62.2	42.6	0		679.826	1357.64	1358.64	2	0.002938	2.162	362	373	6
6426	179	PREDICTED: alcohol dehydrogenase 1 [Vitis vinifera]	gi|225431505,gi|7264740,gi|9885274	41103.8	0.184	FGVTEFLNPK	59	44.5	11.7		576.306	1150.6	1151.61	2	-0.004582	-3.979	239	248	6
6426	179	PREDICTED: alcohol dehydrogenase 1 [Vitis vinifera]	gi|225431505,gi|7264740,gi|9885274	41103.8	0.184	FITHEVPFAEINK	37.9	45.4	8.96		515.61	1543.81	1544.81	3	0.005472	3.542	349	361	6
6426	179	PREDICTED: alcohol dehydrogenase 1 [Vitis vinifera]	gi|225431505,gi|7264740,gi|9885274	41103.8	0.184	GVMLSDNK	54	43.9	0		432.219	862.424	863.429	2	0.002358	2.731	124	131	6
6426	179	PREDICTED: alcohol dehydrogenase 1 [Vitis vinifera]	gi|225431505,gi|7264740,gi|9885274	41103.8	0.184	IIGIDLNPK	57.9	38.3	9.32		491.804	981.593	982.593	2	0.007078	7.203	223	231	6
6426	179	PREDICTED: alcohol dehydrogenase 1 [Vitis vinifera]	gi|225431505,gi|7264740,gi|9885274	41103.8	0.184	THPVNLLNER	35.4	45.2	7.02		398.218	1191.63	1192.64	3	-0.002968	-2.489	307	316	6
6426	179	eukaryotic initiation factor 4a-12 [Dekkera bruxellensis AWRI1499]	gi|385302570	44674.3	0.0732	DEITLEGIK	36.9	46.6	6.33		509.274	1016.53	1017.55	2	-0.005262	-5.171	229	237	1
6426	179	eukaryotic initiation factor 4a-12 [Dekkera bruxellensis AWRI1499]	gi|385302570	44674.3	0.0732	GIDVQQVSLVINYDLPIDR	96.7	43.2	14.4		1079.09	2156.17	2157.16	2	0.0178	8.251	325	343	1
6426	179	eukaryotic initiation factor 4a-12 [Dekkera bruxellensis AWRI1499]	gi|385302570	44674.3	0.0732	RDEITLEGIK	49.8	45	5.34		587.327	1172.64	1173.65	2	-0.001242	-1.058	228	237	1
6426	179	hypothetical protein VITISV_037577 [Vitis vinifera]	gi|147785805,gi|225464928	44937	0.422	AVLPIIQGR	44.7	35.9	8.61		483.813	965.611	966.61	2	0.008378	8.667	52	60	16
6426	179	hypothetical protein VITISV_037577 [Vitis vinifera]	gi|147785805,gi|225464928	44937	0.422	DAIMAEFR	43.5	43	0		476.731	951.447	952.456	2	-0.001882	-1.976	301	308	16
6426	179	hypothetical protein VITISV_037577 [Vitis vinifera]	gi|147785805,gi|225464928	44937	0.422	DELTLEGIK	36.9	46.6	6.33		509.274	1016.53	1017.55	2	-0.005262	-5.171	228	236	16
6426	179	hypothetical protein VITISV_037577 [Vitis vinifera]	gi|147785805,gi|225464928	44937	0.422	DVIAQAQSGTGK	72.1	45.8	10.9		587.809	1173.6	1174.61	2	0.003738	3.182	61	72	16
6426	179	hypothetical protein VITISV_037577 [Vitis vinifera]	gi|147785805,gi|225464928	44937	0.422	ELYIHR	36.1	46.5	-0.151		415.73	829.446	830.452	2	0.001558	1.876	346	351	16
6426	179	hypothetical protein VITISV_037577 [Vitis vinifera]	gi|147785805,gi|225464928	44937	0.422	EVQALILSPTR	50.9	41.5	11.3		613.86	1225.71	1226.71	2	0.002278	1.857	90	100	16
6426	179	hypothetical protein VITISV_037577 [Vitis vinifera]	gi|147785805,gi|225464928	44937	0.422	GIYAYGFEKPSAIQQR	105	45	12.7		914.472	1826.93	1827.94	2	-0.002302	-1.259	36	51	16
6426	179	hypothetical protein VITISV_037577 [Vitis vinifera]	gi|147785805,gi|225464928	44937	0.422	KGVAINFVK	64	39.2	11.3		488.306	974.597	975.599	2	0.005938	6.087	361	369	16
6426	179	hypothetical protein VITISV_037577 [Vitis vinifera]	gi|147785805,gi|225464928	44937	0.422	KVDWLTEK	41.7	46.2	7.51		509.779	1017.54	1018.56	2	-0.005402	-5.304	273	280	16
6426	179	hypothetical protein VITISV_037577 [Vitis vinifera]	gi|147785805,gi|225464928	44937	0.422	LLVLDESDEMLSR	60.9	45.8	0		507.262	1518.76	1519.77	3	0.004752	3.127	167	179	16
6426	179	hypothetical protein VITISV_037577 [Vitis vinifera]	gi|147785805,gi|225464928	44937	0.422	QFFVAVER	47	43.8	6.56		498.27	994.525	995.531	2	0.001218	1.224	237	244	16
6426	179	hypothetical protein VITISV_037577 [Vitis vinifera]	gi|147785805,gi|225464928	44937	0.422	RDELTLEGIK	49.8	45	5.34		587.327	1172.64	1173.65	2	-0.001242	-1.058	227	236	16
6426	179	hypothetical protein VITISV_037577 [Vitis vinifera]	gi|147785805,gi|225464928	44937	0.422	SNNFTVSSmHGDMPQK	58.2	38.2	0	m9: Oxidation (+15.99)	599.264	1794.77	1795.77	3	0.002897	1.613	283	298	16
6426	179	hypothetical protein VITISV_037577 [Vitis vinifera]	gi|147785805,gi|225464928	44937	0.422	SVGEDIR	54.8	44.1	1.34		388.202	774.389	775.394	2	0.001998	2.577	129	135	16
6426	179	hypothetical protein VITISV_037577 [Vitis vinifera]	gi|147785805,gi|225464928	44937	0.422	VLITTDVWAR	70.8	44.9	10.8		587.338	1172.66	1173.66	2	0.007058	6.014	314	323	16
6426	179	hypothetical protein VITISV_037577 [Vitis vinifera]	gi|147785805,gi|225464928	44937	0.422	YLPPELQVVLISATLPNEILEITNK	12.2	37.8	8.23		936.532	2806.57	2807.58	3	-0.0001179	-0.04201	191	215	16
6426	179	GDP-mannose-3',5'-epimerase [Vitis vinifera]	gi|146432257,gi|225451338	42545.7	0.37	ALTSTDKFEmWGDGLQTR	78.1	43.5	10.5	m10: Oxidation (+15.99)	691.329	2070.97	2071.98	3	-0.003243	-1.565	225	242	10
6426	179	GDP-mannose-3',5'-epimerase [Vitis vinifera]	gi|146432257,gi|225451338	42545.7	0.37	ESDAWPAEPQDAYGLEK	50.6	41	10.7		953.432	1904.85	1905.85	2	0.005378	2.822	161	177	10
6426	179	GDP-mannose-3',5'-epimerase [Vitis vinifera]	gi|146432257,gi|225451338	42545.7	0.37	FFYASSAcIYPEFK	11	42.7	7.69	c8: Carbamidomethyl (+57.02)	865.403	1728.79	1729.79	2	0.005053	2.921	138	151	10
6426	179	GDP-mannose-3',5'-epimerase [Vitis vinifera]	gi|146432257,gi|225451338	42545.7	0.37	ISITGAGGFIASHIAR	92.1	43.9	12.1		524.293	1569.86	1570.87	3	-0.005578	-3.551	30	45	10
6426	179	GDP-mannose-3',5'-epimerase [Vitis vinifera]	gi|146432257,gi|225451338	42545.7	0.37	ITYFWIK	15.8	42.2	4.84		485.776	969.538	970.54	2	0.005558	5.727	330	336	10
6426	179	GDP-mannose-3',5'-epimerase [Vitis vinifera]	gi|146432257,gi|225451338	42545.7	0.37	LATEELcK	42.2	44	6.92	c7: Carbamidomethyl (+57.02)	482.243	962.472	963.482	2	-0.002207	-2.291	178	185	10
6426	179	GDP-mannose-3',5'-epimerase [Vitis vinifera]	gi|146432257,gi|225451338	42545.7	0.37	NLPIHHIPGPEGVR	37.1	43.5	8.1		512.622	1534.84	1535.84	3	0.005842	3.804	290	303	10
6426	179	GDP-mannose-3',5'-epimerase [Vitis vinifera]	gi|146432257,gi|225451338	42545.7	0.37	NSDNTLIK	56.3	45.6	4.02		452.741	903.468	904.473	2	0.001358	1.501	306	313	10
6426	179	GDP-mannose-3',5'-epimerase [Vitis vinifera]	gi|146432257,gi|225451338	42545.7	0.37	QLETNVSLK	44.4	45.4	3.96		516.293	1030.57	1031.57	2	0.004838	4.69	152	160	10
6426	179	GDP-mannose-3',5'-epimerase [Vitis vinifera]	gi|146432257,gi|225451338	42545.7	0.37	VVGTQAPVQLGSLR	78.2	40.4	12		712.918	1423.82	1424.82	2	0.006258	4.392	357	370	10
6426	179	hypothetical protein VITISV_003948 [Vitis vinifera]	gi|147794688,gi|225432858	42544.3	0.383	AITSTDKFEmWGDGLQTR	78.1	43.5	10.5	m10: Oxidation (+15.99)	691.329	2070.97	2071.98	3	-0.003243	-1.565	225	242	10
6426	179	hypothetical protein VITISV_003948 [Vitis vinifera]	gi|147794688,gi|225432858	42544.3	0.383	ESDAWPAEPQDAYGLEK	50.6	41	10.7		953.432	1904.85	1905.85	2	0.005378	2.822	161	177	10
6426	179	hypothetical protein VITISV_003948 [Vitis vinifera]	gi|147794688,gi|225432858	42544.3	0.383	FFYASSAcIYPEFK	11	42.7	7.69	c8: Carbamidomethyl (+57.02)	865.403	1728.79	1729.79	2	0.005053	2.921	138	151	10
6426	179	hypothetical protein VITISV_003948 [Vitis vinifera]	gi|147794688,gi|225432858	42544.3	0.383	ISITGAGGFIASHIAR	92.1	43.9	12.1		524.293	1569.86	1570.87	3	-0.005578	-3.551	30	45	10
6426	179	hypothetical protein VITISV_003948 [Vitis vinifera]	gi|147794688,gi|225432858	42544.3	0.383	ITYFWIK	15.8	42.2	4.84		485.776	969.538	970.54	2	0.005558	5.727	330	336	10
6426	179	hypothetical protein VITISV_003948 [Vitis vinifera]	gi|147794688,gi|225432858	42544.3	0.383	LATEELcK	42.2	44	6.92	c7: Carbamidomethyl (+57.02)	482.243	962.472	963.482	2	-0.002207	-2.291	178	185	10
6426	179	hypothetical protein VITISV_003948 [Vitis vinifera]	gi|147794688,gi|225432858	42544.3	0.383	NLPIHHIPGPEGVR	37.1	43.5	8.1		512.622	1534.84	1535.84	3	0.005842	3.804	290	303	10
6426	179	hypothetical protein VITISV_003948 [Vitis vinifera]	gi|147794688,gi|225432858	42544.3	0.383	QLETNVSLK	44.4	45.4	3.96		516.293	1030.57	1031.57	2	0.004838	4.69	152	160	10
6426	179	hypothetical protein VITISV_003948 [Vitis vinifera]	gi|147794688,gi|225432858	42544.3	0.383	VQGIDLSVYGSSK	70.6	44.9	11.5		676.858	1351.7	1352.71	2	0.003078	2.275	344	356	10
6426	179	hypothetical protein VITISV_003948 [Vitis vinifera]	gi|147794688,gi|225432858	42544.3	0.383	VVGTQAPVQLGSLR	78.2	40.4	12		712.918	1423.82	1424.82	2	0.006258	4.392	357	370	10
6509	180	PREDICTED: leucine aminopeptidase 2, chloroplastic isoform 1 [Vitis vinifera]	gi|225445867,gi|297743644	60726.3	0.391	AAQASDVAIVLASSEGLSAESK	54	45.5	12		702.029	2103.07	2104.08	3	-0.004398	-2.09	187	208	17
6509	180	PREDICTED: leucine aminopeptidase 2, chloroplastic isoform 1 [Vitis vinifera]	gi|225445867,gi|297743644	60726.3	0.391	ATLGLTHPSNVEPPK	55.4	45.1	9.72		780.925	1559.84	1560.84	2	0.003998	2.561	63	77	17
6509	180	PREDICTED: leucine aminopeptidase 2, chloroplastic isoform 1 [Vitis vinifera]	gi|225445867,gi|297743644	60726.3	0.391	EVLAASEASGEK	68.7	44.8	11.1		595.798	1189.58	1190.59	2	-0.0004419	-0.3712	490	501	17
6509	180	PREDICTED: leucine aminopeptidase 2, chloroplastic isoform 1 [Vitis vinifera]	gi|225445867,gi|297743644	60726.3	0.391	FDmGGSAAVLGAAK	102	44.5	10.8	m3: Oxidation (+15.99)	655.826	1309.64	1310.64	2	0.003203	2.444	376	389	17
6509	180	PREDICTED: leucine aminopeptidase 2, chloroplastic isoform 1 [Vitis vinifera]	gi|225445867,gi|297743644	60726.3	0.391	FENPILK	28.4	46.6	4.93		430.748	859.482	860.488	2	0.002018	2.345	112	118	17
6509	180	PREDICTED: leucine aminopeptidase 2, chloroplastic isoform 1 [Vitis vinifera]	gi|225445867,gi|297743644	60726.3	0.391	GDILAVGVTEK	64.2	44.5	9.1		551.311	1100.61	1101.62	2	-0.001602	-1.454	92	102	17
6509	180	PREDICTED: leucine aminopeptidase 2, chloroplastic isoform 1 [Vitis vinifera]	gi|225445867,gi|297743644	60726.3	0.391	IASAYSDVLSAK	82.5	44.5	10.2		612.83	1223.64	1224.65	2	0.004938	4.032	292	303	17
6509	180	PREDICTED: leucine aminopeptidase 2, chloroplastic isoform 1 [Vitis vinifera]	gi|225445867,gi|297743644	60726.3	0.391	ILDAEQcK	47.9	44	6.47	c7: Carbamidomethyl (+57.02)	488.742	975.469	976.477	2	-0.0009072	-0.9291	304	311	17
6509	180	PREDICTED: leucine aminopeptidase 2, chloroplastic isoform 1 [Vitis vinifera]	gi|225445867,gi|297743644	60726.3	0.391	LDSQLGGLLAEASSEEDFTGK	63.5	45.1	11		723.025	2166.05	2167.04	3	0.01922	8.87	120	140	17
6509	180	PREDICTED: leucine aminopeptidase 2, chloroplastic isoform 1 [Vitis vinifera]	gi|225445867,gi|297743644	60726.3	0.391	LPGLGSK	56.2	41.5	4.52		336.208	670.402	671.409	2	7.806e-05	0.1163	149	155	17
6509	180	PREDICTED: leucine aminopeptidase 2, chloroplastic isoform 1 [Vitis vinifera]	gi|225445867,gi|297743644	60726.3	0.391	MPmEESYWESMK	65.9	30.6	0	m3: Oxidation (+15.99)	782.311	1562.61	1563.62	2	-0.002637	-1.686	505	516	17
6509	180	PREDICTED: leucine aminopeptidase 2, chloroplastic isoform 1 [Vitis vinifera]	gi|225445867,gi|297743644	60726.3	0.391	SGQSTILR	61.8	45.7	3.38		431.244	860.474	861.479	2	0.002658	3.085	141	148	17
6509	180	PREDICTED: leucine aminopeptidase 2, chloroplastic isoform 1 [Vitis vinifera]	gi|225445867,gi|297743644	60726.3	0.391	SLGETVAVAAK	27.6	45.7	8.2		523.299	1044.58	1045.59	2	0.002338	2.236	176	186	17
6509	180	PREDICTED: leucine aminopeptidase 2, chloroplastic isoform 1 [Vitis vinifera]	gi|225445867,gi|297743644	60726.3	0.391	TGPGcSIELmK	55.7	43.1	9.5	c5: Carbamidomethyl (+57.02), m10: Oxidation (+15.99)	604.786	1207.56	1208.57	2	-0.0009423	-0.7796	365	375	17
6509	180	PREDICTED: leucine aminopeptidase 2, chloroplastic isoform 1 [Vitis vinifera]	gi|225445867,gi|297743644	60726.3	0.391	TIEVNNTDAEGR	76	42.8	12.2		659.816	1317.62	1318.62	2	0.0009381	0.7114	430	441	17
6509	180	PREDICTED: leucine aminopeptidase 2, chloroplastic isoform 1 [Vitis vinifera]	gi|225445867,gi|297743644	60726.3	0.391	VQWMHIDMAGPVWNDK	65.8	43.9	0		642.976	1925.9	1926.9	3	0.01265	6.566	547	562	17
6509	180	PREDICTED: leucine aminopeptidase 2, chloroplastic isoform 1 [Vitis vinifera]	gi|225445867,gi|297743644	60726.3	0.391	YAEDVcSGVIFGK	77	42.7	11.4	c6: Carbamidomethyl (+57.02)	722.843	1443.67	1444.68	2	0.0009328	0.6456	258	270	17
6509	180	PREDICTED: 14-3-3 protein [Vitis vinifera]	gi|359492889	29327.1	0.127	IISSIEQK	46.5	44.5	5.26		459.269	916.524	917.53	2	0.001218	1.328	68	75	3
6509	180	PREDICTED: 14-3-3 protein [Vitis vinifera]	gi|359492889	29327.1	0.127	NLLSVAYK	26.7	42.2	3.63		454.264	906.514	907.525	2	-0.003822	-4.211	49	56	3
6509	180	PREDICTED: 14-3-3 protein [Vitis vinifera]	gi|359492889	29327.1	0.127	SAQDIANAELAPTHPIR	63.5	45.6	9.4		601.982	1802.92	1803.93	3	-0.004218	-2.338	160	176	3
6509	180	PREDICTED: UDP-glucose 6-dehydrogenase-like isoform 1 [Vitis vinifera]	gi|225423507	52726	0.237	AADLTYWESAAR	73.5	44.1	11.4		677.326	1352.64	1353.64	2	0.001958	1.447	100	111	7
6509	180	PREDICTED: UDP-glucose 6-dehydrogenase-like isoform 1 [Vitis vinifera]	gi|225423507	52726	0.237	AHLSIYDPQVSGEQIQR	78.6	45.1	11.7		647.668	1939.98	1940.98	3	0.008242	4.246	358	374	7
6509	180	PREDICTED: UDP-glucose 6-dehydrogenase-like isoform 1 [Vitis vinifera]	gi|225423507	52726	0.237	DVYAHWVPVER	37.2	44.3	8.78		457.567	1369.68	1370.69	3	0.001242	0.9062	193	203	7
6509	180	PREDICTED: UDP-glucose 6-dehydrogenase-like isoform 1 [Vitis vinifera]	gi|225423507	52726	0.237	ETPAIDVcK	36	44.1	5.83	c8: Carbamidomethyl (+57.02)	516.756	1031.5	1032.5	2	0.001213	1.175	343	351	7
6509	180	PREDICTED: UDP-glucose 6-dehydrogenase-like isoform 1 [Vitis vinifera]	gi|225423507	52726	0.237	IAILGFAFK	38.5	37.5	7.8		490.305	978.595	979.598	2	0.004958	5.061	327	335	7
6509	180	PREDICTED: UDP-glucose 6-dehydrogenase-like isoform 1 [Vitis vinifera]	gi|225423507	52726	0.237	LAANAFLAQR	52.8	45.1	10.1		537.806	1073.6	1074.61	2	-0.0002019	-0.1879	217	226	7
6509	180	PREDICTED: UDP-glucose 6-dehydrogenase-like isoform 1 [Vitis vinifera]	gi|225423507	52726	0.237	NLFFSTDVEK	15.9	43.1	4.55		600.306	1198.6	1199.59	2	0.009278	7.734	65	74	7
6509	180	PREDICTED: adenosylhomocysteinase-like isoform 1 [Vitis vinifera]	gi|225456806	53061.6	0.266	AEEEYER	22.1	37.1	2.52		463.199	924.383	925.39	2	0.0005581	0.6031	153	159	1
6509	180	PREDICTED: adenosylhomocysteinase-like isoform 1 [Vitis vinifera]	gi|225456806	53061.6	0.266	ALDWGPGGGPDLIVDDGGDATLLIHEGVK	34.6	45	10.1		963.158	2886.45	2887.45	3	0.01164	4.032	124	152	1
6509	180	PREDICTED: adenosylhomocysteinase-like isoform 1 [Vitis vinifera]	gi|225456806	53061.6	0.266	ATDVMIAGK	79.5	45.2	0		453.24	904.466	905.476	2	-0.003082	-3.404	255	263	1
6509	180	PREDICTED: adenosylhomocysteinase-like isoform 1 [Vitis vinifera]	gi|225456806	53061.6	0.266	DMSQADFGR	25.5	37.1	0		513.721	1025.43	1026.43	2	0.004198	4.09	18	26	1
6509	180	PREDICTED: adenosylhomocysteinase-like isoform 1 [Vitis vinifera]	gi|225456806	53061.6	0.266	GETLQEYWWcTER	27	39.5	10.3	c10: Carbamidomethyl (+57.02)	879.39	1756.77	1757.76	2	0.01457	8.29	111	123	1
6509	180	PREDICTED: adenosylhomocysteinase-like isoform 1 [Vitis vinifera]	gi|225456806	53061.6	0.266	HSLPDGLmR	29.4	42.8	2.85	m8: Oxidation (+15.99)	521.259	1040.5	1041.51	2	-0.003157	-3.031	246	254	1
6509	180	PREDICTED: adenosylhomocysteinase-like isoform 1 [Vitis vinifera]	gi|225456806	53061.6	0.266	ITIKPQTDR	46.4	44.8	4.05		536.313	1070.61	1071.62	2	0.002378	2.219	369	377	1
6509	180	PREDICTED: adenosylhomocysteinase-like isoform 1 [Vitis vinifera]	gi|225456806	53061.6	0.266	LVGVSEETTTGVK	93.9	45.4	12.7		660.357	1318.7	1319.71	2	0.001338	1.014	199	211	1
6509	180	PREDICTED: adenosylhomocysteinase-like isoform 1 [Vitis vinifera]	gi|225456806	53061.6	0.266	TEFGPQQPFK	39.8	45.2	7.11		589.799	1177.58	1178.58	2	0.006438	5.463	44	53	1
6509	180	PREDICTED: adenosylhomocysteinase-like isoform 1 [Vitis vinifera]	gi|225456806	53061.6	0.266	VAVVcGYGDVGK	59	44.9	9.1	c5: Carbamidomethyl (+57.02)	612.31	1222.6	1223.61	2	0.002893	2.364	264	275	1
6509	180	PREDICTED: aldehyde dehydrogenase family 2 member B4, mitochondrial [Vitis vinifera]	gi|225424691	58318	0.206	AEVPLVIR	48.5	36.1	6.98		448.783	895.551	896.556	2	0.001998	2.229	157	164	10
6509	180	PREDICTED: aldehyde dehydrogenase family 2 member B4, mitochondrial [Vitis vinifera]	gi|225424691	58318	0.206	AGIEQGPQIDSDQFEK	61.4	43.7	10.8		881.422	1760.83	1761.83	2	0.007318	4.154	374	389	10
6509	180	PREDICTED: aldehyde dehydrogenase family 2 member B4, mitochondrial [Vitis vinifera]	gi|225424691	58318	0.206	AVITPLK	50	37.6	4.48		371.244	740.473	741.487	2	-0.006662	-8.985	527	533	10
6509	180	PREDICTED: aldehyde dehydrogenase family 2 member B4, mitochondrial [Vitis vinifera]	gi|225424691	58318	0.206	GIYSLQNYLQVK	13.7	43.3	5.68		713.397	1424.78	1425.77	2	0.01246	8.738	515	526	10
6509	180	PREDICTED: aldehyde dehydrogenase family 2 member B4, mitochondrial [Vitis vinifera]	gi|225424691	58318	0.206	MSPYER	31	39.9	0		391.681	781.348	782.35	2	0.005278	6.746	116	121	10
6509	180	PREDICTED: aldehyde dehydrogenase family 2 member B4, mitochondrial [Vitis vinifera]	gi|225424691	58318	0.206	SGVENGATLETGGER	50.7	42.6	10.6		738.847	1475.68	1476.69	2	-0.004942	-3.347	396	410	10
6509	180	PREDICTED: aldehyde dehydrogenase family 2 member B4, mitochondrial [Vitis vinifera]	gi|225424691	58318	0.206	SNLKPVTLELGGK	53.3	42.4	11		678.4	1354.79	1355.79	2	0.003298	2.433	297	309	10
6509	180	PREDICTED: aldehyde dehydrogenase family 2 member B4, mitochondrial [Vitis vinifera]	gi|225424691	58318	0.206	TFETLDPR	39.6	44.2	5.73		489.749	977.482	978.489	2	0.0005781	0.5908	74	81	10
6509	180	PREDICTED: aldehyde dehydrogenase family 2 member B4, mitochondrial [Vitis vinifera]	gi|225424691	58318	0.206	TGNVIASVAEGDAEDVNR	68.1	44.2	11.5		908.94	1815.87	1816.87	2	0.005958	3.279	82	99	10
6509	180	PREDICTED: aldehyde dehydrogenase family 2 member B4, mitochondrial [Vitis vinifera]	gi|225424691	58318	0.206	YYAGWADK	28.8	38.9	5.56		487.226	972.437	973.441	2	0.003178	3.265	168	175	10
6509	180	PREDICTED: ruBisCO large subunit-binding protein subunit alpha, chloroplastic-like [Vitis vinifera]	gi|359479362	61967	0.0819	DSTTIIADAASKDEIQAR	79.2	45.3	12.6		635.656	1903.95	1904.96	3	-0.003638	-1.91	372	389	2
6509	180	PREDICTED: ruBisCO large subunit-binding protein subunit alpha, chloroplastic-like [Vitis vinifera]	gi|359479362	61967	0.0819	NATFAAIEEGIVPGGGAAFVHLSTYVPAIK	18.2	42.8	10.5		1000.87	2999.59	3000.58	3	0.01386	4.62	445	474	2
6509	180	PREDICTED: selenium-binding protein 1 [Vitis vinifera]	gi|225433514	52322.2	0.15	FLVLPSLVSGR	41.1	38.3	9.73		594.365	1186.72	1187.71	2	0.008298	6.987	93	103	6
6509	180	PREDICTED: selenium-binding protein 1 [Vitis vinifera]	gi|225433514	52322.2	0.15	GFNLQHVSDGLYGK	18.4	45.1	6.58		512.26	1533.76	1534.77	3	0.001002	0.6529	213	226	6
6509	180	PREDICTED: selenium-binding protein 1 [Vitis vinifera]	gi|225433514	52322.2	0.15	GKPDYLATVDVDPSSPSYSK	52.9	44.4	10.4		709.345	2125.01	2126.03	3	-0.01019	-4.792	39	58	6
6509	180	PREDICTED: selenium-binding protein 1 [Vitis vinifera]	gi|225433514	52322.2	0.15	IYAIDTQK	42.2	43.8	6.04		476.26	950.506	951.515	2	-0.001722	-1.81	104	111	6
6509	180	PREDICTED: selenium-binding protein 1 [Vitis vinifera]	gi|225433514	52322.2	0.15	QYNIEDPK	21.2	43.7	4.01		503.744	1005.47	1006.48	2	-0.002862	-2.844	335	342	6
6509	180	PREDICTED: selenium-binding protein 1 [Vitis vinifera]	gi|225433514	52322.2	0.15	VVEPEDILKK	36.9	41.9	2.01		390.566	1168.68	1169.68	3	0.005452	4.661	121	130	6
6509	180	PREDICTED: adenosylhomocysteinase isoform 1 [Vitis vinifera]	gi|225433506	53164	0.305	ALDWGPGGGPDLIVDDGGDATLLIHEGVK	34.6	45	10.1		963.158	2886.45	2887.45	3	0.01164	4.032	124	152	11
6509	180	PREDICTED: adenosylhomocysteinase isoform 1 [Vitis vinifera]	gi|225433506	53164	0.305	ATDVMIAGK	79.5	45.2	0		453.24	904.466	905.476	2	-0.003082	-3.404	255	263	11
6509	180	PREDICTED: adenosylhomocysteinase isoform 1 [Vitis vinifera]	gi|225433506	53164	0.305	DIIMVDHMR	43.3	41.8	0		377.187	1128.54	1129.55	3	-0.001858	-1.645	329	337	11
6509	180	PREDICTED: adenosylhomocysteinase isoform 1 [Vitis vinifera]	gi|225433506	53164	0.305	DMSQADFGR	25.5	37.1	0		513.721	1025.43	1026.43	2	0.004198	4.09	18	26	11
6509	180	PREDICTED: adenosylhomocysteinase isoform 1 [Vitis vinifera]	gi|225433506	53164	0.305	GETLQEYWWcTER	27	39.5	10.3	c10: Carbamidomethyl (+57.02)	879.39	1756.77	1757.76	2	0.01457	8.29	111	123	11
6509	180	PREDICTED: adenosylhomocysteinase isoform 1 [Vitis vinifera]	gi|225433506	53164	0.305	HSLPDGLmR	29.4	42.8	2.85	m8: Oxidation (+15.99)	521.259	1040.5	1041.51	2	-0.003157	-3.031	246	254	11
6509	180	PREDICTED: adenosylhomocysteinase isoform 1 [Vitis vinifera]	gi|225433506	53164	0.305	ITIKPQTDR	46.4	44.8	4.05		536.313	1070.61	1071.62	2	0.002378	2.219	369	377	11
6509	180	PREDICTED: adenosylhomocysteinase isoform 1 [Vitis vinifera]	gi|225433506	53164	0.305	LVGVSEETTTGVK	93.9	45.4	12.7		660.357	1318.7	1319.71	2	0.001338	1.014	199	211	11
6509	180	PREDICTED: adenosylhomocysteinase isoform 1 [Vitis vinifera]	gi|225433506	53164	0.305	TEFGPQQPFK	39.8	45.2	7.11		589.799	1177.58	1178.58	2	0.006438	5.463	44	53	11
6509	180	PREDICTED: adenosylhomocysteinase isoform 1 [Vitis vinifera]	gi|225433506	53164	0.305	VAVVcGYGDVGK	59	44.9	9.1	c5: Carbamidomethyl (+57.02)	612.31	1222.6	1223.61	2	0.002893	2.364	264	275	11
6509	180	PREDICTED: adenosylhomocysteinase isoform 1 [Vitis vinifera]	gi|225433506	53164	0.305	WVFPDTNSGIIVLAEGR	108	45.3	14		937.491	1872.97	1873.98	2	-0.006682	-3.566	378	394	11
6509	180	PREDICTED: glutamate decarboxylase 1 [Vitis vinifera]	gi|225466257	55212.7	0.113	HLNDLLTK	33.4	40.1	10.2		477.274	952.534	953.542	2	9.806e-05	0.1028	223	230	4
6509	180	PREDICTED: glutamate decarboxylase 1 [Vitis vinifera]	gi|225466257	55212.7	0.113	LVTDIQK	46.9	45	1.95		408.746	815.478	816.483	2	0.002618	3.206	433	439	4
6509	180	PREDICTED: glutamate decarboxylase 1 [Vitis vinifera]	gi|225466257	55212.7	0.113	NIMENcQENAR	26.3	36.8	0	c6: Carbamidomethyl (+57.02)	689.795	1377.57	1378.58	2	-0.001727	-1.253	342	352	4
6509	180	PREDICTED: glutamate decarboxylase 1 [Vitis vinifera]	gi|225466257	55212.7	0.113	NYVDmDEYPVTTELQNR	70.5	40.8	10.1	m5: Oxidation (+15.99)	701.651	2101.93	2102.93	3	0.003647	1.734	83	99	4
6509	180	PREDICTED: glutamate decarboxylase 1 [Vitis vinifera]	gi|225466257	55212.7	0.113	VSLPR	36.4	39.8	0		286.181	570.348	571.356	2	-0.001122	-1.964	25	29	4
6509	180	PREDICTED: glutamate decarboxylase 1 [Vitis vinifera]	gi|225466257	55212.7	0.113	YFEVELK	41.1	41.9	5.31		464.245	926.476	927.482	2	0.0009581	1.033	173	179	4
6509	180	PREDICTED: enolase 1 [Vitis vinifera]	gi|225441000	47856.4	0.568	AcNALLLK	43.5	46.9	8.64	c2: Carbamidomethyl (+57.02)	451.76	901.505	902.513	2	-0.0006072	-0.6728	345	352	20
6509	180	PREDICTED: enolase 1 [Vitis vinifera]	gi|225441000	47856.4	0.568	AGWGVmASHR	41.1	40.5	5.57	m6: Oxidation (+15.99)	544.258	1086.5	1087.51	2	-0.001777	-1.634	372	381	20
6509	180	PREDICTED: enolase 1 [Vitis vinifera]	gi|225441000	47856.4	0.568	DGGSDYLGK	62.9	40.2	8.19		456.209	910.404	911.411	2	0.0008981	0.9853	53	61	20
6509	180	PREDICTED: enolase 1 [Vitis vinifera]	gi|225441000	47856.4	0.568	DPSDQTGIDNFMVQQLDGTVNEWGWcK	101	40	0	c26: Carbamidomethyl (+57.02)	1047.47	3139.39	3140.37	3	0.02437	7.759	82	108	20
6509	180	PREDICTED: enolase 1 [Vitis vinifera]	gi|225441000	47856.4	0.568	EGLELLK	55.2	44.9	4.23		401.24	800.466	801.472	2	0.0009181	1.145	227	233	20
6509	180	PREDICTED: enolase 1 [Vitis vinifera]	gi|225441000	47856.4	0.568	GNPTVEVDIGLSNGAK	61.4	44.7	9.32		785.907	1569.8	1570.81	2	-0.001022	-0.6506	17	32	20
6509	180	PREDICTED: enolase 1 [Vitis vinifera]	gi|225441000	47856.4	0.568	HIANIAGNK	50.5	42.5	10.7		469.264	936.513	937.521	2	-0.001282	-1.367	138	146	20
6509	180	PREDICTED: enolase 1 [Vitis vinifera]	gi|225441000	47856.4	0.568	HLVLPVPAFNVINGGSHAGNK	58.2	42.3	12.1		714.398	2140.17	2141.16	3	0.01859	8.683	147	167	20
6509	180	PREDICTED: enolase 1 [Vitis vinifera]	gi|225441000	47856.4	0.568	ISGDALK	36.4	47.5	-0.805		352.203	702.392	703.399	2	0.0001981	0.2816	278	284	20
6509	180	PREDICTED: enolase 1 [Vitis vinifera]	gi|225441000	47856.4	0.568	KYGQDATNVGDEGGFAPNIQENK	100	43.2	11.7		818.05	2451.13	2452.14	3	-0.002158	-0.88	204	226	20
6509	180	PREDICTED: enolase 1 [Vitis vinifera]	gi|225441000	47856.4	0.568	LAmQEFMILPIGAPSFK	57	44.7	0	m3: Oxidation (+15.99)	637.006	1908	1909	3	0.008397	4.399	168	184	20
6509	180	PREDICTED: enolase 1 [Vitis vinifera]	gi|225441000	47856.4	0.568	LTcEIGEK	47.5	43.6	6.17	c3: Carbamidomethyl (+57.02)	475.236	948.456	949.466	2	-0.002407	-2.535	314	321	20
6509	180	PREDICTED: enolase 1 [Vitis vinifera]	gi|225441000	47856.4	0.568	mGVEVYHHLK	29.2	43.2	2.76	m1: Oxidation (+15.99)	410.209	1227.6	1228.61	3	-0.002303	-1.874	189	198	20
6509	180	PREDICTED: enolase 1 [Vitis vinifera]	gi|225441000	47856.4	0.568	QIFDSR	36.8	45.6	-0.344		383.2	764.385	765.389	2	0.003678	4.805	11	16	20
6509	180	PREDICTED: enolase 1 [Vitis vinifera]	gi|225441000	47856.4	0.568	TYDLNFK	40	41.2	2.32		450.726	899.436	900.446	2	-0.002522	-2.801	262	268	20
6509	180	PREDICTED: enolase 1 [Vitis vinifera]	gi|225441000	47856.4	0.568	TYDLNFKEENNDGSEK	74.1	39.7	12.8		951.923	1901.83	1902.84	2	0.002358	1.239	262	277	20
6509	180	PREDICTED: enolase 1 [Vitis vinifera]	gi|225441000	47856.4	0.568	VNQIGTVTESIEAVK	65.2	44.9	11.3		794.433	1586.85	1587.86	2	-0.0007819	-0.4925	353	367	20
6509	180	PREDICTED: enolase 1 [Vitis vinifera]	gi|225441000	47856.4	0.568	VTIQFVK	47.3	40.5	6.88		417.758	833.502	834.508	2	0.001138	1.364	2	8	20
6509	180	PREDICTED: enolase 1 [Vitis vinifera]	gi|225441000	47856.4	0.568	YGQDATNVGDEGGFAPNIQENK	63.4	41.8	8.15		775.356	2323.05	2324.04	3	0.01012	4.355	205	226	20
6509	180	PREDICTED: enolase 1 [Vitis vinifera]	gi|225441000	47856.4	0.568	YNQLLR	30.6	44	1.69		403.731	805.447	806.452	2	0.002278	2.825	416	421	20
6509	180	PREDICTED: glutamate decarboxylase-like [Vitis vinifera]	gi|225462892	57108.9	0.253	ATHVIATVDETR	44.1	44.2	9.87		438.233	1311.68	1312.69	3	-0.0005979	-0.4555	455	466	11
6509	180	PREDICTED: glutamate decarboxylase-like [Vitis vinifera]	gi|225462892	57108.9	0.253	DTSNYTVFDISNNLR	94.1	43.8	11.7		879.926	1757.84	1758.83	2	0.01546	8.789	382	396	11
6509	180	PREDICTED: glutamate decarboxylase-like [Vitis vinifera]	gi|225462892	57108.9	0.253	EAAFQIISDELmLDGNPR	39.7	45.2	10.8	m12: Oxidation (+15.99)	679.004	2033.99	2034.98	3	0.01643	8.072	40	57	11
6509	180	PREDICTED: glutamate decarboxylase-like [Vitis vinifera]	gi|225462892	57108.9	0.253	EGYYVMDPVK	76.7	41.6	0		600.784	1199.55	1200.56	2	0.0009381	0.7813	185	194	11
6509	180	PREDICTED: glutamate decarboxylase-like [Vitis vinifera]	gi|225462892	57108.9	0.253	FEIVSK	35.2	41.8	1.37		361.708	721.402	722.408	2	0.001018	1.409	364	369	11
6509	180	PREDICTED: glutamate decarboxylase-like [Vitis vinifera]	gi|225462892	57108.9	0.253	LGFEGYK	37.3	40	2.34		407.21	812.406	813.414	2	-0.001302	-1.601	335	341	11
6509	180	PREDICTED: glutamate decarboxylase-like [Vitis vinifera]	gi|225462892	57108.9	0.253	LLSDIEK	35.6	45.4	2.24		409.238	816.461	817.467	2	0.001418	1.735	433	439	11
6509	180	PREDICTED: glutamate decarboxylase-like [Vitis vinifera]	gi|225462892	57108.9	0.253	NYVDmDEYPVTTELQNR	70.5	40.8	10.1	m5: Oxidation (+15.99)	701.651	2101.93	2102.93	3	0.003647	1.734	83	99	11
6509	180	PREDICTED: glutamate decarboxylase-like [Vitis vinifera]	gi|225462892	57108.9	0.253	QGLVETGR	55.4	45.3	5.82		430.235	858.456	859.463	2	-0.0006019	-0.7004	356	363	11
6509	180	PREDICTED: glutamate decarboxylase-like [Vitis vinifera]	gi|225462892	57108.9	0.253	YFEVELK	41.1	41.9	5.31		464.245	926.476	927.482	2	0.0009581	1.033	173	179	11
6509	180	PREDICTED: glutamate decarboxylase-like [Vitis vinifera]	gi|225462892	57108.9	0.253	YGWIIPAYTMPPDAEHIAVLR	62	44.9	0		805.088	2412.24	2413.24	3	0.0122	5.056	398	418	11
6509	180	RecName: Full=S-adenosylmethionine synthase 2; Short=AdoMet synthase 2; AltName: Full=Methionine adenosyltransferase 2; Short=MAT 2	gi|223635284	43095.8	0.44	EHVIKPVIPEK	60.1	39.7	11		644.89	1287.76	1288.76	2	0.009638	7.478	212	222	10
6509	180	RecName: Full=S-adenosylmethionine synthase 2; Short=AdoMet synthase 2; AltName: Full=Methionine adenosyltransferase 2; Short=MAT 2	gi|223635284	43095.8	0.44	FVIGGPHGDAGLTGR	49.8	44.7	10.7		485.257	1452.75	1453.75	3	0.0005421	0.3729	238	252	10
6509	180	RecName: Full=S-adenosylmethionine synthase 2; Short=AdoMet synthase 2; AltName: Full=Methionine adenosyltransferase 2; Short=MAT 2	gi|223635284	43095.8	0.44	LcDQISDAVLDAcLQQDPDSK	85.3	42.8	12.5	c2: Carbamidomethyl (+57.02), c13: Carbamidomethyl (+57.02)	797.706	2390.1	2391.08	3	0.02159	9.03	19	39	10
6509	180	RecName: Full=S-adenosylmethionine synthase 2; Short=AdoMet synthase 2; AltName: Full=Methionine adenosyltransferase 2; Short=MAT 2	gi|223635284	43095.8	0.44	RPEEIGAGDQGHMFGYATDETPELMPLSHVLATK	86.1	44.4	0		740.364	3696.78	3697.76	5	0.0279	7.545	114	147	10
6509	180	RecName: Full=S-adenosylmethionine synthase 2; Short=AdoMet synthase 2; AltName: Full=Methionine adenosyltransferase 2; Short=MAT 2	gi|223635284	43095.8	0.44	TAAYGHFGR	31.1	44.4	6.97		490.241	978.468	979.474	2	0.0006781	0.6923	365	373	10
6509	180	RecName: Full=S-adenosylmethionine synthase 2; Short=AdoMet synthase 2; AltName: Full=Methionine adenosyltransferase 2; Short=MAT 2	gi|223635284	43095.8	0.44	TIFHLNPSGR	53.7	43.2	10.5		571.31	1140.61	1141.61	2	0.001598	1.4	228	237	10
6509	180	RecName: Full=S-adenosylmethionine synthase 2; Short=AdoMet synthase 2; AltName: Full=Methionine adenosyltransferase 2; Short=MAT 2	gi|223635284	43095.8	0.44	TNMVMVFGEITTK	58.8	44.4	0		735.873	1469.73	1470.73	2	0.005558	3.779	48	60	10
6509	180	RecName: Full=S-adenosylmethionine synthase 2; Short=AdoMet synthase 2; AltName: Full=Methionine adenosyltransferase 2; Short=MAT 2	gi|223635284	43095.8	0.44	TQVTVEYHNDGGAR	74	43.1	11.7		516.246	1545.72	1546.72	3	1.206e-05	0.007796	170	183	10
6509	180	RecName: Full=S-adenosylmethionine synthase 2; Short=AdoMet synthase 2; AltName: Full=Methionine adenosyltransferase 2; Short=MAT 2	gi|223635284	43095.8	0.44	VHTVLISTQHDETVTNDEIAADLK	141	45.3	16.4		883.776	2648.31	2649.34	3	-0.02296	-8.666	188	211	10
6509	180	RecName: Full=S-adenosylmethionine synthase 2; Short=AdoMet synthase 2; AltName: Full=Methionine adenosyltransferase 2; Short=MAT 2	gi|223635284	43095.8	0.44	VLVNIEQQSPDIAQGVHGHLTK	49.5	43.3	11.9		795.099	2382.27	2383.27	3	0.008042	3.374	92	113	10
6509	180	ATPase subunit 1 [Vitis vinifera]	gi|224365668	55126.8	0.187	AAELTTLLESR	48.1	44.9	10.4		602.336	1202.66	1203.66	2	0.005718	4.751	7	17	10
6509	180	ATPase subunit 1 [Vitis vinifera]	gi|224365668	55126.8	0.187	APGIIER	46.3	40.3	5.45		378.223	754.432	755.441	2	-0.001922	-2.544	135	141	10
6509	180	ATPase subunit 1 [Vitis vinifera]	gi|224365668	55126.8	0.187	AVDSLVPIGR	56.9	41.5	8.97		513.801	1025.59	1026.59	2	0.0009381	0.9138	154	163	10
6509	180	ATPase subunit 1 [Vitis vinifera]	gi|224365668	55126.8	0.187	EAFPGDVFYLHSR	68.2	44.8	9.79		513.255	1536.74	1537.74	3	0.005802	3.773	295	307	10
6509	180	ATPase subunit 1 [Vitis vinifera]	gi|224365668	55126.8	0.187	ELIIGDR	43.9	44.3	1.44		408.236	814.457	815.462	2	0.001818	2.229	167	173	10
6509	180	ATPase subunit 1 [Vitis vinifera]	gi|224365668	55126.8	0.187	ITNFYTNLK	50.2	43.2	8.37		557.3	1112.59	1113.59	2	-0.0007419	-0.6663	18	26	10
6509	180	ATPase subunit 1 [Vitis vinifera]	gi|224365668	55126.8	0.187	MPLDR	33.5	42.8	0		316.166	630.318	631.323	2	0.001918	3.038	459	463	10
6509	180	ATPase subunit 1 [Vitis vinifera]	gi|224365668	55126.8	0.187	QPQYAPLPIEK	47.5	43.2	6.49		642.354	1282.69	1283.7	2	0.0005181	0.4036	433	443	10
6509	180	ATPase subunit 1 [Vitis vinifera]	gi|224365668	55126.8	0.187	TAIAIDTILNQK	63	43.2	11.1		650.883	1299.75	1300.75	2	0.01216	9.347	178	189	10
6509	180	ATPase subunit 1 [Vitis vinifera]	gi|224365668	55126.8	0.187	VVSVGDGIAR	45.4	45.4	6.1		486.775	971.536	972.547	2	-0.003862	-3.971	33	42	10
6509	180	PREDICTED: serine hydroxymethyltransferase 1 [Vitis vinifera]	gi|225433510	51889.9	0.183	IGAPAMTSR	59	46.5	0		452.24	902.465	903.472	2	0.0004381	0.4849	390	398	8
6509	180	PREDICTED: serine hydroxymethyltransferase 1 [Vitis vinifera]	gi|225433510	51889.9	0.183	ISATSIYFESLPYK	31.8	45.4	7.88		809.927	1617.84	1618.84	2	0.01036	6.398	147	160	8
6509	180	PREDICTED: serine hydroxymethyltransferase 1 [Vitis vinifera]	gi|225433510	51889.9	0.183	LcDLcNITVNK	72.4	44.1	10.9	c2: Carbamidomethyl (+57.02), c5: Carbamidomethyl (+57.02)	675.33	1348.64	1349.66	2	-0.003733	-2.766	363	373	8
6509	180	PREDICTED: serine hydroxymethyltransferase 1 [Vitis vinifera]	gi|225433510	51889.9	0.183	LIIcGGSAYPR	40.4	45.1	8.26	c4: Carbamidomethyl (+57.02)	603.817	1205.62	1206.63	2	-0.002527	-2.094	184	194	8
6509	180	PREDICTED: serine hydroxymethyltransferase 1 [Vitis vinifera]	gi|225433510	51889.9	0.183	NAVFGDSSALAPGGVR	95.2	45.5	12.2		759.387	1516.76	1517.77	2	-0.003162	-2.083	374	389	8
6509	180	PREDICTED: serine hydroxymethyltransferase 1 [Vitis vinifera]	gi|225433510	51889.9	0.183	VSSTTGYIDYDR	51.6	41.8	9.24		688.821	1375.63	1376.63	2	0.0007381	0.5361	161	172	8
6509	180	PREDICTED: serine hydroxymethyltransferase 1 [Vitis vinifera]	gi|225433510	51889.9	0.183	VSSTTGYIDYDRLEEK	51.5	44.5	9.45		625.971	1874.89	1875.9	3	0.001082	0.5768	161	176	8
6509	180	PREDICTED: serine hydroxymethyltransferase 1 [Vitis vinifera]	gi|225433510	51889.9	0.183	YSEGmPGNR	46	37.7	5.94	m5: Oxidation (+15.99)	513.72	1025.43	1026.43	2	0.001703	1.659	59	67	8
6509	180	RecName: Full=Ribulose bisphosphate carboxylase large chain; Short=RuBisCO large subunit; Flags: Precursor	gi|115311623,gi|147769051,gi|46275228	52501.5	0.274	AMHAVIDR	41.1	42.2	0		304.83	911.468	912.472	3	0.003102	3.4	296	303	11
6509	180	RecName: Full=Ribulose bisphosphate carboxylase large chain; Short=RuBisCO large subunit; Flags: Precursor	gi|115311623,gi|147769051,gi|46275228	52501.5	0.274	AVYEcLR	30.1	43.6	-0.378	c5: Carbamidomethyl (+57.02)	455.728	909.442	910.445	2	0.004313	4.737	188	194	11
6509	180	RecName: Full=Ribulose bisphosphate carboxylase large chain; Short=RuBisCO large subunit; Flags: Precursor	gi|115311623,gi|147769051,gi|46275228	52501.5	0.274	DDENVNSQPFMR	37.5	38.4	0		726.315	1450.62	1451.62	2	0.001238	0.8529	202	213	11
6509	180	RecName: Full=Ribulose bisphosphate carboxylase large chain; Short=RuBisCO large subunit; Flags: Precursor	gi|115311623,gi|147769051,gi|46275228	52501.5	0.274	DDFVEKDR	59.2	43	8.77		512.241	1022.47	1023.47	2	0.001018	0.9947	351	358	11
6509	180	RecName: Full=Ribulose bisphosphate carboxylase large chain; Short=RuBisCO large subunit; Flags: Precursor	gi|115311623,gi|147769051,gi|46275228	52501.5	0.274	EGNEIIR	41.8	43.4	2.78		415.722	829.43	830.437	2	0.0007781	0.9369	440	446	11
6509	180	RecName: Full=Ribulose bisphosphate carboxylase large chain; Short=RuBisCO large subunit; Flags: Precursor	gi|115311623,gi|147769051,gi|46275228	52501.5	0.274	FLFcAEAIFK	44.2	45.1	10.2	c4: Carbamidomethyl (+57.02)	623.323	1244.63	1245.63	2	0.005453	4.377	218	227	11
6509	180	RecName: Full=Ribulose bisphosphate carboxylase large chain; Short=RuBisCO large subunit; Flags: Precursor	gi|115311623,gi|147769051,gi|46275228	52501.5	0.274	GGLDFTKDDENVNSQPFMR	41.2	42.4	0		724.002	2168.98	2169.99	3	0.003272	1.508	195	213	11
6509	180	RecName: Full=Ribulose bisphosphate carboxylase large chain; Short=RuBisCO large subunit; Flags: Precursor	gi|115311623,gi|147769051,gi|46275228	52501.5	0.274	IPPAYSK	41.3	46.9	1.96		388.221	774.428	775.435	2	-2.194e-05	-0.0283	140	146	11
6509	180	RecName: Full=Ribulose bisphosphate carboxylase large chain; Short=RuBisCO large subunit; Flags: Precursor	gi|115311623,gi|147769051,gi|46275228	52501.5	0.274	LTYYTPEYETKPTDILAAFR	61.9	45.2	9.92		798.078	2391.21	2392.21	3	0.01087	4.545	22	41	11
6509	180	RecName: Full=Ribulose bisphosphate carboxylase large chain; Short=RuBisCO large subunit; Flags: Precursor	gi|115311623,gi|147769051,gi|46275228	52501.5	0.274	SQAETGEIK	32.8	44.6	5.59		481.744	961.473	962.479	2	0.0008181	0.8499	228	236	11
6509	180	RecName: Full=Ribulose bisphosphate carboxylase large chain; Short=RuBisCO large subunit; Flags: Precursor	gi|115311623,gi|147769051,gi|46275228	52501.5	0.274	TFQGPPHGIQVER	86.4	45.3	10.5		733.384	1464.75	1465.75	2	0.006598	4.501	147	159	11
6509	180	PREDICTED: enolase [Vitis vinifera]	gi|225455555	48092.9	0.258	AcNALLLK	43.5	46.9	8.64	c2: Carbamidomethyl (+57.02)	451.76	901.505	902.513	2	-0.0006072	-0.6728	346	353	1
6509	180	PREDICTED: enolase [Vitis vinifera]	gi|225455555	48092.9	0.258	AGWGVmASHR	41.1	40.5	5.57	m6: Oxidation (+15.99)	544.258	1086.5	1087.51	2	-0.001777	-1.634	373	382	1
6509	180	PREDICTED: enolase [Vitis vinifera]	gi|225455555	48092.9	0.258	EGLELLK	55.2	44.9	4.23		401.24	800.466	801.472	2	0.0009181	1.145	227	233	1
6509	180	PREDICTED: enolase [Vitis vinifera]	gi|225455555	48092.9	0.258	HIANLAGNK	50.5	42.5	10.7		469.264	936.513	937.521	2	-0.001282	-1.367	138	146	1
6509	180	PREDICTED: enolase [Vitis vinifera]	gi|225455555	48092.9	0.258	KYGQDATNVGDEGGFAPNIQENK	100	43.2	11.7		818.05	2451.13	2452.14	3	-0.002158	-0.88	204	226	1
6509	180	PREDICTED: enolase [Vitis vinifera]	gi|225455555	48092.9	0.258	mGVEVYHHLK	29.2	43.2	2.76	m1: Oxidation (+15.99)	410.209	1227.6	1228.61	3	-0.002303	-1.874	189	198	1
6509	180	PREDICTED: enolase [Vitis vinifera]	gi|225455555	48092.9	0.258	QIFDSR	36.8	45.6	-0.344		383.2	764.385	765.389	2	0.003678	4.805	11	16	1
6509	180	PREDICTED: enolase [Vitis vinifera]	gi|225455555	48092.9	0.258	TYDLNFK	40	41.2	2.32		450.726	899.436	900.446	2	-0.002522	-2.801	263	269	1
6509	180	PREDICTED: enolase [Vitis vinifera]	gi|225455555	48092.9	0.258	VNQIGSVTESIEAVK	34.5	45.1	10.9		525.287	1572.84	1573.84	3	0.002512	1.596	354	368	1
6509	180	PREDICTED: enolase [Vitis vinifera]	gi|225455555	48092.9	0.258	YGQDATNVGDEGGFAPNIQENK	63.4	41.8	8.15		775.356	2323.05	2324.04	3	0.01012	4.355	205	226	1
6509	180	PREDICTED: enolase [Vitis vinifera]	gi|225455555	48092.9	0.258	YNQLLR	30.6	44	1.69		403.731	805.447	806.452	2	0.002278	2.825	417	422	1
6624	181	PREDICTED: adenosylhomocysteinase isoform 1 [Vitis vinifera]	gi|225433506	53164	0.0433	ITIKPQTDR	37.5	44.8	2.96		357.878	1070.61	1071.62	3	0.003772	3.52	369	377	2
6624	181	PREDICTED: adenosylhomocysteinase isoform 1 [Vitis vinifera]	gi|225433506	53164	0.0433	VAVVcGYGDVGK	81.7	44.9	10.4	c5: Carbamidomethyl (+57.02)	612.308	1222.6	1223.61	2	-0.0003472	-0.2838	264	275	2
6624	181	PREDICTED: d-3-phosphoglycerate dehydrogenase, chloroplastic-like [Vitis vinifera]	gi|225428898	62538	0.133	APDDLDTR	60.9	39.4	5.35		451.714	901.414	902.422	2	-0.0002819	-0.3124	413	420	8
6624	181	PREDICTED: d-3-phosphoglycerate dehydrogenase, chloroplastic-like [Vitis vinifera]	gi|225428898	62538	0.133	EVFEASSGR	50.6	43.2	6.54		491.236	980.458	981.463	2	0.001638	1.669	108	116	8
6624	181	PREDICTED: d-3-phosphoglycerate dehydrogenase, chloroplastic-like [Vitis vinifera]	gi|225428898	62538	0.133	GGVIDEEALVR	32.3	44.9	5.4		579.312	1156.61	1157.62	2	-0.0003819	-0.3299	284	294	8
6624	181	PREDICTED: d-3-phosphoglycerate dehydrogenase, chloroplastic-like [Vitis vinifera]	gi|225428898	62538	0.133	ISLcDALIVR	57.4	45.2	11.1	c4: Carbamidomethyl (+57.02)	580.333	1158.65	1159.65	2	0.007733	6.668	91	100	8
6624	181	PREDICTED: d-3-phosphoglycerate dehydrogenase, chloroplastic-like [Vitis vinifera]	gi|225428898	62538	0.133	LAVQLVSGGSGVK	60.8	43.8	9.78		607.857	1213.7	1214.71	2	-0.004082	-3.36	390	402	8
6624	181	PREDICTED: d-3-phosphoglycerate dehydrogenase, chloroplastic-like [Vitis vinifera]	gi|225428898	62538	0.133	NVAQADASVK	19.4	44.6	4.64		501.764	1001.51	1002.52	2	-0.0004619	-0.4608	167	176	8
6624	181	PREDICTED: d-3-phosphoglycerate dehydrogenase, chloroplastic-like [Vitis vinifera]	gi|225428898	62538	0.133	TLAVmGFGK	32.5	44	6.03	m5: Oxidation (+15.99)	470.251	938.488	939.497	2	-0.001617	-1.721	194	202	8
6624	181	PREDICTED: d-3-phosphoglycerate dehydrogenase, chloroplastic-like [Vitis vinifera]	gi|225428898	62538	0.133	YVGVSLVGK	42.3	41	9.44		461.274	920.533	921.54	2	0.0001581	0.1715	185	193	8
6624	181	RecName: Full=NADP-dependent malic enzyme; Short=NADP-ME	gi|1708924,gi|225445108	65210.9	0.088	IQVIVVTDGER	43	44.7	8.32		614.845	1227.68	1228.69	2	-0.006862	-5.585	182	192	5
6624	181	RecName: Full=NADP-dependent malic enzyme; Short=NADP-ME	gi|1708924,gi|225445108	65210.9	0.088	LPQPENLVK	38.9	40.3	8.46		519.303	1036.59	1037.6	2	5.806e-05	0.05595	568	576	5
6624	181	RecName: Full=NADP-dependent malic enzyme; Short=NADP-ME	gi|1708924,gi|225445108	65210.9	0.088	QVTQENFDK	50.7	43.1	6.52		554.765	1107.52	1108.53	2	-0.003242	-2.925	526	534	5
6624	181	RecName: Full=NADP-dependent malic enzyme; Short=NADP-ME	gi|1708924,gi|225445108	65210.9	0.088	QYQVPLQK	23.6	45.6	5.67		502.283	1002.55	1003.56	2	0.0005981	0.5959	101	108	5
6624	181	RecName: Full=NADP-dependent malic enzyme; Short=NADP-ME	gi|1708924,gi|225445108	65210.9	0.088	VIKPTVLIGSSGVGK	21.3	37.4	3.65		485.635	1453.88	1454.89	3	-0.003568	-2.452	409	423	5
6624	181	succinate dehydrogenase [ubiquinone] flavoprotein subunit, mitochondrial [Puccinia graminis f. sp. tritici CRL 75-36-700-3]	gi|375168363	70859.2	0.0831	AGLPLQDLEFVQFHPTGIYGAGcLITEGSR	20.9	44.6	8.07	c23: Carbamidomethyl (+57.02)	1082.89	3245.64	3246.63	3	0.02554	7.866	283	312	1
6624	181	succinate dehydrogenase [ubiquinone] flavoprotein subunit, mitochondrial [Puccinia graminis f. sp. tritici CRL 75-36-700-3]	gi|375168363	70859.2	0.0831	LGANSLLDIVVFGR	98.4	41.9	11.2		737.427	1472.84	1473.84	2	0.004518	3.065	454	467	1
6624	181	succinate dehydrogenase [ubiquinone] flavoprotein subunit, mitochondrial [Puccinia graminis f. sp. tritici CRL 75-36-700-3]	gi|375168363	70859.2	0.0831	VMQNDAAVFR	54.3	44.6	0		575.788	1149.56	1150.57	2	0.001538	1.337	520	529	1
6624	181	PREDICTED: d-3-phosphoglycerate dehydrogenase, chloroplastic-like [Vitis vinifera]	gi|225443272	66269	0.127	DPDDLDTR	37.8	36.7	10.9		473.71	945.405	946.412	2	0.0009181	0.97	442	449	8
6624	181	PREDICTED: d-3-phosphoglycerate dehydrogenase, chloroplastic-like [Vitis vinifera]	gi|225443272	66269	0.127	GGVIDEDALVR	63.8	44	8.53		572.301	1142.59	1143.6	2	-0.005702	-4.986	313	323	8
6624	181	PREDICTED: d-3-phosphoglycerate dehydrogenase, chloroplastic-like [Vitis vinifera]	gi|225443272	66269	0.127	IFNDETFAK	13.6	43.7	4.35		542.772	1083.53	1084.53	2	0.005998	5.531	292	300	8
6624	181	PREDICTED: d-3-phosphoglycerate dehydrogenase, chloroplastic-like [Vitis vinifera]	gi|225443272	66269	0.127	ISLcDALIVR	57.4	45.2	11.1	c4: Carbamidomethyl (+57.02)	580.333	1158.65	1159.65	2	0.007733	6.668	120	129	8
6624	181	PREDICTED: d-3-phosphoglycerate dehydrogenase, chloroplastic-like [Vitis vinifera]	gi|225443272	66269	0.127	LAVQLVAGGSGIK	61.4	40.9	11.7		606.867	1211.72	1212.73	2	-0.005042	-4.158	419	431	8
6624	181	PREDICTED: d-3-phosphoglycerate dehydrogenase, chloroplastic-like [Vitis vinifera]	gi|225443272	66269	0.127	QVDQPGmIGR	36.3	43	4.66	m7: Oxidation (+15.99)	558.777	1115.54	1116.55	2	-0.001037	-0.9287	557	566	8
6624	181	PREDICTED: d-3-phosphoglycerate dehydrogenase, chloroplastic-like [Vitis vinifera]	gi|225443272	66269	0.127	TLAVmGFGK	32.5	44	6.03	m5: Oxidation (+15.99)	470.251	938.488	939.497	2	-0.001617	-1.721	223	231	8
6624	181	PREDICTED: d-3-phosphoglycerate dehydrogenase, chloroplastic-like [Vitis vinifera]	gi|225443272	66269	0.127	YVGVSLVGK	42.3	41	9.44		461.274	920.533	921.54	2	0.0001581	0.1715	214	222	8
6624	181	PREDICTED: leucine aminopeptidase 2, chloroplastic isoform 1 [Vitis vinifera]	gi|225445867,gi|297743644	60726.3	0.139	EVLAASEASGEK	66.8	44.3	10.3		595.798	1189.58	1190.59	2	-0.001062	-0.8919	490	501	5
6624	181	PREDICTED: leucine aminopeptidase 2, chloroplastic isoform 1 [Vitis vinifera]	gi|225445867,gi|297743644	60726.3	0.139	FDMGGSAAVLGAAK	62.6	45	0		647.826	1293.64	1294.65	2	-0.002522	-1.948	376	389	5
6624	181	PREDICTED: leucine aminopeptidase 2, chloroplastic isoform 1 [Vitis vinifera]	gi|225445867,gi|297743644	60726.3	0.139	GDILAVGVTEK	40	44.6	6.5		551.31	1100.61	1101.62	2	-0.002142	-1.944	92	102	5
6624	181	PREDICTED: leucine aminopeptidase 2, chloroplastic isoform 1 [Vitis vinifera]	gi|225445867,gi|297743644	60726.3	0.139	SLGETVAVAAK	33.6	45.6	5.31		523.298	1044.58	1045.59	2	0.0008181	0.7824	176	186	5
6624	181	PREDICTED: leucine aminopeptidase 2, chloroplastic isoform 1 [Vitis vinifera]	gi|225445867,gi|297743644	60726.3	0.139	YAEDVcSGVIFGK	70.6	42.2	12.4	c6: Carbamidomethyl (+57.02)	722.839	1443.66	1444.68	2	-0.006427	-4.449	258	270	5
6624	181	pyruvate decarboxylase 1 [Vitis vinifera]	gi|10732644,gi|225439520	62254.3	0.0313	AILVQPER	33.9	40.1	3.69		463.276	924.538	925.547	2	-0.001702	-1.839	316	323	2
6624	181	pyruvate decarboxylase 1 [Vitis vinifera]	gi|10732644,gi|225439520	62254.3	0.0313	IYVPEGQPLR	53.5	45	6.71		586.327	1170.64	1171.65	2	-0.0002819	-0.2406	361	370	2
6624	181	RecName: Full=Ribulose bisphosphate carboxylase large chain; Short=RuBisCO large subunit; Flags: Precursor	gi|115311623,gi|147769051,gi|46275228	52501.5	0.0484	FLFcAEAIFK	43.2	44.6	7.39	c4: Carbamidomethyl (+57.02)	623.317	1244.62	1245.63	2	-0.006167	-4.951	218	227	2
6624	181	RecName: Full=Ribulose bisphosphate carboxylase large chain; Short=RuBisCO large subunit; Flags: Precursor	gi|115311623,gi|147769051,gi|46275228	52501.5	0.0484	TFQGPPHGIQVER	42.1	45.6	9.91		489.257	1464.75	1465.75	3	0.0007921	0.5404	147	159	2
6624	181	PREDICTED: 2,3-bisphosphoglycerate-independent phosphoglycerate mutase isoform 1 [Vitis vinifera]	gi|225439064,gi|239056191	61074.9	0.245	AVEIAEK	36	44.9	-0.763		380.215	758.416	759.425	2	-0.001182	-1.556	403	409	13
6624	181	PREDICTED: 2,3-bisphosphoglycerate-independent phosphoglycerate mutase isoform 1 [Vitis vinifera]	gi|225439064,gi|239056191	61074.9	0.245	GVDAQIASGGGR	62.4	43.8	9.62		544.279	1086.54	1087.55	2	0.0004181	0.3844	195	206	13
6624	181	PREDICTED: 2,3-bisphosphoglycerate-independent phosphoglycerate mutase isoform 1 [Vitis vinifera]	gi|225439064,gi|239056191	61074.9	0.245	GWDAQVLGEAPHK	84.4	45	13.9		704.36	1406.7	1407.7	2	0.01006	7.145	224	236	13
6624	181	PREDICTED: 2,3-bisphosphoglycerate-independent phosphoglycerate mutase isoform 1 [Vitis vinifera]	gi|225439064,gi|239056191	61074.9	0.245	IYEGEGFK	32	41.9	5.08		471.733	941.452	942.457	2	0.002838	3.011	110	117	13
6624	181	PREDICTED: 2,3-bisphosphoglycerate-independent phosphoglycerate mutase isoform 1 [Vitis vinifera]	gi|225439064,gi|239056191	61074.9	0.245	LPNHYLVSPPEIER	55.8	45.4	11.1		555.298	1662.87	1663.88	3	-0.001318	-0.7921	327	340	13
6624	181	PREDICTED: 2,3-bisphosphoglycerate-independent phosphoglycerate mutase isoform 1 [Vitis vinifera]	gi|225439064,gi|239056191	61074.9	0.245	MVMIAK	34.7	45.4	0		346.695	691.375	692.383	2	-0.001442	-2.083	290	295	13
6624	181	PREDICTED: 2,3-bisphosphoglycerate-independent phosphoglycerate mutase isoform 1 [Vitis vinifera]	gi|225439064,gi|239056191	61074.9	0.245	MYVTMDR	22.6	37.4	0		458.206	914.398	915.406	2	-0.001102	-1.204	207	213	13
6624	181	PREDICTED: 2,3-bisphosphoglycerate-independent phosphoglycerate mutase isoform 1 [Vitis vinifera]	gi|225439064,gi|239056191	61074.9	0.245	SLEYEDFDKFDR	69.7	40.8	11.9		782.354	1562.69	1563.7	2	0.004098	2.621	296	307	13
6624	181	PREDICTED: 2,3-bisphosphoglycerate-independent phosphoglycerate mutase isoform 1 [Vitis vinifera]	gi|225439064,gi|239056191	61074.9	0.245	TFAcSETVK	36.2	41.6	6.92	c4: Carbamidomethyl (+57.02)	521.747	1041.48	1042.49	2	-0.0006672	-0.64	353	361	13
6624	181	PREDICTED: 2,3-bisphosphoglycerate-independent phosphoglycerate mutase isoform 1 [Vitis vinifera]	gi|225439064,gi|239056191	61074.9	0.245	TSGEYLVHNGVR	38.5	44.5	4.65		444.559	1330.66	1331.67	3	-0.006658	-5	341	352	13
6624	181	PREDICTED: 2,3-bisphosphoglycerate-independent phosphoglycerate mutase isoform 1 [Vitis vinifera]	gi|225439064,gi|239056191	61074.9	0.245	VHILTDGR	38.1	42.8	7.12		455.757	909.5	910.511	2	-0.002982	-3.275	163	170	13
6624	181	PREDICTED: 2,3-bisphosphoglycerate-independent phosphoglycerate mutase isoform 1 [Vitis vinifera]	gi|225439064,gi|239056191	61074.9	0.245	YENDWEVVK	46.1	42.1	10.5		591.276	1180.54	1181.55	2	-0.002422	-2.05	214	222	13
6624	181	PREDICTED: 2,3-bisphosphoglycerate-independent phosphoglycerate mutase isoform 1 [Vitis vinifera]	gi|225439064,gi|239056191	61074.9	0.245	YENDWEVVKR	47.5	44.6	3.94		446.557	1336.65	1337.65	3	0.006862	5.13	214	223	13
6624	181	RecName: Full=S-adenosylmethionine synthase 2; Short=AdoMet synthase 2; AltName: Full=Methionine adenosyltransferase 2; Short=MAT 2	gi|223635284	43095.8	0.252	EHVIKPVIPEK	18.5	40.7	5.26		430.258	1287.75	1288.76	3	-0.002318	-1.799	212	222	6
6624	181	RecName: Full=S-adenosylmethionine synthase 2; Short=AdoMet synthase 2; AltName: Full=Methionine adenosyltransferase 2; Short=MAT 2	gi|223635284	43095.8	0.252	FVIGGPHGDAGLTGR	31.3	44.7	8.54		485.257	1452.75	1453.75	3	0.0005121	0.3522	238	252	6
6624	181	RecName: Full=S-adenosylmethionine synthase 2; Short=AdoMet synthase 2; AltName: Full=Methionine adenosyltransferase 2; Short=MAT 2	gi|223635284	43095.8	0.252	TNMVMVFGEITTK	45	44.4	0		490.918	1469.73	1470.73	3	0.007552	5.135	48	60	6
6624	181	RecName: Full=S-adenosylmethionine synthase 2; Short=AdoMet synthase 2; AltName: Full=Methionine adenosyltransferase 2; Short=MAT 2	gi|223635284	43095.8	0.252	TQVTVEYHNDGGAR	60.2	42.9	10.7		516.247	1545.72	1546.72	3	0.002082	1.346	170	183	6
6624	181	RecName: Full=S-adenosylmethionine synthase 2; Short=AdoMet synthase 2; AltName: Full=Methionine adenosyltransferase 2; Short=MAT 2	gi|223635284	43095.8	0.252	VHTVLISTQHDETVTNDEIAADLK	121	45.2	15.1		883.783	2648.33	2649.34	3	-0.003698	-1.396	188	211	6
6624	181	RecName: Full=S-adenosylmethionine synthase 2; Short=AdoMet synthase 2; AltName: Full=Methionine adenosyltransferase 2; Short=MAT 2	gi|223635284	43095.8	0.252	VLVNIEQQSPDIAQGVHGHLTK	48.9	44.1	8.9		795.091	2382.25	2383.27	3	-0.01407	-5.903	92	113	6
6624	181	PREDICTED: succinate dehydrogenase [ubiquinone] flavoprotein subunit 1, mitochondrial isoform 1 [Vitis vinifera]	gi|225430776	73642.3	0.388	AAIGELSK	42.6	47.4	1.36		394.732	787.45	788.451	2	0.005778	7.328	52	59	21
6624	181	PREDICTED: succinate dehydrogenase [ubiquinone] flavoprotein subunit 1, mitochondrial isoform 1 [Vitis vinifera]	gi|225430776	73642.3	0.388	AAIGLSEHGFNTAcITK	67.3	45.3	9.76	c14: Carbamidomethyl (+57.02)	597.301	1788.88	1789.89	3	-0.003483	-1.946	100	116	21
6624	181	PREDICTED: succinate dehydrogenase [ubiquinone] flavoprotein subunit 1, mitochondrial isoform 1 [Vitis vinifera]	gi|225430776	73642.3	0.388	AFGGQSLNFGK	63	44.1	9.56		563.289	1124.56	1125.57	2	0.002298	2.042	196	206	21
6624	181	PREDICTED: succinate dehydrogenase [ubiquinone] flavoprotein subunit 1, mitochondrial isoform 1 [Vitis vinifera]	gi|225430776	73642.3	0.388	AGLPLQDLEFVQFHPTGIYGAGcLITEGSR	20.9	44.6	8.07	c23: Carbamidomethyl (+57.02)	1082.89	3245.64	3246.63	3	0.02554	7.866	308	337	21
6624	181	PREDICTED: succinate dehydrogenase [ubiquinone] flavoprotein subunit 1, mitochondrial isoform 1 [Vitis vinifera]	gi|225430776	73642.3	0.388	AWESFHDVQLK	36.5	44.9	9.36		680.341	1358.67	1359.67	2	0.005038	3.705	568	578	21
6624	181	PREDICTED: succinate dehydrogenase [ubiquinone] flavoprotein subunit 1, mitochondrial isoform 1 [Vitis vinifera]	gi|225430776	73642.3	0.388	DDENWIR	47	39.7	5.27		474.216	946.417	947.422	2	0.002138	2.257	627	633	21
6624	181	PREDICTED: succinate dehydrogenase [ubiquinone] flavoprotein subunit 1, mitochondrial isoform 1 [Vitis vinifera]	gi|225430776	73642.3	0.388	EDFTKR	32.1	43.7	0.048		398.203	794.391	795.4	2	-0.001702	-2.14	621	626	21
6624	181	PREDICTED: succinate dehydrogenase [ubiquinone] flavoprotein subunit 1, mitochondrial isoform 1 [Vitis vinifera]	gi|225430776	73642.3	0.388	FQAASTILATGGYGR	77.4	44.5	13.1		756.894	1511.77	1512.78	2	-0.0007019	-0.464	272	286	21
6624	181	PREDICTED: succinate dehydrogenase [ubiquinone] flavoprotein subunit 1, mitochondrial isoform 1 [Vitis vinifera]	gi|225430776	73642.3	0.388	GEGGILR	67.2	44.3	3.27		351.201	700.388	701.394	2	0.0009381	1.337	338	344	21
6624	181	PREDICTED: succinate dehydrogenase [ubiquinone] flavoprotein subunit 1, mitochondrial isoform 1 [Vitis vinifera]	gi|225430776	73642.3	0.388	GNDPDAVVPGLMAAGEAAcASVHGANR	143	43.8	0	c19: Carbamidomethyl (+57.02)	869.745	2606.21	2607.2	3	0.01758	6.742	451	477	21
6624	181	PREDICTED: succinate dehydrogenase [ubiquinone] flavoprotein subunit 1, mitochondrial isoform 1 [Vitis vinifera]	gi|225430776	73642.3	0.388	GSDWLGDQDAIQYmcR	27.5	36.5	9.15	m14: Oxidation (+15.99), c15: Carbamidomethyl (+57.02)	644.274	1929.8	1930.81	3	0.002402	1.244	153	168	21
6624	181	PREDICTED: succinate dehydrogenase [ubiquinone] flavoprotein subunit 1, mitochondrial isoform 1 [Vitis vinifera]	gi|225430776	73642.3	0.388	HGVDTAGITELYR	62.9	44.8	9.27		477.912	1430.71	1431.72	3	-0.0007979	-0.5573	60	72	21
6624	181	PREDICTED: succinate dehydrogenase [ubiquinone] flavoprotein subunit 1, mitochondrial isoform 1 [Vitis vinifera]	gi|225430776	73642.3	0.388	HTLGYWENEK	50.2	42.4	13		638.801	1275.59	1276.6	2	-0.001002	-0.7849	634	643	21
6624	181	PREDICTED: succinate dehydrogenase [ubiquinone] flavoprotein subunit 1, mitochondrial isoform 1 [Vitis vinifera]	gi|225430776	73642.3	0.388	LGANSLLDIVVFGR	98.4	41.9	11.2		737.427	1472.84	1473.84	2	0.004518	3.065	478	491	21
6624	181	PREDICTED: succinate dehydrogenase [ubiquinone] flavoprotein subunit 1, mitochondrial isoform 1 [Vitis vinifera]	gi|225430776	73642.3	0.388	NSNGSIPTSK	71.8	44.4	10.4		502.752	1003.49	1004.5	2	-0.003522	-3.506	527	536	21
6624	181	PREDICTED: succinate dehydrogenase [ubiquinone] flavoprotein subunit 1, mitochondrial isoform 1 [Vitis vinifera]	gi|225430776	73642.3	0.388	RDDENWIR	38	42.5	8.02		552.265	1102.51	1103.52	2	-0.0009219	-0.8355	626	633	21
6624	181	PREDICTED: succinate dehydrogenase [ubiquinone] flavoprotein subunit 1, mitochondrial isoform 1 [Vitis vinifera]	gi|225430776	73642.3	0.388	SMTMEIR	49.1	41.6	0		434.207	866.399	867.406	2	0.0001381	0.1592	371	377	21
6624	181	PREDICTED: succinate dehydrogenase [ubiquinone] flavoprotein subunit 1, mitochondrial isoform 1 [Vitis vinifera]	gi|225430776	73642.3	0.388	TQETLEEGcK	51.6	40	9.49	c9: Carbamidomethyl (+57.02)	597.769	1193.52	1194.53	2	-0.001147	-0.9604	554	563	21
6624	181	PREDICTED: succinate dehydrogenase [ubiquinone] flavoprotein subunit 1, mitochondrial isoform 1 [Vitis vinifera]	gi|225430776	73642.3	0.388	TYFSATSAHTcTGDGNAMVAR	83.8	40.2	0	c11: Carbamidomethyl (+57.02)	739.998	2216.97	2217.97	3	0.0146	6.581	287	307	21
6624	181	PREDICTED: succinate dehydrogenase [ubiquinone] flavoprotein subunit 1, mitochondrial isoform 1 [Vitis vinifera]	gi|225430776	73642.3	0.388	VAEIHKPGEK	55	43.8	8.58		554.313	1106.61	1107.62	2	0.002058	1.858	497	506	21
6624	181	PREDICTED: succinate dehydrogenase [ubiquinone] flavoprotein subunit 1, mitochondrial isoform 1 [Vitis vinifera]	gi|225430776	73642.3	0.388	VMQNNAAVFR	67.3	45.6	0		575.297	1148.58	1149.58	2	0.002678	2.33	544	553	21
6624	181	hypothetical protein VITISV_016119 [Vitis vinifera]	gi|147860393,gi|225436253	66883.4	0.242	AYLEFFcSR	35	41.9	9.24	c7: Carbamidomethyl (+57.02)	596.778	1191.54	1192.55	2	0.002493	2.09	468	476	13
6624	181	hypothetical protein VITISV_016119 [Vitis vinifera]	gi|147860393,gi|225436253	66883.4	0.242	DEAFEIWSR	41.9	43.1	10.9		576.774	1151.53	1152.53	2	0.008298	7.2	541	549	13
6624	181	hypothetical protein VITISV_016119 [Vitis vinifera]	gi|147860393,gi|225436253	66883.4	0.242	FVNDcR	27.3	39.4	0.363	c5: Carbamidomethyl (+57.02)	405.68	809.346	810.356	2	-0.003327	-4.106	204	209	13
6624	181	hypothetical protein VITISV_016119 [Vitis vinifera]	gi|147860393,gi|225436253	66883.4	0.242	IDHALDTIK	27.4	41.9	9.78		513.285	1024.55	1025.56	2	-0.0008019	-0.782	93	101	13
6624	181	hypothetical protein VITISV_016119 [Vitis vinifera]	gi|147860393,gi|225436253	66883.4	0.242	ILAHGIK	33.8	32.9	1.5		376.245	750.475	751.483	2	-0.0005819	-0.7744	274	280	13
6624	181	hypothetical protein VITISV_016119 [Vitis vinifera]	gi|147860393,gi|225436253	66883.4	0.242	IPSEVTAALEPIKDNDEAVK	21.8	44.7	8.53		713.711	2138.11	2139.12	3	0.001492	0.6975	241	260	13
6624	181	hypothetical protein VITISV_016119 [Vitis vinifera]	gi|147860393,gi|225436253	66883.4	0.242	IRDAATEEGK	28.3	44.8	4.72		545.28	1088.55	1089.55	2	-4.194e-05	-0.03849	7	16	13
6624	181	hypothetical protein VITISV_016119 [Vitis vinifera]	gi|147860393,gi|225436253	66883.4	0.242	LNALVDK	36.5	44.8	2.53		386.731	771.447	772.456	2	-0.002702	-3.498	479	485	13
6624	181	hypothetical protein VITISV_016119 [Vitis vinifera]	gi|147860393,gi|225436253	66883.4	0.242	MTGFcK	30.8	34.2	0	c5: Carbamidomethyl (+57.02)	372.164	742.314	743.322	2	-0.0002472	-0.3326	233	238	13
6624	181	hypothetical protein VITISV_016119 [Vitis vinifera]	gi|147860393,gi|225436253	66883.4	0.242	SIEDVQER	48	42.6	3.9		488.241	974.468	975.474	2	0.001118	1.146	390	397	13
6624	181	hypothetical protein VITISV_016119 [Vitis vinifera]	gi|147860393,gi|225436253	66883.4	0.242	SSPWSELDGLQPESK	17.5	43.9	7.75		830.403	1658.79	1659.79	2	0.01204	7.253	408	422	13
6624	181	hypothetical protein VITISV_016119 [Vitis vinifera]	gi|147860393,gi|225436253	66883.4	0.242	SYISR	23.7	37.9	0		313.169	624.324	625.33	2	0.0009381	1.5	338	342	13
6624	181	hypothetical protein VITISV_016119 [Vitis vinifera]	gi|147860393,gi|225436253	66883.4	0.242	VVFSFEFFPPK	52.4	45	10.1		672.353	1342.69	1343.7	2	-0.004702	-3.499	17	27	13
6624	181	hypothetical protein VITISV_039323 [Vitis vinifera]	gi|147787244	60356.2	0.0858	ELEDTVR	37.6	44.7	1.64		431.22	860.424	861.431	2	0.0004781	0.555	321	327	5
6624	181	hypothetical protein VITISV_039323 [Vitis vinifera]	gi|147787244	60356.2	0.0858	GYLNDPEATER	42.5	42.5	8.27		632.796	1263.58	1264.58	2	0.004918	3.889	404	414	5
6624	181	hypothetical protein VITISV_039323 [Vitis vinifera]	gi|147787244	60356.2	0.0858	LIITQAcYSGK	52	44.4	10	c7: Carbamidomethyl (+57.02)	627.333	1252.65	1253.66	2	0.003733	2.977	133	143	5
6624	181	hypothetical protein VITISV_039323 [Vitis vinifera]	gi|147787244	60356.2	0.0858	NQPGEIcIR	32.1	42.2	4.49	c7: Carbamidomethyl (+57.02)	543.768	1085.52	1086.54	2	-0.006767	-6.228	389	397	5
6624	181	hypothetical protein VITISV_039323 [Vitis vinifera]	gi|147787244	60356.2	0.0858	VFFVETIPK	13.9	40.7	4.46		540.314	1078.61	1079.61	2	0.007418	6.871	519	527	5
6624	181	hypothetical protein VITISV_036580 [Vitis vinifera]	gi|147823108	64978.2	0.136	GGVIDEDALVR	63.8	44	8.53		572.301	1142.59	1143.6	2	-0.005702	-4.986	299	309	8
6624	181	hypothetical protein VITISV_036580 [Vitis vinifera]	gi|147823108	64978.2	0.136	IFNDETFAK	13.6	43.7	4.35		542.772	1083.53	1084.53	2	0.005998	5.531	278	286	8
6624	181	hypothetical protein VITISV_036580 [Vitis vinifera]	gi|147823108	64978.2	0.136	ISLcDALIVR	57.4	45.2	11.1	c4: Carbamidomethyl (+57.02)	580.333	1158.65	1159.65	2	0.007733	6.668	120	129	8
6624	181	hypothetical protein VITISV_036580 [Vitis vinifera]	gi|147823108	64978.2	0.136	LAVQLVAGGSGIK	61.4	40.9	11.7		606.867	1211.72	1212.73	2	-0.005042	-4.158	405	417	8
6624	181	hypothetical protein VITISV_036580 [Vitis vinifera]	gi|147823108	64978.2	0.136	QVDQPGmIGR	36.3	43	4.66	m7: Oxidation (+15.99)	558.777	1115.54	1116.55	2	-0.001037	-0.9287	543	552	8
6624	181	hypothetical protein VITISV_036580 [Vitis vinifera]	gi|147823108	64978.2	0.136	QVQKPTVLVSEK	37.9	42.2	6.31		452.601	1354.78	1355.79	3	-0.0003079	-0.2271	79	90	8
6624	181	hypothetical protein VITISV_036580 [Vitis vinifera]	gi|147823108	64978.2	0.136	TLAVmGFGK	32.5	44	6.03	m5: Oxidation (+15.99)	470.251	938.488	939.497	2	-0.001617	-1.721	209	217	8
6624	181	hypothetical protein VITISV_036580 [Vitis vinifera]	gi|147823108	64978.2	0.136	YVGVSLVGK	42.3	41	9.44		461.274	920.533	921.54	2	0.0001581	0.1715	200	208	8
6624	181	ATPase subunit 1 [Vitis vinifera]	gi|224365668	55126.8	0.0609	AVDSLVPIGR	26.7	41.5	5.45		513.802	1025.59	1026.59	2	0.001738	1.693	154	163	2
6624	181	ATPase subunit 1 [Vitis vinifera]	gi|224365668	55126.8	0.0609	ITNFYTNLK	45.5	43.2	8.26		557.299	1112.58	1113.59	2	-0.002802	-2.516	18	26	2
6624	181	PREDICTED: enolase 1 [Vitis vinifera]	gi|225441000	47856.4	0.126	SGETEDTFIADLSVGLATGQIK	73.9	45.6	12.9		751.378	2251.11	2252.13	3	-0.009928	-4.408	382	403	3
6624	181	PREDICTED: enolase 1 [Vitis vinifera]	gi|225441000	47856.4	0.126	VQIVGDDLLVTNPK	59.7	41.8	11.5		755.932	1509.85	1510.85	2	0.008358	5.532	322	335	3
6624	181	PREDICTED: enolase 1 [Vitis vinifera]	gi|225441000	47856.4	0.126	VSAAVPSGASTGIYEALELR	67.5	44.9	12.1		996.031	1990.05	1991.04	2	0.01088	5.463	33	52	3
6624	181	PREDICTED: phosphoglucomutase, cytoplasmic [Vitis vinifera]	gi|225424316	63624.8	0.266	ADEFEYKDPVDGSISK	79.3	42.3	11.3		600.613	1798.82	1799.83	3	-0.009228	-5.127	492	507	13
6624	181	PREDICTED: phosphoglucomutase, cytoplasmic [Vitis vinifera]	gi|225424316	63624.8	0.266	DSQEALGPLVEVALK	52.3	43.6	11.8		784.932	1567.85	1568.85	2	0.004358	2.778	552	566	13
6624	181	PREDICTED: phosphoglucomutase, cytoplasmic [Vitis vinifera]	gi|225424316	63624.8	0.266	EDFGGGHPDPNLTYAK	38.2	41.4	9.51		573.264	1716.77	1717.78	3	-0.004438	-2.584	260	275	13
6624	181	PREDICTED: phosphoglucomutase, cytoplasmic [Vitis vinifera]	gi|225424316	63624.8	0.266	ELVAcmGLGK	32.8	44.4	6.05	c5: Carbamidomethyl (+57.02), m6: Oxidation (+15.99)	547.272	1092.53	1093.54	2	-0.001062	-0.9714	276	285	13
6624	181	PREDICTED: phosphoglucomutase, cytoplasmic [Vitis vinifera]	gi|225424316	63624.8	0.266	FFEVPTGWK	46.1	43.8	9.6		555.787	1109.56	1110.56	2	0.005318	4.789	363	371	13
6624	181	PREDICTED: phosphoglucomutase, cytoplasmic [Vitis vinifera]	gi|225424316	63624.8	0.266	GmTLVVSGDGR	38.9	44.6	7.38	m2: Oxidation (+15.99)	554.277	1106.54	1107.55	2	0.001023	0.9237	55	65	13
6624	181	PREDICTED: phosphoglucomutase, cytoplasmic [Vitis vinifera]	gi|225424316	63624.8	0.266	LLSSPK	41.8	44.3	0		322.704	643.393	644.398	2	0.002838	4.404	217	222	13
6624	181	PREDICTED: phosphoglucomutase, cytoplasmic [Vitis vinifera]	gi|225424316	63624.8	0.266	LQSSLPEVNK	46.3	43.7	9.15		557.808	1113.6	1114.61	2	-0.0005419	-0.4862	468	477	13
6624	181	PREDICTED: phosphoglucomutase, cytoplasmic [Vitis vinifera]	gi|225424316	63624.8	0.266	LSGTGSEGATIR	61.1	44.9	7.55		574.797	1147.58	1148.59	2	-0.004382	-3.815	525	536	13
6624	181	PREDICTED: phosphoglucomutase, cytoplasmic [Vitis vinifera]	gi|225424316	63624.8	0.266	mQEFTGR	24.6	39.6	3.6	m1: Oxidation (+15.99)	442.7	883.386	884.393	2	0.000103	0.1165	570	576	13
6624	181	PREDICTED: phosphoglucomutase, cytoplasmic [Vitis vinifera]	gi|225424316	63624.8	0.266	SIFDFQSIQK	34.7	44.1	6.9		606.82	1211.63	1212.63	2	0.006358	5.243	207	216	13
6624	181	PREDICTED: phosphoglucomutase, cytoplasmic [Vitis vinifera]	gi|225424316	63624.8	0.266	SMPTSAALDVVAK	66.9	45.6	0		645.339	1288.66	1289.68	2	-0.005902	-4.576	345	357	13
6624	181	PREDICTED: phosphoglucomutase, cytoplasmic [Vitis vinifera]	gi|225424316	63624.8	0.266	VYIEQYEK	37	42.8	5.8		536.273	1070.53	1071.54	2	0.001898	1.771	537	544	13
2327	182	unnamed protein product [Vitis vinifera]	gi|297740500,gi|359483716	32365.3	0.451	AYQTASTTAEADLSPTHPIR	105	45.2	9.97		710.691	2129.05	2130.05	3	0.01045	4.907	154	173	6
2327	182	unnamed protein product [Vitis vinifera]	gi|297740500,gi|359483716	32365.3	0.451	DNLTLWTTDIPGDDEESWK	32.6	42	10.2		745.678	2234.01	2235.01	3	0.01005	4.498	229	247	6
2327	182	unnamed protein product [Vitis vinifera]	gi|297740500,gi|359483716	32365.3	0.451	DRDTFVYVAK	23.8	44	7.85		607.316	1212.62	1213.62	2	0.002538	2.091	6	15	6
2327	182	unnamed protein product [Vitis vinifera]	gi|297740500,gi|359483716	32365.3	0.451	DSTLImQLLR	48.7	44.7	5.17	m6: Oxidation (+15.99)	603.335	1204.65	1205.66	2	0.005823	4.83	219	228	6
2327	182	unnamed protein product [Vitis vinifera]	gi|297740500,gi|359483716	32365.3	0.451	GDYYR	25.2	35.6	0.182		337.15	672.286	673.294	2	-0.001202	-1.785	129	133	6
2327	182	unnamed protein product [Vitis vinifera]	gi|297740500,gi|359483716	32365.3	0.451	IKEYR	28.8	43.7	0		354.704	707.393	708.404	2	-0.003322	-4.689	85	89	6
2327	182	unnamed protein product [Vitis vinifera]	gi|297740500,gi|359483716	32365.3	0.451	ILSSIEQK	44	44.5	5.05		459.27	916.525	917.53	2	0.001778	1.938	65	72	6
2327	182	unnamed protein product [Vitis vinifera]	gi|297740500,gi|359483716	32365.3	0.451	LAEQAER	38	43.3	3.67		408.712	815.409	816.421	2	-0.005122	-6.274	16	22	6
2327	182	unnamed protein product [Vitis vinifera]	gi|297740500,gi|359483716	32365.3	0.451	mKGDYYR	33.9	39.6	1.88	m1: Oxidation (+15.99)	474.716	947.418	948.424	2	0.000743	0.7835	127	133	6
2327	182	unnamed protein product [Vitis vinifera]	gi|297740500,gi|359483716	32365.3	0.451	NLLSVGFK	46	41.4	4.5		439.262	876.509	877.514	2	0.002318	2.642	46	53	6
2327	182	unnamed protein product [Vitis vinifera]	gi|297740500,gi|359483716	32365.3	0.451	YDEMVDSMK	51.4	33	0		559.23	1116.44	1117.45	2	-0.002422	-2.167	23	31	6
2327	182	unnamed protein product [Vitis vinifera]	gi|297740500,gi|359483716	32365.3	0.451	YDEmVDSmKK	14.1	36.9	5.04	m4: Oxidation (+15.99), m8: Oxidation (+15.99)	426.518	1276.53	1277.54	3	-0.000218	-0.1706	23	32	6
2327	182	unnamed protein product [Vitis vinifera]	gi|297740500,gi|359483716	32365.3	0.451	YLAEFK	32.3	38.9	1.68		385.707	769.4	770.408	2	-0.0008819	-1.145	134	139	6
2327	182	PREDICTED: ran-binding protein 1 homolog c [Vitis vinifera]	gi|225439378	24292.7	0.376	EEEDAPAGEDEDTGAQVAPIVK	51.1	42.1	10.3		757.348	2269.02	2270.03	3	-0.001628	-0.7171	10	31	9
2327	182	PREDICTED: ran-binding protein 1 homolog c [Vitis vinifera]	gi|225439378	24292.7	0.376	EESEDASAAAGLLEK	91.3	43.7	12.3		760.364	1518.71	1519.71	2	0.008138	5.355	162	176	9
2327	182	PREDICTED: ran-binding protein 1 homolog c [Vitis vinifera]	gi|225439378	24292.7	0.376	FASVENcK	65.7	41	6.33	c7: Carbamidomethyl (+57.02)	477.722	953.429	954.435	2	0.001173	1.229	138	145	9
2327	182	PREDICTED: ran-binding protein 1 homolog c [Vitis vinifera]	gi|225439378	24292.7	0.376	GQEEGSLATK	30.1	44.3	5.37		510.253	1018.49	1019.5	2	-0.001082	-1.061	188	197	9
2327	182	PREDICTED: ran-binding protein 1 homolog c [Vitis vinifera]	gi|225439378	24292.7	0.376	KEESEDASAAAGLLEK	89	44.9	10.4		824.408	1646.8	1647.81	2	0.001038	0.63	161	176	9
2327	182	PREDICTED: ran-binding protein 1 homolog c [Vitis vinifera]	gi|225439378	24292.7	0.376	LSVGDSK	37.9	44.7	1.48		353.194	704.374	705.378	2	0.003518	4.987	177	183	9
2327	182	PREDICTED: ran-binding protein 1 homolog c [Vitis vinifera]	gi|225439378	24292.7	0.376	REEEDAPAGEDEDTGAQVAPIVK	80.3	43.6	12.2		809.382	2425.13	2426.13	3	0.0005621	0.2317	9	31	9
2327	182	PREDICTED: ran-binding protein 1 homolog c [Vitis vinifera]	gi|225439378	24292.7	0.376	TEDKGQEEGSLATK	90.4	44	12.4		746.861	1491.71	1492.71	2	0.002358	1.58	184	197	9
2327	182	PREDICTED: ran-binding protein 1 homolog c [Vitis vinifera]	gi|225439378	24292.7	0.376	TFMEMFQEVAESQGK	72.4	40.8	0		881.399	1760.78	1761.78	2	0.008398	4.767	146	160	9
2327	182	PREDICTED: 14-3-3 protein 4 [Vitis vinifera]	gi|225451995	29523.7	0.508	ATIEAELSK	40.3	46.2	7.73		481.26	960.505	961.52	2	-0.008062	-8.385	93	101	6
2327	182	PREDICTED: 14-3-3 protein 4 [Vitis vinifera]	gi|225451995	29523.7	0.508	DSTLImQLLR	48.7	44.7	5.17	m6: Oxidation (+15.99)	603.335	1204.65	1205.66	2	0.005823	4.83	222	231	6
2327	182	PREDICTED: 14-3-3 protein 4 [Vitis vinifera]	gi|225451995	29523.7	0.508	EAAESTLLAYK	68.2	43.8	12		598.317	1194.62	1195.62	2	0.005578	4.665	149	159	6
2327	182	PREDICTED: 14-3-3 protein 4 [Vitis vinifera]	gi|225451995	29523.7	0.508	EENVYmAK	29.9	39	4.72	m6: Oxidation (+15.99)	500.227	998.439	999.445	2	0.000703	0.7034	9	16	6
2327	182	PREDICTED: 14-3-3 protein 4 [Vitis vinifera]	gi|225451995	29523.7	0.508	GNEDHVAIIK	32	44	9.72		548.291	1094.57	1095.58	2	-0.004602	-4.2	80	89	6
2327	182	PREDICTED: 14-3-3 protein 4 [Vitis vinifera]	gi|225451995	29523.7	0.508	IISSIEQK	44	44.5	5.05		459.27	916.525	917.53	2	0.001778	1.938	68	75	6
2327	182	PREDICTED: 14-3-3 protein 4 [Vitis vinifera]	gi|225451995	29523.7	0.508	LAEQAER	38	43.3	3.67		408.712	815.409	816.421	2	-0.005122	-6.274	17	23	6
2327	182	PREDICTED: 14-3-3 protein 4 [Vitis vinifera]	gi|225451995	29523.7	0.508	MLLTESSR	47.6	45	0		468.745	935.476	936.482	2	0.001198	1.279	1	8	6
2327	182	PREDICTED: 14-3-3 protein 4 [Vitis vinifera]	gi|225451995	29523.7	0.508	NLLSVAYK	26.7	41.2	3.72		454.266	906.518	907.525	2	0.0006781	0.7472	49	56	6
2327	182	PREDICTED: 14-3-3 protein 4 [Vitis vinifera]	gi|225451995	29523.7	0.508	SAQDIALAELAPTHPIR	59.3	44.1	8.69		601.666	1801.98	1802.98	3	0.007002	3.884	160	176	6
2327	182	PREDICTED: 14-3-3 protein 4 [Vitis vinifera]	gi|225451995	29523.7	0.508	TVEVEELTVEER	62.9	44.9	12.1		716.86	1431.71	1432.72	2	-0.003382	-2.361	37	48	6
2327	182	PREDICTED: 14-3-3 protein 4 [Vitis vinifera]	gi|225451995	29523.7	0.508	YLAEFK	32.3	38.9	1.68		385.707	769.4	770.408	2	-0.0008819	-1.145	137	142	6
2327	182	PREDICTED: unknown protein DS12 from 2D-PAGE of leaf, chloroplastic-like [Vitis vinifera]	gi|359483143	31413.6	0.134	ANVFLDSSGK	45.7	44.5	9.59		519.266	1036.52	1037.53	2	-0.001242	-1.197	128	137	3
2327	182	PREDICTED: unknown protein DS12 from 2D-PAGE of leaf, chloroplastic-like [Vitis vinifera]	gi|359483143	31413.6	0.134	KVEDPELLEAIR	33.3	43.4	10.9		471.264	1410.77	1411.78	3	-0.0004879	-0.3456	151	162	3
2327	182	PREDICTED: unknown protein DS12 from 2D-PAGE of leaf, chloroplastic-like [Vitis vinifera]	gi|359483143	31413.6	0.134	RPSTEEASF	30.3	42.6	1.47		512.24	1022.47	1023.47	2	-0.001262	-1.233	283	291	3
2327	182	PREDICTED: ruBisCO large subunit-binding protein subunit alpha, chloroplastic-like [Vitis vinifera]	gi|359479362	61967	0.0683	DSTTIIADAASKDEIQAR	27.6	45.4	8.14		635.655	1903.94	1904.96	3	-0.005588	-2.933	372	389	2
2327	182	PREDICTED: ruBisCO large subunit-binding protein subunit alpha, chloroplastic-like [Vitis vinifera]	gi|359479362	61967	0.0683	SPLLIVAEDVTGEALATLVVNK	96.7	39.1	12.9		751.431	2251.27	2252.28	3	0.002532	1.124	289	310	2
2327	182	unnamed protein product [Vitis vinifera]	gi|297745219	32742.6	0.318	AALNAYTR	62.2	44.3	5.12		440.238	878.461	879.468	2	-0.0002019	-0.2296	232	239	10
2327	182	unnamed protein product [Vitis vinifera]	gi|297745219	32742.6	0.318	AVLSDAENLTEER	73.1	44.4	13		723.859	1445.7	1446.71	2	0.002938	2.031	186	198	10
2327	182	unnamed protein product [Vitis vinifera]	gi|297745219	32742.6	0.318	GmGLEIcR	40.6	41.5	5.67	m2: Oxidation (+15.99), c7: Carbamidomethyl (+57.02)	476.221	950.427	951.439	2	-0.004882	-5.131	22	29	10
2327	182	unnamed protein product [Vitis vinifera]	gi|297745219	32742.6	0.318	INYYGPK	47.8	42.1	4.36		427.723	853.431	854.441	2	-0.002182	-2.554	142	148	10
2327	182	unnamed protein product [Vitis vinifera]	gi|297745219	32742.6	0.318	IVNVSSSLGK	52.2	44.8	8.11		502.29	1002.57	1003.58	2	-0.004842	-4.825	166	175	10
2327	182	unnamed protein product [Vitis vinifera]	gi|297745219	32742.6	0.318	LALLPDGGPSGHFFSR	114	45.1	12.5		557.627	1669.86	1670.87	3	0.002112	1.264	281	296	10
2327	182	unnamed protein product [Vitis vinifera]	gi|297745219	32742.6	0.318	LQNVTNEWAK	37.3	45.3	9.1		601.814	1201.61	1202.62	2	0.004658	3.873	176	185	10
2327	182	unnamed protein product [Vitis vinifera]	gi|297745219	32742.6	0.318	QLAASGVR	38.6	45.9	4.39		401.232	800.45	801.458	2	-0.0004219	-0.5265	30	37	10
2327	182	unnamed protein product [Vitis vinifera]	gi|297745219	32742.6	0.318	VDEVLNQFLK	55.9	45.4	10.2		602.832	1203.65	1204.66	2	-0.0007419	-0.6159	199	208	10
2327	182	unnamed protein product [Vitis vinifera]	gi|297745219	32742.6	0.318	VVLTAR	37.8	46.9	1.39		329.716	657.417	658.425	2	-0.0006619	-1.005	38	43	10
2327	182	PREDICTED: ran-binding protein 1 homolog c [Vitis vinifera]	gi|225429578	24561.8	0.0955	FASVENcK	65.7	41	6.33	c7: Carbamidomethyl (+57.02)	477.722	953.429	954.435	2	0.001173	1.229	144	151	1
2327	182	PREDICTED: ran-binding protein 1 homolog c [Vitis vinifera]	gi|225429578	24561.8	0.0955	LNVGESKDEEGTK	45.5	44.6	8.11		469.232	1404.68	1405.68	3	0.001962	1.396	184	196	1
2327	182	unnamed protein product [Vitis vinifera]	gi|302144105,gi|359483345	46212.6	0.235	cYFSVPcYFHSK	18.2	38.4	7.32	c1: Carbamidomethyl (+57.02), c7: Carbamidomethyl (+57.02)	532.234	1593.68	1594.68	3	0.005381	3.375	36	47	9
2327	182	unnamed protein product [Vitis vinifera]	gi|302144105,gi|359483345	46212.6	0.235	EPVFSFWLNR	38.5	45	8.74		647.835	1293.65	1294.66	2	0.003818	2.949	140	149	9
2327	182	unnamed protein product [Vitis vinifera]	gi|302144105,gi|359483345	46212.6	0.235	GEHTYVPVTQK	59.3	44.6	9.43		629.824	1257.63	1258.64	2	-0.001022	-0.8119	171	181	9
2327	182	unnamed protein product [Vitis vinifera]	gi|302144105,gi|359483345	46212.6	0.235	KTDDDEGGELVFGGVDPDHFK	46.2	42	10.8		759.684	2276.03	2277.03	3	0.005522	2.425	150	170	9
2327	182	unnamed protein product [Vitis vinifera]	gi|302144105,gi|359483345	46212.6	0.235	NQEFIEATR	42.2	44.9	7.46		554.275	1106.54	1107.54	2	0.0002581	0.233	90	98	9
2327	182	unnamed protein product [Vitis vinifera]	gi|302144105,gi|359483345	46212.6	0.235	NQEFIEATREPSVTFLVAK	6.63	45	8.59		727.05	2178.13	2179.14	3	-0.003548	-1.628	90	108	9
2327	182	unnamed protein product [Vitis vinifera]	gi|302144105,gi|359483345	46212.6	0.235	SADIHYGTGAISGFFSEDNVK	57.9	43.5	12.9		739.018	2214.03	2215.03	3	0.009552	4.312	62	82	9
2327	182	unnamed protein product [Vitis vinifera]	gi|302144105,gi|359483345	46212.6	0.235	TDDDEGGELVFGGVDPDHFK	53.4	39	12.9		716.984	2147.93	2148.94	3	0.002442	1.136	151	170	9
2327	182	unnamed protein product [Vitis vinifera]	gi|302144105,gi|359483345	46212.6	0.235	VGDLVVK	39.2	45.2	5.13		365.229	728.443	729.451	2	-0.0001419	-0.1946	83	89	9
2327	182	hypothetical protein VITISV_032012 [Vitis vinifera]	gi|147856131,gi|225449198	38907.8	0.178	FIADTVASIPK	42.2	44.9	8.04		581.328	1160.64	1161.65	2	-0.003002	-2.584	300	310	4
2327	182	hypothetical protein VITISV_032012 [Vitis vinifera]	gi|147856131,gi|225449198	38907.8	0.178	ISPPAFDR	48.3	44.4	4.15		451.743	901.471	902.473	2	0.005018	5.56	311	318	4
2327	182	hypothetical protein VITISV_032012 [Vitis vinifera]	gi|147856131,gi|225449198	38907.8	0.178	TQLSLAEK	34.7	46.2	4.82		445.252	888.49	889.499	2	-0.001422	-1.599	339	346	4
2327	182	hypothetical protein VITISV_032012 [Vitis vinifera]	gi|147856131,gi|225449198	38907.8	0.178	YVDSVVEGQVVPDNDIGR	56.2	45	8.87		654.325	1959.95	1960.96	3	-0.0005579	-0.2845	282	299	4
2327	182	unnamed protein product [Vitis vinifera]	gi|296083911,gi|359479299	27656	0.553	AITFSDLHTEAGLK	66.5	45.4	8.15		501.601	1501.78	1502.79	3	0.002522	1.678	2	15	10
2327	182	unnamed protein product [Vitis vinifera]	gi|296083911,gi|359479299	27656	0.553	AVGVSLGcQAAPVEAAPK	53	44.8	8.23	c8: Carbamidomethyl (+57.02)	575.64	1723.9	1724.9	3	0.006447	3.737	73	90	10
2327	182	unnamed protein product [Vitis vinifera]	gi|296083911,gi|359479299	27656	0.553	EAAPAGDDDDDLDLFGDETEEEKK	39	34.8	10.9		875.37	2623.09	2624.1	3	-0.004598	-1.752	94	117	10
2327	182	unnamed protein product [Vitis vinifera]	gi|296083911,gi|359479299	27656	0.553	KLEEAVR	41.3	45.7	3.96		422.748	843.482	844.489	2	0.0001781	0.2108	155	161	10
2327	182	unnamed protein product [Vitis vinifera]	gi|296083911,gi|359479299	27656	0.553	LAPVGYGIK	42.8	42.6	7.27		459.277	916.539	917.546	2	0.001038	1.131	175	183	10
2327	182	unnamed protein product [Vitis vinifera]	gi|296083911,gi|359479299	27656	0.553	SIEmPGLLWGASK	49.6	45.5	9.76	m4: Oxidation (+15.99)	702.87	1403.73	1404.72	2	0.01342	9.556	162	174	10
2327	182	unnamed protein product [Vitis vinifera]	gi|296083911,gi|359479299	27656	0.553	SLDEFLSGK	45	44.6	9.46		498.257	994.499	995.505	2	0.002098	2.108	16	24	10
2327	182	unnamed protein product [Vitis vinifera]	gi|296083911,gi|359479299	27656	0.553	SSVLLDVKPWDDETDMK	89.5	44.5	0		659.988	1976.94	1977.95	3	0.001582	0.7998	138	154	10
2327	182	unnamed protein product [Vitis vinifera]	gi|296083911,gi|359479299	27656	0.553	VYAAVLEKPGSHFPNASK	56.8	45.2	10.2		639.006	1914	1915.01	3	-0.004068	-2.124	39	56	10
2327	182	unnamed protein product [Vitis vinifera]	gi|296083911,gi|359479299	27656	0.553	WYScVSSHLAK	15.7	43.7	4.8	c4: Carbamidomethyl (+57.02)	446.549	1336.62	1337.63	3	0.0008168	0.6106	57	67	10
2327	182	PREDICTED: 14-3-3-like protein D-like [Vitis vinifera]	gi|225461654	28847.3	0.535	AYQTASTTAESDLSPTHPIR	116	44.9	13.5		1073.53	2145.04	2146.04	2	0.002778	1.295	150	169	8
2327	182	PREDICTED: 14-3-3-like protein D-like [Vitis vinifera]	gi|225461654	28847.3	0.535	DNLTLWTSDIPEDGEDQK	59.5	41.6	11.7		1038.47	2074.93	2075.94	2	-0.001882	-0.9065	225	242	8
2327	182	PREDICTED: 14-3-3-like protein D-like [Vitis vinifera]	gi|225461654	28847.3	0.535	DSTLImQLLR	48.7	44.7	5.17	m6: Oxidation (+15.99)	603.335	1204.65	1205.66	2	0.005823	4.83	215	224	8
2327	182	PREDICTED: 14-3-3-like protein D-like [Vitis vinifera]	gi|225461654	28847.3	0.535	GDYYR	25.2	35.6	0.182		337.15	672.286	673.294	2	-0.001202	-1.785	125	129	8
2327	182	PREDICTED: 14-3-3-like protein D-like [Vitis vinifera]	gi|225461654	28847.3	0.535	IKEYR	28.8	43.7	0		354.704	707.393	708.404	2	-0.003322	-4.689	81	85	8
2327	182	PREDICTED: 14-3-3-like protein D-like [Vitis vinifera]	gi|225461654	28847.3	0.535	ILSSIEQK	44	44.5	5.05		459.27	916.525	917.53	2	0.001778	1.938	61	68	8
2327	182	PREDICTED: 14-3-3-like protein D-like [Vitis vinifera]	gi|225461654	28847.3	0.535	LAEQAER	38	43.3	3.67		408.712	815.409	816.421	2	-0.005122	-6.274	12	18	8
2327	182	PREDICTED: 14-3-3-like protein D-like [Vitis vinifera]	gi|225461654	28847.3	0.535	LDVDLTVEER	69.1	45.8	9.68		594.809	1187.6	1188.61	2	0.0009581	0.806	32	41	8
2327	182	PREDICTED: 14-3-3-like protein D-like [Vitis vinifera]	gi|225461654	28847.3	0.535	mKGDYYR	33.9	39.6	1.88	m1: Oxidation (+15.99)	474.716	947.418	948.424	2	0.000743	0.7835	123	129	8
2327	182	PREDICTED: 14-3-3-like protein D-like [Vitis vinifera]	gi|225461654	28847.3	0.535	NLLSVGYK	45.3	42.1	6.77		447.259	892.503	893.509	2	0.0009581	1.072	42	49	8
2327	182	PREDICTED: 14-3-3-like protein D-like [Vitis vinifera]	gi|225461654	28847.3	0.535	QAFDEAISELDTLSEESYK	97.9	43.2	13.2		1088.01	2174	2175	2	0.01318	6.059	196	214	8
2327	182	PREDICTED: 14-3-3-like protein D-like [Vitis vinifera]	gi|225461654	28847.3	0.535	YDEMVDAmK	66.9	32.7	0	m8: Oxidation (+15.99)	559.228	1116.44	1117.45	2	-0.004797	-4.293	19	27	8
2327	182	PREDICTED: 14-3-3-like protein D-like [Vitis vinifera]	gi|225461654	28847.3	0.535	YDEMVDAmKK	47.1	39.3	0	m8: Oxidation (+15.99)	623.279	1244.54	1245.55	2	0.000583	0.4681	19	28	8
2327	182	PREDICTED: 14-3-3-like protein D-like [Vitis vinifera]	gi|225461654	28847.3	0.535	YLAEFK	32.3	38.9	1.68		385.707	769.4	770.408	2	-0.0008819	-1.145	130	135	8
2327	182	RecName: Full=S-adenosylmethionine synthase 2; Short=AdoMet synthase 2; AltName: Full=Methionine adenosyltransferase 2; Short=MAT 2	gi|223635284	43095.8	0.13	TNMVMVFGEITTK	64	44.4	0		735.873	1469.73	1470.73	2	0.004818	3.276	48	60	3
2327	182	RecName: Full=S-adenosylmethionine synthase 2; Short=AdoMet synthase 2; AltName: Full=Methionine adenosyltransferase 2; Short=MAT 2	gi|223635284	43095.8	0.13	TQVTVEYHNDGGAR	65.3	42.8	9.16		516.245	1545.71	1546.72	3	-0.003108	-2.009	170	183	3
2327	182	RecName: Full=S-adenosylmethionine synthase 2; Short=AdoMet synthase 2; AltName: Full=Methionine adenosyltransferase 2; Short=MAT 2	gi|223635284	43095.8	0.13	VHTVLISTQHDETVTNDEIAADLK	89.8	45.3	15		883.782	2648.32	2649.34	3	-0.006848	-2.585	188	211	3
2327	182	PREDICTED: succinate dehydrogenase [ubiquinone] flavoprotein subunit 1, mitochondrial isoform 1 [Vitis vinifera]	gi|225430776	73642.3	0.13	FQAASTILATGGYGR	91.1	44.7	10.9		756.893	1511.77	1512.78	2	-0.002802	-1.852	272	286	5
2327	182	PREDICTED: succinate dehydrogenase [ubiquinone] flavoprotein subunit 1, mitochondrial isoform 1 [Vitis vinifera]	gi|225430776	73642.3	0.13	HTLGYWENEK	38.1	42.2	10.6		638.799	1275.58	1276.6	2	-0.004142	-3.245	634	643	5
2327	182	PREDICTED: succinate dehydrogenase [ubiquinone] flavoprotein subunit 1, mitochondrial isoform 1 [Vitis vinifera]	gi|225430776	73642.3	0.13	LGANSLLDIVVFGR	71.7	41.7	9.95		737.43	1472.84	1473.84	2	0.009338	6.336	478	491	5
2327	182	PREDICTED: succinate dehydrogenase [ubiquinone] flavoprotein subunit 1, mitochondrial isoform 1 [Vitis vinifera]	gi|225430776	73642.3	0.13	TYFSATSAHTcTGDGNAMVAR	84.5	39	0	c11: Carbamidomethyl (+57.02)	739.993	2216.96	2217.97	3	0.0001068	0.04813	287	307	5
2327	182	PREDICTED: succinate dehydrogenase [ubiquinone] flavoprotein subunit 1, mitochondrial isoform 1 [Vitis vinifera]	gi|225430776	73642.3	0.13	VAEIHKPGEK	24	44.1	4.73		369.876	1106.61	1107.62	3	-0.002848	-2.571	497	506	5
2327	182	PREDICTED: 14-3-3-like protein [Vitis vinifera]	gi|225468983	28764.4	0.561	DSTLImQLLR	48.7	44.7	5.17	m6: Oxidation (+15.99)	603.335	1204.65	1205.66	2	0.005823	4.83	219	228	10
2327	182	PREDICTED: 14-3-3-like protein [Vitis vinifera]	gi|225468983	28764.4	0.561	EAAESTLAAYK	80.1	44.6	10.7		577.291	1152.57	1153.57	2	0.0005581	0.4838	146	156	10
2327	182	PREDICTED: 14-3-3-like protein [Vitis vinifera]	gi|225468983	28764.4	0.561	EENVYmAK	29.9	39	4.72	m6: Oxidation (+15.99)	500.227	998.439	999.445	2	0.000703	0.7034	8	15	10
2327	182	PREDICTED: 14-3-3-like protein [Vitis vinifera]	gi|225468983	28764.4	0.561	GNEDHVATIR	43.3	43.7	7.78		556.279	1110.54	1111.55	2	0.0004781	0.4301	77	86	10
2327	182	PREDICTED: 14-3-3-like protein [Vitis vinifera]	gi|225468983	28764.4	0.561	IESELSSIcDGILR	97.9	45.3	12.6	c9: Carbamidomethyl (+57.02)	796.401	1590.79	1591.8	2	-0.004567	-2.869	92	105	10
2327	182	PREDICTED: 14-3-3-like protein [Vitis vinifera]	gi|225468983	28764.4	0.561	IISSIEQK	44	44.5	5.05		459.27	916.525	917.53	2	0.001778	1.938	65	72	10
2327	182	PREDICTED: 14-3-3-like protein [Vitis vinifera]	gi|225468983	28764.4	0.561	KEAAESTLAAYK	33.3	44.3	7.58		427.894	1280.66	1281.67	3	-0.002688	-2.097	145	156	10
2327	182	PREDICTED: 14-3-3-like protein [Vitis vinifera]	gi|225468983	28764.4	0.561	LAEQAER	38	43.3	3.67		408.712	815.409	816.421	2	-0.005122	-6.274	16	22	10
2327	182	PREDICTED: 14-3-3-like protein [Vitis vinifera]	gi|225468983	28764.4	0.561	LIPSATSGDSK	66	46.1	7.24		538.286	1074.56	1075.56	2	0.002118	1.969	111	121	10
2327	182	PREDICTED: 14-3-3-like protein [Vitis vinifera]	gi|225468983	28764.4	0.561	NLLSVAYK	26.7	41.2	3.72		454.266	906.518	907.525	2	0.0006781	0.7472	46	53	10
2327	182	PREDICTED: 14-3-3-like protein [Vitis vinifera]	gi|225468983	28764.4	0.561	QAFDEAIAELDTLGEESYK	68.9	43.9	11.7		710.341	2128	2128.99	3	0.01472	6.915	200	218	10
2327	182	PREDICTED: 14-3-3-like protein [Vitis vinifera]	gi|225468983	28764.4	0.561	SAQDIATVELAPTHPIR	94.7	44.9	11.8		909.988	1817.96	1818.97	2	-0.002542	-1.397	157	173	10
2327	182	PREDICTED: 14-3-3-like protein [Vitis vinifera]	gi|225468983	28764.4	0.561	VTAEAEELTVEER	51.8	45.2	10.5		738.371	1474.73	1475.72	2	0.012	8.13	33	45	10
2327	182	PREDICTED: 14-3-3-like protein [Vitis vinifera]	gi|225468983	28764.4	0.561	YLAEFK	32.3	38.9	1.68		385.707	769.4	770.408	2	-0.0008819	-1.145	134	139	10
2327	182	hypothetical protein VITISV_027630 [Vitis vinifera]	gi|147791852,gi|225468761	33216.2	0.0609	FGGEFLVPSYR	32.4	44.1	8.6		636.33	1270.65	1271.64	2	0.01142	8.979	206	216	2
2327	182	hypothetical protein VITISV_027630 [Vitis vinifera]	gi|147791852,gi|225468761	33216.2	0.0609	VPFLFTIK	42.4	39	8.13		482.799	963.584	964.587	2	0.004698	4.871	188	195	2
2327	182	PREDICTED: isoflavone reductase homolog P3 [Vitis vinifera]	gi|225458243,gi|76559892	33788.2	0.0649	VIILGDGNPK	50.7	39.6	7.16		513.303	1024.59	1025.6	2	-0.001142	-1.113	176	185	2
2327	182	PREDICTED: isoflavone reductase homolog P3 [Vitis vinifera]	gi|225458243,gi|76559892	33788.2	0.0649	VYVPEEQVLK	9.3	45.6	4.25		602.333	1202.65	1203.66	2	-0.002942	-2.444	241	250	2
2327	182	PREDICTED: 14-3-3 protein [Vitis vinifera]	gi|359492889	29327.1	0.362	DSTLImQLLR	48.7	44.7	5.17	m6: Oxidation (+15.99)	603.335	1204.65	1205.66	2	0.005823	4.83	222	231	2
2327	182	PREDICTED: 14-3-3 protein [Vitis vinifera]	gi|359492889	29327.1	0.362	EAAESTLTAYK	10.3	43.8	4.64		592.296	1182.58	1183.58	2	0.001158	0.9784	149	159	2
2327	182	PREDICTED: 14-3-3 protein [Vitis vinifera]	gi|359492889	29327.1	0.362	EENVYmAK	29.9	39	4.72	m6: Oxidation (+15.99)	500.227	998.439	999.445	2	0.000703	0.7034	9	16	2
2327	182	PREDICTED: 14-3-3 protein [Vitis vinifera]	gi|359492889	29327.1	0.362	IISSIEQK	44	44.5	5.05		459.27	916.525	917.53	2	0.001778	1.938	68	75	2
2327	182	PREDICTED: 14-3-3 protein [Vitis vinifera]	gi|359492889	29327.1	0.362	LAEQAER	38	43.3	3.67		408.712	815.409	816.421	2	-0.005122	-6.274	17	23	2
2327	182	PREDICTED: 14-3-3 protein [Vitis vinifera]	gi|359492889	29327.1	0.362	NLLSVAYK	26.7	41.2	3.72		454.266	906.518	907.525	2	0.0006781	0.7472	49	56	2
2327	182	PREDICTED: 14-3-3 protein [Vitis vinifera]	gi|359492889	29327.1	0.362	QAFDEAIAELDTLGEESYK	68.9	43.9	11.7		710.341	2128	2128.99	3	0.01472	6.915	203	221	2
2327	182	PREDICTED: 14-3-3 protein [Vitis vinifera]	gi|359492889	29327.1	0.362	SAQDIANAELAPTHPIR	19.1	45.5	6.9		601.981	1802.92	1803.93	3	-0.005928	-3.286	160	176	2
2327	182	PREDICTED: 14-3-3 protein [Vitis vinifera]	gi|359492889	29327.1	0.362	YLAEFK	32.3	38.9	1.68		385.707	769.4	770.408	2	-0.0008819	-1.145	137	142	2
2327	182	PREDICTED: 14-3-3 protein 7 [Vitis vinifera]	gi|225459292	28722	0.663	ADEPQAES	35.5	32.4	2.76		846.345	845.338	846.348	1	-0.002626	-3.103	245	252	18
2327	182	PREDICTED: 14-3-3 protein 7 [Vitis vinifera]	gi|225459292	28722	0.663	AYEAATSTAASDLPPTHPIR	82.6	45.3	9.85		690.345	2068.01	2069.03	3	-0.008838	-4.272	151	170	18
2327	182	PREDICTED: 14-3-3 protein 7 [Vitis vinifera]	gi|225459292	28722	0.663	DNLTLWTSDLPEEGGETSK	67.3	44	11.1		1046.5	2090.98	2091.97	2	0.01308	6.252	226	244	18
2327	182	PREDICTED: 14-3-3 protein 7 [Vitis vinifera]	gi|225459292	28722	0.663	DNLTLWTSDLPEEGGETSKADEPQAES	10.5	40.9	7.65		973.775	2918.3	2919.3	3	0.008752	2.998	226	252	18
2327	182	PREDICTED: 14-3-3 protein 7 [Vitis vinifera]	gi|225459292	28722	0.663	DSTLImQLLR	48.7	44.7	5.17	m6: Oxidation (+15.99)	603.335	1204.65	1205.66	2	0.005823	4.83	216	225	18
2327	182	PREDICTED: 14-3-3 protein 7 [Vitis vinifera]	gi|225459292	28722	0.663	EQQVYLAR	50.7	45.2	6.97		503.771	1005.53	1006.53	2	0.003358	3.336	5	12	18
2327	182	PREDICTED: 14-3-3 protein 7 [Vitis vinifera]	gi|225459292	28722	0.663	GDYYR	25.2	35.6	0.182		337.15	672.286	673.294	2	-0.001202	-1.785	126	130	18
2327	182	PREDICTED: 14-3-3 protein 7 [Vitis vinifera]	gi|225459292	28722	0.663	IcNDILSVIDNHLIPSSSTGESTVFYYK	1.33	45.1	6.29	c2: Carbamidomethyl (+57.02)	1058.19	3171.55	3172.55	3	0.009997	3.151	96	123	18
2327	182	PREDICTED: 14-3-3 protein 7 [Vitis vinifera]	gi|225459292	28722	0.663	ILSSIEQK	44	44.5	5.05		459.27	916.525	917.53	2	0.001778	1.938	62	69	18
2327	182	PREDICTED: 14-3-3 protein 7 [Vitis vinifera]	gi|225459292	28722	0.663	LAEQAER	38	43.3	3.67		408.712	815.409	816.421	2	-0.005122	-6.274	13	19	18
2327	182	PREDICTED: 14-3-3 protein 7 [Vitis vinifera]	gi|225459292	28722	0.663	mKGDYYR	33.9	39.6	1.88	m1: Oxidation (+15.99)	474.716	947.418	948.424	2	0.000743	0.7835	124	130	18
2327	182	PREDICTED: 14-3-3 protein 7 [Vitis vinifera]	gi|225459292	28722	0.663	NLVSVGYK	36.3	43.4	4.74		440.249	878.483	879.493	2	-0.002722	-3.095	43	50	18
2327	182	PREDICTED: 14-3-3 protein 7 [Vitis vinifera]	gi|225459292	28722	0.663	QAFDEAIAELDSLNEESYK	43.7	43.1	9.91		724.675	2171	2172	3	0.01111	5.116	197	215	18
2327	182	PREDICTED: 14-3-3 protein 7 [Vitis vinifera]	gi|225459292	28722	0.663	QRVEDELSK	34	45.4	6.48		552.289	1102.56	1103.57	2	0.001198	1.086	87	95	18
2327	182	PREDICTED: 14-3-3 protein 7 [Vitis vinifera]	gi|225459292	28722	0.663	VEDELSK	46.3	45.1	1.83		410.209	818.404	819.409	2	0.001278	1.56	89	95	18
2327	182	PREDICTED: 14-3-3 protein 7 [Vitis vinifera]	gi|225459292	28722	0.663	YDEMVEAmK	47.1	34.7	0	m8: Oxidation (+15.99)	566.237	1130.46	1131.47	2	-0.001957	-1.73	20	28	18
2327	182	PREDICTED: 14-3-3 protein 7 [Vitis vinifera]	gi|225459292	28722	0.663	YDEMVEAmKK	47.9	39.9	0	m8: Oxidation (+15.99)	420.526	1258.56	1259.56	3	-0.000653	-0.5184	20	29	18
2327	182	PREDICTED: 14-3-3 protein 7 [Vitis vinifera]	gi|225459292	28722	0.663	YLAEFK	32.3	38.9	1.68		385.707	769.4	770.408	2	-0.0008819	-1.145	131	136	18
2327	182	hypothetical protein VITISV_027076 [Vitis vinifera]	gi|147820937,gi|378405175,gi|37992763	21524.6	0.111	IVVSESGWPSEGGTAATVDNAR	79.2	44.6	11.9		735.025	2202.05	2203.06	3	-0.0006379	-0.2896	118	139	1
6626	183	PREDICTED: d-3-phosphoglycerate dehydrogenase, chloroplastic-like [Vitis vinifera]	gi|225428898	62538	0.104	EVFEASSGR	32	42.3	5.34		491.236	980.457	981.463	2	0.0006981	0.7112	108	116	5
6626	183	PREDICTED: d-3-phosphoglycerate dehydrogenase, chloroplastic-like [Vitis vinifera]	gi|225428898	62538	0.104	GGVIDEEALVR	36.3	44.9	7.61		579.312	1156.61	1157.62	2	0.001418	1.225	284	294	5
6626	183	PREDICTED: d-3-phosphoglycerate dehydrogenase, chloroplastic-like [Vitis vinifera]	gi|225428898	62538	0.104	LAVQLVSGGSGVK	59.5	43.5	11.7		607.861	1213.71	1214.71	2	0.004138	3.407	390	402	5
6626	183	PREDICTED: d-3-phosphoglycerate dehydrogenase, chloroplastic-like [Vitis vinifera]	gi|225428898	62538	0.104	LGAAGLDLLK	61.1	40.8	10.7		485.8	969.585	970.593	2	-0.001642	-1.692	62	71	5
6626	183	PREDICTED: d-3-phosphoglycerate dehydrogenase, chloroplastic-like [Vitis vinifera]	gi|225428898	62538	0.104	NVAQADASVK	36	45.7	7.31		501.766	1001.52	1002.52	2	0.002678	2.671	167	176	5
6626	183	PREDICTED: d-3-phosphoglycerate dehydrogenase, chloroplastic-like [Vitis vinifera]	gi|225428898	62538	0.104	YVGVSLVGK	29.8	41	5.75		461.274	920.533	921.54	2	9.806e-05	0.1064	185	193	5
6626	183	PREDICTED: 14-3-3-like protein D-like [Vitis vinifera]	gi|225461654	28847.3	0.118	AYQTASTTAESDLSPTHPIR	116	44.7	12.8		716.017	2145.03	2146.04	3	-0.005848	-2.725	150	169	2
6626	183	PREDICTED: 14-3-3-like protein D-like [Vitis vinifera]	gi|225461654	28847.3	0.118	LDVDLTVEER	70	44.6	11.8		594.808	1187.6	1188.61	2	-0.002022	-1.701	32	41	2
6626	183	pyruvate decarboxylase 1 [Vitis vinifera]	gi|10732644,gi|225439520	62254.3	0.0609	AILVQPER	53	39.8	6.91		463.277	924.54	925.547	2	0.001058	1.143	316	323	3
6626	183	pyruvate decarboxylase 1 [Vitis vinifera]	gi|10732644,gi|225439520	62254.3	0.0609	IYVPEGQPLR	38.2	45.3	6.57		586.325	1170.64	1171.65	2	-0.003862	-3.296	361	370	3
6626	183	pyruvate decarboxylase 1 [Vitis vinifera]	gi|10732644,gi|225439520	62254.3	0.0609	NWNYTGLVDAIHNGEGK	28.2	43.9	8.98		629.971	1886.89	1887.9	3	0.0003221	0.1706	498	514	3
6626	183	RecName: Full=S-adenosylmethionine synthase 5; Short=AdoMet synthase 5; AltName: Full=Methionine adenosyltransferase 5; Short=MAT 5	gi|223635289	42774.7	0.151	ADIDYEK	30	40.5	4.26		427.202	852.389	853.394	2	0.002198	2.576	61	67	5
6626	183	RecName: Full=S-adenosylmethionine synthase 5; Short=AdoMet synthase 5; AltName: Full=Methionine adenosyltransferase 5; Short=MAT 5	gi|223635289	42774.7	0.151	DDPDFTWEVVKPLK	44.5	45.3	9.82		563.621	1687.84	1688.85	3	-0.004028	-2.385	374	387	5
6626	183	RecName: Full=S-adenosylmethionine synthase 5; Short=AdoMet synthase 5; AltName: Full=Methionine adenosyltransferase 5; Short=MAT 5	gi|223635289	42774.7	0.151	FVIGGPHGDAGLTGR	82.6	44.7	12.2		485.256	1452.75	1453.75	3	-0.002488	-1.711	238	252	5
6626	183	RecName: Full=S-adenosylmethionine synthase 5; Short=AdoMet synthase 5; AltName: Full=Methionine adenosyltransferase 5; Short=MAT 5	gi|223635289	42774.7	0.151	TIFHLNPSGR	61.9	43.2	1.15		381.209	1140.61	1141.61	3	0.001252	1.097	228	237	5
6626	183	RecName: Full=S-adenosylmethionine synthase 5; Short=AdoMet synthase 5; AltName: Full=Methionine adenosyltransferase 5; Short=MAT 5	gi|223635289	42774.7	0.151	TNMVMVFGEITTK	66.2	44.6	0		735.877	1469.74	1470.73	2	0.01278	8.688	48	60	5
6626	183	PREDICTED: 2,3-bisphosphoglycerate-independent phosphoglycerate mutase isoform 1 [Vitis vinifera]	gi|225439064,gi|239056191	61074.9	0.649	AHGSAVGLPTEDDmGNSEVGHNALGAGR	112	41.8	12.5	m14: Oxidation (+15.99)	912.418	2734.23	2735.24	3	-0.003743	-1.368	65	92	26
6626	183	PREDICTED: 2,3-bisphosphoglycerate-independent phosphoglycerate mutase isoform 1 [Vitis vinifera]	gi|225439064,gi|239056191	61074.9	0.649	AVEIAEK	41	44.9	4.91		380.215	758.416	759.425	2	-0.001702	-2.241	403	409	26
6626	183	PREDICTED: 2,3-bisphosphoglycerate-independent phosphoglycerate mutase isoform 1 [Vitis vinifera]	gi|225439064,gi|239056191	61074.9	0.649	DAILSR	48.5	48.4	-0.00445		337.695	673.376	674.383	2	-0.0004019	-0.596	412	417	26
6626	183	PREDICTED: 2,3-bisphosphoglycerate-independent phosphoglycerate mutase isoform 1 [Vitis vinifera]	gi|225439064,gi|239056191	61074.9	0.649	EKGVDAQIASGGGR	72.5	45.3	10.6		672.848	1343.68	1344.69	2	0.002338	1.739	193	206	26
6626	183	PREDICTED: 2,3-bisphosphoglycerate-independent phosphoglycerate mutase isoform 1 [Vitis vinifera]	gi|225439064,gi|239056191	61074.9	0.649	FGHVTFFWNGNR	16.8	44.2	4.94		494.574	1480.7	1481.71	3	0.001282	0.8653	362	373	26
6626	183	PREDICTED: 2,3-bisphosphoglycerate-independent phosphoglycerate mutase isoform 1 [Vitis vinifera]	gi|225439064,gi|239056191	61074.9	0.649	GVDAQIASGGGR	56.2	43.8	11.6		544.277	1086.54	1087.55	2	-0.002282	-2.098	195	206	26
6626	183	PREDICTED: 2,3-bisphosphoglycerate-independent phosphoglycerate mutase isoform 1 [Vitis vinifera]	gi|225439064,gi|239056191	61074.9	0.649	GWDAQVLGEAPHK	85.4	45.1	12		704.356	1406.7	1407.7	2	0.003098	2.201	224	236	26
6626	183	PREDICTED: 2,3-bisphosphoglycerate-independent phosphoglycerate mutase isoform 1 [Vitis vinifera]	gi|225439064,gi|239056191	61074.9	0.649	IDQLQLLLK	54.2	39.2	11		542.346	1082.68	1083.68	2	0.007558	6.974	143	151	26
6626	183	PREDICTED: 2,3-bisphosphoglycerate-independent phosphoglycerate mutase isoform 1 [Vitis vinifera]	gi|225439064,gi|239056191	61074.9	0.649	IHYAGMLQYDGELK	35.9	44.7	0		546.605	1636.79	1637.8	3	0.0002821	0.1722	313	326	26
6626	183	PREDICTED: 2,3-bisphosphoglycerate-independent phosphoglycerate mutase isoform 1 [Vitis vinifera]	gi|225439064,gi|239056191	61074.9	0.649	IILDAIEQVGGIYVVTADHGNAEDmVK	23.6	45	8.62	m25: Oxidation (+15.99)	962.828	2885.46	2886.46	3	0.01294	4.482	454	480	26
6626	183	PREDICTED: 2,3-bisphosphoglycerate-independent phosphoglycerate mutase isoform 1 [Vitis vinifera]	gi|225439064,gi|239056191	61074.9	0.649	IQILTSHTLQPVPIAIGGPGLAAGVR	55.4	31.3	12		860.514	2578.52	2579.5	3	0.02338	9.064	495	520	26
6626	183	PREDICTED: 2,3-bisphosphoglycerate-independent phosphoglycerate mutase isoform 1 [Vitis vinifera]	gi|225439064,gi|239056191	61074.9	0.649	IYEGEGFK	35.1	40.7	3.95		471.73	941.446	942.457	2	-0.003822	-4.055	110	117	26
6626	183	PREDICTED: 2,3-bisphosphoglycerate-independent phosphoglycerate mutase isoform 1 [Vitis vinifera]	gi|225439064,gi|239056191	61074.9	0.649	LPNHYLVSPPEIER	75	45	11.5		832.446	1662.88	1663.88	2	0.004338	2.607	327	340	26
6626	183	PREDICTED: 2,3-bisphosphoglycerate-independent phosphoglycerate mutase isoform 1 [Vitis vinifera]	gi|225439064,gi|239056191	61074.9	0.649	LVDFALDSGK	54	45	9.52		532.789	1063.56	1064.56	2	0.007538	7.081	100	109	26
6626	183	PREDICTED: 2,3-bisphosphoglycerate-independent phosphoglycerate mutase isoform 1 [Vitis vinifera]	gi|225439064,gi|239056191	61074.9	0.649	MYVTMDR	31.9	37.4	0		458.206	914.398	915.406	2	-0.0007819	-0.8542	207	213	26
6626	183	PREDICTED: 2,3-bisphosphoglycerate-independent phosphoglycerate mutase isoform 1 [Vitis vinifera]	gi|225439064,gi|239056191	61074.9	0.649	NDVPGGGLANVAATVmNLHGYEAPSDYEPTLIEVIDN	11.8	43.3	11.4	m16: Oxidation (+15.99)	1291.28	3870.82	3871.83	3	-0.007323	-1.891	523	559	26
6626	183	PREDICTED: 2,3-bisphosphoglycerate-independent phosphoglycerate mutase isoform 1 [Vitis vinifera]	gi|225439064,gi|239056191	61074.9	0.649	SGQPLLDK	41.1	42.3	6.1		429.239	856.464	857.473	2	-0.001802	-2.101	484	491	26
6626	183	PREDICTED: 2,3-bisphosphoglycerate-independent phosphoglycerate mutase isoform 1 [Vitis vinifera]	gi|225439064,gi|239056191	61074.9	0.649	SGYFDPSMEEYVEIPSDSGITFNVKPK	62.6	43.7	0		1012.81	3035.42	3036.42	3	0.008362	2.754	374	400	26
6626	183	PREDICTED: 2,3-bisphosphoglycerate-independent phosphoglycerate mutase isoform 1 [Vitis vinifera]	gi|225439064,gi|239056191	61074.9	0.649	SLEYEDFDK	43.1	38.1	6.97		573.257	1144.5	1145.5	2	0.006598	5.76	296	304	26
6626	183	PREDICTED: 2,3-bisphosphoglycerate-independent phosphoglycerate mutase isoform 1 [Vitis vinifera]	gi|225439064,gi|239056191	61074.9	0.649	SLEYEDFDKFDR	76.9	40.6	13.1		782.355	1562.69	1563.7	2	0.005658	3.618	296	307	26
6626	183	PREDICTED: 2,3-bisphosphoglycerate-independent phosphoglycerate mutase isoform 1 [Vitis vinifera]	gi|225439064,gi|239056191	61074.9	0.649	TFAcSETVK	41.3	42.2	8.83	c4: Carbamidomethyl (+57.02)	521.748	1041.48	1042.49	2	0.0008328	0.7988	353	361	26
6626	183	PREDICTED: 2,3-bisphosphoglycerate-independent phosphoglycerate mutase isoform 1 [Vitis vinifera]	gi|225439064,gi|239056191	61074.9	0.649	TSGEYLVHNGVR	66.2	45.4	9.27		666.343	1330.67	1331.67	2	0.008358	6.276	341	352	26
6626	183	PREDICTED: 2,3-bisphosphoglycerate-independent phosphoglycerate mutase isoform 1 [Vitis vinifera]	gi|225439064,gi|239056191	61074.9	0.649	VHILTDGR	35.2	42.9	0.906		304.176	909.506	910.511	3	0.002202	2.418	163	170	26
6626	183	PREDICTED: 2,3-bisphosphoglycerate-independent phosphoglycerate mutase isoform 1 [Vitis vinifera]	gi|225439064,gi|239056191	61074.9	0.649	VNLPNGDmVGHTGDIEATIVAcK	30.7	44.5	9.27	m8: Oxidation (+15.99), c22: Carbamidomethyl (+57.02)	809.724	2426.15	2427.16	3	-0.007628	-3.143	424	446	26
6626	183	PREDICTED: 2,3-bisphosphoglycerate-independent phosphoglycerate mutase isoform 1 [Vitis vinifera]	gi|225439064,gi|239056191	61074.9	0.649	YENDWEVVK	45.4	42.2	9.48		591.277	1180.54	1181.55	2	-0.0007819	-0.6618	214	222	26
6626	183	PREDICTED: 2,3-bisphosphoglycerate-independent phosphoglycerate mutase isoform 1 [Vitis vinifera]	gi|225439064,gi|239056191	61074.9	0.649	YENDWEVVKR	62.7	45.1	11.4		669.332	1336.65	1337.65	2	0.007918	5.919	214	223	26
6626	183	PREDICTED: succinate dehydrogenase [ubiquinone] flavoprotein subunit 1, mitochondrial isoform 1 [Vitis vinifera]	gi|225430776	73642.3	0.121	AAIGELSK	45.1	46.5	2.71		394.728	787.441	788.451	2	-0.003242	-4.112	52	59	7
6626	183	PREDICTED: succinate dehydrogenase [ubiquinone] flavoprotein subunit 1, mitochondrial isoform 1 [Vitis vinifera]	gi|225430776	73642.3	0.121	AFGGQSLNFGK	60.7	44.1	10.6		563.289	1124.56	1125.57	2	0.001078	0.9578	196	206	7
6626	183	PREDICTED: succinate dehydrogenase [ubiquinone] flavoprotein subunit 1, mitochondrial isoform 1 [Vitis vinifera]	gi|225430776	73642.3	0.121	FQAASTILATGGYGR	83.2	44.3	13.1		756.896	1511.78	1512.78	2	0.005018	3.317	272	286	7
6626	183	PREDICTED: succinate dehydrogenase [ubiquinone] flavoprotein subunit 1, mitochondrial isoform 1 [Vitis vinifera]	gi|225430776	73642.3	0.121	HGVDTAGITELYR	39.6	45.1	9.64		477.911	1430.71	1431.72	3	-0.004398	-3.072	60	72	7
6626	183	PREDICTED: succinate dehydrogenase [ubiquinone] flavoprotein subunit 1, mitochondrial isoform 1 [Vitis vinifera]	gi|225430776	73642.3	0.121	LGANSLLDIVVFGR	121	43.2	11.9		737.423	1472.83	1473.84	2	-0.003282	-2.227	478	491	7
6626	183	PREDICTED: succinate dehydrogenase [ubiquinone] flavoprotein subunit 1, mitochondrial isoform 1 [Vitis vinifera]	gi|225430776	73642.3	0.121	TQETLEEGcK	56.9	40.9	10.3	c9: Carbamidomethyl (+57.02)	597.77	1193.52	1194.53	2	0.001013	0.8478	554	563	7
6626	183	PREDICTED: succinate dehydrogenase [ubiquinone] flavoprotein subunit 1, mitochondrial isoform 1 [Vitis vinifera]	gi|225430776	73642.3	0.121	VmQNNAAVFR	62.2	44.4	9.93	m2: Oxidation (+15.99)	583.291	1164.57	1165.58	2	-0.002637	-2.262	544	553	7
6626	183	hypothetical protein VITISV_036580 [Vitis vinifera]	gi|147823108	64978.2	0.138	EAQEGVAIEIAEAVVGALR	58.3	43.9	11.4		642.351	1924.03	1925.03	3	0.004622	2.401	353	371	7
6626	183	hypothetical protein VITISV_036580 [Vitis vinifera]	gi|147823108	64978.2	0.138	GGVIDEDALVR	34.2	44.4	4.37		572.305	1142.6	1143.6	2	0.002278	1.992	299	309	7
6626	183	hypothetical protein VITISV_036580 [Vitis vinifera]	gi|147823108	64978.2	0.138	LAVQLVAGGSGIK	60.6	41.2	9.17		606.869	1211.72	1212.73	2	-0.0002019	-0.1665	405	417	7
6626	183	hypothetical protein VITISV_036580 [Vitis vinifera]	gi|147823108	64978.2	0.138	LGEAGLEVLR	31.6	43.7	8.28		528.809	1055.6	1056.6	2	0.005998	5.677	91	100	7
6626	183	hypothetical protein VITISV_036580 [Vitis vinifera]	gi|147823108	64978.2	0.138	NVAQADASMK	52.1	44.1	0		517.751	1033.49	1034.49	2	0.002078	2.009	182	191	7
6626	183	hypothetical protein VITISV_036580 [Vitis vinifera]	gi|147823108	64978.2	0.138	QVQKPTVLVSEK	31.1	42.4	2.9		452.602	1354.78	1355.79	3	0.002152	1.587	79	90	7
6626	183	hypothetical protein VITISV_036580 [Vitis vinifera]	gi|147823108	64978.2	0.138	YVGVSLVGK	29.8	41	5.75		461.274	920.533	921.54	2	9.806e-05	0.1064	200	208	7
6626	183	unnamed protein product [Vitis vinifera]	gi|297745522,gi|359485890	80913.4	0.166	DVcTSEHQELAR	55.3	40.6	8.5	c3: Carbamidomethyl (+57.02)	482.221	1443.64	1444.65	3	0.0008568	0.5931	391	402	9
6626	183	unnamed protein product [Vitis vinifera]	gi|297745522,gi|359485890	80913.4	0.166	GGLVDESAVDK	64.5	44.2	8.25		545.271	1088.53	1089.54	2	-0.008502	-7.803	350	360	9
6626	183	unnamed protein product [Vitis vinifera]	gi|297745522,gi|359485890	80913.4	0.166	GLQQSDDGSPDR	72.9	38.8	10.9		637.784	1273.55	1274.56	2	-0.0003419	-0.2683	201	212	9
6626	183	unnamed protein product [Vitis vinifera]	gi|297745522,gi|359485890	80913.4	0.166	GQETPGEDPLLSSK	63.1	43.7	9.84		729.361	1456.71	1457.71	2	0.001938	1.33	180	193	9
6626	183	unnamed protein product [Vitis vinifera]	gi|297745522,gi|359485890	80913.4	0.166	GSLPLSPTAIK	40.8	39.5	5.16		542.324	1082.63	1083.64	2	-0.0006819	-0.6293	417	427	9
6626	183	unnamed protein product [Vitis vinifera]	gi|297745522,gi|359485890	80913.4	0.166	HYTAYDLDNWK	11.2	41	7.36		475.885	1424.63	1425.64	3	-0.004378	-3.071	221	231	9
6626	183	unnamed protein product [Vitis vinifera]	gi|297745522,gi|359485890	80913.4	0.166	QGIVLLK	34.5	39.1	2.97		385.76	769.505	770.514	2	-0.001202	-1.56	407	413	9
6626	183	unnamed protein product [Vitis vinifera]	gi|297745522,gi|359485890	80913.4	0.166	TMIGNYEGTPcK	89.6	39.7	0	c11: Carbamidomethyl (+57.02)	685.808	1369.6	1370.61	2	-0.0003272	-0.2388	441	452	9
6626	183	unnamed protein product [Vitis vinifera]	gi|297745522,gi|359485890	80913.4	0.166	YASGYVR	30.8	40.9	4.89		408.207	814.399	815.404	2	0.002278	2.794	194	200	9
6626	183	hypothetical protein VITISV_016119 [Vitis vinifera]	gi|147860393,gi|225436253	66883.4	0.207	AYLEFFcSR	40.3	43	8.16	c7: Carbamidomethyl (+57.02)	596.78	1191.55	1192.55	2	0.007873	6.602	468	476	11
6626	183	hypothetical protein VITISV_016119 [Vitis vinifera]	gi|147860393,gi|225436253	66883.4	0.207	FVNDcR	34.9	38.9	0.415	c5: Carbamidomethyl (+57.02)	405.681	809.347	810.356	2	-0.002447	-3.02	204	209	11
6626	183	hypothetical protein VITISV_016119 [Vitis vinifera]	gi|147860393,gi|225436253	66883.4	0.207	IDHALDTIK	20.2	41.9	9.3		513.284	1024.55	1025.56	2	-0.002562	-2.498	93	101	11
6626	183	hypothetical protein VITISV_016119 [Vitis vinifera]	gi|147860393,gi|225436253	66883.4	0.207	IINELLGNINSK	34	43	9.66		664.385	1326.76	1327.76	2	0.005178	3.9	423	434	11
6626	183	hypothetical protein VITISV_016119 [Vitis vinifera]	gi|147860393,gi|225436253	66883.4	0.207	IPSEVTAALEPIKDNDEAVK	29.1	44.7	8.87		713.712	2138.12	2139.12	3	0.004372	2.044	241	260	11
6626	183	hypothetical protein VITISV_016119 [Vitis vinifera]	gi|147860393,gi|225436253	66883.4	0.207	IRDAATEEGK	17.1	45.1	3.68		363.854	1088.54	1089.55	3	-0.005298	-4.863	7	16	11
6626	183	hypothetical protein VITISV_016119 [Vitis vinifera]	gi|147860393,gi|225436253	66883.4	0.207	LNALVDK	44.1	44.8	5.14		386.73	771.446	772.456	2	-0.003062	-3.964	479	485	11
6626	183	hypothetical protein VITISV_016119 [Vitis vinifera]	gi|147860393,gi|225436253	66883.4	0.207	LQDEWVVPLK	53.8	43.1	9.86		613.844	1225.67	1226.68	2	0.002058	1.678	380	389	11
6626	183	hypothetical protein VITISV_016119 [Vitis vinifera]	gi|147860393,gi|225436253	66883.4	0.207	SDSLSVGWGGPGGYVYQK	17.1	44.1	9.05		928.949	1855.88	1856.88	2	0.008658	4.663	450	467	11
6626	183	hypothetical protein VITISV_016119 [Vitis vinifera]	gi|147860393,gi|225436253	66883.4	0.207	TEDGVDNLFER	68.4	42.5	10.9		647.802	1293.59	1294.59	2	0.006058	4.679	28	38	11
6626	183	hypothetical protein VITISV_016119 [Vitis vinifera]	gi|147860393,gi|225436253	66883.4	0.207	TVHLYTLNMEK	46.5	45.8	0		450.238	1347.69	1348.69	3	0.005202	3.857	281	291	11
6626	183	PREDICTED: phosphoglucomutase, cytoplasmic [Vitis vinifera]	gi|225424316	63624.8	0.0515	LQSSLPEVNK	30	43.7	6.16		557.808	1113.6	1114.61	2	-0.002422	-2.173	468	477	3
6626	183	PREDICTED: phosphoglucomutase, cytoplasmic [Vitis vinifera]	gi|225424316	63624.8	0.0515	LSGTGSEGATIR	73.5	45.6	9.73		574.799	1147.58	1148.59	2	-0.0002219	-0.1932	525	536	3
6626	183	PREDICTED: phosphoglucomutase, cytoplasmic [Vitis vinifera]	gi|225424316	63624.8	0.0515	VYIEQYEK	36.3	42.7	5.95		536.271	1070.53	1071.54	2	-0.001002	-0.9351	537	544	3
7220	184	PREDICTED: L-ascorbate peroxidase 2, cytosolic [Vitis vinifera]	gi|225435177	27540.5	0.648	ALLSDPAFRPLVEK	61.5	42.6	9.95		519.299	1554.88	1555.88	3	-0.001998	-1.284	210	223	15
7220	184	PREDICTED: L-ascorbate peroxidase 2, cytosolic [Vitis vinifera]	gi|225435177	27540.5	0.648	DIVALSGAHTLGR	61.2	43.1	11		437.247	1308.72	1309.72	3	0.003432	2.62	155	167	15
7220	184	PREDICTED: L-ascorbate peroxidase 2, cytosolic [Vitis vinifera]	gi|225435177	27540.5	0.648	EDKPEPPPEGR	69	44.4	8		625.808	1249.6	1250.6	2	0.006618	5.292	120	130	15
7220	184	PREDICTED: L-ascorbate peroxidase 2, cytosolic [Vitis vinifera]	gi|225435177	27540.5	0.648	EGLLQLPSDK	82.1	43.5	9.26		550.307	1098.6	1099.6	2	0.006718	6.11	200	209	15
7220	184	PREDICTED: L-ascorbate peroxidase 2, cytosolic [Vitis vinifera]	gi|225435177	27540.5	0.648	GcDHLR	41	36.1	1.85	c2: Carbamidomethyl (+57.02)	379.174	756.333	757.341	2	-0.0004072	-0.5377	137	142	15
7220	184	PREDICTED: L-ascorbate peroxidase 2, cytosolic [Vitis vinifera]	gi|225435177	27540.5	0.648	IAWHSAGTFDVK	62.8	45	10.9		666.342	1330.67	1331.67	2	0.002698	2.026	39	50	15
7220	184	PREDICTED: L-ascorbate peroxidase 2, cytosolic [Vitis vinifera]	gi|225435177	27540.5	0.648	KPEELAHGANNGLDIAVR	67.9	45.6	9.09		635.333	1902.98	1904	3	-0.01441	-7.567	62	79	15
7220	184	PREDICTED: L-ascorbate peroxidase 2, cytosolic [Vitis vinifera]	gi|225435177	27540.5	0.648	NcAPIMLR	36.2	43.3	0	c2: Carbamidomethyl (+57.02)	487.749	973.484	974.491	2	-0.0001472	-0.1511	31	38	15
7220	184	PREDICTED: L-ascorbate peroxidase 2, cytosolic [Vitis vinifera]	gi|225435177	27540.5	0.648	QVFVTQMGLSDK	79.7	45	0		676.85	1351.68	1352.69	2	0.004058	3	143	154	15
7220	184	PREDICTED: L-ascorbate peroxidase 2, cytosolic [Vitis vinifera]	gi|225435177	27540.5	0.648	QVFVTQmGLSDKDIVALSGAHTLGR	123	44.3	12.1	m7: Oxidation (+15.99)	887.136	2658.39	2659.39	3	0.006727	2.53	143	167	15
7220	184	PREDICTED: L-ascorbate peroxidase 2, cytosolic [Vitis vinifera]	gi|225435177	27540.5	0.648	SYPTVSEEYK	42.5	41.2	7.55		601.783	1201.55	1202.56	2	0.001738	1.445	4	13	15
7220	184	PREDICTED: L-ascorbate peroxidase 2, cytosolic [Vitis vinifera]	gi|225435177	27540.5	0.648	SYPTVSEEYKK	47	43.8	8.9		665.832	1329.65	1330.65	2	0.003898	2.929	4	14	15
7220	184	PREDICTED: L-ascorbate peroxidase 2, cytosolic [Vitis vinifera]	gi|225435177	27540.5	0.648	TGGPFGTMK	65.5	43.2	0		448.22	894.425	895.434	2	-0.001882	-2.102	53	61	15
7220	184	PREDICTED: L-ascorbate peroxidase 2, cytosolic [Vitis vinifera]	gi|225435177	27540.5	0.648	YAADEDAFFEDYK	61.9	36	11.7		792.333	1582.65	1583.65	2	0.004238	2.676	224	236	15
7220	184	PREDICTED: L-ascorbate peroxidase 2, cytosolic [Vitis vinifera]	gi|225435177	27540.5	0.648	YAADEDAFFEDYKEAHLK	71.8	40.6	11.9		721.326	2160.96	2161.97	3	-0.008358	-3.866	224	241	15
7220	184	hypothetical protein VITISV_041523 [Vitis vinifera]	gi|147784332,gi|225449541	27179.4	0.193	ESGSTmEVVAAQTK	52.7	43.2	7.52	m6: Oxidation (+15.99)	727.344	1452.67	1453.68	2	-0.003337	-2.296	136	149	4
7220	184	hypothetical protein VITISV_041523 [Vitis vinifera]	gi|147784332,gi|225449541	27179.4	0.193	IIYGGSVSGANcK	76.2	44.4	9.94	c12: Carbamidomethyl (+57.02)	663.327	1324.64	1325.65	2	-0.004927	-3.717	207	219	4
7220	184	hypothetical protein VITISV_041523 [Vitis vinifera]	gi|147784332,gi|225449541	27179.4	0.193	VATPAQAQEVHSELR	39.2	45.5	8.48		545.953	1634.84	1635.84	3	0.0001021	0.06239	176	190	4
7220	184	hypothetical protein VITISV_041523 [Vitis vinifera]	gi|147784332,gi|225449541	27179.4	0.193	VAYALSK	28.2	42.2	4.83		376.221	750.427	751.435	2	-0.0004219	-0.5615	114	120	4
7220	184	PREDICTED: uncharacterized protein DDB_G0288155 isoform 1 [Vitis vinifera]	gi|225458237	29553	0.195	ETPPELILPDNILPDK	1.41	43.9	7.49		601.999	1802.98	1803.97	3	0.008822	4.89	251	266	3
7220	184	PREDICTED: uncharacterized protein DDB_G0288155 isoform 1 [Vitis vinifera]	gi|225458237	29553	0.195	GDVNSISVGSGTNIQDNSLVHVAK	39.3	45.2	10.8		804.407	2410.2	2411.22	3	-0.01034	-4.287	87	110	3
7220	184	PREDICTED: uncharacterized protein DDB_G0288155 isoform 1 [Vitis vinifera]	gi|225458237	29553	0.195	IPcGEVWGGNPAK	53.7	43.8	9.33	c3: Carbamidomethyl (+57.02)	692.837	1383.66	1384.67	2	-0.002027	-1.464	175	187	3
7220	184	PREDICTED: GTP-binding nuclear protein Ran-3-like [Vitis vinifera]	gi|225430202,gi|225430204,gi|225442825,gi|296081995,gi|296081996,gi|297738907,gi|297743387	25066.7	0.131	LVIVGDGGTGK	34.8	44.7	8.07		508.291	1014.57	1015.58	2	-0.003282	-3.232	16	26	2
7220	184	PREDICTED: GTP-binding nuclear protein Ran-3-like [Vitis vinifera]	gi|225430202,gi|225430204,gi|225442825,gi|296081995,gi|296081996,gi|297738907,gi|297743387	25066.7	0.131	NLQYYEISAK	30.3	44	8.59		614.816	1227.62	1228.62	2	0.004438	3.612	146	155	2
7220	184	PREDICTED: 3-oxoacyl-[acyl-carrier-protein] reductase, chloroplastic [Vitis vinifera]	gi|225425854	33968	0.245	AGVIGLTK	55.2	44.4	4.05		379.744	757.473	758.477	2	0.003378	4.454	242	249	7
7220	184	PREDICTED: 3-oxoacyl-[acyl-carrier-protein] reductase, chloroplastic [Vitis vinifera]	gi|225425854	33968	0.245	AIALALGK	45.4	39.5	4.95		378.752	755.489	756.498	2	-0.001602	-2.118	102	109	7
7220	184	PREDICTED: 3-oxoacyl-[acyl-carrier-protein] reductase, chloroplastic [Vitis vinifera]	gi|225425854	33968	0.245	IINIASVVGLVGNVGQANYSAAK	80.2	41.4	11.4		753.423	2257.25	2258.25	3	0.002482	1.099	219	241	7
7220	184	PREDICTED: 3-oxoacyl-[acyl-carrier-protein] reductase, chloroplastic [Vitis vinifera]	gi|225425854	33968	0.245	ILETIPLGR	38.3	38.9	3.78		506.315	1010.62	1011.62	2	0.003398	3.359	286	294	7
7220	184	PREDICTED: 3-oxoacyl-[acyl-carrier-protein] reductase, chloroplastic [Vitis vinifera]	gi|225425854	33968	0.245	LGEDIEK	38.4	43.7	4.06		402.211	802.407	803.415	2	-0.0006219	-0.7741	278	284	7
7220	184	PREDICTED: 3-oxoacyl-[acyl-carrier-protein] reductase, chloroplastic [Vitis vinifera]	gi|225425854	33968	0.245	NINVNAVAPGFIASDMTAK	72.6	45.6	0		645	1931.98	1932.98	3	0.0003621	0.1873	259	277	7
7220	184	PREDICTED: 3-oxoacyl-[acyl-carrier-protein] reductase, chloroplastic [Vitis vinifera]	gi|225425854	33968	0.245	VLVNYAR	30.6	45.1	3.2		417.743	833.472	834.483	2	-0.004022	-4.82	114	120	7
7220	184	PREDICTED: 3-oxoacyl-[acyl-carrier-protein] reductase 1, chloroplastic [Vitis vinifera]	gi|225456248	34339.8	0.248	AGVIGLTK	55.2	44.4	4.05		379.744	757.473	758.477	2	0.003378	4.454	239	246	7
7220	184	PREDICTED: 3-oxoacyl-[acyl-carrier-protein] reductase 1, chloroplastic [Vitis vinifera]	gi|225456248	34339.8	0.248	AIALALGK	45.4	39.5	4.95		378.752	755.489	756.498	2	-0.001602	-2.118	99	106	7
7220	184	PREDICTED: 3-oxoacyl-[acyl-carrier-protein] reductase 1, chloroplastic [Vitis vinifera]	gi|225456248	34339.8	0.248	IINISSVVGLVGNVGQANYSAAK	60	42.6	10.7		758.752	2273.23	2274.25	3	-0.004188	-1.841	216	238	7
7220	184	PREDICTED: 3-oxoacyl-[acyl-carrier-protein] reductase 1, chloroplastic [Vitis vinifera]	gi|225456248	34339.8	0.248	ILGTIPLGR	47.9	37.1	7.73		470.306	938.598	939.599	2	0.006378	6.788	283	291	7
7220	184	PREDICTED: 3-oxoacyl-[acyl-carrier-protein] reductase 1, chloroplastic [Vitis vinifera]	gi|225456248	34339.8	0.248	LGEDIEK	38.4	43.7	4.06		402.211	802.407	803.415	2	-0.0006219	-0.7741	275	281	7
7220	184	PREDICTED: 3-oxoacyl-[acyl-carrier-protein] reductase 1, chloroplastic [Vitis vinifera]	gi|225456248	34339.8	0.248	NINVNAVAPGFIASDMTAK	72.6	45.6	0		645	1931.98	1932.98	3	0.0003621	0.1873	256	274	7
7220	184	PREDICTED: 3-oxoacyl-[acyl-carrier-protein] reductase 1, chloroplastic [Vitis vinifera]	gi|225456248	34339.8	0.248	VLVNYAR	30.6	45.1	3.2		417.743	833.472	834.483	2	-0.004022	-4.82	111	117	7
7220	184	PREDICTED: 2,3-bisphosphoglycerate-independent phosphoglycerate mutase isoform 1 [Vitis vinifera]	gi|225439064,gi|239056191	61074.9	0.175	GWDAQVLGEAPHK	58.5	45	10.4		469.905	1406.69	1407.7	3	-0.001298	-0.922	224	236	6
7220	184	PREDICTED: 2,3-bisphosphoglycerate-independent phosphoglycerate mutase isoform 1 [Vitis vinifera]	gi|225439064,gi|239056191	61074.9	0.175	IDQLQLLLK	57.2	40.2	10.9		542.338	1082.66	1083.68	2	-0.008562	-7.901	143	151	6
7220	184	PREDICTED: 2,3-bisphosphoglycerate-independent phosphoglycerate mutase isoform 1 [Vitis vinifera]	gi|225439064,gi|239056191	61074.9	0.175	IHYAGMLQYDGELK	35.3	44.6	0		546.605	1636.79	1637.8	3	0.001032	0.6301	313	326	6
7220	184	PREDICTED: 2,3-bisphosphoglycerate-independent phosphoglycerate mutase isoform 1 [Vitis vinifera]	gi|225439064,gi|239056191	61074.9	0.175	IILDAIEQVGGIYVVTADHGNAEDMVK	76	44.8	0		957.496	2869.47	2870.46	3	0.01374	4.787	454	480	6
7220	184	PREDICTED: 2,3-bisphosphoglycerate-independent phosphoglycerate mutase isoform 1 [Vitis vinifera]	gi|225439064,gi|239056191	61074.9	0.175	SLEYEDFDKFDR	54.4	39.8	11.5		521.903	1562.69	1563.7	3	-0.002108	-1.348	296	307	6
7220	184	PREDICTED: 2,3-bisphosphoglycerate-independent phosphoglycerate mutase isoform 1 [Vitis vinifera]	gi|225439064,gi|239056191	61074.9	0.175	VNLPNGDmVGHTGDIEATIVAcK	30.8	44.3	9.04	m8: Oxidation (+15.99), c22: Carbamidomethyl (+57.02)	809.723	2426.15	2427.16	3	-0.0109	-4.49	424	446	6
7220	184	RecName: Full=S-adenosylmethionine synthase 2; Short=AdoMet synthase 2; AltName: Full=Methionine adenosyltransferase 2; Short=MAT 2	gi|223635284	43095.8	0.0687	TNMVMVFGEITTK	54.7	44.6	0		735.877	1469.74	1470.73	2	0.01358	9.232	48	60	2
7220	184	RecName: Full=S-adenosylmethionine synthase 2; Short=AdoMet synthase 2; AltName: Full=Methionine adenosyltransferase 2; Short=MAT 2	gi|223635284	43095.8	0.0687	TQVTVEYHNDGGAR	24.4	42.8	7.8		516.245	1545.71	1546.72	3	-0.003048	-1.971	170	183	2
7220	184	PREDICTED: succinate dehydrogenase [ubiquinone] flavoprotein subunit 1, mitochondrial isoform 1 [Vitis vinifera]	gi|225430776	73642.3	0.0478	AAIGLSEHGFNTAcITK	27.7	45.4	7.96	c14: Carbamidomethyl (+57.02)	597.302	1788.89	1789.89	3	0.002397	1.339	100	116	2
7220	184	PREDICTED: succinate dehydrogenase [ubiquinone] flavoprotein subunit 1, mitochondrial isoform 1 [Vitis vinifera]	gi|225430776	73642.3	0.0478	FQAASTILATGGYGR	72	44.5	12.7		756.894	1511.77	1512.78	2	0.0009781	0.6465	272	286	2
7220	184	PREDICTED: protein SEC13 homolog [Vitis vinifera]	gi|225452646	32701.5	0.0731	LVSGGcDNTVK	25.5	43.8	6.57	c6: Carbamidomethyl (+57.02)	575.282	1148.55	1149.56	2	-0.001147	-0.998	178	188	2
7220	184	PREDICTED: protein SEC13 homolog [Vitis vinifera]	gi|225452646	32701.5	0.0731	VATASSDTTIK	66.4	45.1	8.9		547.289	1092.56	1093.57	2	-0.003442	-3.147	26	36	2
7220	184	PREDICTED: glyceraldehyde-3-phosphate dehydrogenase-like [Vitis vinifera]	gi|225425884,gi|297738348	36741.4	0.0944	AASFNIIPSSTGAAK	34.8	45.7	11.1		717.882	1433.75	1434.76	2	-0.001442	-1.005	206	220	3
7220	184	PREDICTED: glyceraldehyde-3-phosphate dehydrogenase-like [Vitis vinifera]	gi|225425884,gi|297738348	36741.4	0.0944	AGIALNANFLK	31.1	43.6	8.35		566.328	1130.64	1131.65	2	-0.002362	-2.087	304	314	3
7220	184	PREDICTED: glyceraldehyde-3-phosphate dehydrogenase-like [Vitis vinifera]	gi|225425884,gi|297738348	36741.4	0.0944	VIDLIR	42.3	43.2	-0.553		364.737	727.46	728.467	2	0.0005981	0.821	329	334	3
1013	185	PREDICTED: ruBisCO large subunit-binding protein subunit alpha, chloroplastic-like [Vitis vinifera]	gi|359479362	61967	0.0375	SPLLIVAEDVTGEALATLVVNK	88.3	39.5	12.6		751.43	2251.27	2252.28	3	0.0007321	0.325	289	310	1
1013	185	PREDICTED: actin-depolymerizing factor 2-like isoform 1 [Vitis vinifera]	gi|225435040,gi|225449595,gi|225454162,gi|296086270,gi|297745256,gi|297746121,gi|359486829	16008.5	0.137	IFFIAWSPDTSR	22.9	44.3	5.57		720.371	1438.73	1439.73	2	0.002478	1.721	85	96	2
1013	185	PREDICTED: actin-depolymerizing factor 2-like isoform 1 [Vitis vinifera]	gi|225435040,gi|225449595,gi|225454162,gi|296086270,gi|297745256,gi|297746121,gi|359486829	16008.5	0.137	MIYASSK	41.8	41.7	0		400.203	798.391	799.402	2	-0.003542	-4.431	101	107	2
1013	185	PREDICTED: 2,3-bisphosphoglycerate-independent phosphoglycerate mutase isoform 1 [Vitis vinifera]	gi|225439064,gi|239056191	61074.9	0.0733	IHYAGMLQYDGELK	33.2	44.8	0		546.606	1636.79	1637.8	3	0.002442	1.491	313	326	2
1013	185	PREDICTED: 2,3-bisphosphoglycerate-independent phosphoglycerate mutase isoform 1 [Vitis vinifera]	gi|225439064,gi|239056191	61074.9	0.0733	IILDAIEQVGGIYVVTADHGNAEDMVK	89.4	44.8	0		957.496	2869.47	2870.46	3	0.0138	4.808	454	480	2
1013	185	PREDICTED: uncharacterized protein LOC100251175 isoform 1 [Vitis vinifera]	gi|225432248	18948	0.521	DGATDPTFLYFGHGLK	77.8	44.6	9.03		580.287	1737.84	1738.84	3	0.002632	1.514	148	163	9
1013	185	PREDICTED: uncharacterized protein LOC100251175 isoform 1 [Vitis vinifera]	gi|225432248	18948	0.521	ELFNGALWEVEGK	58.8	45.6	11.8		746.384	1490.75	1491.75	2	0.01194	8.003	22	34	9
1013	185	PREDICTED: uncharacterized protein LOC100251175 isoform 1 [Vitis vinifera]	gi|225432248	18948	0.521	LEGEKQEEFK	36.2	45	9.42		618.81	1235.61	1236.61	2	0.002318	1.875	101	110	9
1013	185	PREDICTED: uncharacterized protein LOC100251175 isoform 1 [Vitis vinifera]	gi|225432248	18948	0.521	LEGEKQEEFKK	21	45.8	4.55		455.573	1363.7	1364.71	3	-0.001218	-0.8925	101	111	9
1013	185	PREDICTED: uncharacterized protein LOC100251175 isoform 1 [Vitis vinifera]	gi|225432248	18948	0.521	LQEQPPFDK	44	43.6	6.82		551.281	1100.55	1101.56	2	-0.003282	-2.979	75	83	9
1013	185	PREDICTED: uncharacterized protein LOC100251175 isoform 1 [Vitis vinifera]	gi|225432248	18948	0.521	LQEQPPFDKK	57.4	45.3	9.39		615.328	1228.64	1229.65	2	-0.003642	-2.962	75	84	9
1013	185	PREDICTED: uncharacterized protein LOC100251175 isoform 1 [Vitis vinifera]	gi|225432248	18948	0.521	mLVYQDLLTADELLSDSFPYK	144	45.4	0	m1: Oxidation (+15.99)	1239.12	2476.23	2477.22	2	0.02338	9.439	1	21	9
1013	185	PREDICTED: uncharacterized protein LOC100251175 isoform 1 [Vitis vinifera]	gi|225432248	18948	0.521	QFVTYmK	36.9	43.5	5.39	m6: Oxidation (+15.99)	466.729	931.443	932.455	2	-0.004757	-5.102	85	91	9
1013	185	PREDICTED: uncharacterized protein LOC100251175 isoform 1 [Vitis vinifera]	gi|225432248	18948	0.521	VVDIVDTFR	59.9	45.2	9.39		532.289	1062.56	1063.58	2	-0.008422	-7.919	66	74	9
5628	186	PREDICTED: heat shock 70 kDa protein, mitochondrial-like [Vitis vinifera]	gi|225429228	72753.2	0.417	AmSGDNIEEIK	50.7	41.8	8.08	m2: Oxidation (+15.99)	611.784	1221.55	1222.56	2	-0.001437	-1.175	622	632	27
5628	186	PREDICTED: heat shock 70 kDa protein, mitochondrial-like [Vitis vinifera]	gi|225429228	72753.2	0.417	DKIPSEVATEIESAVADLR	90.2	44.8	13.2		681.696	2042.07	2043.06	3	0.01379	6.751	602	620	27
5628	186	PREDICTED: heat shock 70 kDa protein, mitochondrial-like [Vitis vinifera]	gi|225429228	72753.2	0.417	EQQITIR	41.1	47.3	0.707		444.252	886.49	887.495	2	0.002898	3.265	543	549	27
5628	186	PREDICTED: heat shock 70 kDa protein, mitochondrial-like [Vitis vinifera]	gi|225429228	72753.2	0.417	ETAESYLGK	52.4	42.6	7.57		499.245	996.476	997.484	2	-0.0006419	-0.6436	178	186	27
5628	186	PREDICTED: heat shock 70 kDa protein, mitochondrial-like [Vitis vinifera]	gi|225429228	72753.2	0.417	EVDEVLLVGGMTR	40.6	45.7	0		473.252	1416.73	1417.74	3	0.005822	4.107	380	392	27
5628	186	PREDICTED: heat shock 70 kDa protein, mitochondrial-like [Vitis vinifera]	gi|225429228	72753.2	0.417	FDDPQTQK	29.9	42.5	4		489.731	977.447	978.453	2	0.001878	1.919	130	137	27
5628	186	PREDICTED: heat shock 70 kDa protein, mitochondrial-like [Vitis vinifera]	gi|225429228	72753.2	0.417	FESLVNHLIER	75	44	11.3		678.871	1355.73	1356.73	2	0.007478	5.512	352	362	27
5628	186	PREDICTED: heat shock 70 kDa protein, mitochondrial-like [Vitis vinifera]	gi|225429228	72753.2	0.417	GELLVGTPAK	51.1	41.1	9.58		492.79	983.565	984.573	2	-0.0003219	-0.327	99	108	27
5628	186	PREDICTED: heat shock 70 kDa protein, mitochondrial-like [Vitis vinifera]	gi|225429228	72753.2	0.417	GVNPDEAVAmGAAIQGGILR	80	45.3	10.2	m10: Oxidation (+15.99)	978.003	1953.99	1955	2	-0.004117	-2.106	411	430	27
5628	186	PREDICTED: heat shock 70 kDa protein, mitochondrial-like [Vitis vinifera]	gi|225429228	72753.2	0.417	HLNITLTR	35	40.3	3.8		484.292	966.57	967.568	2	0.008838	9.134	342	349	27
5628	186	PREDICTED: heat shock 70 kDa protein, mitochondrial-like [Vitis vinifera]	gi|225429228	72753.2	0.417	IELSSTSQTEINLPFITADASGAK	26.3	44.8	11.8		831.769	2492.28	2493.27	3	0.01952	7.83	318	341	27
5628	186	PREDICTED: heat shock 70 kDa protein, mitochondrial-like [Vitis vinifera]	gi|225429228	72753.2	0.417	IINEPTAAALSYGLNNK	76.8	45	9.89		596.99	1787.95	1788.95	3	0.004862	2.718	221	237	27
5628	186	PREDICTED: heat shock 70 kDa protein, mitochondrial-like [Vitis vinifera]	gi|225429228	72753.2	0.417	IPSEVATEIESAVADLR	66.2	44.8	12.1		900.474	1798.93	1799.94	2	0.001678	0.9323	604	620	27
5628	186	PREDICTED: heat shock 70 kDa protein, mitochondrial-like [Vitis vinifera]	gi|225429228	72753.2	0.417	ISGLDVQR	57.8	47.3	8.23		444.253	886.49	887.495	2	0.003178	3.581	213	220	27
5628	186	PREDICTED: heat shock 70 kDa protein, mitochondrial-like [Vitis vinifera]	gi|225429228	72753.2	0.417	KAmSGDNIEEIK	32.6	44.6	8.22	m3: Oxidation (+15.99)	675.832	1349.65	1350.66	2	-0.001417	-1.049	621	632	27
5628	186	PREDICTED: heat shock 70 kDa protein, mitochondrial-like [Vitis vinifera]	gi|225429228	72753.2	0.417	mKETAESYLGK	71.2	43	11.7	m1: Oxidation (+15.99)	636.813	1271.61	1272.61	2	0.005563	4.371	176	186	27
5628	186	PREDICTED: heat shock 70 kDa protein, mitochondrial-like [Vitis vinifera]	gi|225429228	72753.2	0.417	NSADTTIYSVEK	96.2	43.1	11.7		664.323	1326.63	1327.64	2	0.001498	1.128	584	595	27
5628	186	PREDICTED: heat shock 70 kDa protein, mitochondrial-like [Vitis vinifera]	gi|225429228	72753.2	0.417	NTTIPTK	49.2	45.8	0.709		387.722	773.43	774.436	2	0.001598	2.064	462	468	27
5628	186	PREDICTED: heat shock 70 kDa protein, mitochondrial-like [Vitis vinifera]	gi|225429228	72753.2	0.417	QAVTNPTNTVFGTK	79.1	45.7	12.8		739.385	1476.76	1477.76	2	-0.002122	-1.436	110	123	27
5628	186	PREDICTED: heat shock 70 kDa protein, mitochondrial-like [Vitis vinifera]	gi|225429228	72753.2	0.417	RFDDPQTQK	28.9	44.5	6.71		567.78	1133.55	1134.55	2	-0.001382	-1.218	129	137	27
5628	186	PREDICTED: heat shock 70 kDa protein, mitochondrial-like [Vitis vinifera]	gi|225429228	72753.2	0.417	SLGEYR	55.8	43	0.891		362.686	723.357	724.362	2	0.001758	2.427	596	601	27
5628	186	PREDICTED: heat shock 70 kDa protein, mitochondrial-like [Vitis vinifera]	gi|225429228	72753.2	0.417	SQVFSTAADNQTQVGIK	113	45.3	14.3		897.452	1792.89	1793.9	2	-0.005962	-3.323	470	486	27
5628	186	PREDICTED: heat shock 70 kDa protein, mitochondrial-like [Vitis vinifera]	gi|225429228	72753.2	0.417	SSGGLSEDEIEK	78.8	42.1	10.1		625.79	1249.57	1250.57	2	-0.002302	-1.841	550	561	27
5628	186	PREDICTED: heat shock 70 kDa protein, mitochondrial-like [Vitis vinifera]	gi|225429228	72753.2	0.417	TEGIDLSK	45.4	45.9	5.87		431.729	861.444	862.452	2	-8.194e-05	-0.09501	294	301	27
5628	186	PREDICTED: heat shock 70 kDa protein, mitochondrial-like [Vitis vinifera]	gi|225429228	72753.2	0.417	TEGIDLSKDR	62.2	45.4	9.61		378.531	1132.57	1133.58	3	3.206e-05	0.02828	294	303	27
5628	186	PREDICTED: heat shock 70 kDa protein, mitochondrial-like [Vitis vinifera]	gi|225429228	72753.2	0.417	TTPSVVAFNQK	60.2	45.4	10.3		596.326	1190.64	1191.64	2	0.007658	6.426	88	98	27
5628	186	PREDICTED: heat shock 70 kDa protein, mitochondrial-like [Vitis vinifera]	gi|225429228	72753.2	0.417	VQEVVSEIFGK	49	44.9	6.8		412.23	1233.67	1234.67	3	0.007722	6.254	396	406	27
5628	186	hypothetical protein VITISV_032193 [Vitis vinifera]	gi|147840634,gi|359476715	62771.4	0.131	ELLESFGPLR	48.9	45.2	7.21		580.823	1159.63	1160.63	2	0.008398	7.236	369	378	6
5628	186	hypothetical protein VITISV_032193 [Vitis vinifera]	gi|147840634,gi|359476715	62771.4	0.131	FAFVEmR	29.4	40.1	1.73	m6: Oxidation (+15.99)	458.225	914.436	915.439	2	0.004143	4.526	280	286	6
5628	186	hypothetical protein VITISV_032193 [Vitis vinifera]	gi|147840634,gi|359476715	62771.4	0.131	GSSHGGPDDYSDSK	25.2	32	5.32		470.191	1407.55	1408.56	3	-0.001878	-1.333	28	41	6
5628	186	hypothetical protein VITISV_032193 [Vitis vinifera]	gi|147840634,gi|359476715	62771.4	0.131	IFVGGLPYYFTEAQIR	14.1	45.3	4.47		625.327	1872.96	1873.98	3	-0.01801	-9.61	353	368	6
5628	186	hypothetical protein VITISV_032193 [Vitis vinifera]	gi|147840634,gi|359476715	62771.4	0.131	KFDGNQVVAVFYPENK	48.2	45.4	10.3		618.984	1853.93	1854.94	3	0.0001321	0.07119	542	557	6
5628	186	hypothetical protein VITISV_032193 [Vitis vinifera]	gi|147840634,gi|359476715	62771.4	0.131	LmFQPGALATK	16	45	5.48	m2: Oxidation (+15.99)	596.824	1191.63	1192.64	2	0.001723	1.445	454	464	6
5628	186	PREDICTED: lysosomal alpha-mannosidase [Vitis vinifera]	gi|225456481	112420	0.0932	IDYQDR	35.7	42.9	-0.215		405.197	808.379	809.379	2	0.006838	8.448	196	201	10
5628	186	PREDICTED: lysosomal alpha-mannosidase [Vitis vinifera]	gi|225456481	112420	0.0932	IPVLSENVVVR	52	39.2	9.49		612.871	1223.73	1224.73	2	0.003458	2.824	503	513	10
5628	186	PREDICTED: lysosomal alpha-mannosidase [Vitis vinifera]	gi|225456481	112420	0.0932	LFDYNVPDR	40	43.4	6.34		569.781	1137.55	1138.55	2	0.001738	1.527	259	267	10
5628	186	PREDICTED: lysosomal alpha-mannosidase [Vitis vinifera]	gi|225456481	112420	0.0932	LIHYVNLDGR	46.7	44	5.85		400.557	1198.65	1199.65	3	0.001942	1.619	310	319	10
5628	186	PREDICTED: lysosomal alpha-mannosidase [Vitis vinifera]	gi|225456481	112420	0.0932	LSIGYK	41	41.5	2.01		340.703	679.392	680.398	2	0.001518	2.231	431	436	10
5628	186	PREDICTED: lysosomal alpha-mannosidase [Vitis vinifera]	gi|225456481	112420	0.0932	NEFNLTPR	37	45.2	4.64		495.753	989.491	990.5	2	-0.001702	-1.718	157	164	10
5628	186	PREDICTED: lysosomal alpha-mannosidase [Vitis vinifera]	gi|225456481	112420	0.0932	QHVSDDYAK	55.6	40.1	8.42		531.744	1061.47	1062.49	2	-0.004442	-4.181	421	429	10
5628	186	PREDICTED: lysosomal alpha-mannosidase [Vitis vinifera]	gi|225456481	112420	0.0932	SLEVIWQGSR	47.6	45.3	11		587.813	1173.61	1174.62	2	-0.002422	-2.062	209	218	10
5628	186	PREDICTED: lysosomal alpha-mannosidase [Vitis vinifera]	gi|225456481	112420	0.0932	TDDYFPYADR	21.2	35.7	7.62		631.768	1261.52	1262.53	2	-0.004422	-3.502	345	354	10
5628	186	PREDICTED: lysosomal alpha-mannosidase [Vitis vinifera]	gi|225456481	112420	0.0932	VNALYSTPSIYTDAK	41.5	44.8	11.1		548.282	1641.82	1642.83	3	-0.001138	-0.6927	320	334	10
5628	186	PREDICTED: caffeic acid 3-O-methyltransferase 1-like isoform 1 [Vitis vinifera]	gi|359490763,gi|359490765	39485.7	0.0659	ILEAYK	25.8	40.7	-0.45		368.717	735.419	736.424	2	0.001798	2.442	190	195	3
5628	186	PREDICTED: caffeic acid 3-O-methyltransferase 1-like isoform 1 [Vitis vinifera]	gi|359490763,gi|359490765	39485.7	0.0659	LLATYAVVK	32.5	37.8	7.87		489.307	976.598	977.603	2	0.002678	2.739	82	90	3
5628	186	PREDICTED: caffeic acid 3-O-methyltransferase 1-like isoform 1 [Vitis vinifera]	gi|359490763,gi|359490765	39485.7	0.0659	LYGLAPVcK	51.9	45.5	6.3	c8: Carbamidomethyl (+57.02)	510.781	1019.55	1020.55	2	0.0008728	0.8552	104	112	3
5628	186	PREDICTED: 2,3-bisphosphoglycerate-independent phosphoglycerate mutase isoform 1 [Vitis vinifera]	gi|225439064,gi|239056191	61074.9	0.222	GVDAQIASGGGR	51.7	44.4	12		544.28	1086.55	1087.55	2	0.004278	3.934	195	206	8
5628	186	PREDICTED: 2,3-bisphosphoglycerate-independent phosphoglycerate mutase isoform 1 [Vitis vinifera]	gi|225439064,gi|239056191	61074.9	0.222	GWDAQVLGEAPHK	42.7	45.4	10.8		469.906	1406.7	1407.7	3	0.0007121	0.5058	224	236	8
5628	186	PREDICTED: 2,3-bisphosphoglycerate-independent phosphoglycerate mutase isoform 1 [Vitis vinifera]	gi|225439064,gi|239056191	61074.9	0.222	IYEGEGFK	42.8	41.7	5.43		471.731	941.448	942.457	2	-0.001322	-1.403	110	117	8
5628	186	PREDICTED: 2,3-bisphosphoglycerate-independent phosphoglycerate mutase isoform 1 [Vitis vinifera]	gi|225439064,gi|239056191	61074.9	0.222	LPNHYLVSPPEIER	57	45.1	10.9		555.299	1662.88	1663.88	3	0.002042	1.227	327	340	8
5628	186	PREDICTED: 2,3-bisphosphoglycerate-independent phosphoglycerate mutase isoform 1 [Vitis vinifera]	gi|225439064,gi|239056191	61074.9	0.222	SGQPLLDK	31.4	41.7	2.29		429.24	856.466	857.473	2	0.0006981	0.8141	484	491	8
5628	186	PREDICTED: 2,3-bisphosphoglycerate-independent phosphoglycerate mutase isoform 1 [Vitis vinifera]	gi|225439064,gi|239056191	61074.9	0.222	SLEYEDFDKFDR	59.8	40.8	10.5		521.905	1562.69	1563.7	3	0.003982	2.547	296	307	8
5628	186	PREDICTED: 2,3-bisphosphoglycerate-independent phosphoglycerate mutase isoform 1 [Vitis vinifera]	gi|225439064,gi|239056191	61074.9	0.222	TFAcSETVK	28.5	41.5	4.27	c4: Carbamidomethyl (+57.02)	521.746	1041.48	1042.49	2	-0.002327	-2.232	353	361	8
5628	186	PREDICTED: 2,3-bisphosphoglycerate-independent phosphoglycerate mutase isoform 1 [Vitis vinifera]	gi|225439064,gi|239056191	61074.9	0.222	YENDWEVVK	31.3	43	7.02		591.279	1180.54	1181.55	2	0.003298	2.791	214	222	8
5628	186	RecName: Full=Ribulose bisphosphate carboxylase large chain; Short=RuBisCO large subunit; Flags: Precursor	gi|115311623,gi|147769051,gi|46275228	52501.5	0.0421	EGNEIIR	31.6	43.1	1.66		415.721	829.428	830.437	2	-0.001102	-1.327	440	446	2
5628	186	RecName: Full=Ribulose bisphosphate carboxylase large chain; Short=RuBisCO large subunit; Flags: Precursor	gi|115311623,gi|147769051,gi|46275228	52501.5	0.0421	TFQGPPHGIQVER	60	45.6	9.86		489.256	1464.75	1465.75	3	-0.002058	-1.404	147	159	2
5628	186	hypothetical protein VITISV_000978 [Vitis vinifera]	gi|147797811,gi|225459844	71102.4	0.104	DGSALQLTAVDGR	34.8	45.4	10.5		651.835	1301.66	1302.66	2	-0.001562	-1.199	148	160	7
5628	186	hypothetical protein VITISV_000978 [Vitis vinifera]	gi|147797811,gi|225459844	71102.4	0.104	EISKDEISDALER	55.1	45.3	5.67		502.254	1503.74	1504.75	3	-0.002358	-1.567	436	448	7
5628	186	hypothetical protein VITISV_000978 [Vitis vinifera]	gi|147797811,gi|225459844	71102.4	0.104	ISIIPR	27.8	37.4	1.74		349.732	697.45	698.456	2	0.001558	2.231	491	496	7
5628	186	hypothetical protein VITISV_000978 [Vitis vinifera]	gi|147797811,gi|225459844	71102.4	0.104	LAQLLIEK	53.2	38.9	10.7		464.298	926.581	927.587	2	0.0004781	0.5154	634	641	7
5628	186	hypothetical protein VITISV_000978 [Vitis vinifera]	gi|147797811,gi|225459844	71102.4	0.104	LESGLYSR	35	43	4.29		462.743	923.471	924.479	2	-0.0005619	-0.6078	512	519	7
5628	186	hypothetical protein VITISV_000978 [Vitis vinifera]	gi|147797811,gi|225459844	71102.4	0.104	QVTVDRPDVAGR	54.4	44.2	7.27		438.238	1311.69	1312.7	3	0.001332	1.015	373	384	7
5628	186	hypothetical protein VITISV_000978 [Vitis vinifera]	gi|147797811,gi|225459844	71102.4	0.104	YSEFLNAVK	26.7	42.7	6.16		535.78	1069.54	1070.55	2	0.0001981	0.185	128	136	7
5628	186	PREDICTED: succinate dehydrogenase [ubiquinone] flavoprotein subunit 1, mitochondrial isoform 1 [Vitis vinifera]	gi|225430776	73642.3	0.1	AAIGELSK	41.9	45.7	2.73		394.729	787.444	788.451	2	0.0004381	0.5556	52	59	6
5628	186	PREDICTED: succinate dehydrogenase [ubiquinone] flavoprotein subunit 1, mitochondrial isoform 1 [Vitis vinifera]	gi|225430776	73642.3	0.1	AFGGQSLNFGK	54.8	43.9	9.04		563.287	1124.56	1125.57	2	-0.001542	-1.37	196	206	6
5628	186	PREDICTED: succinate dehydrogenase [ubiquinone] flavoprotein subunit 1, mitochondrial isoform 1 [Vitis vinifera]	gi|225430776	73642.3	0.1	FQAASTILATGGYGR	69.2	44.4	12		756.895	1511.78	1512.78	2	0.001798	1.189	272	286	6
5628	186	PREDICTED: succinate dehydrogenase [ubiquinone] flavoprotein subunit 1, mitochondrial isoform 1 [Vitis vinifera]	gi|225430776	73642.3	0.1	HGVDTAGITELYR	53.8	45.1	9.89		477.913	1430.72	1431.72	3	0.003042	2.125	60	72	6
5628	186	PREDICTED: succinate dehydrogenase [ubiquinone] flavoprotein subunit 1, mitochondrial isoform 1 [Vitis vinifera]	gi|225430776	73642.3	0.1	TQETLEEGcK	58.5	40.9	11.9	c9: Carbamidomethyl (+57.02)	597.769	1193.52	1194.53	2	0.0005728	0.4795	554	563	6
5628	186	PREDICTED: succinate dehydrogenase [ubiquinone] flavoprotein subunit 1, mitochondrial isoform 1 [Vitis vinifera]	gi|225430776	73642.3	0.1	VAEIHKPGEK	38.4	44	2.05		369.877	1106.61	1107.62	3	0.0008721	0.7873	497	506	6
5628	186	PREDICTED: isoflavone reductase homolog P3 [Vitis vinifera]	gi|225458243,gi|76559892	33788.2	0.14	ESTIADPVK	58.9	44.4	5.02		480.254	958.493	959.505	2	-0.004402	-4.588	37	45	3
5628	186	PREDICTED: isoflavone reductase homolog P3 [Vitis vinifera]	gi|225458243,gi|76559892	33788.2	0.14	FLPSEFGNDVDR	69.5	43.6	7.59		698.333	1394.65	1395.65	2	0.005518	3.954	108	119	3
5628	186	PREDICTED: isoflavone reductase homolog P3 [Vitis vinifera]	gi|225458243,gi|76559892	33788.2	0.14	VYVPEEQVLK	22	45	5.39		602.334	1202.65	1203.66	2	-0.001142	-0.9487	241	250	3
5628	186	unnamed protein product [Vitis vinifera]	gi|297745522,gi|359485890	80913.4	0.032	DVcTSEHQELAR	41.3	40.6	5.66	c3: Carbamidomethyl (+57.02)	482.221	1443.64	1444.65	3	0.0007968	0.5515	391	402	2
5628	186	unnamed protein product [Vitis vinifera]	gi|297745522,gi|359485890	80913.4	0.032	GLQQSDDGSPDR	46.3	38.5	9.5		637.782	1273.55	1274.56	2	-0.003662	-2.873	201	212	2
6024	187	PREDICTED: eukaryotic translation initiation factor 5A [Vitis vinifera]	gi|225468027	17449.8	0.281	DDLRLPTDDNLLSQIK	29.7	45	10.3		619.332	1854.97	1855.98	3	0.003832	2.065	113	128	4
6024	187	PREDICTED: eukaryotic translation initiation factor 5A [Vitis vinifera]	gi|225468027	17449.8	0.281	DLVVTVMSAMGEEQIcALK	44.7	45.1	0	c16: Carbamidomethyl (+57.02)	698.684	2093.03	2094.03	3	0.008127	3.881	136	154	4
6024	187	PREDICTED: eukaryotic translation initiation factor 5A [Vitis vinifera]	gi|225468027	17449.8	0.281	LPTDDNLLSQIK	77.3	44.5	9.37		678.873	1355.73	1356.74	2	0.001838	1.355	117	128	4
6024	187	PREDICTED: eukaryotic translation initiation factor 5A [Vitis vinifera]	gi|225468027	17449.8	0.281	TYPQQAGAIR	54.9	45.7	6.41		552.793	1103.57	1104.58	2	-0.0001219	-0.1104	19	28	4
6024	187	PREDICTED: uncharacterized protein LOC100254752 [Vitis vinifera]	gi|225426477	17412	0.241	IITLAGSNTGATMR	33.1	45.7	0		703.375	1404.73	1405.75	2	-0.004762	-3.387	57	70	3
6024	187	PREDICTED: uncharacterized protein LOC100254752 [Vitis vinifera]	gi|225426477	17412	0.241	LSDLQQVQK	42.7	46.2	5.85		529.797	1057.58	1058.58	2	0.002218	2.095	33	41	3
6024	187	PREDICTED: uncharacterized protein LOC100254752 [Vitis vinifera]	gi|225426477	17412	0.241	QGSSQQDDEDDRGVR	31.5	37.3	9.27		564.578	1690.71	1691.72	3	-0.003418	-2.02	42	56	3
6024	187	PREDICTED: uncharacterized protein LOC100245212 [Vitis vinifera]	gi|225455288	25903.9	0.0944	EAHPPGAINVQIYR	34.8	45.2	10.3		522.28	1563.82	1564.82	3	0.002842	1.816	115	128	2
6024	187	PREDICTED: uncharacterized protein LOC100245212 [Vitis vinifera]	gi|225455288	25903.9	0.0944	SPAEEDWK	32	39	7.32		481.219	960.423	961.426	2	0.004098	4.262	67	74	2
6024	187	PREDICTED: eukaryotic translation initiation factor 5A [Vitis vinifera]	gi|225430468	17394.8	0.281	DDLRLPTDDNLLTQIK	69.3	44.4	10.2		935.506	1869	1869.99	2	0.01196	6.395	113	128	4
6024	187	PREDICTED: eukaryotic translation initiation factor 5A [Vitis vinifera]	gi|225430468	17394.8	0.281	DLVVTVMTAMGEEQIcALK	45.3	45.7	0	c16: Carbamidomethyl (+57.02)	703.355	2107.04	2108.04	3	0.005787	2.745	136	154	4
6024	187	PREDICTED: eukaryotic translation initiation factor 5A [Vitis vinifera]	gi|225430468	17394.8	0.281	LPTDDNLLTQIK	92.9	44.5	10.9		685.879	1369.74	1370.75	2	-0.001862	-1.358	117	128	4
6024	187	PREDICTED: eukaryotic translation initiation factor 5A [Vitis vinifera]	gi|225430468	17394.8	0.281	TYPQQAGAIR	54.9	45.7	6.41		552.793	1103.57	1104.58	2	-0.0001219	-0.1104	19	28	4
6024	187	PREDICTED: universal stress protein A-like protein isoform 1 [Vitis vinifera]	gi|225431940	18037.7	0.576	DIVVVMK	34.3	43.4	0		402.239	802.463	803.47	2	0.0009781	1.217	96	102	8
6024	187	PREDICTED: universal stress protein A-like protein isoform 1 [Vitis vinifera]	gi|225431940	18037.7	0.576	IcEAIDNIPLScLVIGNR	105	45.2	12.7	c2: Carbamidomethyl (+57.02), c12: Carbamidomethyl (+57.02)	1029.03	2056.05	2057.05	2	0.009427	4.583	112	129	8
6024	187	PREDICTED: universal stress protein A-like protein isoform 1 [Vitis vinifera]	gi|225431940	18037.7	0.576	QKDIVVVMK	48	43.7	0		530.314	1058.61	1059.62	2	-0.001922	-1.814	94	102	8
6024	187	PREDICTED: universal stress protein A-like protein isoform 1 [Vitis vinifera]	gi|225431940	18037.7	0.576	RAILGSVSNYVVNNGScPVTVVK	35.6	44.4	10.9	c17: Carbamidomethyl (+57.02)	811.767	2432.28	2433.29	3	-0.005963	-2.451	136	158	8
6024	187	PREDICTED: universal stress protein A-like protein isoform 1 [Vitis vinifera]	gi|225431940	18037.7	0.576	VGVAVDFSAcSK	78.4	44	12.7	c10: Carbamidomethyl (+57.02)	620.307	1238.6	1239.6	2	0.001813	1.462	7	18	8
6024	187	PREDICTED: universal stress protein A-like protein isoform 1 [Vitis vinifera]	gi|225431940	18037.7	0.576	VYWGDAR	48.8	42	2.04		433.71	865.406	866.415	2	-0.002702	-3.119	103	109	8
6024	187	PREDICTED: universal stress protein A-like protein isoform 1 [Vitis vinifera]	gi|225431940	18037.7	0.576	WALDNVVR	22.3	44.1	4.6		486.767	971.519	972.526	2	-0.0002419	-0.2488	23	30	8
6024	187	PREDICTED: universal stress protein A-like protein isoform 1 [Vitis vinifera]	gi|225431940	18037.7	0.576	YGVKPDAETLDIVNcVAR	102	45.6	13.9	c15: Carbamidomethyl (+57.02)	1010.51	2019.01	2020.02	2	-0.001267	-0.6273	76	93	8
6024	187	PREDICTED: heat shock 70 kDa protein, mitochondrial-like [Vitis vinifera]	gi|225429228	72753.2	0.0736	EVDEVLLVGGMTR	67.3	45.3	0		709.368	1416.72	1417.74	2	-0.006762	-4.77	380	392	3
6024	187	PREDICTED: heat shock 70 kDa protein, mitochondrial-like [Vitis vinifera]	gi|225429228	72753.2	0.0736	GVNPDEAVAMGAAIQGGILR	36.2	44.8	0		647.01	1938.01	1939.01	3	0.008482	4.374	411	430	3
6024	187	PREDICTED: heat shock 70 kDa protein, mitochondrial-like [Vitis vinifera]	gi|225429228	72753.2	0.0736	SQVFSTAADNQTQVGIK	66.8	45.3	9.96		598.636	1792.89	1793.9	3	-0.008208	-4.575	470	486	3
6024	187	PREDICTED: CBS domain-containing protein CBSX3, mitochondrial isoform 1 [Vitis vinifera]	gi|225434277,gi|297745725	22604.8	0.0878	LITVSPNTK	49.4	45.3	6.38		486.793	971.571	972.572	2	0.005238	5.386	141	149	2
6024	187	PREDICTED: CBS domain-containing protein CBSX3, mitochondrial isoform 1 [Vitis vinifera]	gi|225434277,gi|297745725	22604.8	0.0878	SIAGIITER	54.4	45.9	8.37		480.278	958.541	959.552	2	-0.004062	-4.233	105	113	2
6024	187	PREDICTED: peptidyl-prolyl cis-trans isomerase isoform 1 [Vitis vinifera]	gi|225457957	17920.3	0.18	FADENFIHK	41.4	44.1	9.63		560.774	1119.53	1120.54	2	-0.001342	-1.198	90	98	4
6024	187	PREDICTED: peptidyl-prolyl cis-trans isomerase isoform 1 [Vitis vinifera]	gi|225457957	17920.3	0.18	TAENFR	31.6	43.1	-0.47		369.183	736.351	737.358	2	0.0001781	0.2415	32	37	4
6024	187	PREDICTED: peptidyl-prolyl cis-trans isomerase isoform 1 [Vitis vinifera]	gi|225457957	17920.3	0.18	TSWLDGK	36.4	44.5	1.92		403.706	805.397	806.404	2	-0.0006019	-0.7465	126	132	4
6024	187	PREDICTED: peptidyl-prolyl cis-trans isomerase isoform 1 [Vitis vinifera]	gi|225457957	17920.3	0.18	VIEGLDVVK	36.2	42.9	7.34		486.292	970.57	971.577	2	0.0001381	0.1421	139	147	4
6024	187	PREDICTED: uncharacterized protein At4g28440 [Vitis vinifera]	gi|225452474	15273.4	0.27	GRPDGPQVR	26	44.3	5.21		491.264	980.513	981.523	2	-0.002182	-2.223	42	50	3
6024	187	PREDICTED: uncharacterized protein At4g28440 [Vitis vinifera]	gi|225452474	15273.4	0.27	NDQVDLmKPDTTVILR	69.6	45.5	11.8	m7: Oxidation (+15.99)	625.327	1872.96	1873.97	3	-0.003523	-1.88	72	87	3
6024	187	PREDICTED: uncharacterized protein At4g28440 [Vitis vinifera]	gi|225452474	15273.4	0.27	VEVTEPASFTVK	53.1	46	9.01		653.847	1305.68	1306.69	2	-0.001142	-0.8739	108	119	3
6024	187	PREDICTED: 40S ribosomal protein S12-like isoform 2 [Vitis vinifera]	gi|225465502,gi|297745090	15007.6	0.183	ALcADHNVSLITVPSAK	45.5	45.3	9.16	c3: Carbamidomethyl (+57.02)	599.314	1794.92	1795.94	3	-0.009103	-5.069	78	94	2
6024	187	PREDICTED: 40S ribosomal protein S12-like isoform 2 [Vitis vinifera]	gi|225465502,gi|297745090	15007.6	0.183	SLAHGGLAR	28.7	41.3	2.24		441.25	880.486	881.495	2	-0.001762	-1.999	36	44	2
6024	187	PREDICTED: germin-like protein 11-1 [Vitis vinifera]	gi|225455388	24523.7	0.0493	NPTNIIASDFK	77.6	45.4	11.5		610.318	1218.62	1219.63	2	-0.002682	-2.199	51	61	1
6024	187	PREDICTED: eukaryotic translation initiation factor 5A-2-like [Vitis vinifera]	gi|359491680	17395.7	0.283	DDLRLPTDDNLLTQIK	69.3	44.4	10.2		935.506	1869	1869.99	2	0.01196	6.395	113	128	4
6024	187	PREDICTED: eukaryotic translation initiation factor 5A-2-like [Vitis vinifera]	gi|359491680	17395.7	0.283	DLVVSVMSAMGEEQIcALK	61.3	44.8	0	c16: Carbamidomethyl (+57.02)	694.008	2079	2080.01	3	-0.002373	-1.141	136	154	4
6024	187	PREDICTED: eukaryotic translation initiation factor 5A-2-like [Vitis vinifera]	gi|359491680	17395.7	0.283	LPTDDNLLTQIK	92.9	44.5	10.9		685.879	1369.74	1370.75	2	-0.001862	-1.358	117	128	4
6024	187	PREDICTED: eukaryotic translation initiation factor 5A-2-like [Vitis vinifera]	gi|359491680	17395.7	0.283	TYPQQAGTIR	53.4	45.7	5.71		567.797	1133.58	1134.59	2	-0.004722	-4.162	19	28	4
6024	187	pathogenesis-related protein 10 [Vitis hybrid cultivar]	gi|163914213,gi|225431844,gi|334089964	17090.6	0.494	AAVLDADNLIPK	27	42.3	8.53		620.353	1238.69	1239.69	2	0.004098	3.306	22	33	7
6024	187	pathogenesis-related protein 10 [Vitis hybrid cultivar]	gi|163914213,gi|225431844,gi|334089964	17090.6	0.494	AIEAYVLAHPDAY	78.9	45.2	11.1		716.862	1431.71	1432.71	2	0.005398	3.768	146	158	7
6024	187	pathogenesis-related protein 10 [Vitis hybrid cultivar]	gi|163914213,gi|225431844,gi|334089964	17090.6	0.494	cVEVIQGDGGPGTIK	73	44.6	11.1	c1: Carbamidomethyl (+57.02)	765.385	1528.76	1529.76	2	-0.0003872	-0.2531	41	55	7
6024	187	pathogenesis-related protein 10 [Vitis hybrid cultivar]	gi|163914213,gi|225431844,gi|334089964	17090.6	0.494	EDALATFK	57.4	44.1	5.85		447.732	893.45	894.457	2	0.0004781	0.5345	138	145	7
6024	187	pathogenesis-related protein 10 [Vitis hybrid cultivar]	gi|163914213,gi|225431844,gi|334089964	17090.6	0.494	GAEVcEEHVK	25	40.7	7.38	c5: Carbamidomethyl (+57.02)	579.265	1156.52	1157.53	2	-0.002987	-2.581	125	134	7
6024	187	pathogenesis-related protein 10 [Vitis hybrid cultivar]	gi|163914213,gi|225431844,gi|334089964	17090.6	0.494	GGKEDALATFK	100	46.2	13.1		568.802	1135.59	1136.59	2	0.001078	0.9485	135	145	7
6024	187	pathogenesis-related protein 10 [Vitis hybrid cultivar]	gi|163914213,gi|225431844,gi|334089964	17090.6	0.494	GVFTYEQEITSSVPPAK	63.6	45.2	9.3		926.975	1851.94	1852.93	2	0.01024	5.525	2	18	7
7516	188	PREDICTED: leucine aminopeptidase 2, chloroplastic isoform 1 [Vitis vinifera]	gi|225445867,gi|297743644	60726.3	0.11	EVLAASEASGEK	75.3	44.8	11.9		595.797	1189.58	1190.59	2	-0.002762	-2.32	490	501	6
7516	188	PREDICTED: leucine aminopeptidase 2, chloroplastic isoform 1 [Vitis vinifera]	gi|225445867,gi|297743644	60726.3	0.11	GLTFDSGGYNIK	50.3	43.5	9.3		636.32	1270.63	1271.63	2	0.006278	4.937	353	364	6
7516	188	PREDICTED: leucine aminopeptidase 2, chloroplastic isoform 1 [Vitis vinifera]	gi|225445867,gi|297743644	60726.3	0.11	IASAYSDVLSAK	74.9	44.5	11.8		612.828	1223.64	1224.65	2	0.001358	1.109	292	303	6
7516	188	PREDICTED: leucine aminopeptidase 2, chloroplastic isoform 1 [Vitis vinifera]	gi|225445867,gi|297743644	60726.3	0.11	ILDAEQcK	46.6	44.1	5.43	c7: Carbamidomethyl (+57.02)	488.744	975.473	976.477	2	0.003393	3.474	304	311	6
7516	188	PREDICTED: leucine aminopeptidase 2, chloroplastic isoform 1 [Vitis vinifera]	gi|225445867,gi|297743644	60726.3	0.11	SGQSTILR	48.2	46.4	3.21		431.24	860.465	861.479	2	-0.006962	-8.081	141	148	6
7516	188	PREDICTED: leucine aminopeptidase 2, chloroplastic isoform 1 [Vitis vinifera]	gi|225445867,gi|297743644	60726.3	0.11	TIEVNNTDAEGR	69.4	42.9	11.6		659.817	1317.62	1318.62	2	0.004118	3.123	430	441	6
7516	188	RecName: Full=Ribulose bisphosphate carboxylase large chain; Short=RuBisCO large subunit	gi|134034997	6083.8	0.4	LTYYTPEYETK	60.5	43.4	10.4		704.335	1406.65	1407.67	2	-0.005922	-4.207	1	11	1
7516	188	PREDICTED: UDP-glucose 6-dehydrogenase-like isoform 1 [Vitis vinifera]	gi|225423507	52726	0.242	AADLTYWESAAR	52.6	43.8	11		677.327	1352.64	1353.64	2	0.003498	2.584	100	111	9
7516	188	PREDICTED: UDP-glucose 6-dehydrogenase-like isoform 1 [Vitis vinifera]	gi|225423507	52726	0.242	AHLSIYDPQVSGEQIQR	69.4	45.3	10.6		970.997	1939.98	1940.98	2	0.003198	1.648	358	374	9
7516	188	PREDICTED: UDP-glucose 6-dehydrogenase-like isoform 1 [Vitis vinifera]	gi|225423507	52726	0.242	DVYAHWVPVER	50.5	43.7	12.1		685.848	1369.68	1370.69	2	0.003378	2.464	193	203	9
7516	188	PREDICTED: UDP-glucose 6-dehydrogenase-like isoform 1 [Vitis vinifera]	gi|225423507	52726	0.242	ETPAIDVcK	52.5	44.1	6.46	c8: Carbamidomethyl (+57.02)	516.756	1031.5	1032.5	2	0.001073	1.039	343	351	9
7516	188	PREDICTED: UDP-glucose 6-dehydrogenase-like isoform 1 [Vitis vinifera]	gi|225423507	52726	0.242	IAILGFAFK	44.8	37.5	9.41		490.305	978.596	979.598	2	0.005258	5.368	327	335	9
7516	188	PREDICTED: UDP-glucose 6-dehydrogenase-like isoform 1 [Vitis vinifera]	gi|225423507	52726	0.242	IYDNmQKPAFVFDGR	74.7	43.8	9.13	m5: Oxidation (+15.99)	606.293	1815.86	1816.87	3	-0.004263	-2.346	433	447	9
7516	188	PREDICTED: UDP-glucose 6-dehydrogenase-like isoform 1 [Vitis vinifera]	gi|225423507	52726	0.242	LAANAFLAQR	57.1	44.5	9.63		537.81	1073.61	1074.61	2	0.007698	7.164	217	226	9
7516	188	PREDICTED: UDP-glucose 6-dehydrogenase-like isoform 1 [Vitis vinifera]	gi|225423507	52726	0.242	VLIGGR	34.7	43.7	-0.792		307.703	613.392	614.399	2	0.0009781	1.592	174	179	9
7516	188	PREDICTED: UDP-glucose 6-dehydrogenase-like isoform 1 [Vitis vinifera]	gi|225423507	52726	0.242	VVSSmFNTVSGK	46.9	43.2	9.06	m5: Oxidation (+15.99)	636.318	1270.62	1271.63	2	-0.001797	-1.413	314	325	9
7516	188	PREDICTED: universal stress protein A-like protein isoform 1 [Vitis vinifera]	gi|225431940	18037.7	0.0727	VGVAVDFSAcSK	68.9	44	11.7	c10: Carbamidomethyl (+57.02)	620.307	1238.6	1239.6	2	0.002373	1.914	7	18	1
7516	188	hypothetical protein VITISV_013710 [Vitis vinifera]	gi|147772376,gi|225457075,gi|359720700	58594.3	0.201	AVITPLK	36.1	35.9	-0.802		371.245	740.476	741.487	2	-0.003542	-4.777	527	533	4
7516	188	hypothetical protein VITISV_013710 [Vitis vinifera]	gi|147772376,gi|225457075,gi|359720700	58594.3	0.201	GIEQGPQIDPEQFAK	54.8	44.5	8.41		828.915	1655.82	1656.82	2	-0.0001619	-0.09774	375	389	4
7516	188	hypothetical protein VITISV_013710 [Vitis vinifera]	gi|147772376,gi|225457075,gi|359720700	58594.3	0.201	IAFTGSTDTGK	63.2	43.4	9.44		549.279	1096.54	1097.55	2	0.002098	1.912	278	288	4
7516	188	hypothetical protein VITISV_013710 [Vitis vinifera]	gi|147772376,gi|225457075,gi|359720700	58594.3	0.201	IVQELASK	51	46.5	6.35		444.265	886.515	887.52	2	0.002818	3.175	289	296	4
7516	188	hypothetical protein VITISV_013710 [Vitis vinifera]	gi|147772376,gi|225457075,gi|359720700	58594.3	0.201	KAFDEGPWPR	38.3	43.9	7.11		401.536	1201.58	1202.6	3	-0.003588	-2.984	106	115	4
7516	188	hypothetical protein VITISV_013710 [Vitis vinifera]	gi|147772376,gi|225457075,gi|359720700	58594.3	0.201	SNLKPVTLELGGK	30.8	42.2	9.58		678.399	1354.78	1355.79	2	0.0001581	0.1166	297	309	4
7516	188	hypothetical protein VITISV_013710 [Vitis vinifera]	gi|147772376,gi|225457075,gi|359720700	58594.3	0.201	TAEQTPLTALFAAK	33.7	44.4	9.37		731.405	1460.79	1461.79	2	0.007158	4.897	230	243	4
7516	188	hypothetical protein VITISV_013710 [Vitis vinifera]	gi|147772376,gi|225457075,gi|359720700	58594.3	0.201	YYAGWADK	26.9	38.9	5.61		487.226	972.438	973.441	2	0.003838	3.943	168	175	4
7516	188	PREDICTED: aldehyde dehydrogenase family 2 member B4, mitochondrial [Vitis vinifera]	gi|225424691	58318	0.212	AEVPLVIR	48.3	36.1	6.08		448.783	895.551	896.556	2	0.001898	2.117	157	164	10
7516	188	PREDICTED: aldehyde dehydrogenase family 2 member B4, mitochondrial [Vitis vinifera]	gi|225424691	58318	0.212	AGIEQGPQIDSDQFEK	56.7	43.5	12.9		881.418	1760.82	1761.83	2	-0.001002	-0.5687	374	389	10
7516	188	PREDICTED: aldehyde dehydrogenase family 2 member B4, mitochondrial [Vitis vinifera]	gi|225424691	58318	0.212	AVITPLK	36.1	35.9	-0.802		371.245	740.476	741.487	2	-0.003542	-4.777	527	533	10
7516	188	PREDICTED: aldehyde dehydrogenase family 2 member B4, mitochondrial [Vitis vinifera]	gi|225424691	58318	0.212	KAFDEGPWPR	38.3	43.9	7.11		401.536	1201.58	1202.6	3	-0.003588	-2.984	106	115	10
7516	188	PREDICTED: aldehyde dehydrogenase family 2 member B4, mitochondrial [Vitis vinifera]	gi|225424691	58318	0.212	LAFTGSTATGK	69.7	43.7	10		527.284	1052.55	1053.56	2	0.003698	3.51	278	288	10
7516	188	PREDICTED: aldehyde dehydrogenase family 2 member B4, mitochondrial [Vitis vinifera]	gi|225424691	58318	0.212	SGVENGATLETGGER	79.8	42.6	12.4		738.848	1475.68	1476.69	2	-0.003802	-2.575	396	410	10
7516	188	PREDICTED: aldehyde dehydrogenase family 2 member B4, mitochondrial [Vitis vinifera]	gi|225424691	58318	0.212	SNLKPVTLELGGK	30.8	42.2	9.58		678.399	1354.78	1355.79	2	0.0001581	0.1166	297	309	10
7516	188	PREDICTED: aldehyde dehydrogenase family 2 member B4, mitochondrial [Vitis vinifera]	gi|225424691	58318	0.212	TFETLDPR	43.8	45.1	9.31		489.749	977.483	978.489	2	0.001338	1.367	74	81	10
7516	188	PREDICTED: aldehyde dehydrogenase family 2 member B4, mitochondrial [Vitis vinifera]	gi|225424691	58318	0.212	TGNVIASVAEGDAEDVNR	71.6	44	12.9		908.939	1815.86	1816.87	2	0.004138	2.278	82	99	10
7516	188	PREDICTED: aldehyde dehydrogenase family 2 member B4, mitochondrial [Vitis vinifera]	gi|225424691	58318	0.212	YYAGWADK	26.9	38.9	5.61		487.226	972.438	973.441	2	0.003838	3.943	168	175	10
7516	188	PREDICTED: UDP-glucose 6-dehydrogenase [Vitis vinifera]	gi|225452968	52944.6	0.181	AADLTYWESAAR	52.6	43.8	11		677.327	1352.64	1353.64	2	0.003498	2.584	100	111	1
7516	188	PREDICTED: UDP-glucose 6-dehydrogenase [Vitis vinifera]	gi|225452968	52944.6	0.181	DVYAHWVPEDR	44.2	41.7	6.97		462.886	1385.64	1386.64	3	-0.0009579	-0.6908	193	203	1
7516	188	PREDICTED: UDP-glucose 6-dehydrogenase [Vitis vinifera]	gi|225452968	52944.6	0.181	ETPAIDVcK	52.5	44.1	6.46	c8: Carbamidomethyl (+57.02)	516.756	1031.5	1032.5	2	0.001073	1.039	343	351	1
7516	188	PREDICTED: UDP-glucose 6-dehydrogenase [Vitis vinifera]	gi|225452968	52944.6	0.181	IAILGFAFK	44.8	37.5	9.41		490.305	978.596	979.598	2	0.005258	5.368	327	335	1
7516	188	PREDICTED: UDP-glucose 6-dehydrogenase [Vitis vinifera]	gi|225452968	52944.6	0.181	IYDNmQKPAFVFDGR	74.7	43.8	9.13	m5: Oxidation (+15.99)	606.293	1815.86	1816.87	3	-0.004263	-2.346	433	447	1
7516	188	PREDICTED: UDP-glucose 6-dehydrogenase [Vitis vinifera]	gi|225452968	52944.6	0.181	LAANAFLAQR	57.1	44.5	9.63		537.81	1073.61	1074.61	2	0.007698	7.164	217	226	1
7516	188	PREDICTED: UDP-glucose 6-dehydrogenase [Vitis vinifera]	gi|225452968	52944.6	0.181	VLIGGR	34.7	43.7	-0.792		307.703	613.392	614.399	2	0.0009781	1.592	174	179	1
7516	188	unnamed protein product [Vitis vinifera]	gi|297735044,gi|359476844	54267.5	0.0883	GcPQSPLSPEGDAK	53.5	41.5	10	c2: Carbamidomethyl (+57.02)	721.832	1441.65	1442.66	2	-0.002427	-1.682	440	453	3
7516	188	unnamed protein product [Vitis vinifera]	gi|297735044,gi|359476844	54267.5	0.0883	LAVDGNAVK	29.8	46.1	4.41		443.756	885.498	886.499	2	0.005498	6.202	239	247	3
7516	188	unnamed protein product [Vitis vinifera]	gi|297735044,gi|359476844	54267.5	0.0883	QIGESAGAEcK	84.2	41.4	9.28	c10: Carbamidomethyl (+57.02)	575.264	1148.51	1149.52	2	0.0002728	0.2373	215	225	3
7516	188	PREDICTED: serine hydroxymethyltransferase 1 [Vitis vinifera]	gi|225433510	51889.9	0.238	ALDFRPK	28.2	45.4	4.71		423.745	845.475	846.483	2	-0.001142	-1.349	177	183	10
7516	188	PREDICTED: serine hydroxymethyltransferase 1 [Vitis vinifera]	gi|225433510	51889.9	0.238	IGAPAmTSR	57.1	45.7	5.05	m6: Oxidation (+15.99)	460.237	918.459	919.467	2	-0.000117	-0.1272	390	398	10
7516	188	PREDICTED: serine hydroxymethyltransferase 1 [Vitis vinifera]	gi|225433510	51889.9	0.238	KGQPEDAVYDFEDK	42.2	41	8.15		547.584	1639.73	1640.74	3	-0.006278	-3.826	265	278	10
7516	188	PREDICTED: serine hydroxymethyltransferase 1 [Vitis vinifera]	gi|225433510	51889.9	0.238	LcDLcNITVNK	60.5	44.7	11.9	c2: Carbamidomethyl (+57.02), c5: Carbamidomethyl (+57.02)	675.333	1348.65	1349.66	2	0.002667	1.976	363	373	10
7516	188	PREDICTED: serine hydroxymethyltransferase 1 [Vitis vinifera]	gi|225433510	51889.9	0.238	LIIcGGSAYPR	69	45.6	11.4	c4: Carbamidomethyl (+57.02)	603.818	1205.62	1206.63	2	-0.0004872	-0.4038	184	194	10
7516	188	PREDICTED: serine hydroxymethyltransferase 1 [Vitis vinifera]	gi|225433510	51889.9	0.238	NAVFGDSSALAPGGVR	95.4	45.4	13.4		759.394	1516.77	1517.77	2	0.009898	6.521	374	389	10
7516	188	PREDICTED: serine hydroxymethyltransferase 1 [Vitis vinifera]	gi|225433510	51889.9	0.238	QAmVPGFK	32.6	43.1	3.3	m3: Oxidation (+15.99)	447.234	892.453	893.455	2	0.005443	6.092	305	312	10
7516	188	PREDICTED: serine hydroxymethyltransferase 1 [Vitis vinifera]	gi|225433510	51889.9	0.238	VSSTTGYIDYDR	83	41.4	12.5		688.818	1375.62	1376.63	2	-0.003582	-2.602	161	172	10
7516	188	PREDICTED: serine hydroxymethyltransferase 1 [Vitis vinifera]	gi|225433510	51889.9	0.238	VSSTTGYIDYDRLEEK	54.4	44	10.4		625.97	1874.89	1875.9	3	-0.001408	-0.7505	161	176	10
7516	188	PREDICTED: serine hydroxymethyltransferase 1 [Vitis vinifera]	gi|225433510	51889.9	0.238	YSEGmPGNR	36.9	36.8	4.64	m5: Oxidation (+15.99)	513.718	1025.42	1026.43	2	-0.002957	-2.881	59	67	10
7516	188	PREDICTED: adenosylhomocysteinase isoform 1 [Vitis vinifera]	gi|225433506	53164	0.381	ATDVmIAGK	50.6	44.3	5.02	m5: Oxidation (+15.99)	461.237	920.46	921.471	2	-0.003617	-3.925	255	263	17
7516	188	PREDICTED: adenosylhomocysteinase isoform 1 [Vitis vinifera]	gi|225433506	53164	0.381	DIImVDHMR	38.2	42.1	0	m4: Oxidation (+15.99)	382.52	1144.54	1145.54	3	0.001357	1.185	329	337	17
7516	188	PREDICTED: adenosylhomocysteinase isoform 1 [Vitis vinifera]	gi|225433506	53164	0.381	DmSQADFGR	42	34.1	7.68	m2: Oxidation (+15.99)	521.715	1041.42	1042.43	2	-0.003477	-3.335	18	26	17
7516	188	PREDICTED: adenosylhomocysteinase isoform 1 [Vitis vinifera]	gi|225433506	53164	0.381	DQADYISVPIEGPYKPPHYR	34.5	45.5	8.19		782.393	2344.16	2345.16	3	0.006482	2.764	465	484	17
7516	188	PREDICTED: adenosylhomocysteinase isoform 1 [Vitis vinifera]	gi|225433506	53164	0.381	FDNLYGcR	38.9	38.1	6.82	c7: Carbamidomethyl (+57.02)	522.732	1043.45	1044.46	2	-0.0009472	-0.9069	238	245	17
7516	188	PREDICTED: adenosylhomocysteinase isoform 1 [Vitis vinifera]	gi|225433506	53164	0.381	HSLPDGLmR	33.1	42.6	2.66	m8: Oxidation (+15.99)	521.262	1040.51	1041.51	2	0.002023	1.942	246	254	17
7516	188	PREDICTED: adenosylhomocysteinase isoform 1 [Vitis vinifera]	gi|225433506	53164	0.381	ITIKPQTDR	50.8	45	5.07		536.314	1070.61	1071.62	2	0.004678	4.365	369	377	17
7516	188	PREDICTED: adenosylhomocysteinase isoform 1 [Vitis vinifera]	gi|225433506	53164	0.381	KVYVLPK	19.3	35.4	6.97		423.777	845.539	846.545	2	0.001878	2.218	435	441	17
7516	188	PREDICTED: adenosylhomocysteinase isoform 1 [Vitis vinifera]	gi|225433506	53164	0.381	LPDPSSTDNAEFQIVLTIIR	53.9	43.8	13		743.737	2228.19	2229.18	3	0.01901	8.529	163	182	17
7516	188	PREDICTED: adenosylhomocysteinase isoform 1 [Vitis vinifera]	gi|225433506	53164	0.381	LVGVSEETTTGVK	72.6	45.5	12.3		660.357	1318.7	1319.71	2	0.0005981	0.4532	199	211	17
7516	188	PREDICTED: adenosylhomocysteinase isoform 1 [Vitis vinifera]	gi|225433506	53164	0.381	NNAIVcNIGHFDNEIDmLGLETYPGVK	36.4	43	11.6	c6: Carbamidomethyl (+57.02), m17: Oxidation (+15.99)	1017.14	3048.41	3049.44	3	-0.0251	-8.231	341	367	17
7516	188	PREDICTED: adenosylhomocysteinase isoform 1 [Vitis vinifera]	gi|225433506	53164	0.381	SKFDNLYGcR	52.2	41.9	10.9	c9: Carbamidomethyl (+57.02)	630.297	1258.58	1259.58	2	0.002813	2.233	236	245	17
7516	188	PREDICTED: adenosylhomocysteinase isoform 1 [Vitis vinifera]	gi|225433506	53164	0.381	TEFGPQQPFK	22	44.9	5.16		589.796	1177.58	1178.58	2	0.0008581	0.728	44	53	17
7516	188	PREDICTED: adenosylhomocysteinase isoform 1 [Vitis vinifera]	gi|225433506	53164	0.381	VAVVcGYGDVGK	59.5	44.3	8.92	c5: Carbamidomethyl (+57.02)	612.305	1222.6	1223.61	2	-0.006187	-5.057	264	275	17
7516	188	PREDICTED: adenosylhomocysteinase isoform 1 [Vitis vinifera]	gi|225433506	53164	0.381	VKDmSQADFGR	22.6	41.6	4.09	m4: Oxidation (+15.99)	423.866	1268.58	1269.59	3	-0.006363	-5.012	16	26	17
7516	188	PREDICTED: adenosylhomocysteinase isoform 1 [Vitis vinifera]	gi|225433506	53164	0.381	VYVLPK	37.4	41.7	0.296		359.73	717.445	718.45	2	0.002638	3.672	436	441	17
7516	188	PREDICTED: adenosylhomocysteinase isoform 1 [Vitis vinifera]	gi|225433506	53164	0.381	WcScNIFSTQDHAAAAIAR	91.1	40.7	12.2	c2: Carbamidomethyl (+57.02), c4: Carbamidomethyl (+57.02)	726.996	2177.97	2178.98	3	-0.008049	-3.694	83	101	17
7516	188	PREDICTED: glutamate decarboxylase 1 [Vitis vinifera]	gi|225466257	55212.7	0.0451	LGHEGYR	33.6	42.1	2.18		416.209	830.404	831.411	2	0.0006981	0.8396	335	341	2
7516	188	PREDICTED: glutamate decarboxylase 1 [Vitis vinifera]	gi|225466257	55212.7	0.0451	LVTDIQK	33.7	47.5	4.68		408.747	815.479	816.483	2	0.003438	4.211	433	439	2
7516	188	PREDICTED: enolase 1 [Vitis vinifera]	gi|225441000	47856.4	0.405	AcNALLLK	43.8	46.6	9.2	c2: Carbamidomethyl (+57.02)	451.759	901.503	902.513	2	-0.002487	-2.756	345	352	15
7516	188	PREDICTED: enolase 1 [Vitis vinifera]	gi|225441000	47856.4	0.405	AGWGVmASHR	76.7	40.9	9.53	m6: Oxidation (+15.99)	544.259	1086.5	1087.51	2	0.000143	0.1315	372	381	15
7516	188	PREDICTED: enolase 1 [Vitis vinifera]	gi|225441000	47856.4	0.405	DGGSDYLGK	58.2	40.9	9.5		456.21	910.405	911.411	2	0.001958	2.148	53	61	15
7516	188	PREDICTED: enolase 1 [Vitis vinifera]	gi|225441000	47856.4	0.405	HIANIAGNK	52.5	42.5	9.46		469.264	936.514	937.521	2	0.0001581	0.1686	138	146	15
7516	188	PREDICTED: enolase 1 [Vitis vinifera]	gi|225441000	47856.4	0.405	KYGQDATNVGDEGGFAPNIQENK	112	43.4	12.8		818.052	2451.14	2452.14	3	0.004412	1.799	204	226	15
7516	188	PREDICTED: enolase 1 [Vitis vinifera]	gi|225441000	47856.4	0.405	LAMQEFmILPIGAPSFK	42.6	44.4	0	m7: Oxidation (+15.99)	955.01	1908.01	1909	2	0.01666	8.729	168	184	15
7516	188	PREDICTED: enolase 1 [Vitis vinifera]	gi|225441000	47856.4	0.405	LTcEIGEK	48.3	43.7	6.71	c3: Carbamidomethyl (+57.02)	475.235	948.455	949.466	2	-0.004047	-4.263	314	321	15
7516	188	PREDICTED: enolase 1 [Vitis vinifera]	gi|225441000	47856.4	0.405	mGVEVYHHLK	35.5	43.7	0.608	m1: Oxidation (+15.99)	410.211	1227.61	1228.61	3	0.002827	2.301	189	198	15
7516	188	PREDICTED: enolase 1 [Vitis vinifera]	gi|225441000	47856.4	0.405	QIFDSR	42.6	44.5	0.601		383.198	764.382	765.389	2	1.806e-05	0.02359	11	16	15
7516	188	PREDICTED: enolase 1 [Vitis vinifera]	gi|225441000	47856.4	0.405	SGETEDTFIADLSVGLATGQIK	71.7	45.4	0		1126.58	2251.14	2252.13	2	0.0218	9.679	382	403	15
7516	188	PREDICTED: enolase 1 [Vitis vinifera]	gi|225441000	47856.4	0.405	TYDLNFK	29.5	41.4	4.49		450.727	899.44	900.446	2	0.0009181	1.02	262	268	15
7516	188	PREDICTED: enolase 1 [Vitis vinifera]	gi|225441000	47856.4	0.405	TYDLNFKEENNDGSEK	87.4	40	15.2		951.924	1901.83	1902.84	2	0.004938	2.595	262	277	15
7516	188	PREDICTED: enolase 1 [Vitis vinifera]	gi|225441000	47856.4	0.405	VNQIGTVTESIEAVK	95.1	44.7	11.6		794.437	1586.86	1587.86	2	0.007738	4.873	353	367	15
7516	188	PREDICTED: enolase 1 [Vitis vinifera]	gi|225441000	47856.4	0.405	YGQDATNVGDEGGFAPNIQENK	102	41.4	12		1162.53	2323.04	2324.04	2	0.004018	1.729	205	226	15
7516	188	PREDICTED: enolase 1 [Vitis vinifera]	gi|225441000	47856.4	0.405	YNQLLR	45.9	43.8	1.79		403.73	805.446	806.452	2	0.001398	1.734	416	421	15
7516	188	PREDICTED: phospho-2-dehydro-3-deoxyheptonate aldolase 2, chloroplastic [Vitis vinifera]	gi|225459235,gi|262181539,gi|302141986,gi|37359244	60153.4	0.0529	GVANPLGIK	39.5	38.3	4.87		434.765	867.515	868.525	2	-0.002442	-2.812	370	378	2
7516	188	PREDICTED: phospho-2-dehydro-3-deoxyheptonate aldolase 2, chloroplastic [Vitis vinifera]	gi|225459235,gi|262181539,gi|302141986,gi|37359244	60153.4	0.0529	TVTFDDLSSR	46.6	42.7	6.03		570.779	1139.54	1140.55	2	-0.003062	-2.685	498	507	2
7516	188	PREDICTED: enolase 1, chloroplastic-like [Vitis vinifera]	gi|225455784,gi|297734136	50540.1	0.0614	AcNALLLK	43.8	46.6	9.2	c2: Carbamidomethyl (+57.02)	451.759	901.503	902.513	2	-0.002487	-2.756	378	385	2
7516	188	PREDICTED: enolase 1, chloroplastic-like [Vitis vinifera]	gi|225455784,gi|297734136	50540.1	0.0614	IEEELGHVR	34.4	44.5	2.22		361.192	1080.55	1081.56	3	-0.001578	-1.459	455	463	2
7516	188	PREDICTED: enolase 1, chloroplastic-like [Vitis vinifera]	gi|225455784,gi|297734136	50540.1	0.0614	QIIDSR	41.2	46.9	-0.513		366.206	730.397	731.405	2	-0.0005219	-0.7136	53	58	2
7516	188	PREDICTED: enolase 1, chloroplastic-like [Vitis vinifera]	gi|225455784,gi|297734136	50540.1	0.0614	YNQLLR	45.9	43.8	1.79		403.73	805.446	806.452	2	0.001398	1.734	449	454	2
7516	188	ATPase subunit 1 [Vitis vinifera]	gi|224365668	55126.8	0.193	APGIIER	60.1	40.4	3.54		378.224	754.434	755.441	2	-1.942e-06	-0.00257	135	141	12
7516	188	ATPase subunit 1 [Vitis vinifera]	gi|224365668	55126.8	0.193	AVDSLVPIGR	62.9	41.5	8.94		513.802	1025.59	1026.59	2	0.001898	1.849	154	163	12
7516	188	ATPase subunit 1 [Vitis vinifera]	gi|224365668	55126.8	0.193	ELIIGDR	36.6	44.5	3.45		408.235	814.455	815.462	2	0.0003781	0.4636	167	173	12
7516	188	ATPase subunit 1 [Vitis vinifera]	gi|224365668	55126.8	0.193	GALSDHER	53.2	41.7	1.47		442.716	883.417	884.422	2	0.002138	2.417	121	128	12
7516	188	ATPase subunit 1 [Vitis vinifera]	gi|224365668	55126.8	0.193	ITNFYTNLK	51	43.2	10.2		557.3	1112.59	1113.59	2	-0.001042	-0.9357	18	26	12
7516	188	ATPase subunit 1 [Vitis vinifera]	gi|224365668	55126.8	0.193	MPLDR	36.6	42.1	0		316.166	630.317	631.323	2	0.0005781	0.9156	459	463	12
7516	188	ATPase subunit 1 [Vitis vinifera]	gi|224365668	55126.8	0.193	QAVAYR	31.5	46	-0.388		354.195	706.375	707.383	2	-0.001002	-1.416	277	282	12
7516	188	ATPase subunit 1 [Vitis vinifera]	gi|224365668	55126.8	0.193	QPQYAPLPIEK	62.4	43.3	8.56		642.358	1282.7	1283.7	2	0.009438	7.352	433	443	12
7516	188	ATPase subunit 1 [Vitis vinifera]	gi|224365668	55126.8	0.193	SVHEPMQTGLK	34.6	44.3	0		613.813	1225.61	1226.62	2	-0.0006819	-0.556	143	153	12
7516	188	ATPase subunit 1 [Vitis vinifera]	gi|224365668	55126.8	0.193	VDEIGR	36.2	44.5	1.67		344.685	687.355	688.362	2	3.806e-05	0.05529	27	32	12
7516	188	ATPase subunit 1 [Vitis vinifera]	gi|224365668	55126.8	0.193	VGSAAQLK	36.5	46.5	0.934		387.231	772.447	773.452	2	0.002818	3.643	377	384	12
7516	188	ATPase subunit 1 [Vitis vinifera]	gi|224365668	55126.8	0.193	VVSVGDGIAR	59.2	46.2	5.74		486.779	971.543	972.547	2	0.002618	2.692	33	42	12
7516	188	RecName: Full=Ribulose bisphosphate carboxylase large chain; Short=RuBisCO large subunit; Flags: Precursor	gi|115311623,gi|147769051,gi|46275228	52501.5	0.345	AMHAVIDR	37.9	42.2	0		304.83	911.468	912.472	3	0.003132	3.432	296	303	13
7516	188	RecName: Full=Ribulose bisphosphate carboxylase large chain; Short=RuBisCO large subunit; Flags: Precursor	gi|115311623,gi|147769051,gi|46275228	52501.5	0.345	AVFAR	25.9	38.7	0		282.169	562.323	563.33	2	1.806e-05	0.03206	254	258	13
7516	188	RecName: Full=Ribulose bisphosphate carboxylase large chain; Short=RuBisCO large subunit; Flags: Precursor	gi|115311623,gi|147769051,gi|46275228	52501.5	0.345	AVYEcLR	31.8	43.1	2.92	c5: Carbamidomethyl (+57.02)	455.726	909.438	910.445	2	0.0005528	0.6071	188	194	13
7516	188	RecName: Full=Ribulose bisphosphate carboxylase large chain; Short=RuBisCO large subunit; Flags: Precursor	gi|115311623,gi|147769051,gi|46275228	52501.5	0.345	DDENVNSQPFMR	64.3	38.2	0		726.314	1450.61	1451.62	2	-0.001922	-1.324	202	213	13
7516	188	RecName: Full=Ribulose bisphosphate carboxylase large chain; Short=RuBisCO large subunit; Flags: Precursor	gi|115311623,gi|147769051,gi|46275228	52501.5	0.345	DDFVEKDR	52.1	42.9	6.35		512.242	1022.47	1023.47	2	0.002578	2.519	351	358	13
7516	188	RecName: Full=Ribulose bisphosphate carboxylase large chain; Short=RuBisCO large subunit; Flags: Precursor	gi|115311623,gi|147769051,gi|46275228	52501.5	0.345	EGNEIIR	43.1	43.4	3.37		415.723	829.431	830.437	2	0.001618	1.948	440	446	13
7516	188	RecName: Full=Ribulose bisphosphate carboxylase large chain; Short=RuBisCO large subunit; Flags: Precursor	gi|115311623,gi|147769051,gi|46275228	52501.5	0.345	GGLDFTKDDENVNSQPFmR	18.5	41.2	7.02	m18: Oxidation (+15.99)	729.332	2184.97	2185.98	3	-0.001943	-0.8888	195	213	13
7516	188	RecName: Full=Ribulose bisphosphate carboxylase large chain; Short=RuBisCO large subunit; Flags: Precursor	gi|115311623,gi|147769051,gi|46275228	52501.5	0.345	GHYLNATAGTcEEmIK	59.4	41.2	11	c11: Carbamidomethyl (+57.02), m14: Oxidation (+15.99)	604.275	1809.8	1810.81	3	-0.0004483	-0.2475	237	252	13
7516	188	RecName: Full=Ribulose bisphosphate carboxylase large chain; Short=RuBisCO large subunit; Flags: Precursor	gi|115311623,gi|147769051,gi|46275228	52501.5	0.345	LSGGDHIHAGTVVGK	22.6	45.5	8.44		483.261	1446.76	1447.77	3	0.003122	2.156	320	334	13
7516	188	RecName: Full=Ribulose bisphosphate carboxylase large chain; Short=RuBisCO large subunit; Flags: Precursor	gi|115311623,gi|147769051,gi|46275228	52501.5	0.345	LTYYTPEYETKPTDILAAFR	95.9	45.3	13.8		1196.61	2391.2	2392.21	2	0.003538	1.479	22	41	13
7516	188	RecName: Full=Ribulose bisphosphate carboxylase large chain; Short=RuBisCO large subunit; Flags: Precursor	gi|115311623,gi|147769051,gi|46275228	52501.5	0.345	SQAETGEIK	30.5	45.5	3.57		481.744	961.474	962.479	2	0.001958	2.034	228	236	13
7516	188	RecName: Full=Ribulose bisphosphate carboxylase large chain; Short=RuBisCO large subunit; Flags: Precursor	gi|115311623,gi|147769051,gi|46275228	52501.5	0.345	TFQGPPHGIQVER	63.7	45.2	9.56		733.385	1464.75	1465.75	2	0.007278	4.965	147	159	13
7516	188	RecName: Full=Ribulose bisphosphate carboxylase large chain; Short=RuBisCO large subunit; Flags: Precursor	gi|115311623,gi|147769051,gi|46275228	52501.5	0.345	YGRPLLGcTIKPK	24.6	43	7.87	c8: Carbamidomethyl (+57.02)	501.623	1501.85	1502.85	3	0.002877	1.914	165	177	13
7516	188	PREDICTED: dihydrolipoyllysine-residue acetyltransferase component of pyruvate dehydrogenase complex, mitochondrial-like isoform 1 [Vitis vinifera]	gi|225460716	49570	0.086	ATALALVK	31.1	41.3	6.13		393.756	785.498	786.508	2	-0.003122	-3.969	313	320	4
7516	188	PREDICTED: dihydrolipoyllysine-residue acetyltransferase component of pyruvate dehydrogenase complex, mitochondrial-like isoform 1 [Vitis vinifera]	gi|225460716	49570	0.086	IVASPYAK	52.1	44.2	5.78		424.746	847.478	848.488	2	-0.002482	-2.925	187	194	4
7516	188	PREDICTED: dihydrolipoyllysine-residue acetyltransferase component of pyruvate dehydrogenase complex, mitochondrial-like isoform 1 [Vitis vinifera]	gi|225460716	49570	0.086	MASSVHPASEGGK	34	41.9	0		419.869	1256.59	1257.59	3	0.004522	3.596	173	185	4
7516	188	PREDICTED: dihydrolipoyllysine-residue acetyltransferase component of pyruvate dehydrogenase complex, mitochondrial-like isoform 1 [Vitis vinifera]	gi|225460716	49570	0.086	SQmQVNVTADHR	65.1	41.8	11.4	m3: Oxidation (+15.99)	467.887	1400.64	1401.65	3	-0.006613	-4.718	440	451	4
7516	188	hypothetical protein VITISV_018718 [Vitis vinifera]	gi|147838606,gi|225424142,gi|225456079	59910.5	0.0786	FDEGLPPILTALEVLDNSIR	44.9	43.4	10.6		738.07	2211.19	2212.19	3	0.01039	4.698	101	120	2
7516	188	hypothetical protein VITISV_018718 [Vitis vinifera]	gi|147838606,gi|225424142,gi|225456079	59910.5	0.0786	VLNTGSPITVPVGR	72.3	40.3	12.6		705.412	1408.81	1409.81	2	0.005058	3.588	151	164	2
7516	188	catalase [Vitis vinifera]	gi|19070130,gi|359476986	56963	0.122	AGNYPEWK	29.4	42.9	4.65		482.728	963.441	964.452	2	-0.003722	-3.859	261	268	7
7516	188	catalase [Vitis vinifera]	gi|19070130,gi|359476986	56963	0.122	APGVQTPVIVR	38.8	38.3	8.39		568.846	1135.68	1136.68	2	0.006538	5.752	92	102	7
7516	188	catalase [Vitis vinifera]	gi|19070130,gi|359476986	56963	0.122	cLLEDEAIR	39.9	44.1	6.14	c1: Carbamidomethyl (+57.02)	559.779	1117.54	1118.55	2	-0.001427	-1.276	234	242	7
7516	188	catalase [Vitis vinifera]	gi|19070130,gi|359476986	56963	0.122	FSTVIHER	44.8	45	0.037		330.178	987.514	988.521	3	-3.794e-05	-0.03838	103	110	7
7516	188	catalase [Vitis vinifera]	gi|19070130,gi|359476986	56963	0.122	IFAYSDTQR	45.4	42.9	7.73		550.776	1099.54	1100.54	2	0.007678	6.977	345	353	7
7516	188	catalase [Vitis vinifera]	gi|19070130,gi|359476986	56963	0.122	SFAPDR	44.2	44.8	0.854		346.673	691.331	692.336	2	0.001878	2.713	437	442	7
7516	188	catalase [Vitis vinifera]	gi|19070130,gi|359476986	56963	0.122	WVETLSDPR	53.6	44.4	9.63		551.781	1101.55	1102.55	2	0.001358	1.232	450	458	7
7516	188	PREDICTED: enolase [Vitis vinifera]	gi|225455555	48092.9	0.342	AcNALLLK	43.8	46.6	9.2	c2: Carbamidomethyl (+57.02)	451.759	901.503	902.513	2	-0.002487	-2.756	346	353	2
7516	188	PREDICTED: enolase [Vitis vinifera]	gi|225455555	48092.9	0.342	AGWGVmASHR	76.7	40.9	9.53	m6: Oxidation (+15.99)	544.259	1086.5	1087.51	2	0.000143	0.1315	373	382	2
7516	188	PREDICTED: enolase [Vitis vinifera]	gi|225455555	48092.9	0.342	HIANLAGNK	52.5	42.5	9.46		469.264	936.514	937.521	2	0.0001581	0.1686	138	146	2
7516	188	PREDICTED: enolase [Vitis vinifera]	gi|225455555	48092.9	0.342	IEEELGSAAVYAGAK	111	45.3	12.6		754.387	1506.76	1507.76	2	0.003418	2.267	423	437	2
7516	188	PREDICTED: enolase [Vitis vinifera]	gi|225455555	48092.9	0.342	KYGQDATNVGDEGGFAPNIQENK	112	43.4	12.8		818.052	2451.14	2452.14	3	0.004412	1.799	204	226	2
7516	188	PREDICTED: enolase [Vitis vinifera]	gi|225455555	48092.9	0.342	mGVEVYHHLK	35.5	43.7	0.608	m1: Oxidation (+15.99)	410.211	1227.61	1228.61	3	0.002827	2.301	189	198	2
7516	188	PREDICTED: enolase [Vitis vinifera]	gi|225455555	48092.9	0.342	QIFDSR	42.6	44.5	0.601		383.198	764.382	765.389	2	1.806e-05	0.02359	11	16	2
7516	188	PREDICTED: enolase [Vitis vinifera]	gi|225455555	48092.9	0.342	SGETEDTFIADLSVGLATGQIK	71.7	45.4	0		1126.58	2251.14	2252.13	2	0.0218	9.679	383	404	2
7516	188	PREDICTED: enolase [Vitis vinifera]	gi|225455555	48092.9	0.342	TYDLNFK	29.5	41.4	4.49		450.727	899.44	900.446	2	0.0009181	1.02	263	269	2
7516	188	PREDICTED: enolase [Vitis vinifera]	gi|225455555	48092.9	0.342	VNQIGSVTESIEAVK	43	45.3	9.84		525.285	1572.83	1573.84	3	-0.003338	-2.121	354	368	2
7516	188	PREDICTED: enolase [Vitis vinifera]	gi|225455555	48092.9	0.342	YGQDATNVGDEGGFAPNIQENK	102	41.4	12		1162.53	2323.04	2324.04	2	0.004018	1.729	205	226	2
7516	188	PREDICTED: enolase [Vitis vinifera]	gi|225455555	48092.9	0.342	YNQLLR	45.9	43.8	1.79		403.73	805.446	806.452	2	0.001398	1.734	417	422	2

## Sheet: Feuil2
Supplemental Table 1b.
spot	sample name	Protein name	Protein accession numbers	Protein molecular weight (Da)	Percentage sequence coverage	Peptide sequence	Best Mascot Ion score	Mascot Identity score	OMSSA -log(e) score	Variable modifications identified by spectrum	Observed m/z	Actual peptide mass (AMU)	Calculated +1H Peptide Mass (AMU)	Spectrum charge	Actual minus calculated peptide mass (AMU)	Actual minus calculated peptide mass (PPM)	Peptide start index	Peptide stop index	Number of unique peptides
0309	189	PREDICTED: uncharacterized protein LOC100232885 [Vitis vinifera]	gi|225447003	18414	0.78	AEETPVEEVAAAPPTPEPVAEEPK	79.6	42.6	11.1		829.745	2486.21	2487.21	3	0.005572	2.24	24	47	7
0309	189	PREDICTED: uncharacterized protein LOC100232885 [Vitis vinifera]	gi|225447003	18414	0.78	EAETAAVPEESAAPEAEAPADQDETK	51	38.3	10.3		886.063	2655.17	2656.17	3	0.001182	0.445	48	73	7
0309	189	PREDICTED: uncharacterized protein LOC100232885 [Vitis vinifera]	gi|225447003	18414	0.78	EATEPAEEPAPKPEPAPADEAPK	98.8	42.4	14.3		791.049	2370.12	2371.13	3	0.001652	0.6967	125	147	7
0309	189	PREDICTED: uncharacterized protein LOC100232885 [Vitis vinifera]	gi|225447003	18414	0.78	EEGPAAEEEEKPAEAK	78.3	40.9	10.8		571.931	1712.77	1713.78	3	-0.003038	-1.773	148	163	7
0309	189	PREDICTED: uncharacterized protein LOC100232885 [Vitis vinifera]	gi|225447003	18414	0.78	EVVEQVEVETK	58.6	44.2	10.5		644.834	1287.65	1288.66	2	-0.001742	-1.352	74	84	7
0309	189	PREDICTED: uncharacterized protein LOC100232885 [Vitis vinifera]	gi|225447003	18414	0.78	TDQAVVEEPAVEK	60.5	43.3	8.11		472.241	1413.7	1414.71	3	0.003082	2.179	90	102	7
0309	189	PREDICTED: uncharacterized protein LOC100232885 [Vitis vinifera]	gi|225447003	18414	0.78	TEEVPEETPDQETNSPVVEETK	77.1	39.9	11.6		829.713	2486.12	2487.13	3	-0.001618	-0.6505	103	124	7
4421	190	hypothetical protein VITISV_041911 [Vitis vinifera]	gi|147768273,gi|359473032,gi|359473034	39024.9	0.191	EHISAYGEGNER	35.2	40	6.44		454.542	1360.61	1361.61	3	0.004422	3.248	279	290	6
4421	190	hypothetical protein VITISV_041911 [Vitis vinifera]	gi|147768273,gi|359473032,gi|359473034	39024.9	0.191	GDWNGAGAHTNYSTK	35.6	38.6	6.63		526.902	1577.68	1578.69	3	-0.002338	-1.481	241	255	6
4421	190	hypothetical protein VITISV_041911 [Vitis vinifera]	gi|147768273,gi|359473032,gi|359473034	39024.9	0.191	HETADINTFcWGVANR	83.7	40.7	10	c10: Carbamidomethyl (+57.02)	630.957	1889.85	1890.86	3	0.002737	1.447	296	311	6
4421	190	hypothetical protein VITISV_041911 [Vitis vinifera]	gi|147768273,gi|359473032,gi|359473034	39024.9	0.191	HKEHISAYGEGNER	34.9	42.5	11.7		542.926	1625.76	1626.76	3	0.002432	1.495	277	290	6
4421	190	hypothetical protein VITISV_041911 [Vitis vinifera]	gi|147768273,gi|359473032,gi|359473034	39024.9	0.191	NTGGYDVIK	43.8	43	6.64		483.748	965.482	966.489	2	0.0003781	0.3912	259	267	6
4421	190	hypothetical protein VITISV_041911 [Vitis vinifera]	gi|147768273,gi|359473032,gi|359473034	39024.9	0.191	TLSGPVTGPAQLPK	55.8	39.5	11.8		683.392	1364.77	1365.77	2	0.003358	2.459	39	52	6
4421	190	PREDICTED: glutelin type-A 1 [Vitis vinifera]	gi|225435090	38331.2	0.449	AGSLFIVPR	66	42.2	5.83		480.288	958.561	959.567	2	0.001318	1.374	275	283	12
4421	190	PREDICTED: glutelin type-A 1 [Vitis vinifera]	gi|225435090	38331.2	0.449	AWDLEEDVVK	31.5	43.6	9.4		602.3	1202.58	1203.59	2	0.002558	2.125	148	157	12
4421	190	PREDICTED: glutelin type-A 1 [Vitis vinifera]	gi|225435090	38331.2	0.449	EDTDLEVLFLGDTSK	85.3	43.6	12.6		841.417	1680.82	1681.82	2	0.009698	5.766	104	118	12
4421	190	PREDICTED: glutelin type-A 1 [Vitis vinifera]	gi|225435090	38331.2	0.449	FFVVSK	36.3	41.2	2.31		363.713	725.412	726.418	2	0.001258	1.732	284	289	12
4421	190	PREDICTED: glutelin type-A 1 [Vitis vinifera]	gi|225435090	38331.2	0.449	IGDPEGMDWFSIITTPNPIFTHLAGR	59	42.3	0		962.482	2884.42	2885.43	3	0.001842	0.6384	290	315	12
4421	190	PREDICTED: glutelin type-A 1 [Vitis vinifera]	gi|225435090	38331.2	0.449	IILHQHGFALPSYSDSSK	56.3	43.1	10.9		667.346	1999.02	2000.02	3	0.0003321	0.166	42	59	12
4421	190	PREDICTED: glutelin type-A 1 [Vitis vinifera]	gi|225435090	38331.2	0.449	LEGTFEmPEPK	53.6	42.3	10.5	m7: Oxidation (+15.99)	647.304	1292.59	1293.6	2	-0.002497	-1.93	171	181	12
4421	190	PREDICTED: glutelin type-A 1 [Vitis vinifera]	gi|225435090	38331.2	0.449	NADAIFFPPPN	38.8	42.6	11		601.796	1201.58	1202.58	2	0.0009381	0.78	346	356	12
4421	190	PREDICTED: glutelin type-A 1 [Vitis vinifera]	gi|225435090	38331.2	0.449	VLEASFSVGSDMEK	101	42.4	0		749.86	1497.7	1498.71	2	0.002418	1.613	326	339	12
4421	190	PREDICTED: glutelin type-A 1 [Vitis vinifera]	gi|225435090	38331.2	0.449	VLETTLK	47.3	37.2	3.73		402.248	802.482	803.487	2	0.001978	2.462	268	274	12
4421	190	PREDICTED: glutelin type-A 1 [Vitis vinifera]	gi|225435090	38331.2	0.449	VQVVGVDGHR	78.5	41.7	9.33		533.295	1064.58	1065.58	2	0.002918	2.738	258	267	12
4421	190	PREDICTED: glutelin type-A 1 [Vitis vinifera]	gi|225435090	38331.2	0.449	VVVLNTQNLPLVGEVGLGADLVR	104	32.1	13.5		1188.19	2374.37	2375.37	2	0.006738	2.837	207	229	12
4421	190	PREDICTED: cysteine synthase isoform 2 [Vitis vinifera]	gi|225451235	34371	0.0585	DVTELIGK	28.6	44.5	5.5		437.747	873.48	874.488	2	-0.0009019	-1.031	11	18	2
4421	190	PREDICTED: cysteine synthase isoform 2 [Vitis vinifera]	gi|225451235	34371	0.0585	YLSSVLFDSVK	62.3	43.5	8.95		629.34	1256.66	1257.67	2	-0.0003019	-0.2401	305	315	2
5016	192	hypothetical protein VITISV_012137 [Vitis vinifera]	gi|147772890,gi|147777147,gi|147792985,gi|147792986,gi|147798417,gi|147798418,gi|147820772,gi|147844221,gi|225429600,gi|225429610,gi|225429614,gi|269838636,gi|296081688,gi|359476263	17340.5	0.186	AMAATPADVK	43.5	44.8	0		487.752	973.49	974.498	2	-0.0003019	-0.3098	43	52	4
5016	192	hypothetical protein VITISV_012137 [Vitis vinifera]	gi|147772890,gi|147777147,gi|147792985,gi|147792986,gi|147798417,gi|147798418,gi|147820772,gi|147844221,gi|225429600,gi|225429610,gi|225429614,gi|269838636,gi|296081688,gi|359476263	17340.5	0.186	FVLPENANTDK	59.6	44.2	8.13		624.318	1246.62	1247.63	2	0.001778	1.425	113	123	4
5016	192	hypothetical protein VITISV_012137 [Vitis vinifera]	gi|147772890,gi|147777147,gi|147792985,gi|147792986,gi|147798417,gi|147798418,gi|147820772,gi|147844221,gi|225429600,gi|225429610,gi|225429614,gi|269838636,gi|296081688,gi|359476263	17340.5	0.186	KFVLPENANTDK	60.6	44.2	11.4		459.245	1374.71	1375.72	3	-0.001088	-0.7908	112	123	4
5016	192	hypothetical protein VITISV_012137 [Vitis vinifera]	gi|147772890,gi|147777147,gi|147792985,gi|147792986,gi|147798417,gi|147798418,gi|147820772,gi|147844221,gi|225429600,gi|225429610,gi|225429614,gi|269838636,gi|296081688,gi|359476263	17340.5	0.186	LPPPEPK	44	41.8	2		389.228	776.442	777.451	2	-0.001162	-1.495	140	146	4
5016	192	hypothetical protein VITISV_019370 [Vitis vinifera]	gi|147798422,gi|225449250	18147.3	0.497	AAMEDGVLTVTVPK	89	43.8	0		715.884	1429.75	1430.76	2	0.004938	3.451	131	144	7
5016	192	hypothetical protein VITISV_019370 [Vitis vinifera]	gi|147798422,gi|225449250	18147.3	0.497	ETPNSHVFK	43.5	42.6	6.01		529.767	1057.52	1058.53	2	0.0009981	0.9429	58	66	7
5016	192	hypothetical protein VITISV_019370 [Vitis vinifera]	gi|147798422,gi|225449250	18147.3	0.497	FRLPEDAK	38	44.5	6.77		488.266	974.518	975.526	2	-0.0002819	-0.289	118	125	7
5016	192	hypothetical protein VITISV_019370 [Vitis vinifera]	gi|147798422,gi|225449250	18147.3	0.497	KEELKVEVEDGR	0	0	11.4		477.587	1429.74	1430.75	3	-0.002286	-1.598	74	85	7
5016	192	hypothetical protein VITISV_019370 [Vitis vinifera]	gi|147798422,gi|225449250	18147.3	0.497	SGFPAETSSFVQAR	92.5	43	12.9		742.364	1482.71	1483.72	2	0.002738	1.845	40	53	7
5016	192	hypothetical protein VITISV_019370 [Vitis vinifera]	gi|147798422,gi|225449250	18147.3	0.497	SLSDQIR	47.8	46.2	3.32		409.723	817.431	818.437	2	0.001458	1.782	33	39	7
5016	192	hypothetical protein VITISV_019370 [Vitis vinifera]	gi|147798422,gi|225449250	18147.3	0.497	SSGSFLR	58.7	43	3.25		377.198	752.382	753.389	2	0.0004981	0.6611	110	116	7
5016	192	hypothetical protein VITISV_019370 [Vitis vinifera]	gi|147798422,gi|225449250	18147.3	0.497	VLQISGQR	47.5	43.8	6.12		450.767	899.52	900.526	2	0.001438	1.597	86	93	7
5016	192	pathogenesis-related protein 10 [Vitis hybrid cultivar]	gi|163914213,gi|225431844,gi|334089964	17108.6	0.146	AAVLDADNLIPK	35	40.8	8.21		620.352	1238.69	1239.69	2	0.001338	1.079	22	33	2
5016	192	pathogenesis-related protein 10 [Vitis hybrid cultivar]	gi|163914213,gi|225431844,gi|334089964	17108.6	0.146	GGKEDALATFK	76.6	45	12.3		568.801	1135.59	1136.59	2	-0.0007619	-0.6704	135	145	2
5016	192	PREDICTED: eukaryotic translation initiation factor 5A-2-like [Vitis vinifera]	gi|359491680	17413.7	0.0755	LPTDDNLLTQIK	56	41.8	11.1		685.882	1369.75	1370.75	2	0.004458	3.252	117	128	1
5018	193	PREDICTED: MLP-like protein 34 [Vitis vinifera]	gi|225424277	17080.7	0.768	AIVQTISK	57.1	40.5	6		430.268	858.522	859.525	2	0.003998	4.651	101	108	8
5018	193	PREDICTED: MLP-like protein 34 [Vitis vinifera]	gi|225424277	17080.7	0.768	EIVEAIDK	66.9	43.6	7.82		458.754	915.493	916.499	2	0.001378	1.504	71	78	8
5018	193	PREDICTED: MLP-like protein 34 [Vitis vinifera]	gi|225424277	17080.7	0.768	EIVEAIDKENK	73.2	44.2	10.8		644.343	1286.67	1287.68	2	0.0003581	0.2781	71	81	8
5018	193	PREDICTED: MLP-like protein 34 [Vitis vinifera]	gi|225424277	17080.7	0.768	FHEVWGGRPHHmSSVSPGK	28.3	42.8	10.7	m12: Oxidation (+15.99)	537.761	2147.02	2148.02	4	0.003031	1.411	20	38	8
5018	193	PREDICTED: MLP-like protein 34 [Vitis vinifera]	gi|225424277	17080.7	0.768	GETTWVR	40.7	45.2	1.96		424.717	847.419	848.426	2	0.0004981	0.587	109	115	8
5018	193	PREDICTED: MLP-like protein 34 [Vitis vinifera]	gi|225424277	17080.7	0.768	LEAEILILAPADK	101	36.8	12.9		698.411	1394.81	1395.81	2	0.005958	4.269	7	19	8
5018	193	PREDICTED: MLP-like protein 34 [Vitis vinifera]	gi|225424277	17080.7	0.768	LLGFVIHmNEELDDHLIQA	38.5	43	8.41	m8: Oxidation (+15.99)	1112.06	2222.11	2223.11	2	0.006463	2.907	133	151	8
5018	193	PREDICTED: MLP-like protein 34 [Vitis vinifera]	gi|225424277	17080.7	0.768	VDLHEGDWGTVGSVIEWSYVIDGK	71.9	42.5	12.8		887.768	2660.28	2661.28	3	0.006752	2.537	42	65	8
5018	193	PREDICTED: MLP-like protein 34 [Vitis vinifera]	gi|225424277	17080.7	0.768	VIEGDLLK	30.8	40.7	6.24		443.767	885.519	886.525	2	0.001278	1.442	87	94	8
5018	193	PREDICTED: MLP-like protein 34 [Vitis vinifera]	gi|225424277	17080.7	0.768	WTFEYEK	40.5	38.7	4.32		501.734	1001.45	1002.46	2	0.004238	4.228	116	122	8
5018	193	PREDICTED: superoxide dismutase [Cu-Zn] isoform 2 [Vitis vinifera]	gi|225451120	15281.4	0.296	AVVVHADPDDLGK	79.9	43.9	11.3		668.349	1334.68	1335.69	2	0.0005781	0.4328	115	127	3
5018	193	PREDICTED: superoxide dismutase [Cu-Zn] isoform 2 [Vitis vinifera]	gi|225451120	15281.4	0.296	HAGDLGNVIVGEDGTVNFK	59.3	43.7	11.6		647.994	1940.96	1941.97	3	-0.0002279	-0.1174	79	97	3
5018	193	PREDICTED: superoxide dismutase [Cu-Zn] isoform 2 [Vitis vinifera]	gi|225451120	15281.4	0.296	QIPLTGSNSIVGR	34.3	41.6	7.2		671.379	1340.74	1341.75	2	0.002838	2.115	102	114	3
5018	193	PREDICTED: ubiquitin-conjugating enzyme E2-17 kDa-like isoform 1 [Vitis vinifera]	gi|225426040,gi|225428025,gi|225434319,gi|225440288,gi|225462031,gi|328857850,gi|331217117,gi|358054344,gi|359481485,gi|375170400	16548.8	0.0743	EQWSPALTISK	55.3	44.3	10.9		630.336	1258.66	1259.66	2	0.002458	1.951	91	101	1
5018	193	PREDICTED: ubiquitin-conjugating enzyme E2 35 isoform 1 [Vitis vinifera]	gi|225461646	17220.9	0.386	IcLDILK	36.3	41.7	6.28	c2: Carbamidomethyl (+57.02)	437.758	873.501	874.507	2	0.001313	1.501	88	94	1
5018	193	PREDICTED: ubiquitin-conjugating enzyme E2 35 isoform 1 [Vitis vinifera]	gi|225461646	17220.9	0.386	IYHPNIDK	40.1	42.2	8.58		500.267	998.519	999.526	2	0.0006781	0.6784	77	84	1
5018	193	PREDICTED: ubiquitin-conjugating enzyme E2 35 isoform 1 [Vitis vinifera]	gi|225461646	17220.9	0.386	TNEAEAVETAK	90	43.2	10.4		581.782	1161.55	1162.56	2	-0.002222	-1.911	133	143	1
5018	193	PREDICTED: ubiquitin-conjugating enzyme E2 35 isoform 1 [Vitis vinifera]	gi|225461646	17220.9	0.386	TVLLSIQALLSAPNPDDPLSENIAK	39	38.1	9.59		873.812	2618.42	2619.42	3	-0.001548	-0.5909	105	129	1
5018	193	PREDICTED: ubiquitin-conjugating enzyme E2 35 isoform 1 [Vitis vinifera]	gi|225461646	17220.9	0.386	WSPALQIR	35.2	40.9	5.65		485.776	969.538	970.547	2	-0.001662	-1.712	97	104	1
5018	193	PREDICTED: glycine-rich RNA-binding protein GRP1A-like [Vitis vinifera]	gi|359475330	16329.7	0.173	GGGGGYGGGGGGYGGGSR	53.3	35.7	12.8		693.792	1385.57	1386.58	2	-0.002562	-1.848	121	138	2
5018	193	PREDICTED: glycine-rich RNA-binding protein GRP1A-like [Vitis vinifera]	gi|359475330	16329.7	0.173	NITVNEAQSR	46.3	43.6	8.61		566.292	1130.57	1131.58	2	0.0009781	0.8643	78	87	2
5018	193	unnamed protein product [Vitis vinifera]	gi|297737681,gi|359472853	35245.1	0.228	FHEVWGGRPHHmSSVSPGK	28.3	42.8	10.7	m12: Oxidation (+15.99)	537.761	2147.02	2148.02	4	0.003031	1.411	20	38	2
5018	193	unnamed protein product [Vitis vinifera]	gi|297737681,gi|359472853	35245.1	0.228	GEATWVR	48.4	45.6	4.26		409.712	817.41	818.416	2	0.002178	2.661	109	115	2
5018	193	unnamed protein product [Vitis vinifera]	gi|297737681,gi|359472853	35245.1	0.228	LEAEILILAPADK	101	36.8	12.9		698.411	1394.81	1395.81	2	0.005958	4.269	7	19	2
5018	193	unnamed protein product [Vitis vinifera]	gi|297737681,gi|359472853	35245.1	0.228	VDLHEGDWGNVGSVIEWSYVIDGK	106	42.3	11.1		1337.65	2673.28	2674.28	2	0.008438	3.155	42	65	2
5018	193	unnamed protein product [Vitis vinifera]	gi|297737681,gi|359472853	35245.1	0.228	VIEGDILK	30.8	40.7	6.24		443.767	885.519	886.525	2	0.001278	1.442	87	94	2
5018	193	PREDICTED: ubiquitin-conjugating enzyme E2 36 isoform 1 [Vitis vinifera]	gi|225446595,gi|225446597,gi|359485284	17220.9	0.386	IcLDILK	36.3	41.7	6.28	c2: Carbamidomethyl (+57.02)	437.758	873.501	874.507	2	0.001313	1.501	88	94	5
5018	193	PREDICTED: ubiquitin-conjugating enzyme E2 36 isoform 1 [Vitis vinifera]	gi|225446595,gi|225446597,gi|359485284	17220.9	0.386	IYHPNIDK	40.1	42.2	8.58		500.267	998.519	999.526	2	0.0006781	0.6784	77	84	5
5018	193	PREDICTED: ubiquitin-conjugating enzyme E2 36 isoform 1 [Vitis vinifera]	gi|225446595,gi|225446597,gi|359485284	17220.9	0.386	SNEAEAVETAK	69.8	42.5	11.6		574.774	1147.53	1148.54	2	-0.002182	-1.9	133	143	5
5018	193	PREDICTED: ubiquitin-conjugating enzyme E2 36 isoform 1 [Vitis vinifera]	gi|225446595,gi|225446597,gi|359485284	17220.9	0.386	TVLLSIQALLSAPNPDDPLSENIAK	39	38.1	9.59		873.812	2618.42	2619.42	3	-0.001548	-0.5909	105	129	5
5018	193	PREDICTED: ubiquitin-conjugating enzyme E2 36 isoform 1 [Vitis vinifera]	gi|225446595,gi|225446597,gi|359485284	17220.9	0.386	WSPALQIR	35.2	40.9	5.65		485.776	969.538	970.547	2	-0.001662	-1.712	97	104	5
0207	194	hypothetical protein VITISV_022311 [Vitis vinifera]	gi|147816092,gi|359495543,gi|7406667	15388.1	0.238	AKEETTEEAAAAPAEEAAAK	58.7	42.4	9.72		663.32	1986.94	1987.95	3	-0.0008479	-0.4265	103	122	2
0207	194	hypothetical protein VITISV_022311 [Vitis vinifera]	gi|147816092,gi|359495543,gi|7406667	15388.1	0.238	EVVEEAAVEEAEAEK	53.5	42.1	8.11		816.386	1630.76	1631.76	2	0.0002181	0.1336	72	86	2
0207	194	unnamed protein product [Vitis vinifera]	gi|297737681,gi|359472853	35245.1	0.119	LEAEILILAPADK	74	37.7	12.5		698.409	1394.8	1395.81	2	0.001038	0.7437	7	19	2
0207	194	unnamed protein product [Vitis vinifera]	gi|297737681,gi|359472853	35245.1	0.119	VDLHEGDWGNVGSVIEWSYVIDGK	59.5	42.4	13.1		892.102	2673.28	2674.28	3	0.01151	4.305	42	65	2
5217	195	PREDICTED: stem-specific protein TSJT1 [Vitis vinifera]	gi|225432548	25253.9	0.466	DEIFSLFEGALDNLGSLR	70	43.1	11.8		998.505	1995	1996	2	0.0002981	0.1493	74	91	7
5217	195	PREDICTED: stem-specific protein TSJT1 [Vitis vinifera]	gi|225432548	25253.9	0.466	ITAEALmNR	65.5	45.1	7.09	m7: Oxidation (+15.99)	517.769	1033.52	1034.53	2	0.001563	1.511	28	36	7
5217	195	PREDICTED: stem-specific protein TSJT1 [Vitis vinifera]	gi|225432548	25253.9	0.466	ITAVPAPDEEIWGATFK	63.6	43.3	10.3		922.978	1843.94	1844.94	2	0.005338	2.893	209	225	7
5217	195	PREDICTED: stem-specific protein TSJT1 [Vitis vinifera]	gi|225432548	25253.9	0.466	SANEVVLVIEAYK	78.8	41.9	11.8		717.897	1433.78	1434.78	2	0.003698	2.577	99	111	7
5217	195	PREDICTED: stem-specific protein TSJT1 [Vitis vinifera]	gi|225432548	25253.9	0.466	SLASFPQGcFFSTAVGELR	83	43.1	11	c9: Carbamidomethyl (+57.02)	692.01	2073.01	2074.01	3	0.008087	3.899	182	200	7
5217	195	PREDICTED: stem-specific protein TSJT1 [Vitis vinifera]	gi|225432548	25253.9	0.466	VEGPAVFAATK	70.5	44.1	10.9		545.301	1088.59	1089.59	2	0.0006581	0.6039	226	236	7
5217	195	PREDICTED: stem-specific protein TSJT1 [Vitis vinifera]	gi|225432548	25253.9	0.466	VPLSWGITADGYVAFADDAELLK	59.3	42.4	11.6		817.751	2450.23	2451.24	3	-0.005888	-2.402	154	176	7
3723	196	PREDICTED: heat shock cognate 70 kDa protein isoform 1 [Vitis vinifera]	gi|225440324	71067	0.442	ATAGDTHLGGEDFDNR	115	38.5	13.2		559.247	1674.72	1675.73	3	-0.004858	-2.899	227	242	5
3723	196	PREDICTED: heat shock cognate 70 kDa protein isoform 1 [Vitis vinifera]	gi|225440324	71067	0.442	DAGVIAGLNVMR	61.8	43.7	0		608.332	1214.65	1215.65	2	0.004498	3.7	164	175	5
3723	196	PREDICTED: heat shock cognate 70 kDa protein isoform 1 [Vitis vinifera]	gi|225440324	71067	0.442	DNNLLGK	38.8	44.3	5.39		387.212	772.409	773.415	2	0.0004781	0.6181	458	464	5
3723	196	PREDICTED: heat shock cognate 70 kDa protein isoform 1 [Vitis vinifera]	gi|225440324	71067	0.442	EIAEAYLGSAVK	47	43.8	9.3		625.834	1249.65	1250.66	2	-0.002882	-2.304	133	144	5
3723	196	PREDICTED: heat shock cognate 70 kDa protein isoform 1 [Vitis vinifera]	gi|225440324	71067	0.442	ELESIcNPIIAK	46.5	43.3	8.68	c6: Carbamidomethyl (+57.02)	693.869	1385.72	1386.73	2	-4.724e-05	-0.03407	604	615	5
3723	196	PREDICTED: heat shock cognate 70 kDa protein isoform 1 [Vitis vinifera]	gi|225440324	71067	0.442	FEELNmDLFR	54.3	40.8	10.6	m6: Oxidation (+15.99)	665.311	1328.61	1329.61	2	-0.000497	-0.3738	308	317	5
3723	196	PREDICTED: heat shock cognate 70 kDa protein isoform 1 [Vitis vinifera]	gi|225440324	71067	0.442	FSDATVQSDIK	69.4	43.4	10.5		605.801	1209.59	1210.6	2	-0.0009819	-0.8111	81	91	5
3723	196	PREDICTED: heat shock cognate 70 kDa protein isoform 1 [Vitis vinifera]	gi|225440324	71067	0.442	GEGPAIGIDLGTTYScVGVWQHDR	120	41.7	13.8	c16: Carbamidomethyl (+57.02)	863.41	2587.21	2588.22	3	-0.004823	-1.864	5	28	5
3723	196	PREDICTED: heat shock cognate 70 kDa protein isoform 1 [Vitis vinifera]	gi|225440324	71067	0.442	IINEPTAAAIAYGLDK	80.2	41.9	11.2		553.971	1658.89	1659.9	3	0.004142	2.495	176	191	5
3723	196	PREDICTED: heat shock cognate 70 kDa protein isoform 1 [Vitis vinifera]	gi|225440324	71067	0.442	IINEPTAAAIAYGLDKK	78	39.4	12.9		596.67	1786.99	1787.99	3	0.003982	2.227	176	192	5
3723	196	PREDICTED: heat shock cognate 70 kDa protein isoform 1 [Vitis vinifera]	gi|225440324	71067	0.442	ITITNDK	42.4	45.9	4.32		402.727	803.439	804.446	2	0.0003981	0.4948	507	513	5
3723	196	PREDICTED: heat shock cognate 70 kDa protein isoform 1 [Vitis vinifera]	gi|225440324	71067	0.442	mKELESIcNPIIAK	30.5	43.6	9.14	m1: Oxidation (+15.99), c8: Carbamidomethyl (+57.02)	554.624	1660.85	1661.86	3	-0.003838	-2.31	602	615	5
3723	196	PREDICTED: heat shock cognate 70 kDa protein isoform 1 [Vitis vinifera]	gi|225440324	71067	0.442	MVNHFVQEFK	57.3	44	0		639.82	1277.62	1278.63	2	0.002278	1.782	243	252	5
3723	196	PREDICTED: heat shock cognate 70 kDa protein isoform 1 [Vitis vinifera]	gi|225440324	71067	0.442	NALENYAYNMR	65.2	40.8	0		679.811	1357.61	1358.62	2	-0.0007619	-0.5608	546	556	5
3723	196	PREDICTED: heat shock cognate 70 kDa protein isoform 1 [Vitis vinifera]	gi|225440324	71067	0.442	NQVAMNPINTVFDAK	74.9	43.8	0		831.417	1660.82	1661.83	2	-0.005202	-3.13	60	74	5
3723	196	PREDICTED: heat shock cognate 70 kDa protein isoform 1 [Vitis vinifera]	gi|225440324	71067	0.442	SINPDEAVAYGAAVQAAILSGEGNDK	76	42.7	14.7		854.092	2559.25	2560.25	3	0.008372	3.27	368	393	5
3723	196	PREDICTED: heat shock cognate 70 kDa protein isoform 1 [Vitis vinifera]	gi|225440324	71067	0.442	SSVHDVVLVGGSTR	59.2	42.8	12.8		706.879	1411.74	1412.75	2	0.002018	1.428	335	348	5
3723	196	PREDICTED: heat shock cognate 70 kDa protein isoform 1 [Vitis vinifera]	gi|225440324	71067	0.442	TTPSYVAFTDTER	81.8	42.3	10.2		744.357	1486.7	1487.7	2	0.005998	4.032	40	52	5
3723	196	PREDICTED: heat shock cognate 70 kDa protein isoform 1 [Vitis vinifera]	gi|225440324	71067	0.442	VEIIANDQGNR	69.6	43.1	11.5		614.817	1227.62	1228.63	2	-0.001982	-1.613	29	39	5
3723	196	PREDICTED: heat shock cognate 70 kDa protein isoform 1 [Vitis vinifera]	gi|225440324	71067	0.442	VQDLLLLDVTPLSLGLETAGGVMTVLIPR	97.7	29.2	0		1011.92	3032.74	3033.73	3	0.02304	7.595	394	422	5
3723	196	PREDICTED: heat shock cognate 70 kDa protein isoform 1 [Vitis vinifera]	gi|225440324	71067	0.442	VQQLLQDFFNGK	33.3	43.3	7.81		718.881	1435.75	1436.75	2	0.001738	1.21	352	363	5
3723	196	PREDICTED: heat shock cognate 70 kDa protein isoform 1 [Vitis vinifera]	gi|225440324	71067	0.442	VVAGPGDKPmIVVNYK	62	42	10	m10: Oxidation (+15.99)	568.311	1701.91	1702.92	3	-0.002523	-1.482	97	112	5
3723	196	PREDICTED: 70 kDa peptidyl-prolyl isomerase [Vitis vinifera]	gi|359497288	64042.9	0.11	EAEPmSIDSK	35	39.8	6.82	m5: Oxidation (+15.99)	561.753	1121.49	1122.5	2	-0.000377	-0.3358	561	570	6
3723	196	PREDICTED: 70 kDa peptidyl-prolyl isomerase [Vitis vinifera]	gi|359497288	64042.9	0.11	EGEGYERPNEGAVVK	65.9	43.2	9.22		545.266	1632.78	1633.78	3	0.002242	1.372	279	293	6
3723	196	PREDICTED: 70 kDa peptidyl-prolyl isomerase [Vitis vinifera]	gi|359497288	64042.9	0.11	FTLGQGQVIK	38.9	40.9	7.3		545.816	1089.62	1090.63	2	-0.0003219	-0.2952	85	94	6
3723	196	PREDICTED: 70 kDa peptidyl-prolyl isomerase [Vitis vinifera]	gi|359497288	64042.9	0.11	LEALETNK	42.4	44.5	8.57		459.251	916.487	917.494	2	-8.194e-05	-0.08931	550	557	6
3723	196	PREDICTED: 70 kDa peptidyl-prolyl isomerase [Vitis vinifera]	gi|359497288	64042.9	0.11	LQDGTVFLK	38.7	42.1	7.85		510.79	1019.56	1020.57	2	-0.0006219	-0.6094	300	308	6
3723	196	PREDICTED: 70 kDa peptidyl-prolyl isomerase [Vitis vinifera]	gi|359497288	64042.9	0.11	VTcNLNNAAcK	76.3	41.5	9.89	c3: Carbamidomethyl (+57.02), c10: Carbamidomethyl (+57.02)	632.791	1263.57	1264.58	2	-0.002873	-2.272	448	458	6
3723	196	PREDICTED: heat shock cognate 70 kDa protein isoform 1 [Vitis vinifera]	gi|225434984	71236.6	0.534	ATAGDTHLGGEDFDNR	115	38.5	13.2		559.247	1674.72	1675.73	3	-0.004858	-2.899	227	242	3
3723	196	PREDICTED: heat shock cognate 70 kDa protein isoform 1 [Vitis vinifera]	gi|225434984	71236.6	0.534	DAGVIAGLNVMR	61.8	43.7	0		608.332	1214.65	1215.65	2	0.004498	3.7	164	175	3
3723	196	PREDICTED: heat shock cognate 70 kDa protein isoform 1 [Vitis vinifera]	gi|225434984	71236.6	0.534	DNNLLGK	38.8	44.3	5.39		387.212	772.409	773.415	2	0.0004781	0.6181	458	464	3
3723	196	PREDICTED: heat shock cognate 70 kDa protein isoform 1 [Vitis vinifera]	gi|225434984	71236.6	0.534	EIAEAYLGSTVK	68.6	43	10.8		640.842	1279.67	1280.67	2	0.002898	2.263	133	144	3
3723	196	PREDICTED: heat shock cognate 70 kDa protein isoform 1 [Vitis vinifera]	gi|225434984	71236.6	0.534	ELESIcNPIIAK	46.5	43.3	8.68	c6: Carbamidomethyl (+57.02)	693.869	1385.72	1386.73	2	-4.724e-05	-0.03407	604	615	3
3723	196	PREDICTED: heat shock cognate 70 kDa protein isoform 1 [Vitis vinifera]	gi|225434984	71236.6	0.534	FEELNmDLFR	54.3	40.8	10.6	m6: Oxidation (+15.99)	665.311	1328.61	1329.61	2	-0.000497	-0.3738	308	317	3
3723	196	PREDICTED: heat shock cognate 70 kDa protein isoform 1 [Vitis vinifera]	gi|225434984	71236.6	0.534	FSDSSVQSDIK	73.9	41.4	12.2		606.79	1211.57	1212.57	2	-0.001042	-0.8593	81	91	3
3723	196	PREDICTED: heat shock cognate 70 kDa protein isoform 1 [Vitis vinifera]	gi|225434984	71236.6	0.534	GEGPAIGIDLGTTYScVGVWQHDR	120	41.7	13.8	c16: Carbamidomethyl (+57.02)	863.41	2587.21	2588.22	3	-0.004823	-1.864	5	28	3
3723	196	PREDICTED: heat shock cognate 70 kDa protein isoform 1 [Vitis vinifera]	gi|225434984	71236.6	0.534	IINEPTAAAIAYGLDK	80.2	41.9	11.2		553.971	1658.89	1659.9	3	0.004142	2.495	176	191	3
3723	196	PREDICTED: heat shock cognate 70 kDa protein isoform 1 [Vitis vinifera]	gi|225434984	71236.6	0.534	IINEPTAAAIAYGLDKK	78	39.4	12.9		596.67	1786.99	1787.99	3	0.003982	2.227	176	192	3
3723	196	PREDICTED: heat shock cognate 70 kDa protein isoform 1 [Vitis vinifera]	gi|225434984	71236.6	0.534	ITITNDK	42.4	45.9	4.32		402.727	803.439	804.446	2	0.0003981	0.4948	507	513	3
3723	196	PREDICTED: heat shock cognate 70 kDa protein isoform 1 [Vitis vinifera]	gi|225434984	71236.6	0.534	KIEDAIDQAIQWLDSNQLAEADEFEDK	88.9	41.6	13.4		1045.51	3133.5	3134.48	3	0.02542	8.11	575	601	3
3723	196	PREDICTED: heat shock cognate 70 kDa protein isoform 1 [Vitis vinifera]	gi|225434984	71236.6	0.534	LIGDAAK	43.3	44.3	-0.806		344.206	686.397	687.404	2	0.0008781	1.277	53	59	3
3723	196	PREDICTED: heat shock cognate 70 kDa protein isoform 1 [Vitis vinifera]	gi|225434984	71236.6	0.534	mKELESIcNPIIAK	30.5	43.6	9.14	m1: Oxidation (+15.99), c8: Carbamidomethyl (+57.02)	554.624	1660.85	1661.86	3	-0.003838	-2.31	602	615	3
3723	196	PREDICTED: heat shock cognate 70 kDa protein isoform 1 [Vitis vinifera]	gi|225434984	71236.6	0.534	MVNHFVQEFK	57.3	44	0		639.82	1277.62	1278.63	2	0.002278	1.782	243	252	3
3723	196	PREDICTED: heat shock cognate 70 kDa protein isoform 1 [Vitis vinifera]	gi|225434984	71236.6	0.534	NALENYAYNMR	65.2	40.8	0		679.811	1357.61	1358.62	2	-0.0007619	-0.5608	546	556	3
3723	196	PREDICTED: heat shock cognate 70 kDa protein isoform 1 [Vitis vinifera]	gi|225434984	71236.6	0.534	NQVAMNPINTVFDAK	74.9	43.8	0		831.417	1660.82	1661.83	2	-0.005202	-3.13	60	74	3
3723	196	PREDICTED: heat shock cognate 70 kDa protein isoform 1 [Vitis vinifera]	gi|225434984	71236.6	0.534	QFAAEEISSMVLIK	80.9	42.6	0		783.419	1564.82	1565.82	2	0.005758	3.677	117	130	3
3723	196	PREDICTED: heat shock cognate 70 kDa protein isoform 1 [Vitis vinifera]	gi|225434984	71236.6	0.534	SINPDEAVAYGAAVQAAILSGEGNEK	43	42.4	10		858.764	2573.27	2574.27	3	0.01033	4.014	368	393	3
3723	196	PREDICTED: heat shock cognate 70 kDa protein isoform 1 [Vitis vinifera]	gi|225434984	71236.6	0.534	STVHDVVLVGGSTR	29.4	42.2	9.55		476.261	1425.76	1426.76	3	0.004072	2.854	335	348	3
3723	196	PREDICTED: heat shock cognate 70 kDa protein isoform 1 [Vitis vinifera]	gi|225434984	71236.6	0.534	TLSSTAQTTIEIDSLYEGIDFYSTITR	76	41.8	12.6		1009.18	3024.51	3025.49	3	0.02733	9.034	279	305	3
3723	196	PREDICTED: heat shock cognate 70 kDa protein isoform 1 [Vitis vinifera]	gi|225434984	71236.6	0.534	TTPSYVAFTDTER	81.8	42.3	10.2		744.357	1486.7	1487.7	2	0.005998	4.032	40	52	3
3723	196	PREDICTED: heat shock cognate 70 kDa protein isoform 1 [Vitis vinifera]	gi|225434984	71236.6	0.534	VEIIANDQGNR	69.6	43.1	11.5		614.817	1227.62	1228.63	2	-0.001982	-1.613	29	39	3
3723	196	PREDICTED: heat shock cognate 70 kDa protein isoform 1 [Vitis vinifera]	gi|225434984	71236.6	0.534	VQDLLLLDVTPLSLGLETAGGVMTVLIPR	97.7	29.2	0		1011.92	3032.74	3033.73	3	0.02304	7.595	394	422	3
3723	196	PREDICTED: heat shock cognate 70 kDa protein isoform 1 [Vitis vinifera]	gi|225434984	71236.6	0.534	VQQLLQDFFNGK	33.3	43.3	7.81		718.881	1435.75	1436.75	2	0.001738	1.21	352	363	3
3723	196	PREDICTED: heat shock cognate 70 kDa protein isoform 2 [Vitis vinifera]	gi|359486799	71172.1	0.586	ATAGDTHLGGEDFDNR	115	38.5	13.2		559.247	1674.72	1675.73	3	-0.004858	-2.899	227	242	4
3723	196	PREDICTED: heat shock cognate 70 kDa protein isoform 2 [Vitis vinifera]	gi|359486799	71172.1	0.586	DAGVIAGLNVMR	61.8	43.7	0		608.332	1214.65	1215.65	2	0.004498	3.7	164	175	4
3723	196	PREDICTED: heat shock cognate 70 kDa protein isoform 2 [Vitis vinifera]	gi|359486799	71172.1	0.586	DNNLLGK	38.8	44.3	5.39		387.212	772.409	773.415	2	0.0004781	0.6181	458	464	4
3723	196	PREDICTED: heat shock cognate 70 kDa protein isoform 2 [Vitis vinifera]	gi|359486799	71172.1	0.586	EIAEAYLGSTVK	68.6	43	10.8		640.842	1279.67	1280.67	2	0.002898	2.263	133	144	4
3723	196	PREDICTED: heat shock cognate 70 kDa protein isoform 2 [Vitis vinifera]	gi|359486799	71172.1	0.586	ELESIcNPIIAK	46.5	43.3	8.68	c6: Carbamidomethyl (+57.02)	693.869	1385.72	1386.73	2	-4.724e-05	-0.03407	604	615	4
3723	196	PREDICTED: heat shock cognate 70 kDa protein isoform 2 [Vitis vinifera]	gi|359486799	71172.1	0.586	FEELNmDLFR	54.3	40.8	10.6	m6: Oxidation (+15.99)	665.311	1328.61	1329.61	2	-0.000497	-0.3738	308	317	4
3723	196	PREDICTED: heat shock cognate 70 kDa protein isoform 2 [Vitis vinifera]	gi|359486799	71172.1	0.586	GEGPAIGIDLGTTYScVGVWQHDR	120	41.7	13.8	c16: Carbamidomethyl (+57.02)	863.41	2587.21	2588.22	3	-0.004823	-1.864	5	28	4
3723	196	PREDICTED: heat shock cognate 70 kDa protein isoform 2 [Vitis vinifera]	gi|359486799	71172.1	0.586	IINEPTAAAIAYGLDK	80.2	41.9	11.2		553.971	1658.89	1659.9	3	0.004142	2.495	176	191	4
3723	196	PREDICTED: heat shock cognate 70 kDa protein isoform 2 [Vitis vinifera]	gi|359486799	71172.1	0.586	IINEPTAAAIAYGLDKK	78	39.4	12.9		596.67	1786.99	1787.99	3	0.003982	2.227	176	192	4
3723	196	PREDICTED: heat shock cognate 70 kDa protein isoform 2 [Vitis vinifera]	gi|359486799	71172.1	0.586	ITITNDK	42.4	45.9	4.32		402.727	803.439	804.446	2	0.0003981	0.4948	507	513	4
3723	196	PREDICTED: heat shock cognate 70 kDa protein isoform 2 [Vitis vinifera]	gi|359486799	71172.1	0.586	KIEDAVEQAIQWLDSNQLAEADEFEDK	7.99	41	8.43		1045.5	3133.47	3134.48	3	-0.007568	-2.414	575	601	4
3723	196	PREDICTED: heat shock cognate 70 kDa protein isoform 2 [Vitis vinifera]	gi|359486799	71172.1	0.586	LIGDAAK	43.3	44.3	-0.806		344.206	686.397	687.404	2	0.0008781	1.277	53	59	4
3723	196	PREDICTED: heat shock cognate 70 kDa protein isoform 2 [Vitis vinifera]	gi|359486799	71172.1	0.586	mKELESIcNPIIAK	30.5	43.6	9.14	m1: Oxidation (+15.99), c8: Carbamidomethyl (+57.02)	554.624	1660.85	1661.86	3	-0.003838	-2.31	602	615	4
3723	196	PREDICTED: heat shock cognate 70 kDa protein isoform 2 [Vitis vinifera]	gi|359486799	71172.1	0.586	MVNHFVQEFK	57.3	44	0		639.82	1277.62	1278.63	2	0.002278	1.782	243	252	4
3723	196	PREDICTED: heat shock cognate 70 kDa protein isoform 2 [Vitis vinifera]	gi|359486799	71172.1	0.586	mYQGAGGPDAGAGAmDDDGPSAGGSGAGPK	42.3	29.9	13	m1: Oxidation (+15.99), m15: Oxidation (+15.99)	885.36	2653.06	2654.07	3	-0.007558	-2.848	616	645	4
3723	196	PREDICTED: heat shock cognate 70 kDa protein isoform 2 [Vitis vinifera]	gi|359486799	71172.1	0.586	NALENYAYNMR	65.2	40.8	0		679.811	1357.61	1358.62	2	-0.0007619	-0.5608	546	556	4
3723	196	PREDICTED: heat shock cognate 70 kDa protein isoform 2 [Vitis vinifera]	gi|359486799	71172.1	0.586	NQVAMNPINTVFDAK	74.9	43.8	0		831.417	1660.82	1661.83	2	-0.005202	-3.13	60	74	4
3723	196	PREDICTED: heat shock cognate 70 kDa protein isoform 2 [Vitis vinifera]	gi|359486799	71172.1	0.586	QFAAEEISSMVLIK	80.9	42.6	0		783.419	1564.82	1565.82	2	0.005758	3.677	117	130	4
3723	196	PREDICTED: heat shock cognate 70 kDa protein isoform 2 [Vitis vinifera]	gi|359486799	71172.1	0.586	SINPDEAVAYGAAVQAAILSGEGNEK	43	42.4	10		858.764	2573.27	2574.27	3	0.01033	4.014	368	393	4
3723	196	PREDICTED: heat shock cognate 70 kDa protein isoform 2 [Vitis vinifera]	gi|359486799	71172.1	0.586	STIHDVVLVGGSTR	65.6	41.8	11.5		720.896	1439.78	1440.78	2	0.003518	2.442	335	348	4
3723	196	PREDICTED: heat shock cognate 70 kDa protein isoform 2 [Vitis vinifera]	gi|359486799	71172.1	0.586	TLSSTAQTTIEIDSLYEGIDFYSTITR	76	41.8	12.6		1009.18	3024.51	3025.49	3	0.02733	9.034	279	305	4
3723	196	PREDICTED: heat shock cognate 70 kDa protein isoform 2 [Vitis vinifera]	gi|359486799	71172.1	0.586	TTPSYVAFTDTER	81.8	42.3	10.2		744.357	1486.7	1487.7	2	0.005998	4.032	40	52	4
3723	196	PREDICTED: heat shock cognate 70 kDa protein isoform 2 [Vitis vinifera]	gi|359486799	71172.1	0.586	VEIIANDQGNR	69.6	43.1	11.5		614.817	1227.62	1228.63	2	-0.001982	-1.613	29	39	4
3723	196	PREDICTED: heat shock cognate 70 kDa protein isoform 2 [Vitis vinifera]	gi|359486799	71172.1	0.586	VQDLLLLDVTPLSLGLETAGGVMTVLIPR	97.7	29.2	0		1011.92	3032.74	3033.73	3	0.02304	7.595	394	422	4
3723	196	PREDICTED: heat shock cognate 70 kDa protein isoform 2 [Vitis vinifera]	gi|359486799	71172.1	0.586	VQQLLQDFFNGK	33.3	43.3	7.81		718.881	1435.75	1436.75	2	0.001738	1.21	352	363	4
3723	196	PREDICTED: heat shock cognate 70 kDa protein isoform 2 [Vitis vinifera]	gi|359486799	71172.1	0.586	VVPGPGDKPMITVTYK	86.4	41.7	0		567.98	1700.92	1701.92	3	-0.0001679	-0.09868	97	112	4
6018	197	PREDICTED: MLP-like protein 34 [Vitis vinifera]	gi|225424277	17080.7	0.722	AIVQTISK	53.5	40.7	5.95		430.267	858.519	859.525	2	0.001878	2.185	101	108	7
6018	197	PREDICTED: MLP-like protein 34 [Vitis vinifera]	gi|225424277	17080.7	0.722	EIVEAIDKENK	74.8	44.1	11.3		644.345	1286.68	1287.68	2	0.004378	3.4	71	81	7
6018	197	PREDICTED: MLP-like protein 34 [Vitis vinifera]	gi|225424277	17080.7	0.722	FHEVWGGRPHHMSSVSPGK	53.5	42.8	0		711.349	2131.03	2132.02	3	0.008042	3.772	20	38	7
6018	197	PREDICTED: MLP-like protein 34 [Vitis vinifera]	gi|225424277	17080.7	0.722	LEAEILILAPADK	79.9	37.9	12.5		698.41	1394.81	1395.81	2	0.003678	2.635	7	19	7
6018	197	PREDICTED: MLP-like protein 34 [Vitis vinifera]	gi|225424277	17080.7	0.722	LLGFVIHmNEELDDHLIQA	46.1	42.9	8.35	m8: Oxidation (+15.99)	1112.06	2222.11	2223.11	2	0.001043	0.4692	133	151	7
6018	197	PREDICTED: MLP-like protein 34 [Vitis vinifera]	gi|225424277	17080.7	0.722	VDLHEGDWGTVGSVIEWSYVIDGK	71.8	42.4	13.9		887.769	2660.28	2661.28	3	0.008132	3.056	42	65	7
6018	197	PREDICTED: MLP-like protein 34 [Vitis vinifera]	gi|225424277	17080.7	0.722	VIEGDLLK	33.3	44.2	5.21		443.768	885.522	886.525	2	0.004558	5.141	87	94	7
6018	197	PREDICTED: MLP-like protein 34 [Vitis vinifera]	gi|225424277	17080.7	0.722	WTFEYEK	37	39.4	3.93		501.735	1001.46	1002.46	2	0.006318	6.303	116	122	7
6018	197	PREDICTED: ubiquitin-conjugating enzyme E2 35 isoform 1 [Vitis vinifera]	gi|225461646	17220.9	0.51	IcLDILK	39.2	42.9	8.37	c2: Carbamidomethyl (+57.02)	437.759	873.503	874.507	2	0.003593	4.108	88	94	5
6018	197	PREDICTED: ubiquitin-conjugating enzyme E2 35 isoform 1 [Vitis vinifera]	gi|225461646	17220.9	0.51	IYHPNIDK	31	42.4	6.83		500.268	998.522	999.526	2	0.003438	3.44	77	84	5
6018	197	PREDICTED: ubiquitin-conjugating enzyme E2 35 isoform 1 [Vitis vinifera]	gi|225461646	17220.9	0.51	LLSEPAPGISASPSEDNmR	51.9	42.4	10.4	m18: Oxidation (+15.99)	662.985	1985.93	1986.94	3	-0.003293	-1.657	17	35	5
6018	197	PREDICTED: ubiquitin-conjugating enzyme E2 35 isoform 1 [Vitis vinifera]	gi|225461646	17220.9	0.51	TNEAEAVETAK	59.3	43.4	10.5		581.784	1161.55	1162.56	2	0.003018	2.596	133	143	5
6018	197	PREDICTED: ubiquitin-conjugating enzyme E2 35 isoform 1 [Vitis vinifera]	gi|225461646	17220.9	0.51	TVLLSIQALLSAPNPDDPLSENIAK	60.4	37.2	11.3		873.817	2618.43	2619.42	3	0.0109	4.162	105	129	5
6018	197	PREDICTED: ubiquitin-conjugating enzyme E2 35 isoform 1 [Vitis vinifera]	gi|225461646	17220.9	0.51	WSPALQIR	47.9	41.2	4.72		485.778	969.541	970.547	2	0.001118	1.152	97	104	5
6018	197	unnamed protein product [Vitis vinifera]	gi|297737681,gi|359472853	35245.1	0.206	LEAEILILAPADK	79.9	37.9	12.5		698.41	1394.81	1395.81	2	0.003678	2.635	7	19	1
6018	197	unnamed protein product [Vitis vinifera]	gi|297737681,gi|359472853	35245.1	0.206	VDLHEGDWGNVGSVIEWSYVIDGK	79.8	42.2	13.9		892.097	2673.27	2674.28	3	-0.003668	-1.372	42	65	1
6018	197	PREDICTED: chaperonin CPN60-2, mitochondrial isoform 1 [Vitis vinifera]	gi|225433375	61370.9	0.277	APGFGENR	45	42.2	4.98		424.207	846.399	847.406	2	0.0002781	0.3281	309	316	13
6018	197	PREDICTED: chaperonin CPN60-2, mitochondrial isoform 1 [Vitis vinifera]	gi|225433375	61370.9	0.277	cELENPLVLIHEK	53.3	43.4	11.4	c1: Carbamidomethyl (+57.02)	531.949	1592.83	1593.83	3	0.001707	1.071	244	256	13
6018	197	PREDICTED: chaperonin CPN60-2, mitochondrial isoform 1 [Vitis vinifera]	gi|225433375	61370.9	0.277	DDTVILDGAGDKK	54.7	44.3	10.9		449.565	1345.67	1346.68	3	-0.0009079	-0.6742	359	371	13
6018	197	PREDICTED: chaperonin CPN60-2, mitochondrial isoform 1 [Vitis vinifera]	gi|225433375	61370.9	0.277	ELDKLPTSNFDQK	43.3	43.6	8.58		512.264	1533.77	1534.78	3	0.002882	1.878	456	468	13
6018	197	PREDICTED: chaperonin CPN60-2, mitochondrial isoform 1 [Vitis vinifera]	gi|225433375	61370.9	0.277	GVEELADAVR	45.4	44.4	9.13		529.779	1057.54	1058.55	2	0.003818	3.607	50	59	13
6018	197	PREDICTED: chaperonin CPN60-2, mitochondrial isoform 1 [Vitis vinifera]	gi|225433375	61370.9	0.277	IGGASEAEVSEK	66.9	43.7	9.64		588.79	1175.56	1176.57	2	-0.002082	-1.769	412	423	13
6018	197	PREDICTED: chaperonin CPN60-2, mitochondrial isoform 1 [Vitis vinifera]	gi|225433375	61370.9	0.277	IGVQIIQNALK	49.7	36.3	10.2		598.872	1195.73	1196.74	2	-0.0003019	-0.2523	469	479	13
6018	197	PREDICTED: chaperonin CPN60-2, mitochondrial isoform 1 [Vitis vinifera]	gi|225433375	61370.9	0.277	ISNIHAVVK	45	37.4	11.1		490.797	979.58	980.589	2	-0.001842	-1.878	258	266	13
6018	197	PREDICTED: chaperonin CPN60-2, mitochondrial isoform 1 [Vitis vinifera]	gi|225433375	61370.9	0.277	LLEQDNPDLGYDAAK	69.8	43.2	9.14		831.405	1660.79	1661.8	2	-0.0002219	-0.1336	500	514	13
6018	197	PREDICTED: chaperonin CPN60-2, mitochondrial isoform 1 [Vitis vinifera]	gi|225433375	61370.9	0.277	NVVLEQSFGAPK	51.4	44	12.9		644.85	1287.68	1288.69	2	0.002458	1.907	68	79	13
6018	197	PREDICTED: chaperonin CPN60-2, mitochondrial isoform 1 [Vitis vinifera]	gi|225433375	61370.9	0.277	QVANATNDVAGDGTTcATVLTR	88.6	42.4	10.3	c16: Carbamidomethyl (+57.02)	745.692	2234.05	2235.07	3	-0.004983	-2.23	107	128	13
6018	197	PREDICTED: chaperonin CPN60-2, mitochondrial isoform 1 [Vitis vinifera]	gi|225433375	61370.9	0.277	SVAAGmNAmDLR	53.4	41.3	11.1	m6: Oxidation (+15.99), m9: Oxidation (+15.99)	634.292	1266.57	1267.58	2	0.000148	0.1168	137	148	13
6018	197	PREDICTED: chaperonin CPN60-2, mitochondrial isoform 1 [Vitis vinifera]	gi|225433375	61370.9	0.277	VTDALNATK	80.7	45.5	7.92		466.755	931.496	932.505	2	-0.002002	-2.147	427	435	13
6018	197	PREDICTED: ruBisCO large subunit-binding protein subunit beta, chloroplastic [Vitis vinifera]	gi|225435794	64608.5	0.097	DLINVLEDAIR	42.5	42.7	12.5		635.853	1269.69	1270.7	2	-0.001342	-1.056	294	304	5
6018	197	PREDICTED: ruBisCO large subunit-binding protein subunit beta, chloroplastic [Vitis vinifera]	gi|225435794	64608.5	0.097	EVELEDPVENIGAK	72.5	43.2	11.6		771.389	1540.76	1541.77	2	0.0002781	0.1804	122	135	5
6018	197	PREDICTED: ruBisCO large subunit-binding protein subunit beta, chloroplastic [Vitis vinifera]	gi|225435794	64608.5	0.097	LADLVGVTLGPK	72.2	37.9	12.3		591.859	1181.7	1182.71	2	0.002098	1.774	86	97	5
6018	197	PREDICTED: ruBisCO large subunit-binding protein subunit beta, chloroplastic [Vitis vinifera]	gi|225435794	64608.5	0.097	VEDALNATK	37.5	45.9	7.78		480.755	959.495	960.5	2	0.002098	2.184	458	466	5
6018	197	PREDICTED: ruBisCO large subunit-binding protein subunit beta, chloroplastic [Vitis vinifera]	gi|225435794	64608.5	0.097	VVAAGANPVLITR	65.4	35.7	9.57		640.887	1279.76	1280.77	2	-0.001662	-1.298	169	181	5
6018	197	PREDICTED: ubiquitin-conjugating enzyme E2 36 isoform 1 [Vitis vinifera]	gi|225446595,gi|225446597,gi|359485284	17220.9	0.386	SNEAEAVETAK	65	42.3	11.6		574.775	1147.54	1148.54	2	-0.0004219	-0.3674	133	143	1
6048	197	PREDICTED: ubiquitin-conjugating enzyme E2 36 isoform 1 [Vitis vinifera]	gi|225446595,gi|225446597,gi|359485284	17220.9	0.386	TVLLSIQALLSAPNPDDPLSENIAK	60.4	37.2	11.3		873.817	2618.43	2619.42	3	0.0109	4.162	105	129	1
4627	198	PREDICTED: chaperonin CPN60-2, mitochondrial isoform 1 [Vitis vinifera]	gi|225433375	61370.9	0.456	AAVEEGIVPGGGVALLYASK	53.7	40.5	9.19		634.351	1900.03	1901.04	3	0.001392	0.7323	436	455	25
4627	198	PREDICTED: chaperonin CPN60-2, mitochondrial isoform 1 [Vitis vinifera]	gi|225433375	61370.9	0.456	AELDmLGTcK	75.7	41	11.9	m5: Oxidation (+15.99), c9: Carbamidomethyl (+57.02)	577.264	1152.51	1153.52	2	-0.002622	-2.273	343	352	25
4627	198	PREDICTED: chaperonin CPN60-2, mitochondrial isoform 1 [Vitis vinifera]	gi|225433375	61370.9	0.456	AIFTEGcK	52.6	42.2	6.79	c7: Carbamidomethyl (+57.02)	463.226	924.438	925.445	2	7.276e-05	0.07862	129	136	25
[truncated: 198 more rows]

## Sheet: Feuil3
Supplemental Table 1c.
[truncated: 205 more rows]
